# Supplementary material for: Visible-light-promoted catalytic epoxidation of alkenes under metal-free conditions
Source: Royal Society of Chemistry journal article supplement (doi:10.1039/d4qo01265h), 2024-01-01

# Supporting Information

## Visible-Light-Promoted Catalytic Epoxidation of Alkenes under Metal-Free Conditions

Dabao Tan,<sup>a</sup> Xiaoyan Cai,<sup>c</sup> Boyu Liu,<sup>a</sup> Lele Zhang,<sup>b</sup> Feiming Li,<sup>a</sup> Zhixiong Cai,<sup>a</sup>  
Mingqiang Huang,<sup>a</sup> Xiaoping Chen,<sup>a</sup> and Shunyou Cai<sup>\*a,b</sup>

<sup>a</sup> Fujian Provincial Key Laboratory of Modern Analytical Science and Separation  
Technology, School of Chemistry, Chemical Engineering and Environment, Minnan  
Normal University, Zhangzhou, 363000, China.

<sup>b</sup> Guangdong Provincial Key Laboratory of Chemical Genomics, Shenzhen Graduate  
School, Peking University, Shenzhen, 518055, China.

E-mail: [caishy05@mnnu.edu.cn](mailto:caishy05@mnnu.edu.cn)

### Table of Contents

(100 Pages)

|                                                                                                           |      |
|-----------------------------------------------------------------------------------------------------------|------|
| Materials and methods                                                                                     | S2   |
| General procedure for Epoxidation synthesis                                                               | S3   |
| General procedure for <b>1e</b> , <b>3a</b> , <b>3i</b> and <b>S5</b> synthesis                           | S4   |
| <sup>1</sup> H and <sup>13</sup> C spectral data of some representative substrates                        | S9   |
| <sup>1</sup> H, <sup>13</sup> C and <sup>19</sup> F spectra data of compounds <b>2a-2l</b> , <b>4a-4t</b> | S12  |
| Late-stage diversification of substances derived from natural products and drugs                          | S26  |
| <sup>1</sup> H and <sup>13</sup> C spectra data of compounds <b>5-19</b>                                  | S26  |
| UV-Vis absorption experiments                                                                             | S35  |
| Transient fluorescence spectroscopy                                                                       | S36  |
| Fluorescence quenching experiments                                                                        | S37  |
| EPR experiments                                                                                           | S38  |
| CV curve of the substrate <b>1a</b>                                                                       | S39  |
| Copies of <sup>1</sup> H NMR, <sup>13</sup> C NMR and <sup>19</sup> F NMR spectra                         | S40  |
| COSY, NOESY, NOE, HMBC, HMQC spectra data of compounds <b>2k</b>                                          | S97  |
| High resolution mass spectrometry data of intermediate <b>V</b>                                           | S100 |

## Materials and methods

All the chemicals were purchased commercially and used without further purification. Thin-layer chromatography (TLC) was conducted with 0.25 mm Tsingdao silica gel plates (60F-254) and visualized by exposure to UV light (254 nm) or stained with potassium permanganate. Flash column chromatography was performed using Tsingdao silica gel (60, particle size 0.040–0.063 mm). Reagents were purchased at the highest commercial quality and used without further purification, unless otherwise stated. <sup>1</sup>H NMR spectra were recorded on JEOL spectrometers (at 400 MHz) and were reported relative to deuterated solvent signals. Data for <sup>1</sup>H NMR spectra were reported as follows: chemical shift ( $\delta$  ppm), multiplicity, coupling constant (Hz) and integration. <sup>13</sup>C NMR spectra were recorded on JEOL Spectrometers (at 100 MHz). Data for <sup>13</sup>C NMR spectra were reported in terms of chemical shift. Mass spectrometric data were obtained using Bruker Apex IV RTMS. The following abbreviations were used to explain the multiplicities: s = singlet, d = doublet, t = triplet, q = quartet, m = multiplet, br = broad.

## General procedure for Epoxidation synthesis

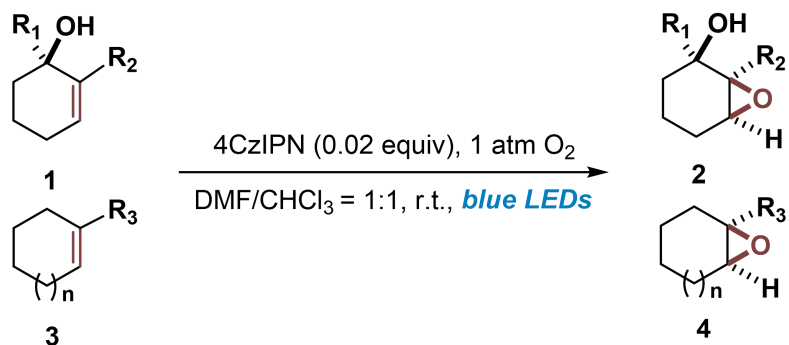

A flame-dried reaction tube was equipped with magnetic stir bar and charged with 5',6'-dihydro-[1,1':2',1''-terphenyl]-1'(4'H)-ol **1** or **3** (0.1199 mmol, 1.0 equiv), 4CzIPN (0.0024 mmol, 0.02 equiv), and DMF/CHCl<sub>3</sub> (1:1) (3.0 mL). The reaction mixture was irradiated by blue LEDs (12 W, wavelength 450 nm) under a balloon oxygen atmosphere at room temperature until the starting material disappeared from the TLC. After that, the reaction mixture was directly concentrated under reduced pressure and the crude residue was purified by silica gel column chromatography using Hexane/EtOAc (*v/v* = 2/1) to afford the desired pure product **2** or **4** in 41-92% yields.

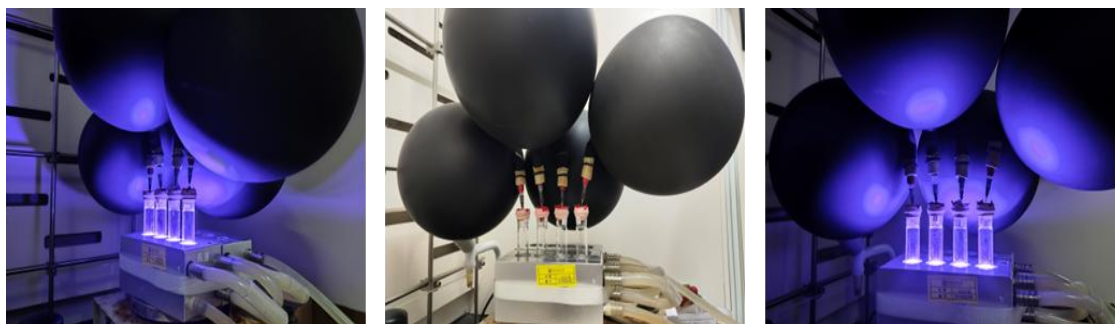

### General procedure for 1e synthesis

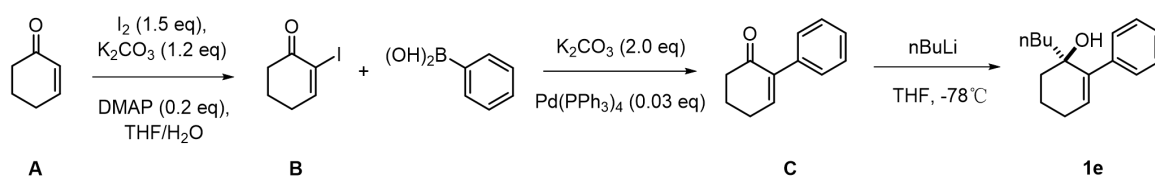

Cyclohexenone (A) (1.0 eq, 5.20 mmol) was dissolved in THF-H<sub>2</sub>O (24 mL, v/v=1:1) solvent in a dry 50 mL round-bottomed flask with (1.5 eq, 7.80 mmol) of I<sub>2</sub>, (1.2 eq, 6.24 mmol) of K<sub>2</sub>CO<sub>3</sub> and (0.2 eq, 1.04 mmol) of DMAP. At the end of the reaction, the reaction system was diluted with ethyl acetate (EA) and was washed sequentially by adding saturated sodium thiosulfate and 0.1 M aqueous HCl to the reaction system, followed by extraction with EA and purification by column chromatography to obtain 2-iodocyclohex-2-enone (B). Then, B (1.0 eq, 3.37 mmol) was further reacted with (1.5 eq, 5.06 mmol) of phenylboronic acid, (2.0 eq, 6.74 mmol) of potassium carbonate, and 0.03 eq of tetrakis(triphenylphosphine)palladium catalyst dissolved in 20 mL of toluene solvent in a dry 50 mL round-bottomed flask at 110° for 18h, and the reaction was tracked by TLC. The reaction was followed by TLC. The reaction system was rinsed with EA solvent through diatomaceous earth was filtered by sand core funnel extraction, the filtrate was washed with saturated aqueous sodium bicarbonate solution, extracted, dried, and finally separated and purified by column chromatography to give 4,5-dihydro-[1,1'-biphenyl]-2(3H)-One (C). A dry 10 mL of the test tube reactor was taken and protected with nitrogen, and anhydrous treatment was done with an electric gun, then C (1.0 eq, 2.03 mmol) was dissolved with 2 mL of dehydrated THF and added to the test tube reactor, and then (1.5 eq, 3.04 mmol) butyllithium reagent was slowly added dropwise to the test tube reactor for a reaction of 3 h at -78 °C, and then the reaction was bursted with a saturated ammonium chloride solution, and the EA extraction, and purification by column chromatographic separation in 90% yield to afford 1e.

### General procedure for 3a synthesis

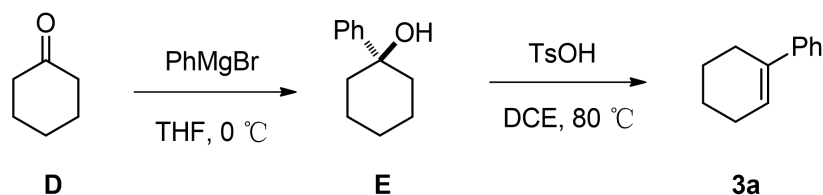

A 10 mL test tube reactor was taken and a magnetic stir bar was placed therein. Under the protection of ordinary nitrogen, the reactor was purged with an electric gun for three times and then evacuated. Cyclohexanone (**D**) (2.0 mmol, 1.0 eq) and anhydrous THF (3 mL) were added into the reactor. Finally, phenylmagnesium bromide reagent (2.8 mol/L, 1.5 eq) of 1.0 mL was slowly dropped at 0 °C. After the dropwise addition was completed, the reaction was allowed to slowly rise to room temperature and react for 5 h until the starting materials disappeared as detected by TLC. Then 5.0 mL of saturated ammonium chloride solution was slowly added to the reaction mixture. Subsequently, the organic phase was evaporated and concentrated under reduced pressure. The resulting residue was extracted with EtOAc (3×20.0 mL) and 15 mL of water. The organic phases were combined and washed with 20 mL of saturated brine, and dried over anhydrous sodium sulfate. After the organic phase was evaporated and concentrated under reduced pressure, it was separated and purified by column chromatography using n-hexane:ethyl acetate (4:1) to obtain 1-phenylcyclohexan-1-ol (**E**) with a separation yield of 95%. Next, a 10 mL test tube reactor was taken and a magnetic stir bar was placed therein. Under the protection of ordinary nitrogen, **E** (1.0 mmol, 1.0 eq), p-toluenesulfonic acid (0.3 mmol, 0.3 eq), and 2.0 mL of 1,2-dichloroethane were added. The reaction was heated at 80 °C until the disappearance of the reaction starting materials. Then saturated sodium bicarbonate solution (2.0 mL) was slowly added to the reaction mixture. Subsequently, the organic phase was evaporated and concentrated under reduced pressure. The resulting residue was extracted with EtOAc (3 × 20.0 mL) and 15 mL of water. The organic phases were combined and washed with 20 mL of saturated brine, and dried over anhydrous sodium sulfate. After the organic phase was evaporated and concentrated under reduced

pressure, it was separated and purified by column chromatography to obtain 2,3,4,5-tetrahydro-1,1'-biphenyl (**3a**) with a separation yield of 70%.

### General procedure for **3i** synthesis

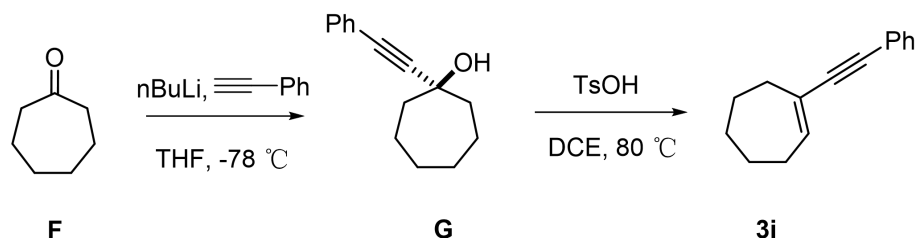

A 10 mL test tube reactor was taken and a magnetic stir bar was placed inside. Under the protection of ordinary nitrogen, the reactor was purged with an electric gun for three times and then evacuated. Phenylacetylene (2.4 mmol, 1.2 eq) was added to the reactor followed by the addition of anhydrous THF (3 mL). Then, 2 mL of n-butyl lithium reagent (1.6 mol/L, 1.3 eq) was slowly dropped at  $-78\text{ }^\circ\text{C}$  and stirred for half an hour. After that, cycloheptanone (**F**) (0.2 mL, 2.0 mmol, 1.0 eq) was slowly dropped at  $-78\text{ }^\circ\text{C}$ . After the dropwise addition was completed, the reaction was allowed to slowly rise to room temperature until the starting materials disappeared as detected by TLC. Then, 5.0 mL of saturated ammonium chloride solution was slowly added to quench the reaction. Subsequently, the organic phase was evaporated and concentrated under reduced pressure. The resulting residue was extracted with EtOAc ( $3\times 20.0\text{ mL}$ ) and 15 mL of water. The combined organic phase was washed with 20 mL of saturated brine, dried over anhydrous sodium sulfate, and evaporated and concentrated under reduced pressure. After separation and purification by column chromatography using n-hexane:ethyl acetate (4:1), 1-(phenylethynyl)cycloheptan-1-ol (**G**) was obtained with a separation yield of 90%.

Next, another 10 mL test tube reactor was taken and a magnetic stir bar was placed inside. Under the protection of ordinary nitrogen, **G** (1.0 mmol, 1.0 eq), *p*-toluenesulfonic acid (0.3 mmol, 0.3 eq), and 2.0 mL of 1,2-dichloroethane were added. The reaction was heated at  $80\text{ }^\circ\text{C}$  until the starting materials disappeared. Then, 2.0 mL of saturated sodium

bicarbonate solution was slowly added to the reaction mixture. Subsequently, the organic phase was evaporated and concentrated under reduced pressure. The resulting residue was extracted with EtOAc (3 × 20.0 mL) and 15 mL of water. The combined organic phase was washed with 20 mL of saturated brine, dried over anhydrous sodium sulfate, and evaporated and concentrated under reduced pressure. After separation and purification by column chromatography, 1-(phenylethynyl)cyclohept-1-ene (**3i**) was obtained with a separation yield of 70%.

### General procedure for S-5 synthesis

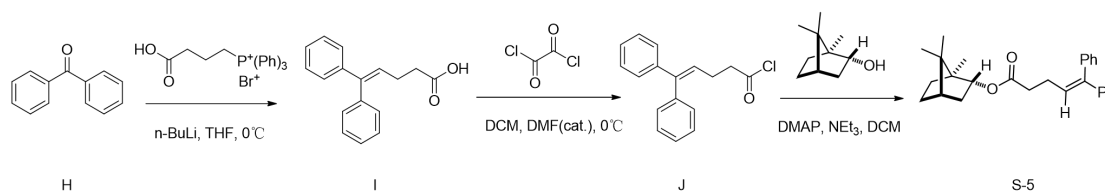

A 10 mL test tube reactor was taken into a magnetic stirrer and purged 3 times with an electric gun and evacuated under normal nitrogen protection. Weigh (3-carboxypropyl)triphenylphosphonium bromide (0.5227 mmol, 1 eq) into the test tube reactor add deuterated THF solvent and add *n*-BuLi (1.0453 mmol, 2 eq) slowly dropwise at 0 °C in an ice bath. After stirring for 45 min then THF solution of benzophenone was added dropwise to it. The reaction was stirred at room temperature for 12 h. At the end of the reaction, the organic phase was evaporated and concentrated under reduced pressure, and the resulting residue was extracted with EtOAc (3 × 20.0 mL) and 15 mL of water, the organic phases were combined and washed with 20 mL of saturated saline, dried with anhydrous sodium sulfate, and the organic phases were evaporated and concentrated under reduced pressure. The organic phase was evaporated and concentrated under reduced pressure. 5,5-diphenylpentanoic acid (**I**) was purified by column chromatography.

A 10 mL test tube reactor was taken into a magnetic stirrer and purged 3 times with an electric gun and evacuated under normal nitrogen protection. Acid (**I**) (0.8878 mmol, 1

eq.) was weighed into the tube reactor and dissolved with 2 mL of DCM, oxalyl chloride (4.4390 mmol, 5 eq.) was added dropwise at 0 °C, followed by 10  $\mu$ L of DMF at room temperature with stirring. At the end of the reaction, the organic phase was evaporated and concentrated under reduced pressure, and the resulting residue was extracted with EtOAc (3  $\times$  20.0 mL) and 15 mL of water, the organic phases were combined and washed with 20 mL of saturated saline, dried with anhydrous sodium sulfate, and the organic phases were evaporated and concentrated under reduced pressure. The organic phase was evaporated and concentrated under reduced pressure. 5,5-diphenylpentanoyl chloride (**J**) was purified by column chromatography.

A 10 mL test tube reactor was taken into a magnetic stirrer and purged 3 times with an electric gun and evacuated under normal nitrogen protection. Borneol (0.3409 mmol, 1 eq), DMAP (0.0341 mmol, 0.1 eq), and NEt<sub>3</sub> (0.6819 mmol, 2 eq) were dissolved in DCM and subsequently added dropwise at 0 °C. After the dropwise addition, the reaction was allowed to slowly warm up to room temperature until the material disappeared from the TLC. The organic phase was concentrated by evaporation under reduced pressure and the resulting residue was extracted with EtOAc (3  $\times$  20.0 mL) with 15 mL of water, the organic phases were combined and washed with 20 mL of saturated NaCl (aq.), dried over anhydrous sodium sulfate, and the organic phase was concentrated by evaporation under reduced pressure. S-5 was purified by column chromatography.



## <sup>1</sup>H and <sup>13</sup>C spectral data of some representative substrates

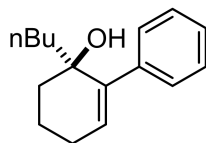

1e

**2-butyl-2,3,4,5-tetrahydro-[1,1'-biphenyl]-2-ol (1e):** <sup>1</sup>H NMR (400 MHz, CDCl<sub>3</sub>) δ 7.43-7.42 (m, 2H), 7.29-7.20 (m, 3H), 5.84-5.82 (m, 1H), 2.27-2.20 (m, 1H), 2.13-2.04 (m, 1H), 1.88 (s, 1H), 1.83-1.75 (m, 4H), 1.59-1.41 (m, 2H), 1.27-1.20 (m, 1H), 1.18-1.00 (m, 2H), 0.73-0.70 (t, *J* = 7.2 Hz, 3H); <sup>13</sup>C NMR (100 MHz, CDCl<sub>3</sub>) δ 143.5, 141.7, 130.7, 128.7, 127.8, 126.6, 72.4, 39.7, 35.8, 26.2, 26.1, 23.1, 18.7, 13.9; HRMS calculated for C<sub>16</sub>H<sub>22</sub>ONa (M + Na<sup>+</sup>): 253.1568, found: 253.1563. (Yellow oil)

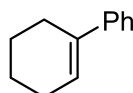

3a

**2,3,4,5-tetrahydro-1,1'-biphenyl (3a):** <sup>1</sup>H NMR (400 MHz, CDCl<sub>3</sub>) δ 7.39-7.37 (m, 2H), 7.35-7.28 (m, 2H), 7.24-7.19 (m, 1H), 6.13-6.11 (m, 1H), 2.43-2.40 (m, 2H), 2.23-2.19 (m, 2H), 1.81-1.75 (m, 2H), 1.69-1.63 (m, 2H); <sup>13</sup>C NMR (100 MHz, CDCl<sub>3</sub>) δ 142.8, 136.7, 128.3, 126.6, 125.0, 124.9, 27.5, 25.9, 23.2, 22.3; HRMS calculated for C<sub>12</sub>H<sub>15</sub> (M + H<sup>+</sup>): 159.1174, found: 159.1168. (Colourless oil)

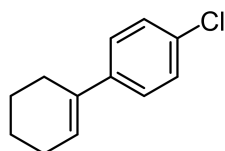

3c

**4'-chloro-2,3,4,5-tetrahydro-1,1'-biphenyl (3c):** <sup>1</sup>H NMR (400 MHz, CDCl<sub>3</sub>) δ 7.31-7.24 (m, 4H), 6.10 (s, 1H), 2.36-2.35 (m, 2H), 2.22-2.18 (m, 2H), 1.80-1.74 (m, 2H), 1.68-1.62 (m, 2H); <sup>13</sup>C NMR (100 MHz, CDCl<sub>3</sub>) δ 141.2, 135.6, 132.2, 128.3, 126.3,

125.5, 27.4, 25.9, 23.0, 22.1; HRMS calculated for C<sub>12</sub>H<sub>14</sub>Cl (M + H<sup>+</sup>): 193.0784, found: 193.0779. (White solid)

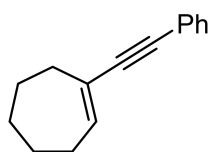

**3i**

**1-(phenylethynyl)cyclohept-1-ene (3i):** <sup>1</sup>H NMR (400 MHz, CDCl<sub>3</sub>) δ 7.43-7.39 (m, 2H), 7.30-7.25 (m, 3H), 6.41-6.38 (t, *J* = 6.8 Hz, 1H), 2.44-2.42 (m, 2H), 2.25-2.21 (m, 2H), 1.80-1.74 (m, 2H), 1.64-1.51 (m, 4H); <sup>13</sup>C NMR (100 MHz, CDCl<sub>3</sub>) δ 140.4, 131.9, 131.4, 128.3, 127.7, 127.0, 123.9, 93.0, 86.9, 34.4, 32.3, 29.4, 26.7, 26.6; HRMS calculated for C<sub>15</sub>H<sub>17</sub> (M + H<sup>+</sup>): 197.1330, found: 197.1325. (Yellow oil)

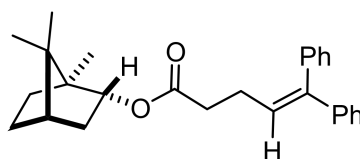

**(from Borneol)  
s-5**

**1,7,7-trimethylbicyclo[2.2.1]heptan-2-yl 5,5-diphenylpent-4-enoate (s-5):** <sup>1</sup>H NMR (400 MHz, CDCl<sub>3</sub>) δ 7.40-7.35 (m, 2H), 7.33-7.30 (m, 1H), 7.26-7.23 (m, 3H), 7.22-7.17 (m, 4H), 6.09-6.06 (m, 1H), 4.90-4.86 (m, 1H), 2.46-2.45 (m, 4H), 2.38-2.30 (m, 1H), 1.92-1.86 (m, 1H), 1.75-1.68 (m, 1H), 1.67-1.64 (m, 1H), 1.30-1.15 (m, 2H), 0.95-0.90 (m, 1H), 0.89 (s, 3H), 0.86 (s, 3H), 0.80 (s, 3H); <sup>13</sup>C NMR (100 MHz, CDCl<sub>3</sub>) δ 173.4, 142.9, 142.5, 139.8, 129.9, 128.3, 128.2, 127.6, 127.4, 127.2, 127.1, 79.9, 48.8, 47.9, 44.9, 36.9, 34.9, 28.1, 27.2, 25.6, 19.8, 18.9, 13.6; HRMS calculated for C<sub>27</sub>H<sub>32</sub>O<sub>2</sub>Na (M + Na<sup>+</sup>): 411.2300, found: 411.2295. (Colourless oil)

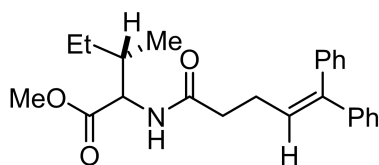

(from L-Isoleucine)  
s-6

**methyl 2-(5,5-diphenylpent-4-enamido)-3-methylpentanoate (s-6):**  $^1\text{H}$  NMR (400 MHz,  $\text{CDCl}_3$ )  $\delta$  7.40-7.35 (m, 2H), 7.33-7.17 (m, 8H), 6.08-6.05 (t,  $J = 7.2$  Hz 1H), 5.99-5.97 (d,  $J = 8.8$  Hz 1H), 4.62-4.58 (m, 1H), 3.71 (s, 3H), 2.51-2.45 (m, 2H), 2.36-2.32 (m, 2H), 1.88-1.81 (m, 1H), 1.44-1.37 (m, 1H), 1.62-1.09 (m, 1H), 0.91-0.86 (m, 6H);  $^{13}\text{C}$  NMR (100 MHz,  $\text{CDCl}_3$ )  $\delta$  172.7, 172.0, 143.0, 142.5, 139.8, 129.9, 128.4, 128.2, 127.6, 127.4, 127.3, 127.2, 56.4, 52.2, 38.1, 36.7, 25.9, 25.3, 15.5, 11.6; HRMS calculated for  $\text{C}_{24}\text{H}_{29}\text{O}_3\text{NNa}$  ( $\text{M} + \text{Na}^+$ ): 402.2045, found: 402.2040. (Colourless oil)

**<sup>1</sup>H, <sup>13</sup>C and <sup>19</sup>F spectra data of compounds 2a-2l, 4a-4t**

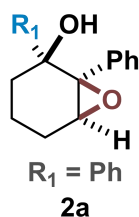

**1,2-diphenyl-7-oxabicyclo[4.1.0]heptan-2-ol (2a):** <sup>1</sup>H NMR (400 MHz, CDCl<sub>3</sub>) δ 7.39-7.38 (d, *J* = 7.2 Hz, 2H), 7.18-7.13 (m, 4H), 7.08-7.01 (m, 4H), 3.69 (s, 1H), 2.82-2.81 (d, *J* = 3.2 Hz, 1H), 2.23-2.12 (m, 1H), 2.06-1.92 (m, 2H), 1.62-1.42 (m, 3H); <sup>13</sup>C NMR (100 MHz, CDCl<sub>3</sub>) δ 144.1, 137.9, 128.8, 128.7, 127.7, 127.6, 127.5, 126.8, 126.3, 76.1, 66.2, 63.9, 38.6, 23.4, 16.2; HRMS calculated for C<sub>18</sub>H<sub>18</sub>O<sub>2</sub>Na (M + Na<sup>+</sup>): 289.1204, found: 289.1199. (Colourless solid, 21.3 mg, 67% isolated yield)

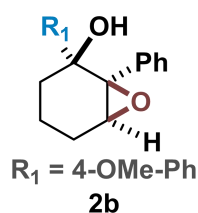

**2-(4-methoxyphenyl)-1-phenyl-7-oxabicyclo[4.1.0]heptan-2-ol (2b):** <sup>1</sup>H NMR (400 Hz, CDCl<sub>3</sub>) δ 7.39-7.36 (d, *J* = 8.4 Hz, 2H), 7.25-7.23 (m, 2H), 7.11-7.10 (d, *J* = 4.8 Hz, 3H), 6.78-6.76 (d, *J* = 8.4 Hz, 2H), 3.75 (s, 3H), 3.73 (s, 1H), 2.83 (s, 1H), 2.26-2.19 (m, 1H), 2.11-2.04 (m, 2H), 1.67-1.61 (m, 2H), 1.54-1.49 (m, 1H); <sup>13</sup>C NMR (100 MHz, CDCl<sub>3</sub>) δ 158.3, 137.9, 136.3, 128.7, 127.7, 127.6, 127.4, 113.1, 75.9, 66.1, 64.0, 55.2, 38.4, 23.2, 16.4; HRMS calculated for C<sub>19</sub>H<sub>20</sub>O<sub>3</sub>Na (M + Na<sup>+</sup>): 319.1310, found: 319.1305. (Yellow oil, 25.1 mg, 78% isolated yield)

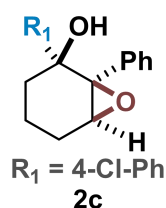

**2-(4-chlorophenyl)-1-phenyl-7-oxabicyclo[4.1.0]heptan-2-ol (2c):**  $^1\text{H}$  NMR (400 Hz,  $\text{CDCl}_3$ )  $\delta$  7.38-7.35 (m, 2H), 7.23-7.19 (m, 2H), 7.18-7.16 (m, 2H), 7.12-7.10 (m, 3H), 3.78-3.77 (m, 1H), 2.98 (s, 1H), 2.32-2.25 (m, 1H), 2.13-1.99 (m, 2H), 1.69-1.63 (m, 2H), 1.54-1.45 (m, 1H);  $^{13}\text{C}$  NMR (100 MHz,  $\text{CDCl}_3$ )  $\delta$  142.8, 137.7, 132.5, 128.7, 128.6, 127.8, 127.8, 127.7, 75.7, 66.2, 63.6, 38.9, 23.5, 15.9; HRMS calculated for  $\text{C}_{18}\text{H}_{17}\text{O}_2\text{ClNa}$  ( $\text{M} + \text{Na}^+$ ): 323.0815, found: 323.0809. (Yellow oil, 21.1 mg, 69% isolated yield)

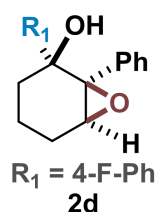

**2-(4-fluorophenyl)-1-phenyl-7-oxabicyclo[4.1.0]heptan-2-ol (2d):**  $^1\text{H}$  NMR (400 Hz,  $\text{CDCl}_3$ )  $\delta$  7.42-7.38 (m, 2H), 7.22-7.19 (m, 2H), 7.11-7.09 (m, 3H), 6.91-6.87 (m, 2H), 3.77-3.76 (t,  $J = 2.0$  Hz, 1H), 3.04 (s, 1H), 2.32-2.23 (m, 1H), 2.19-1.99 (m, 2H), 1.72-1.67 (m, 2H), 1.56-1.48 (m, 1H);  $^{13}\text{C}$  NMR (100 MHz,  $\text{CDCl}_3$ )  $\delta$  162.8, 160.3, 139.9, 137.9, 128.8, 128.7, 128.0, (d,  $J = 8.6$  Hz), 127.6, 114.5, (d,  $J = 21.1$  Hz) 75.6, 66.4, 63.7, 38.8, 23.6, 15.9;  $^{19}\text{F}$  NMR (376 MHz,  $\text{CDCl}_3$ )  $\delta$  -116.1; HRMS calculated for  $\text{C}_{18}\text{H}_{17}\text{O}_2\text{FNa}$  ( $\text{M} + \text{Na}^+$ ): 307.1110, found: 307.1105. (White solid, 20.9 mg, 66% isolated yield)

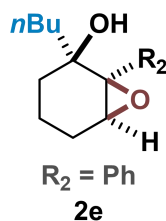

**2-butyl-1-phenyl-7-oxabicyclo[4.1.0]heptan-2-ol (2e):**  $^1\text{H}$  NMR (400 Hz,  $\text{CDCl}_3$ )  $\delta$

7.41-7.39 (m, 2H), 7.34-7.29 (m, 3H), 3.50-3.49 (d,  $J = 2.0$  Hz, 1H), 2.30 (s, 1H), 2.13-2.06 (m, 1H), 1.98-1.90 (m, 1H), 1.73-1.66 (m, 1H), 1.61-1.51 (m, 3H), 1.49-1.39 (m, 2H), 1.37-1.28 (m, 1H), 1.19-1.07 (m, 3H), 0.79-0.76 (t,  $J = 7.2$  Hz, 3H);  $^{13}\text{C}$  NMR (100 MHz,  $\text{CDCl}_3$ )  $\delta$  138.3, 128.9, 127.9, 127.8, 73.0, 68.0, 62.7, 37.9, 32.6, 25.3, 23.8, 23.3, 16.9, 14.1; HRMS calculated for  $\text{C}_{16}\text{H}_{21}\text{O}_2$  ( $\text{M} - \text{H}^+$ ): 245.1542, found: 245.1547. (Yellow oil, 24.7 mg, 77% isolated yield)

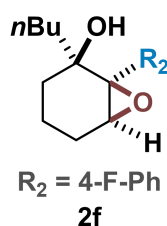

**2-butyl-1-(4-fluorophenyl)-7-oxabicyclo[4.1.0]heptan-2-ol (2f):**  $^1\text{H}$  NMR (400 Hz,  $\text{CDCl}_3$ )  $\delta$  7.39-7.36 (m, 2H), 7.03-6.99 (t,  $J = 8.4$  Hz, 2H), 3.48 (s, 1H), 2.25 (s, 1H), 2.12-2.06 (m, 1H), 1.97-1.91 (m, 1H), 1.70-1.51 (m, 4H), 1.48-1.39 (m, 2H), 1.34-1.28 (m, 1H), 1.17-1.05 (m, 3H), 0.81-0.78 (t,  $J = 7.2$  Hz, 3H);  $^{13}\text{C}$  NMR (100 MHz,  $\text{CDCl}_3$ )  $\delta$  134.3, 130.6, (d,  $J = 8.6$  Hz), 114.9, 114.7, 73.1, 67.4, 62.8, 37.8, 32.6, 25.3, 23.7, 23.3, 16.9, 14.1;  $^{19}\text{F}$  NMR (376 MHz,  $\text{CDCl}_3$ )  $\delta$  -113.9; HRMS calculated for  $\text{C}_{16}\text{H}_{21}\text{O}_2\text{FNa}$  ( $\text{M} + \text{Na}^+$ ): 287.1423, found: 287.1418. (Yellow oil, 21.4 mg, 67% isolated yield)

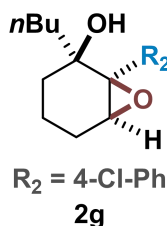

**2-butyl-1-(4-chlorophenyl)-7-oxabicyclo[4.1.0]heptan-2-ol (2g):**  $^1\text{H}$  NMR (400 Hz,  $\text{CDCl}_3$ )  $\delta$  7.35-7.29 (m, 4H), 3.47 (s, 1H), 2.23 (s, 1H), 2.12-2.05 (m, 1H), 1.96-1.91 (m, 1H), 1.71-1.65 (m, 1H), 1.57-1.32 (m, 5H), 1.17-1.07 (m, 4H), 0.82-0.78 (t,  $J = 6.8$  Hz, 3H);  $^{13}\text{C}$  NMR (100 MHz,  $\text{CDCl}_3$ )  $\delta$  136.9, 133.8, 130.3, 128.0, 72.9, 67.4, 62.7, 37.8,

32.6, 25.3, 23.7, 23.3, 16.9, 14.1; HRMS calculated for  $C_{16}H_{21}O_2ClNa$  ( $M + Na^+$ ): 303.1128, found: 303.1122. (White solid, 20.0 mg, 63% isolated yield)

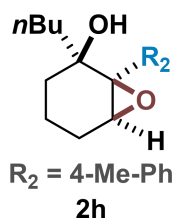

**2-butyl-1-(p-tolyl)-7-oxabicyclo[4.1.0]heptan-2-ol (2h):**  $^1H$  NMR (400 Hz,  $CDCl_3$ )  $\delta$  7.29-7.27 (m, 2H), 7.13-7.12 (d,  $J = 8.0$  Hz, 2H), 3.48 (s, 1H), 2.34 (s, 3H), 2.25 (s, 1H), 2.12-2.05 (m, 1H), 1.95-1.91 (m, 1H), 1.72-1.67 (m, 1H), 1.52-1.42 (m, 3H), 1.37-1.08 (m, 6H), 0.81-0.77 (t,  $J = 6.8$  Hz, 3H);  $^{13}C$  NMR (100 MHz,  $CDCl_3$ )  $\delta$  137.6, 135.4, 128.7, 128.5, 73.1, 67.9, 62.7, 37.9, 32.5, 25.3, 23.8, 23.3, 21.3, 16.9, 14.1; HRMS calculated for  $C_{17}H_{24}O_2Na$  ( $M + Na^+$ ): 283.1674, found: 283.1669. (Colourless oil, 24.9 mg, 78% isolated yield)

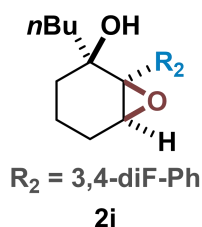

**2-butyl-1-(3,4-difluorophenyl)-7-oxabicyclo[4.1.0]heptan-2-ol (2i):**  $^1H$  NMR (400 Hz,  $CDCl_3$ )  $\delta$  7.28-7.24 (m, 1H), 7.13-7.09 (m, 2H), 3.47 (s, 1H), 2.19 (s, 1H), 2.11-2.04 (m, 1H), 1.96-1.91 (m, 1H), 1.69-1.62 (m, 1H), 1.57-1.51 (m, 2H), 1.47-1.32 (m, 3H), 1.25-1.11 (m, 4H), 0.83-0.80 (t,  $J = 6.8$  Hz, 3H);  $^{13}C$  NMR (100 MHz,  $CDCl_3$ )  $\delta$  150.9, (d,  $J = 11.5$  Hz), 148.4 (d,  $J = 11.5$  Hz), 135.3, 125.0, 118.3, (d,  $J = 17.3$  Hz), 116.6, (d,  $J = 17.2$  Hz) 73.1, 67.2, 62.9, 37.6, 32.5, 25.2, 23.5, 23.2, 17.1, 14.1;  $^{19}F$  NMR (376 MHz,  $CDCl_3$ )  $\delta$  -137.8, -138.5; HRMS calculated for  $C_{16}H_{20}O_2F_2Na$  ( $M + Na^+$ ): 305.1329, found: 305.1324. (White solid, 20.2 mg, 64% isolated yield)

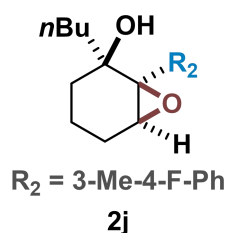

**2-butyl-1-(4-fluoro-3-methylphenyl)-7-oxabicyclo[4.1.0]heptan-2-ol (2j):**  $^1\text{H}$  NMR (400 Hz,  $\text{CDCl}_3$ )  $\delta$  7.24-7.23 (d,  $J = 1.2$  Hz, 1H), 7.17-7.14 (m, 1H), 6.96-6.91 (m, 1H), 3.47-3.46 (m, 1H), 2.27-2.26 (m, 4H), 2.12-2.05 (m, 1H), 1.97-1.89 (m, 1H), 1.71-1.65 (m, 1H), 1.58-1.50 (m, 2H), 1.48-1.40 (m, 2H), 1.37-1.29 (m, 1H), 1.19-1.12 (m, 4H), 0.82-0.78 (m, 3H);  $^{13}\text{C}$  NMR (100 MHz,  $\text{CDCl}_3$ )  $\delta$  159.7, 133.9, 132.0, (d,  $J = 4.8$  Hz) 127.7, (d,  $J = 8.6$  Hz) 124.3, (d,  $J = 17.3$  Hz) 114.3, (d,  $J = 22$  Hz) 73.1, 67.5, 62.8, 37.9, 32.6, 25.3, 23.7, 23.3, 16.9, 14.7, 14.6, 14.1;  $^{19}\text{F}$  NMR (376 MHz,  $\text{CDCl}_3$ )  $\delta$  -118.3; HRMS calculated for  $\text{C}_{17}\text{H}_{23}\text{O}_2\text{FNa}$  ( $\text{M} + \text{Na}^+$ ): 301.1580, found: 301.1574. (White solid, 19.1 mg, 60% isolated yield)

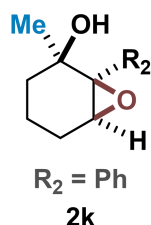

**2-methyl-1-phenyl-7-oxabicyclo[4.1.0]heptan-2-ol (2k):**  $^1\text{H}$  NMR (400 Hz,  $\text{CDCl}_3$ )  $\delta$  7.40-7.38 (d,  $J = 6.8$  Hz, 2H), 7.34-7.29 (m, 3H), 3.49 (s, 1H), 2.4 (s, 1H), 2.13-1.93 (m, 2H), 1.81-1.74 (m, 1H), 1.68-1.63 (m, 1H), 1.53-1.45 (m, 2H), 1.08 (s, 3H);  $^{13}\text{C}$  NMR (100 MHz,  $\text{CDCl}_3$ )  $\delta$  138.4, 128.5, 127.9, 127.8, 71.0, 67.5, 62.9, 37.4, 26.5, 24.0, 17.4; HRMS calculated for  $\text{C}_{13}\text{H}_{16}\text{O}_2\text{Na}$  ( $\text{M} + \text{Na}^+$ ): 227.1048, found: 227.1043. (Yellow oil, 18.2 mg, 56% isolated yield)



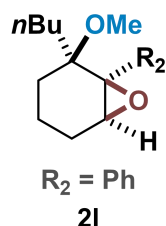

**2-butyl-2-methoxy-1-phenyl-7-oxabicyclo[4.1.0]heptane (2l):**  $^1\text{H}$  NMR (400 Hz,  $\text{CDCl}_3$ )  $\delta$  7.40-7.37 (m, 2H), 7.34-7.28 (m, 3H), 3.52 (s, 3H), 3.19-3.18 (d,  $J = 1.6$  Hz, 1H), 2.22-2.14 (m, 1H), 1.99-1.96 (m, 2H), 1.68-1.63 (m, 2H), 1.56-1.48 (m, 1H), 1.45-1.39 (m, 1H), 1.34-1.25 (m, 2H), 1.22-1.13 (m, 3H), 0.85-0.81 (t,  $J = 6.8$  Hz, 3H);  $^{13}\text{C}$  NMR (100 MHz,  $\text{CDCl}_3$ )  $\delta$  138.3, 129.1, 127.7, 127.6, 78.3, 67.2, 58.2, 51.5, 36.3, 25.3, 23.9, 23.3, 22.3, 18.7, 14.2; HRMS calculated for  $\text{C}_{17}\text{H}_{24}\text{O}_2\text{Na}$  ( $\text{M} + \text{Na}^+$ ): 283.1674, found: 283.1668. (Colourless oil, 16.8 mg, 56% isolated yield)

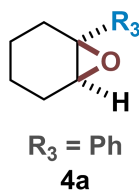

**1-([1,1'-biphenyl]-4-yl)-7-oxabicyclo[4.1.0]heptane (4a):**  $^1\text{H}$  NMR (400 Hz,  $\text{CDCl}_3$ )  $\delta$  7.39-7.32 (m, 4H), 7.28-7.24 (m, 1H), 3.08 (s, 1H), 2.32-2.25 (m, 1H), 2.15-2.09 (m, 1H), 2.00-1.98 (m, 2H), 1.56-1.55 (m, 1H), 1.51-1.43 (m, 1H), 1.37-1.26 (m, 2H);  $^{13}\text{C}$  NMR (100 MHz,  $\text{CDCl}_3$ )  $\delta$  142.6, 128.3, 127.3, 125.4, 62.0, 60.3, 28.9, 24.8, 20.2, 19.9; HRMS calculated for  $\text{C}_{12}\text{H}_{15}\text{O}$  ( $\text{M} + \text{H}^+$ ): 175.1123, found: 175.1117. (Yellow oil, 23.7 mg, 72% isolated yield)

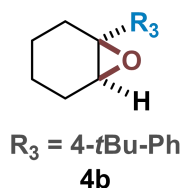

**1-(4-(tert-butyl)phenyl)-7-oxabicyclo[4.1.0]heptane (4b):**  $^1\text{H}$  NMR (400 Hz,  $\text{CDCl}_3$ )  $\delta$

7.30-7.28 (m, 2H), 7.26-7.22 (m, 2H), 3.01 (s, 1H), 2.24-2.18 (m, 1H), 2.08-2.03 (m, 1H), 1.93-1.89 (m, 1H), 1.53-1.48 (m, 3H), 1.26-1.21 (m, 11H);  $^{13}\text{C}$  NMR (100 MHz,  $\text{CDCl}_3$ )  $\delta$  150.2, 139.5, 137.6, 130.3, 125.3, 125.1, 62.1, 60.1, 43.5, 34.6, 31.4, 28.8, 24.8, 20.2, 19.9; HRMS calculated for  $\text{C}_{16}\text{H}_{23}\text{O}$  ( $\text{M} + \text{H}^+$ ): 231.1749, found: 231.1743. (Colourless solid, 23.2 mg, 72% isolated yield)

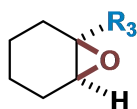

$\text{R}_3 = 4\text{-Cl-Ph}$   
**4c**

**1-(4-chlorophenyl)-7-oxabicyclo[4.1.0]heptane (4c):**  $^1\text{H}$  NMR (400 Hz,  $\text{CDCl}_3$ )  $\delta$  7.29 (s, 4H), 3.03 (s, 1H), 2.27-2.20 (m, 1H), 2.12-2.05 (m, 1H), 2.01-1.97 (m, 2H), 1.61-1.54 (m, 2H), 1.51-1.44 (m, 1H), 1.36-1.24 (m, 1H);  $^{13}\text{C}$  NMR (100 MHz,  $\text{CDCl}_3$ )  $\delta$  141.1, 133.1, 128.5, 126.9, 62.1, 59.9, 28.8, 24.7, 20.1, 19.8; HRMS calculated for  $\text{C}_{12}\text{H}_{14}\text{ClO}$  ( $\text{M} + \text{H}^+$ ): 209.0733, found: 209.0728. (White solid, 25.3 mg, 78% isolated yield)

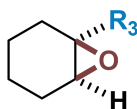

$\text{R}_3 = 2\text{-Naphthyl}$   
**4d**

**1-(naphthalen-2-yl)-7-oxabicyclo[4.1.0]heptane (4d):**  $^1\text{H}$  NMR (400 Hz,  $\text{CDCl}_3$ )  $\delta$  8.03-8.01 (d,  $J = 7.6$  Hz, 1H), 7.88-7.86 (d,  $J = 8.0$  Hz, 1H), 7.78-7.76 (d,  $J = 8.4$  Hz, 1H), 7.56-7.42 (m, 4H), 3.27 (s, 1H), 2.22-2.09 (m, 4H), 1.73-1.64 (m, 2H), 1.57-1.51 (m, 2H);  $^{13}\text{C}$  NMR (100 MHz,  $\text{CDCl}_3$ )  $\delta$  139.6, 133.6, 130.5, 128.9, 127.8, 126.2, 125.7, 125.5, 124.0, 123.9, 60.9, 59.8, 30.9, 25.0, 20.7, 19.2; HRMS calculated for  $\text{C}_{16}\text{H}_{17}\text{O}$  ( $\text{M} + \text{H}^+$ ): 225.1279, found: 225.1274. (White solid, 21.6 mg, 67% isolated yield)

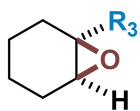

$R_3 = 4\text{-F-Ph}$   
**4e**

**1-(4-fluorophenyl)-7-oxabicyclo[4.1.0]heptane (4e):**  $^1\text{H}$  NMR (400 Hz,  $\text{CDCl}_3$ )  $\delta$  7.36-7.31 (m, 2H), 7.04-6.98 (m, 2H), 3.05-3.04 (t,  $J = 1.2$  Hz, 1H), 2.27-2.20 (m, 1H), 2.14-2.07 (m, 1H), 2.01-1.97 (m, 2H), 1.64-1.59 (m, 1H), 1.58-1.52 (m, 1H), 1.51-1.44 (m, 1H), 1.36-1.26 (m, 1H);  $^{13}\text{C}$  NMR (100 MHz,  $\text{CDCl}_3$ )  $\delta$  127.2, 127.1, 115.3, 115.0, 62.0, 59.9, 29.0, 24.7, 20.1, 19.8;  $^{19}\text{F}$  NMR (376 MHz,  $\text{CDCl}_3$ )  $\delta$  -115.5; HRMS calculated for  $\text{C}_{12}\text{H}_{14}\text{FO}$  ( $\text{M} + \text{H}^+$ ): 193.1029, found: 193.1023. (White solid, 21.6 mg, 69% isolated yield)

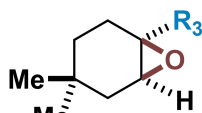

$R_3 = 4\text{-F-Ph}$   
**4f**

**1-(4-fluorophenyl)-4,4-dimethyl-7-oxabicyclo[4.1.0]heptane (4f):**  $^1\text{H}$  NMR (400 Hz,  $\text{CDCl}_3$ )  $\delta$  7.36-7.33 (m, 2H), 7.04-6.98 (m, 2H), 3.02-3.01 (d,  $J = 5.2$  Hz, 1H), 2.38-2.30 (m, 1H), 2.07-2.02 (m, 1H), 1.80-1.74 (m, 2H), 1.54-1.47 (m, 1H), 1.26-1.18 (m, 1H), 0.97 (s, 3H), 0.94 (s, 3H);  $^{13}\text{C}$  NMR (100 MHz,  $\text{CDCl}_3$ )  $\delta$  160.9, 137.8, (d,  $J = 40.2$  Hz) 127.2, (d,  $J = 8.6$  Hz) 115.2, (d,  $J = 21.1$  Hz) 60.9, 59.6, 38.5, 32.2, 31.4, 27.4, 26.5, 25.9, 25.4;  $^{19}\text{F}$  NMR (376 MHz,  $\text{CDCl}_3$ )  $\delta$  -115.3; HRMS calculated for  $\text{C}_{14}\text{H}_{18}\text{FO}$  ( $\text{M} + \text{H}^+$ ): 221.1342, found: 221.1336. (Colourless oil, 23.8 mg, 74% isolated yield)

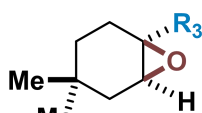

$R_3 = 4\text{-Cl-Ph}$   
**4g**

**1-(4-chlorophenyl)-4,4-dimethyl-7-oxabicyclo[4.1.0]heptane (4g):**  $^1\text{H}$  NMR (400 Hz,  $\text{CDCl}_3$ )  $\delta$  7.31-7.30 (m, 4H), 3.01-3.00 (d,  $J = 4.4$  Hz, 1H), 2.38-2.29 (m, 1H), 2.07-2.01 (m, 1H), 1.80-1.73 (m, 2H), 1.54-1.45 (m, 1H), 1.25-1.18 (m, 1H), 0.97 (s, 3H), 0.94 (s, 3H);  $^{13}\text{C}$  NMR (100 MHz,  $\text{CDCl}_3$ )  $\delta$  137.6, 130.3, 128.6, 126.9, 61.0, 59.5, 38.5, 32.1, 31.4, 27.4, 26.5, 25.2; HRMS calculated for  $\text{C}_{14}\text{H}_{18}\text{ClO}$  ( $\text{M} + \text{H}^+$ ): 237.1046, found: 237.1041. (White solid, 23.4 mg, 73% isolated yield)

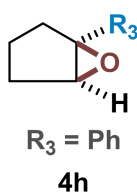

**1-phenyl-6-oxabicyclo[3.1.0]hexane (4h):**  $^1\text{H}$  NMR (400 Hz,  $\text{CDCl}_3$ )  $\delta$  7.40-7.32 (m, 4H), 7.30-7.27 (m, 1H), 3.56 (s, 1H), 2.28-2.19 (m, 2H), 2.14-2.09 (m, 1H), 1.83-1.78 (m, 1H), 1.75-1.70 (m, 1H), 1.65-1.60 (m, 1H);  $^{13}\text{C}$  NMR (100 MHz,  $\text{CDCl}_3$ )  $\delta$  138.0, 128.4, 127.7, 126.0, 67.0, 66.5, 29.0, 28.1, 19.4; HRMS calculated for  $\text{C}_{11}\text{H}_{13}\text{O}$  ( $\text{M} + \text{H}^+$ ): 161.0966, found: 161.0961. (White solid, 20.0 mg, 63% isolated yield)

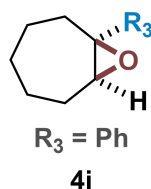

**1-phenyl-8-oxabicyclo[5.1.0]octane (4j):**  $^1\text{H}$  NMR (400 Hz,  $\text{CDCl}_3$ )  $\delta$  7.37-7.30 (m, 4H), 7.26-7.22 (m, 1H), 3.04-3.02 (m, 1H), 2.44-2.38 (m, 1H), 2.16-2.09 (m, 1H), 2.07-2.00 (m, 2H), 1.71-1.64 (m, 3H), 1.63-1.60 (m, 1H), 1.58-1.54 (m, 1H), 1.38-1.31 (m, 1H);  $^{13}\text{C}$  NMR (100 MHz,  $\text{CDCl}_3$ )  $\delta$  143.8, 128.3, 127.1, 125.2, 65.6, 63.3, 33.7, 31.5, 29.7, 25.2, 24.6; HRMS calculated for  $\text{C}_{13}\text{H}_{17}\text{O}$  ( $\text{M} + \text{H}^+$ ): 189.1279, found: 189.1274. (Yellow oil, 21.5 mg, 68% isolated yield)

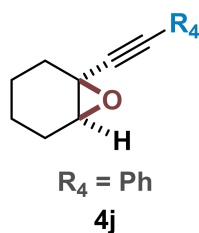

**1-(phenylethynyl)-7-oxabicyclo[4.1.0]heptane (4j):**  $^1\text{H}$  NMR (400 Hz,  $\text{CDCl}_3$ )  $\delta$  7.43-7.42 (d,  $J = 6.0$  Hz, 2H), 7.30-7.29 (d,  $J = 4.4$  Hz, 3H), 3.45 (s, 1H), 2.28-2.21 (m, 1H), 2.14-2.07 (m, 1H), 1.96-1.95 (m, 2H), 1.47-1.45 (m, 2H), 1.39-1.26 (m, 2H);  $^{13}\text{C}$  NMR (100 MHz,  $\text{CDCl}_3$ )  $\delta$  131.9, 128.6, 128.3, 122.4, 89.7, 82.1, 60.5, 50.8, 29.9, 24.3, 19.6, 19.0; HRMS calculated for  $\text{C}_{14}\text{H}_{15}\text{O}$  ( $\text{M} + \text{H}^+$ ): 199.1123, found: 199.1117. (Colourless oil, 23.3 mg, 72% isolated yield)

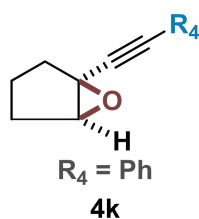

**1-(phenylethynyl)-6-oxabicyclo[3.1.0]hexane (4k):**  $^1\text{H}$  NMR (400 Hz,  $\text{CDCl}_3$ )  $\delta$  7.42-7.40 (m, 2H), 7.31-7.25 (m, 3H), 2.55-2.50 (m, 1H), 2.21-2.19 (m, 1H), 2.14-2.06 (m, 1H), 1.94-1.81 (m, 2H), 1.78-1.69 (m, 1H), 1.67-1.62 (m, 1H);  $^{13}\text{C}$  NMR (100 MHz,  $\text{CDCl}_3$ )  $\delta$  131.6, 128.3, 127.6, 124.1, 92.6, 84.7, 49.9, 44.6, 38.7, 32.9, 26.2; HRMS calculated for  $\text{C}_{13}\text{H}_{13}\text{O}$  ( $\text{M} + \text{H}^+$ ): 185.0966, found: 185.0961 (Colourless oil, 23.0 mg, 70% isolated yield)

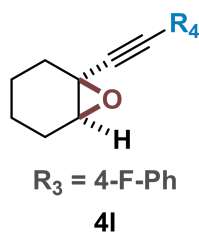

**1-((4-fluorophenyl)ethynyl)-7-oxabicyclo[4.1.0]heptane (4l):**  $^1\text{H}$  NMR (400 Hz,  $\text{CDCl}_3$ )  $\delta$  7.43-7.39 (m, 2H), 7.01-6.97 (t,  $J = 8.0$  Hz, 2H), 3.44 (s, 1H), 2.27-2.20 (m, 1 H), 2.13-2.06 (m, 1H), 1.98-1.94 (m, 2H), 1.48-1.43 (m, 2H), 1.39-1.28 (m, 2H);  $^{13}\text{C}$  NMR (100 MHz,  $\text{CDCl}_3$ )  $\delta$  161.4, 133.8, (d,  $J = 7.7$  Hz) 118.5, 115.6, (d,  $J = 22.1$  Hz) 89.4, 81.1, 60.5, 50.7, 29.8, 24.3, 19.5, 18.9;  $^{19}\text{F}$  NMR (376 MHz,  $\text{CDCl}_3$ )  $\delta$  -110.4; HRMS calculated for  $\text{C}_{14}\text{H}_{14}\text{FO}$  ( $\text{M} + \text{H}^+$ ): 217.1029, found: 217.1023. (Colourless oil, 22.6 mg, 70% isolated yield)

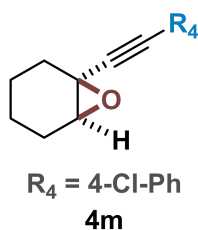

**1-((4-chlorophenyl)ethynyl)-7-oxabicyclo[4.1.0]heptane (4m):**  $^1\text{H}$  NMR (400 Hz,  $\text{CDCl}_3$ )  $\delta$  7.37-7.35 (m, 2H), 7.28-7.26 (m, 2H), 3.44-3.43 (t,  $J = 2.8$  Hz, 1H), 2.27-2.19 (m, 1H), 2.13-2.01 (m, 1H), 1.98-1.94 (m, 2H), 1.50-1.25 (m, 4H);  $^{13}\text{C}$  NMR (100 MHz,  $\text{CDCl}_3$ )  $\delta$  134.6, 133.3 128.7, 120.9, 90.7, 80.9, 60.5, 50.7, 29.8, 24.3, 19.5, 18.9; HRMS calculated for  $\text{C}_{14}\text{H}_{14}\text{ClO}$  ( $\text{M} + \text{H}^+$ ): 233.0733, found: 233.0728. (Colourless oil, 21.9 mg, 68% isolated yield)

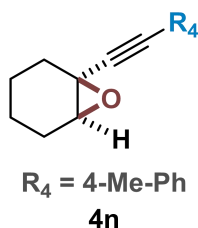

**1-(p-tolylolethynyl)-7-oxabicyclo[4.1.0]heptane (4n):**  $^1\text{H}$  NMR (400 Hz,  $\text{CDCl}_3$ )  $\delta$  7.33-7.31 (d,  $J = 8.4$  Hz, 2H), 7.12-7.09 (d,  $J = 7.6$  Hz, 2H), 3.44-3.43 (m, 1H), 2.34 (s, 3H), 2.27-2.20 (m, 1H), 2.14-2.08 (m, 1H), 1.97-1.93 (m, 2H), 1.51-1.42 (m, 2H), 1.37-1.24 (m, 2H);  $^{13}\text{C}$  NMR (100 MHz,  $\text{CDCl}_3$ )  $\delta$  138.7, 137.6, 131.8, 130.3, 129.1,

119.3, 89.0, 82.3, 60.5, 50.9, 29.9, 24.3, 21.6, 19.6, 19.0; HRMS calculated for C<sub>15</sub>H<sub>17</sub>O (M + H<sup>+</sup>): 213.1279, found: 213.1274. (Colourless oil, 23.3 mg, 72% isolated yield)

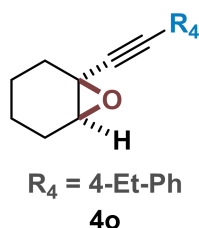

**1-((4-ethylphenyl)ethynyl)-7-oxabicyclo[4.1.0]heptane (4o):** <sup>1</sup>H NMR (400 Hz, CDCl<sub>3</sub>) δ 7.35-7.33 (d, *J* = 8.0 Hz, 2H), 7.13-7.11 (d, *J* = 8.4 Hz, 2H), 3.44-3.43 (m, 1H), 2.66-2.60 (m, 2H), 2.27-2.21 (m, 1H), 2.14-2.07 (m, 1H), 1.98-1.94 (m, 2H), 1.51-1.43 (m, 2H), 1.39-1.28 (m, 2H), 1.24-1.20 (t, *J* = 7.6 Hz, 3H); <sup>13</sup>C NMR (100 MHz, CDCl<sub>3</sub>) δ 144.9, 131.9, 127.9, 119.6, 89.1, 82.3, 60.5, 50.9, 29.9, 28.9, 24.3, 19.6, 19.0, 15.4; HRMS calculated for C<sub>16</sub>H<sub>19</sub>O (M + H<sup>+</sup>): 227.1436, found: 227.1430. (Colourless oil, 22.9 mg, 71% isolated yield)

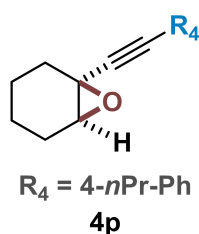

**1-((4-propylphenyl)ethynyl)-7-oxabicyclo[4.1.0]heptane (4p):** <sup>1</sup>H NMR (400 Hz, CDCl<sub>3</sub>) δ 7.35-7.33 (d, *J* = 8.4 Hz, 2H), 7.11-7.09 (d, *J* = 8.0 Hz, 2H), 3.44-3.43 (m, 1H), 2.58-2.55 (t, *J* = 7.2 Hz, 2H), 2.27-2.20 (m, 1H), 2.13-2.06 (m, 1H), 1.97-1.93 (m, 2H), 1.64-1.59 (m, 2H), 1.51-1.43 (m, 2H), 1.39-1.24 (m, 2H), 0.94-0.90 (t, *J* = 7.2 Hz, 3H); <sup>13</sup>C NMR (100 MHz, CDCl<sub>3</sub>) δ 143.5, 131.8, 128.5, 119.6, 89.0, 82.3, 60.5, 50.7, 38.0, 29.9, 24.4, 19.6, 19.0, 13.8; HRMS calculated for C<sub>17</sub>H<sub>21</sub>O (M + H<sup>+</sup>): 241.1592, found: 241.1587. (Yellow oil, 24.1 mg, 75% isolated yield)

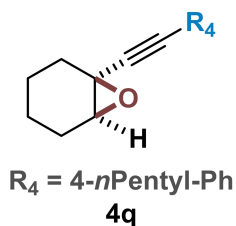

**1-((4-pentylphenyl)ethynyl)-7-oxabicyclo[4.1.0]heptane (4q):**  $^1\text{H}$  NMR (400 Hz,  $\text{CDCl}_3$ )  $\delta$  7.35-7.33 (d,  $J = 7.6$  Hz, 2H), 7.11-7.09 (d,  $J = 8.4$  Hz, 2H), 3.43 (s, 1H), 2.59-2.56 (t,  $J = 7.2$  Hz, 2H), 2.27-2.20 (m, 1H), 2.13-2.06 (m, 1H), 1.97-1.93 (m, 2H), 1.62-1.55 (m, 2H), 1.50-1.41 (m, 2H), 1.33-1.26 (m, 6H), 0.89-0.86 (t,  $J = 6.8$  Hz, 3H);  $^{13}\text{C}$  NMR (100 MHz,  $\text{CDCl}_3$ )  $\delta$  143.7, 131.8, 128.5, 119.5, 89.0, 82.3, 60.5, 50.9, 35.9, 31.5, 30.9, 29.9, 24.3, 22.6, 19.6, 19.0, 14.1; HRMS calculated for  $\text{C}_{19}\text{H}_{24}\text{ONa}$  ( $\text{M} + \text{Na}^+$ ): 291.1725, found: 291.1719. (Yellow oil, 22.5 mg, 71% isolated yield)

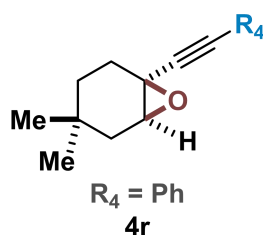

**4,4-dimethyl-1-(phenylethynyl)-7-oxabicyclo[4.1.0]heptane (4r) :**  $^1\text{H}$  NMR (400 Hz,  $\text{CDCl}_3$ )  $\delta$  7.45-7.43 (m, 2H), 7.31-7.30 (m, 3H), 3.41-3.40 (d,  $J = 5.6$  Hz, 1H), 2.28-2.22 (m, 1H), 2.20-2.12 (m, 1H), 1.80-1.74 (m, 1H), 1.62-1.60 (m, 1H), 1.40-1.32 (m, 1H), 1.14-1.09 (m, 1H), 0.94 (s, 3H), 0.90 (s, 3H);  $^{13}\text{C}$  NMR (100 MHz,  $\text{CDCl}_3$ )  $\delta$  131.9, 128.6, 128.3, 122.4, 89.3, 82.2, 59.5, 50.6, 37.8, 31.6, 31.2, 27.3, 26.6, 26.5; HRMS calculated for  $\text{C}_{16}\text{H}_{19}\text{O}$  ( $\text{M} + \text{H}^+$ ): 227.1436, found: 227.1430. (Yellow oil, 24.5 mg, 76% isolated yield)

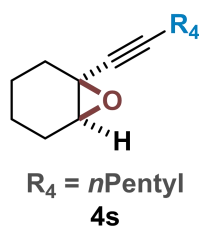



**(1S,6S)-1-(hept-1-yn-1-yl)-7-oxabicyclo[4.1.0]heptane (4s):**  $^1\text{H}$  NMR (400 Hz,  $\text{CDCl}_3$ )  $\delta$  3.29 (s, 1H), 2.20-2.09 (m, 3H), 1.99-1.88 (m, 3H), 1.53-1.46 (m, 2H), 1.43-1.18 (m, 8H), 0.91-0.88 (t,  $J = 6.8$  Hz, 3H);  $^{13}\text{C}$  NMR (100 MHz,  $\text{CDCl}_3$ )  $\delta$  83.2, 80.7, 60.2, 50.7, 31.1, 30.2, 28.3, 24.3, 22.3, 19.6, 19.1, 18.8, 14.0; HRMS calculated for  $\text{C}_{13}\text{H}_{21}\text{O}$  ( $\text{M} + \text{H}^+$ ): 193.1592, found: 193.1587. (Colourless oil, 22.9 mg, 70% isolated yield)

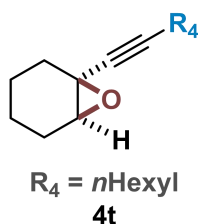

**1-(oct-1-yn-1-yl)-7-oxabicyclo[4.1.0]heptane (4t):**  $^1\text{H}$  NMR (400 Hz,  $\text{CDCl}_3$ )  $\delta$  3.29-3.28 (t,  $J = 2$  Hz, 1H), 2.20-2.17 (m, 2H), 2.15-2.09 (m, 1H), 2.00-1.93 (m, 1H), 1.93-1.88 (m, 2H), 1.53-1.44 (m, 2H), 1.43-1.36 (m, 3H), 1.34-1.26 (m, 7H), 0.90-0.87 (t,  $J = 8.4$  Hz, 3H);  $^{13}\text{C}$  NMR (100 MHz,  $\text{CDCl}_3$ )  $\delta$  83.2, 80.7, 60.2, 50.7, 31.4, 30.2, 28.6, 28.5, 24.3, 22.6, 19.6, 19.1, 18.8, 14.1; HRMS calculated for  $\text{C}_{14}\text{H}_{23}\text{O}$  ( $\text{M} + \text{H}^+$ ): 207.1749, found: 207.1743. (Colourless oil, 22.4 mg, 69% isolated yield)

## Late-stage diversification of substances derived from natural products and drugs

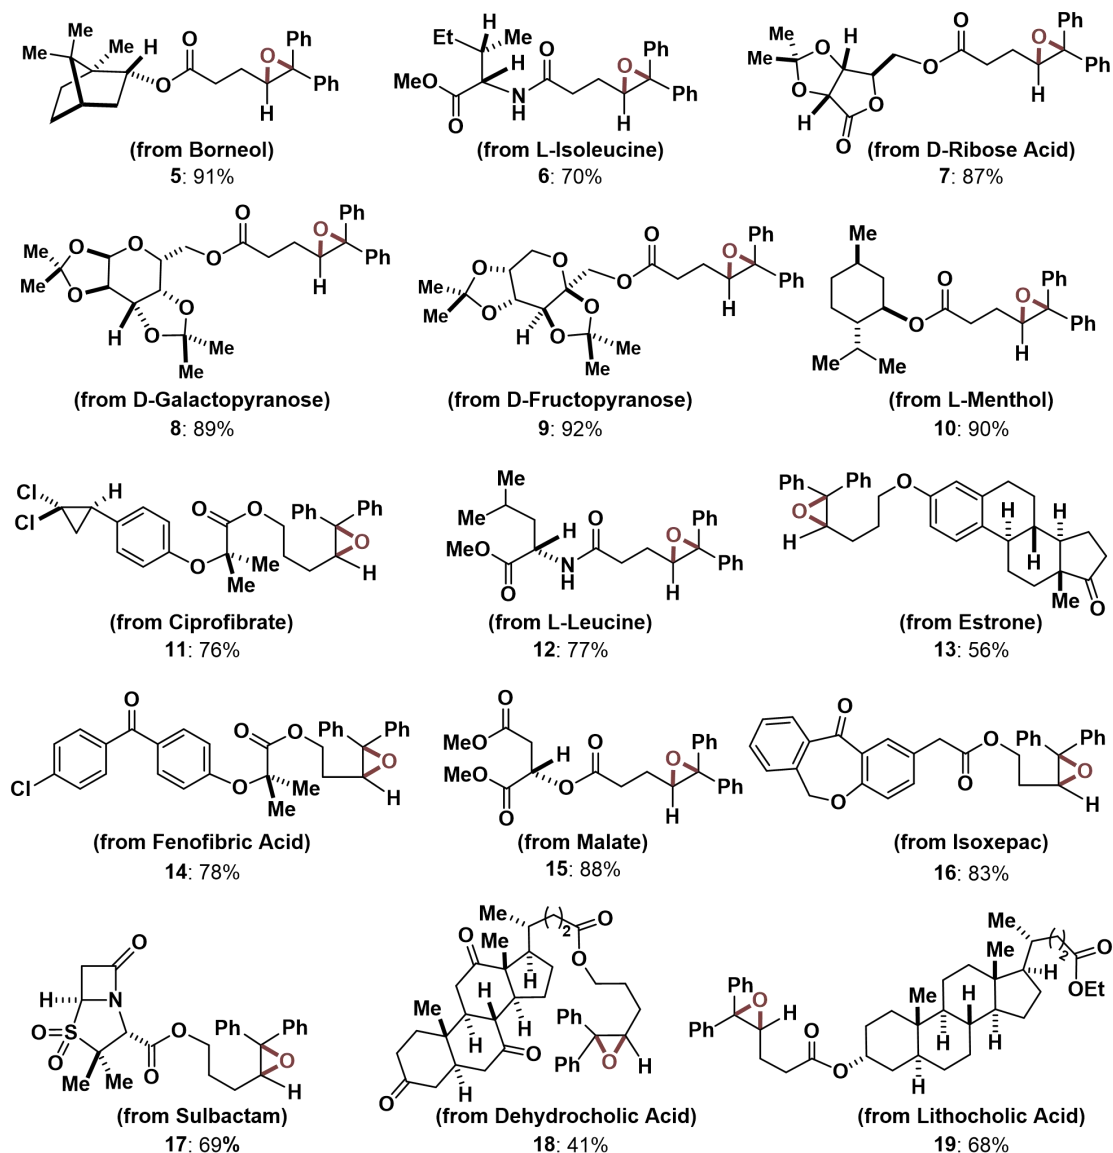

### <sup>1</sup>H and <sup>13</sup>C spectra data of compounds 5-19

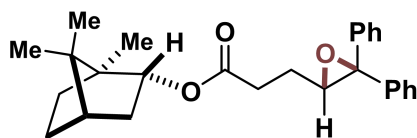

(from Borneol)

5

1,7,7-trimethylbicyclo[2.2.1]heptan-2-yl 3-(3,3-diphenyloxiran-2-yl)propanoate (5):

$^1\text{H}$  NMR (400 MHz,  $\text{CDCl}_3$ )  $\delta$  7.42-7.35 (m, 4H), 7.33-7.30 (m, 5H), 7.29-7.27 (m, 1H), 4.88-4.84 (m, 1H), 3.51-3.48 (m, 1H), 2.49-2.46 (t,  $J = 7.2$  Hz, 1H), 2.34-2.30 (m, 1H), 1.90-1.81 (m, 2H), 1.76-1.70 (m, 1H), 1.67-1.64 (m, 1H), 1.57-1.52 (m, 1H), 1.30-1.18 (m, 3H), 0.96-0.90 (m, 1H), 0.89 (s, 3H), 0.86 (s, 3H), 0.80-0.78 (d,  $J = 7.2$  Hz, 3H);  $^{13}\text{C}$  NMR (100 MHz,  $\text{CDCl}_3$ )  $\delta$  173.2, 140.8, 137.3, 130.3, 128.4, 128.3, 128.0, 127.9, 127.8, 127.1, 80.2, 66.6, 65.4, 48.8, 47.9, 44.9, 36.8, 31.2, 28.1, 27.2, 25.3, 19.8, 18.9, 13.6; HRMS calculated for  $\text{C}_{27}\text{H}_{32}\text{O}_3\text{Na}$  ( $\text{M} + \text{Na}^+$ ): 427.2249, found: 427.2244. (Yellow oil, 28.4 mg, 91% isolated yield)

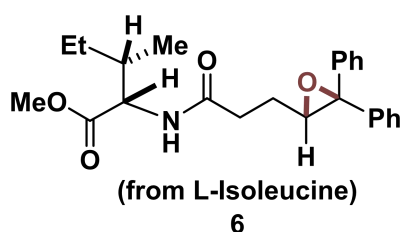

**methyl 2-(3-(3,3-diphenyloxiran-2-yl)propanamido)-3-methylpentanoate (6):**  $^1\text{H}$  NMR (400 MHz,  $\text{CDCl}_3$ )  $\delta$  7.42-7.35 (m, 4H), 7.33-7.28 (m, 6H), 6.08-6.04 (t,  $J = 7.2$  Hz, 1H), 4.55-4.55 (m, 1H), 3.72 (s, 3H), 3.50-3.46 (m, 1H), 2.42-2.37 (m, 2H), 2.02-1.95 (m, 1H), 1.88-1.82 (m, 1H), 1.49-1.37 (m, 2H), 1.20-1.12 (m, 1H), 0.92-0.86 (m, 6H);  $^{13}\text{C}$  NMR (100 MHz,  $\text{CDCl}_3$ )  $\delta$  172.6, 171.6, 140.8, 137.3, 128.3, 128.0, 127.9, 127.8, 127.0, 66.7, 65.6, 56.5, 52.2, 37.9, 33.0, 25.8, 25.3, 15.5, 11.7; HRMS calculated for  $\text{C}_{24}\text{H}_{29}\text{O}_4\text{NNa}$  ( $\text{M} + \text{Na}^+$ ): 418.1994, found: 418.1989. (Colourless oil, 21.3 mg, 70% isolated yield)

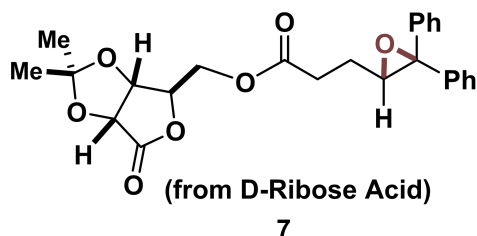

**(2,2-dimethyl-6-oxotetrahydrofuro[3,4-*d*][1,3]dioxol-4-yl)methyl 3-(3,3-diphenyl-**

**oxiran-2-yl)propanoate (7):**  $^1\text{H}$  NMR (400 MHz,  $\text{CDCl}_3$ )  $\delta$  7.40-7.38 (m, 4H), 7.37-7.27 (m, 6H), 4.76-4.75 (m, 1H), 4.71-4.65 (m, 2H), 4.38-4.33 (m, 1H), 4.25-4.22 (m, 1H), 3.47-3.42 (m, 1H), 2.50-2.45 (m, 2H), 1.93-1.86 (m, 1H), 1.53-1.41 (m, 4H), 1.38-1.36 (d,  $J = 7.6$  Hz, 3H);  $^{13}\text{C}$  NMR (100 MHz,  $\text{CDCl}_3$ )  $\delta$  173.5, 171.7, 140.5, 137.0, 128.5, 128.1, 128.0, 127.9, 127.1, 127.0, 113.9, 79.6, 77.7, 75.2, 65.1, 64.7, 63.7, 30.7, 26.8, 25.6, 25.1; HRMS calculated for  $\text{C}_{25}\text{H}_{26}\text{O}_7\text{Na}$  ( $\text{M} + \text{Na}^+$ ): 461.1576, found: 461.1571. (Yellow oil, 27.1 mg, 87% isolated yield)

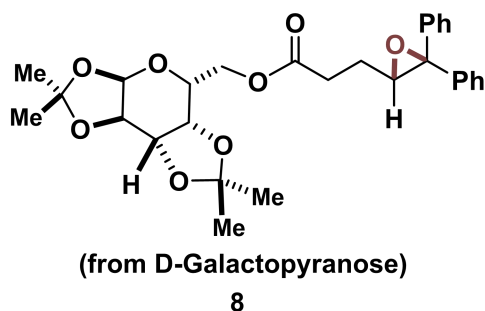

**(2,2,7,7-tetramethyltetrahydro-5H-bis([1,3]dioxolo)[4,5-b:4',5'-d]pyran-5-yl)methyl 3-(3,3-diphenyloxiran-2-yl)propanoate (8):**  $^1\text{H}$  NMR (400 MHz,  $\text{CDCl}_3$ )  $\delta$  7.41-7.34 (m, 4H), 7.33-7.27 (m, 6H), 5.53-5.51 (m, 1H), 4.62-4.59 (m, 1H), 4.33-4.30 (m, 1H), 4.29-4.25 (m, 1H), 4.22-4.17 (m, 2H), 4.02-3.98 (m, 1H), 3.51-3.48 (m, 1H), 2.53-2.49 (m, 2H), 1.89-1.83 (m, 1H), 1.57-1.49 (m, 1H), 1.45-1.44 (d,  $J = 5.2$  Hz, 6H), 1.32 (s, 6H);  $^{13}\text{C}$  NMR (100 MHz,  $\text{CDCl}_3$ )  $\delta$  172.7, 137.3, 128.4, 128.3, 128.0, 127.9, 127.8, 127.2, 127.1, 109.7, 108.9, 96.3, 71.1, 70.7, 70.5, 66.6, 65.9, 65.2, 63.6, 30.8, 26.0, 25.2, 25.0, 24.5, 23.9; HRMS calculated for  $\text{C}_{29}\text{H}_{34}\text{O}_8\text{Na}$  ( $\text{M} + \text{Na}^+$ ): 533.2151, found: 533.2146. (Colourless oil, 26.7 mg, 89% isolated yield)

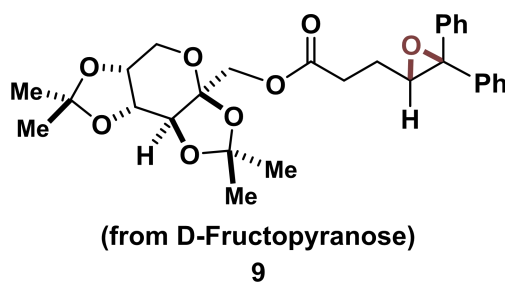

**2,2,7,7-tetramethyltetrahydro-3aH-bis([1,3]dioxolo)[4,5-b:4',5'-d]pyran-3a-yl)methyl 3-((S)-3,3-diphenyloxiran-2-yl)propanoate (9)** :  $^1\text{H}$  NMR (400 MHz,  $\text{CDCl}_3$ )  $\delta$  7.41-7.35 (m, 5H), 7.33-7.28 (m, 5H), 4.60-4.58 (m, 1H), 4.23-4.40 (m, 1H), 4.28-4.27 (m, 1H), 4.25-4.23 (m, 1H), 4.04-4.00 (m, 1H), 3.92-3.88 (m, 1H), 3.77-3.74 (m, 1H), 3.50-3.47 (m, 1H), 2.55-2.51 (m, 2H), 1.94-1.87 (m, 1H), 1.60 (s, 2H), 1.53-1.52 (d,  $J = 3.6$  Hz, 4H), 1.36-1.34 (m, 7H). ;  $^{13}\text{C}$  NMR (100 MHz,  $\text{CDCl}_3$ )  $\delta$  172.1, 140.7, 137.2, 128.4, 128.4, 128.0, 127.9, 127.8, 127.1, 109.2, 108.8, 101.5, 7, 66.6, 65.4, 65.2, 61.3, 30.7, 26.5, 26.0, 25.3, 25.1, 24.1; HRMS calculated for  $\text{C}_{29}\text{H}_{34}\text{O}_8\text{Na}$  ( $\text{M} + \text{Na}^+$ ): 533.2151, found: 533.2146. (Yellow oil, 27.6 mg, 92% isolated yield)

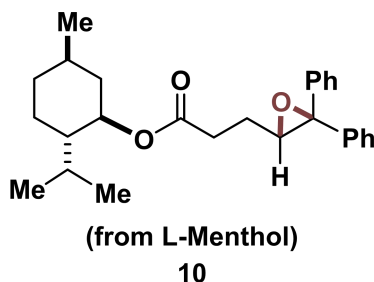

**2-isopropyl-5-methylcyclohexyl 3-((S)-3,3-diphenyloxiran-2-yl)propanoate (10)** :  $^1\text{H}$  NMR (400 MHz,  $\text{CDCl}_3$ )  $\delta$  7.42-7.35 (m, 4H), 7.33-7.27 (m, 6H), 4.70-4.63 (m, 1H), 3.49-3.45 (m, 1H), 2.45-2.42 (m, 2H), 1.97-1.93 (m, 1H), 1.86-1.79 (m, 2H), 1.68-1.64 (m, 2H), 1.56-1.50 (m, 1H), 1.49-1.43 (m, 1H), 1.38-1.31 (m, 1H), 1.05-0.97 (m, 1H), 0.96-0.92 (m, 1H), 0.90-0.86 (m, 6H), 0.84-0.83 (m, 1H), 0.73-0.69 (m, 3H);  $^{13}\text{C}$  NMR (100 MHz,  $\text{CDCl}_3$ )  $\delta$  172.4, 140.9, 137.3, 128.4, 128.3, 128.0, 127.9, 127.8, 127.1, 74.5, 66.6, 65.3, 47.0, 41.0, 34.3, 31.4, 31.2, 26.3, 25.3, 23.5, 22.1, 20.8, 16.4; HRMS calculated for  $\text{C}_{27}\text{H}_{34}\text{O}_3\text{Na}$  ( $\text{M} + \text{Na}^+$ ): 429.2406, found: 429.2400. (Colourless oil, 27 mg, 90% isolated yield)

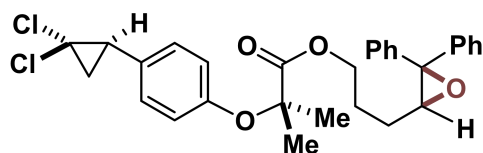

(from Ciprofibrate)

11

**3-(3,3-diphenyloxiran-2-yl)propyl-2-(4-(2,2-dichlorocyclopropyl)phenoxy)-2-methyl propanoate (11):**  $^1\text{H}$  NMR (400 MHz,  $\text{CDCl}_3$ )  $\delta$  7.36-7.35 (d,  $J = 4.4$  Hz, 4H), 7.31-7.26 (m, 6H), 7.09-7.07 (d,  $J = 8.8$  Hz, 2H), 6.77-6.75 (d,  $J = 8.0$  Hz, 2H), 4.20-4.08 (m, 2H), 3.35-3.32 (m, 1H), 2.81-2.76 (m, 1H), 1.93-1.87 (m, 1H), 1.81-1.73 (m, 3H), 1.53-1.52 (d,  $J = 2.4$  Hz, 6H), 1.49-1.40 (m, 1H), 1.23-1.15 (m, 1H);  $^{13}\text{C}$  NMR (100 MHz,  $\text{CDCl}_3$ )  $\delta$  174.2, 155.0, 140.9, 137.3, 129.7, 128.4, 128.3, 128.0, 127.9, 127.0, 118.6, 79.2, 66.3, 65.9, 64.9, 60.9, 34.9, 26.2, 25.9, 25.5, 25.4, 25.3, 25.3; HRMS calculated for  $\text{C}_{30}\text{H}_{30}\text{O}_4\text{Cl}_2\text{Na}$  ( $\text{M} + \text{Na}^+$ ): 547.1419, found: 547.1413. (Colourless oil, 22.8 mg, 76% isolated yield)

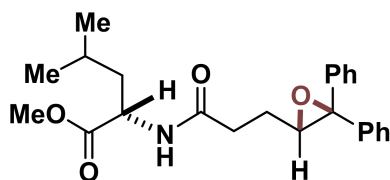

(from L-Leucine)

12

**methyl (3-(3,3-diphenyloxiran-2-yl)propanoyl)leucinate (12):**  $^1\text{H}$  NMR (400 MHz,  $\text{CDCl}_3$ )  $\delta$  7.41-7.35 (m, 4H), 7.33-7.26 (m, 6H), 5.95-5.90 (t,  $J = 9.2$  Hz, 1H), 4.65-4.57 (m, 1H), 3.71-3.70 (d,  $J = 1.2$  Hz, 3H), 3.51-3.45 (m, 1H), 2.41-2.36 (m, 2H), 2.03-1.95 (m, 1H), 1.65-1.59 (m, 2H), 1.48-1.40 (m, 1H);  $^{13}\text{C}$  NMR (100 MHz,  $\text{CDCl}_3$ )  $\delta$  173.6, 171.6, 140.8, 137.3, 128.4, 128.4, 128.1, 127.9, 127.9, 127.0, 65.6, 52.4, 50.8, 41.7, 32.9, 25.6, 24.9, 22.9, 22.0. HRMS calculated for  $\text{C}_{24}\text{H}_{29}\text{O}_4\text{NNa}$  ( $\text{M} + \text{Na}^+$ ): 418.1994, found: 418.1989. (Colourless oil, 23.1 mg, 77% isolated yield)

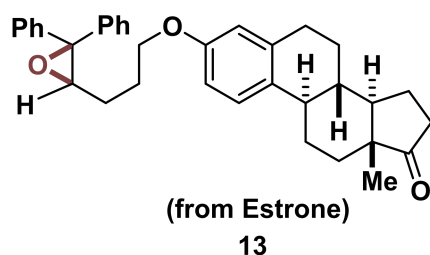

**3-(3-(3,3-diphenyloxiran-2-yl)propoxy)-13-methyl-6,7,8,9,11,12,13,14,15,16-decahydro-17H-cyclopenta[a]phenanthren-17-one (13):**  $^1\text{H}$  NMR (400 MHz,  $\text{CDCl}_3$ )  $\delta$  7.42-7.38 (m, 3H), 7.36-7.30 (m, 7H), 7.18-7.16 (d,  $J = 8.4$  Hz, 1H), 6.66-6.63 (m, 1H), 6.57-6.56 (d,  $J = 2.4$  Hz, 1H), 3.96-3.86 (m, 2H), 3.50-3.47 (m, 1H), 2.89-2.85 (m, 2H), 2.54-2.47 (m, 1H), 2.40-2.36 (m, 1H), 2.24 (s, 1H), 2.17-2.10 (m, 1H), 2.05-1.92 (m, 4H), 1.68-1.61 (m, 2H), 1.54-1.41 (m, 6H), 1.25 (s, 1H), 0.90 (s, 3H);  $^{13}\text{C}$  NMR (100 MHz,  $\text{CDCl}_3$ )  $\delta$  221.2, 156.9, 141.1, 137.8, 137.5, 132.1, 128.4, 128.2, 128.1, 127.9, 127.7, 127.1, 126.4, 114.6, 112.2, 67.3, 66.2, 50.5, 44.0, 38.4, 36.0, 31.6, 29.7, 26.6, 26.5, 26.2, 26.0, 21.7, 14.0. HRMS calculated for  $\text{C}_{35}\text{H}_{38}\text{O}_3\text{Na}$  ( $\text{M} + \text{Na}^+$ ): 529.2719, found: 529.2713. (Colourless oil, 17.3 mg, 56% isolated yield)

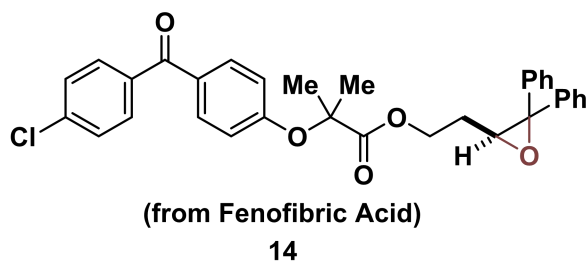

**2-(3-(3-diphenyloxiran-2-yl)ethyl)-2-methylpropanoate (14):**  $^1\text{H}$  NMR (400 MHz,  $\text{CDCl}_3$ )  $\delta$  7.70-7.65 (m, 4H), 7.44-7.42 (d,  $J = 8.4$  Hz, 2H), 7.36-7.34 (m, 5H), 7.24-7.21 (m, 3H), 7.18-7.16 (m, 2H), 6.86-6.84 (m, 2H), 4.32-4.29 (m, 2H), 3.32-3.29 (m, 1H), 1.87-1.81 (m, 2H), 1.68 (s, 6H);  $^{13}\text{C}$  NMR (100 MHz,  $\text{CDCl}_3$ )  $\delta$  194.2, 173.8, 159.6, 140.4, 137.0, 136.4, 132.2, 131.3, 130.4, 128.6, 128.4, 128.3, 128.0, 127.9, 127.0, 117.1, 98.9, 79.4, 66.1, 63.0, 29.2, 25.8; HRMS calculated for  $\text{C}_{33}\text{H}_{29}\text{O}_5\text{ClNa}$  ( $\text{M} + \text{Na}^+$ ): 563.1601, found: 563.1596. (Yellow oil, 23.4 mg, 78%

isolated yield)

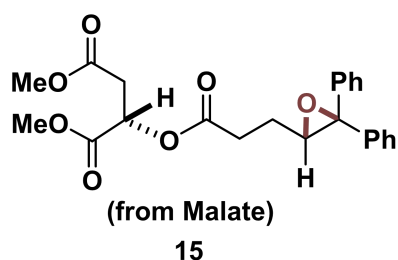

**dimethyl 2-((3-(3,3-diphenyloxiran-2-yl)propanoyl)oxy)succinate (15):**  $^1\text{H}$  NMR (400 MHz,  $\text{CDCl}_3$ )  $\delta$  7.41-7.35 (m, 5H), 7.33-7.27 (m, 5H), 5.50-5.44 (m, 1H), 3.74-3.73 (d,  $J = 2.4$  Hz, 3H), 3.68-3.67 (d,  $J = 5.2$  Hz, 3H), 3.52-3.48 (m, 1H), 2.89-2.87 (m, 2H), 2.59-2.53 (m, 2H), 1.93-1.84 (m, 1H), 1.56-1.50 (m, 1H);  $^{13}\text{C}$  NMR (100 MHz,  $\text{CDCl}_3$ )  $\delta$  171.9, 169.7, 169.4, 140.8, 137.2, 128.5, 128.4, 128.0, 127.8, 127.1, 125.9, 82.5, 68.3, 65.0, 52.8, 52.3, 35.9, 30.5, 25.1; HRMS calculated for  $\text{C}_{23}\text{H}_{24}\text{O}_7\text{Na}$  ( $\text{M} + \text{Na}^+$ ): 435.1420, found: 435.1414. (Yellow oil, 27.5 mg, 88% isolated yield)

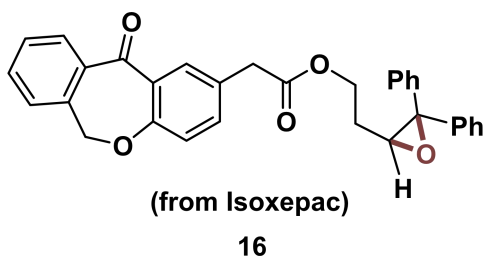

**2-(3,3-diphenyloxiran-2-yl)ethyl 2-(11-oxo-6,11-dihydrodibenzo[*b,e*]oxepin-3-yl)acetate (16):**  $^1\text{H}$  NMR (400 MHz,  $\text{CDCl}_3$ )  $\delta$  8.12-8.11 (d,  $J = 2.4$  Hz, 1H), 7.88-7.86 (dd,  $J_1 = 1.2$  Hz,  $J_2 = 8.0$  Hz, 1H), 7.72-7.69 (m, 2H), 7.57-7.54 (m, 1H), 7.49-7.47 (m, 1H), 7.43-7.41 (dd,  $J_1 = 2.0$  Hz,  $J_2 = 8.0$  Hz, 1H), 7.38-7.36 (m, 4H), 7.33-7.31 (m, 2H), 7.29-7.28 (m, 2H), 7.13-7.09 (m, 2H), 7.03-7.00 (d,  $J = 8.8$  Hz, 1H), 5.16 (s, 2H), 4.26-4.22 (m, 2H), 3.65 (s, 2H), 3.49-3.46 (m, 1H), 1.86-1.85 (m, 2H);  $^{13}\text{C}$  NMR (100 MHz,  $\text{CDCl}_3$ )  $\delta$  190.9, 171.4, 160.6, 140.6, 137.6, 137.2, 136.4, 135.6, 132.9, 132.6, 130.3, 129.6, 129.4, 128.4, 128.3, 128.0, 127.9, 127.8, 127.7, 127.6, 127.1, 121.2, 73.7,



66.2, 63.3, 62.2, 40.3, 29.1, 1.125; HRMS calculated for  $C_{32}H_{26}O_5Na$  ( $M + Na^+$ ): 513.1678, found: 513.1673. (Colourless oil, 25.7 mg, 83% isolated yield)

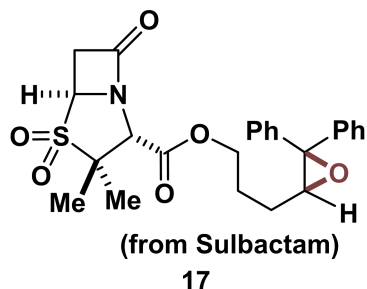

**2-(3,3-diphenyloxiran-2-yl)propyl 3,3-dimethyl-7-oxo-4-thia-1-azabicyclo[3.2.0]**

**heptane-2-carboxylate 4,4-dioxide (17):**  $^1H$  NMR (400 MHz,  $CDCl_3$ )  $\delta$  7.39-7.38 (t, 4H), 7.32-7.30 (m, 6H), 4.54-4.52 (m, 1H), 4.31-4.28 (d,  $J = 12.0$  Hz, 1H), 4.24-4.18 (m, 2H), 3.45-3.42 (m, 2H), 3.40-3.38 (m, 1H), 1.91-1.85 (m, 2H), 1.67-1.62 (m, 1H), 1.48-1.45 (d,  $J = 13.2$  Hz, 3H), 1.35-1.31 (d,  $J = 16.0$  Hz, 3H), 1.28-1.25 (m, 1H);  $^{13}C$  NMR (100 MHz,  $CDCl_3$ )  $\delta$  170.8, 167.0, 140.7, 137.2, 128.5, 128.4, 128.0, 127.9, 127.0, 126.9, 66.1, 38.4, 26.6, 25.6, 20.4, 18.6. HRMS calculated for  $C_{25}H_{27}O_6NNaS$  ( $M + Na^+$ ): 492.1457, found: 492.1451. (Yellow oil, 21.4 mg, 69% isolated yield)

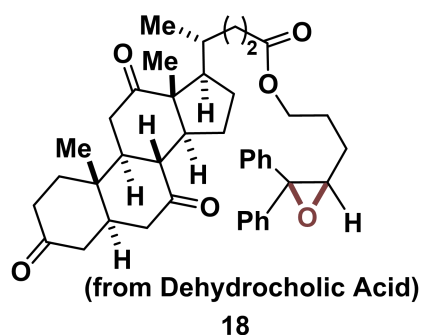

**3-(3,3-diphenyloxiran-2-yl)propyl 14-(10,13-dimethyl-3,7,12-trioxohexadecahydro-1H-cyclopenta[*a*]phenanthren-17-yl)pentanoate :**  $^1H$  NMR (400 MHz,  $CDCl_3$ )  $\delta$  7.41-7.37 (m, 4H), 7.34-7.28 (m, 6H), 4.10-4.00 (m, 2H), 3.44-3.41 (m, 1H), 2.96-2.82 (m, 4H), 2.38-2.24 (m, 6H), 2.21-2.12 (m, 4H), 2.06-1.95 (m, 4H), 1.87-1.76 (m, 4H),

1.40 (s, 3H), 1.37-1.24 (m, 6H), 1.06 (s, 3H), 0.83-0.82 (d,  $J = 4.0$  Hz, 3H);  $^{13}\text{C}$  NMR (100 MHz,  $\text{CDCl}_3$ )  $\delta$  212.1, 209.2, 208.9, 174.1, 140.9, 137.4, 128.4, 128.3, 128.0, 127.9, 127.8, 127.1, 66.4, 66.0, 63.8, 57.0, 51.8, 49.1, 46.9, 45.7, 45.6, 45.1, 42.9, 38.7, 36.6, 36.1, 35.6, 35.4, 31.5, 30.4, 27.7, 26.3, 25.5, 25.2, 22.0, 18.7, 11.9; HRMS calculated for  $\text{C}_{41}\text{H}_{50}\text{O}_6\text{Na}$  ( $\text{M} + \text{Na}^+$ ): 661.3505, found: 661.3500. (Yellow oil, 12.6 mg, 41% isolated yield)

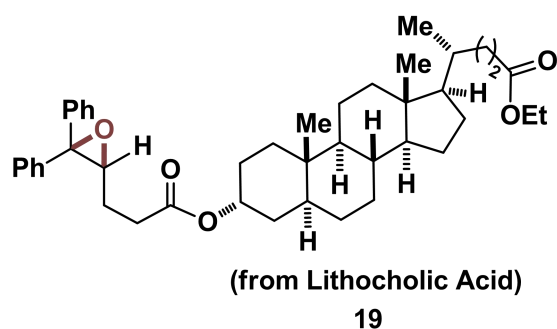

**Ethyl 4-(2-((3-(3,3-diphenyloxiran-2-yl)propanoyl)oxy)-10,13-dimethylhexadeca-hydro-1H-cyclopenta[a]phenanthren-17-yl)pentanoate (19):**  $^1\text{H}$  NMR (400 MHz,  $\text{CDCl}_3$ )  $\delta$  7.42-7.36 (m, 4H), 7.35-7.28 (m, 6H), 4.74-4.68 (m, 1H), 4.15-4.09 (m, 2H), 3.50-3.47 (m, 1H), 2.45-2.41 (t,  $J = 7.2$  Hz, 2H), 2.38-2.30 (m, 1H), 2.24-2.17 (m, 1H), 1.98-1.95 (d,  $J = 12.0$  Hz, 1H), 1.87-1.75 (m, 6H), 1.68-1.62 (m, 1H), 1.56-1.51 (m, 2H), 1.47-1.33 (m, 8H), 1.29-1.24 (m, 6H), 1.21-0.97 (m, 7H), 0.94-0.88 (m, 6H), 0.64 (s, 3H);  $^{13}\text{C}$  NMR (100 MHz,  $\text{CDCl}_3$ )  $\delta$  174.5, 172.4, 140.9, 137.3, 128.4, 128.3, 128.0, 127.9, 127.8, 127.1, 74.7, 66.6, 65.4, 60.3, 56.6, 56.1, 42.8, 42.0, 40.5, 40.2, 35.9, 35.5, 35.1, 34.7, 31.4, 31.1, 28.3, 27.1, 26.7, 26.4, 25.2, 24.3, 23.4, 20.9, 18.4, 14.4, 12.1. HRMS calculated for  $\text{C}_{43}\text{H}_{58}\text{O}_5\text{Na}$  ( $\text{M} + \text{Na}^+$ ): 677.4182, found: 677.4177. ( Colourless oil, 20.9 mg, 68% isolated )

## UV-Vis absorption experiments

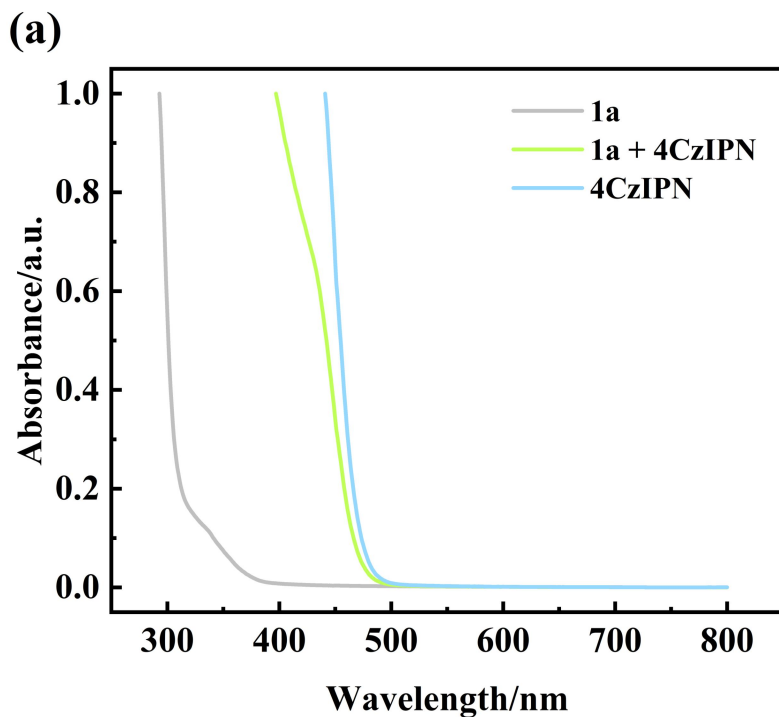

Figure 1. UV-Vis absorption spectra of the individual reaction components and the reaction mixtures

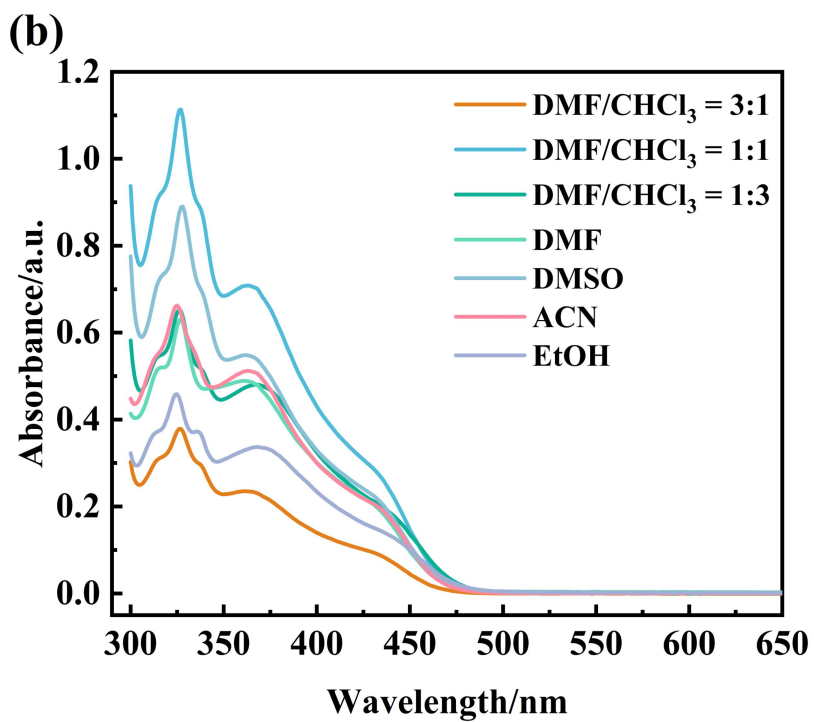

Figure 2. UV-Vis absorption spectra of 4CzIPN in different solvents.

### Transient fluorescence spectroscopy

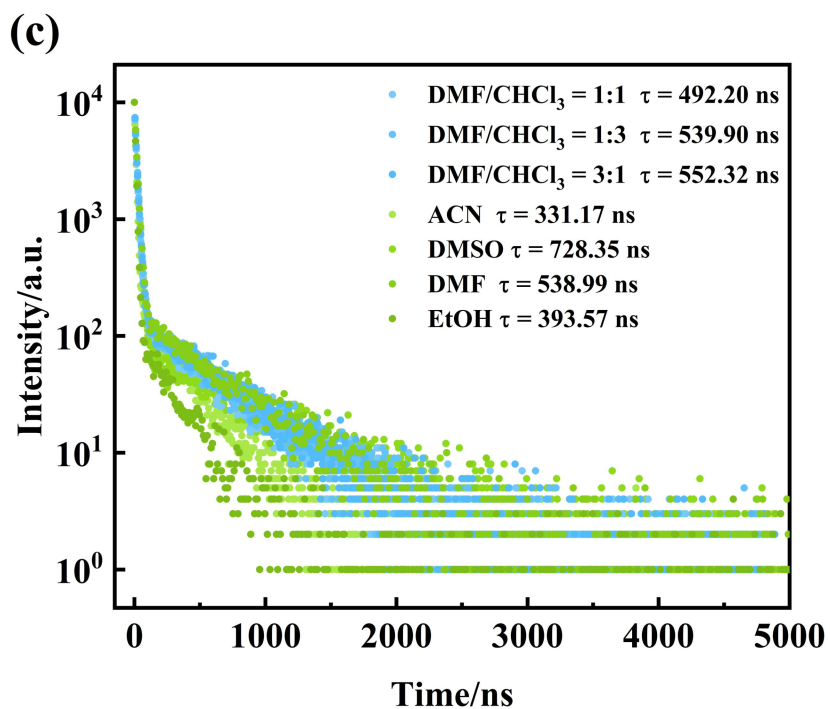

Figure 3. Transient fluorescence spectra of 4CzIPN in different solvents

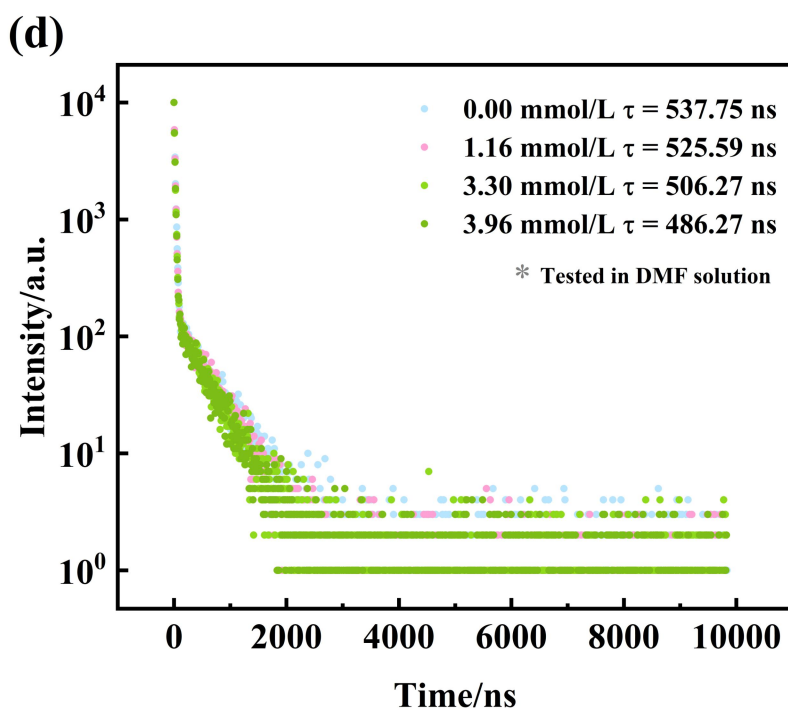

Figure 4. Transient fluorescence spectra of 4CzIPN at different concentrations of 1a

## Fluorescence quenching experiments

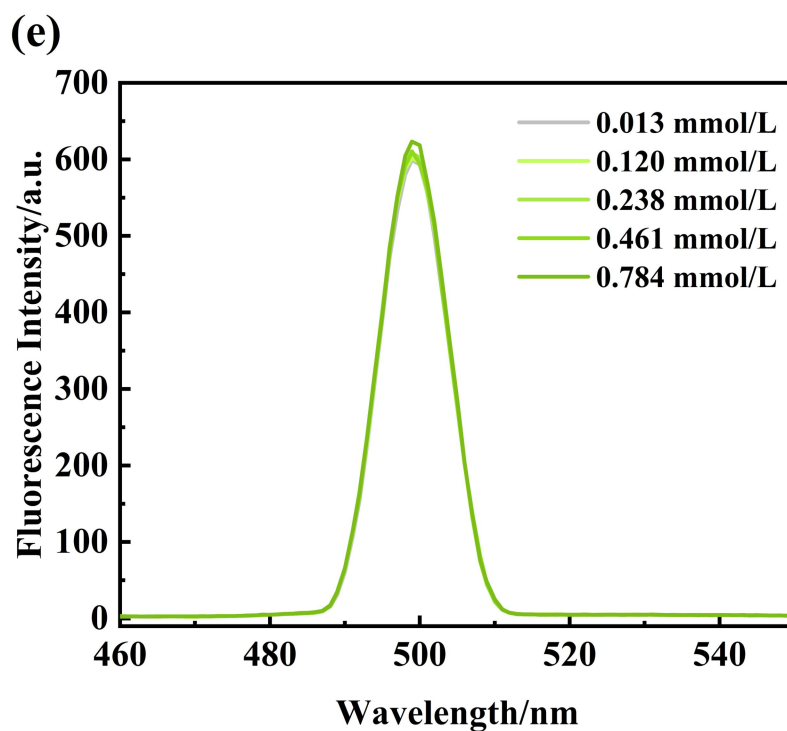

Figure 5. Fluorescence spectra of 4CzIPN with different concentrations of 1a

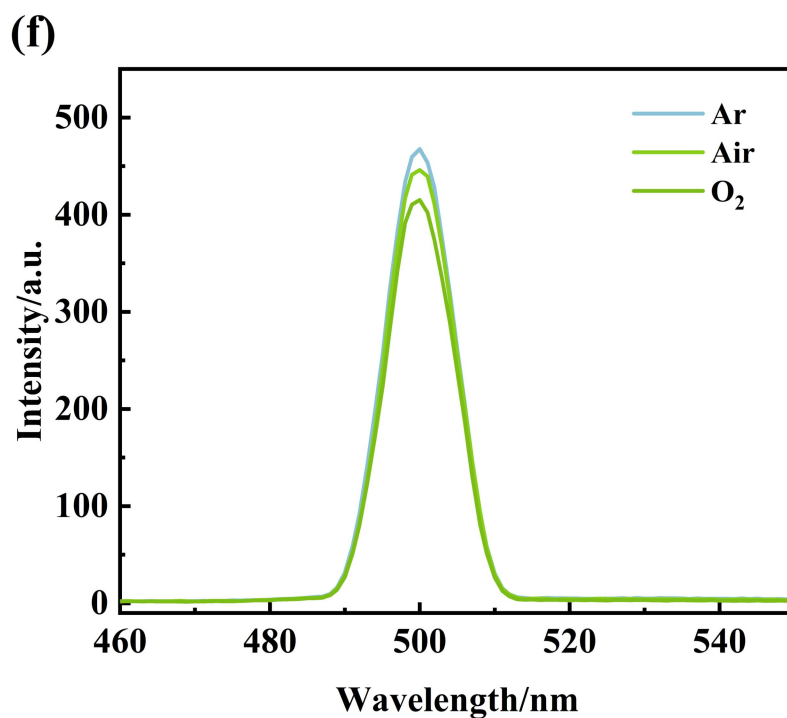

Figure 6. Fluorescence spectra of 4CzIPN with different concentrations of O<sub>2</sub>

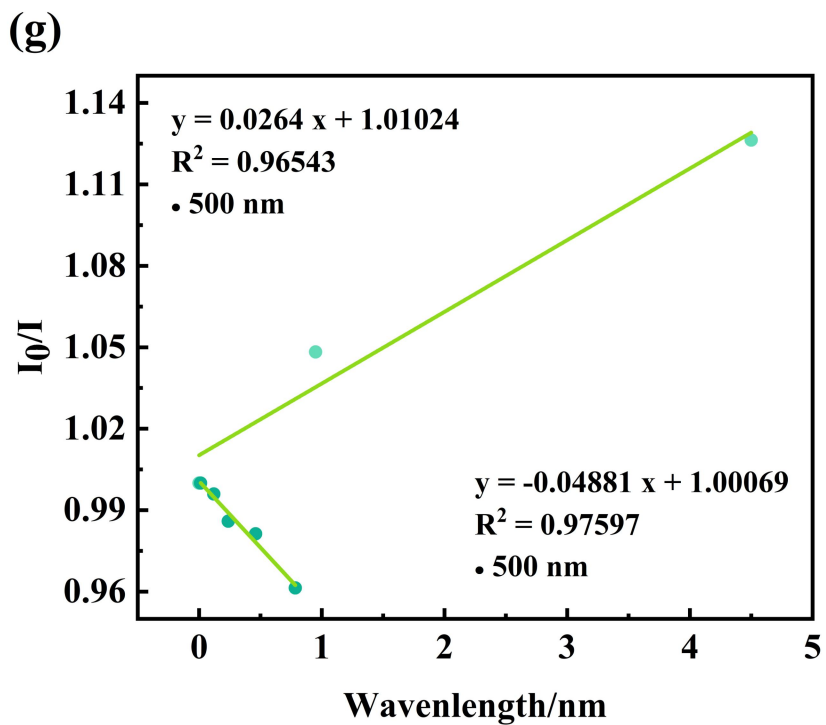

Figure 7. Stern Volmer plots of the substrate 1a and O<sub>2</sub>

### EPR experiments

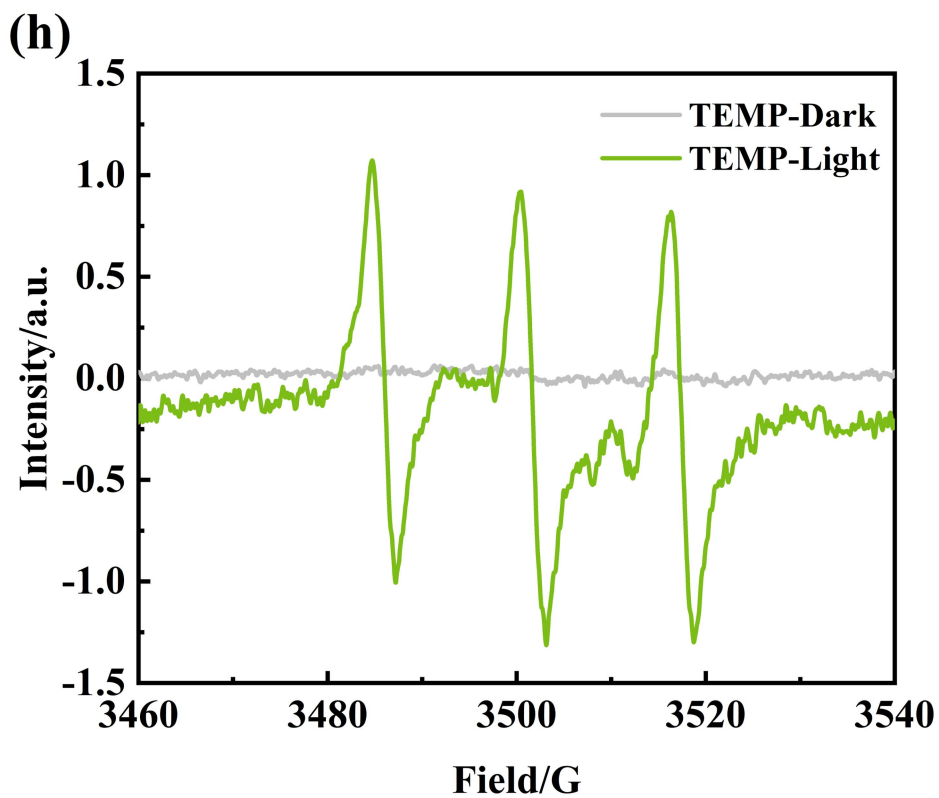

Figure 8. EPR experiments on reaction of 1a by adding TEMP

### CV curve of the substrate 1a

Cyclic voltammetry (CV) was performed using an Epsilon electrochemical workstation (a BASi three-electrode cell system): glassy carbon electrode as the working electrode, Pt wire as the counter electrode, Ag/AgCl (KCl, 3 M) electrode as the reference electrode, and ferrocenium/ferrocene ( $\text{Fc}^+/\text{Fc}$ ) as the internal standard. Scan rate:  $100 \text{ mV s}^{-1}$  (in the range  $-0.78$  to  $+2.39 \text{ V}$ ).  $n\text{Bu}_4\text{NPF}_6$  (0.1 M MeCN) was used as the supporting electrolyte.

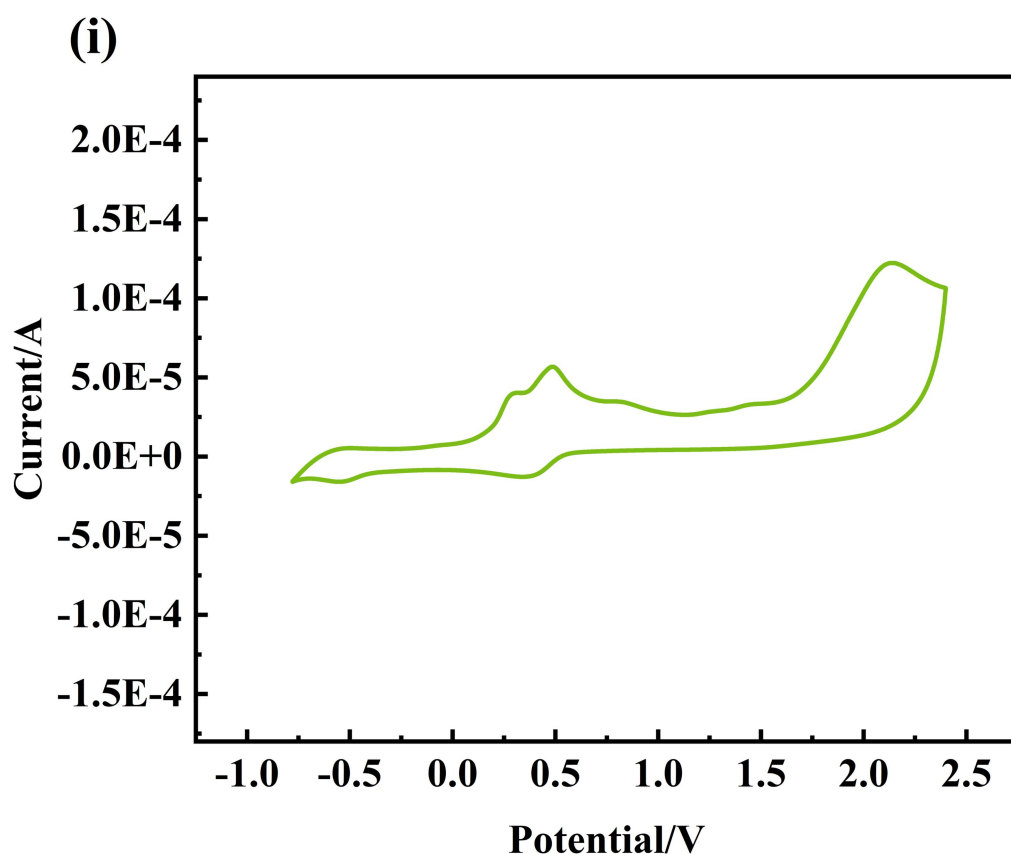

Figure 9. Cyclic voltammetry of the substrate 1a

# Copies of $^1\text{H}$ NMR, $^{13}\text{C}$ NMR and $^{19}\text{F}$ NMR spectra

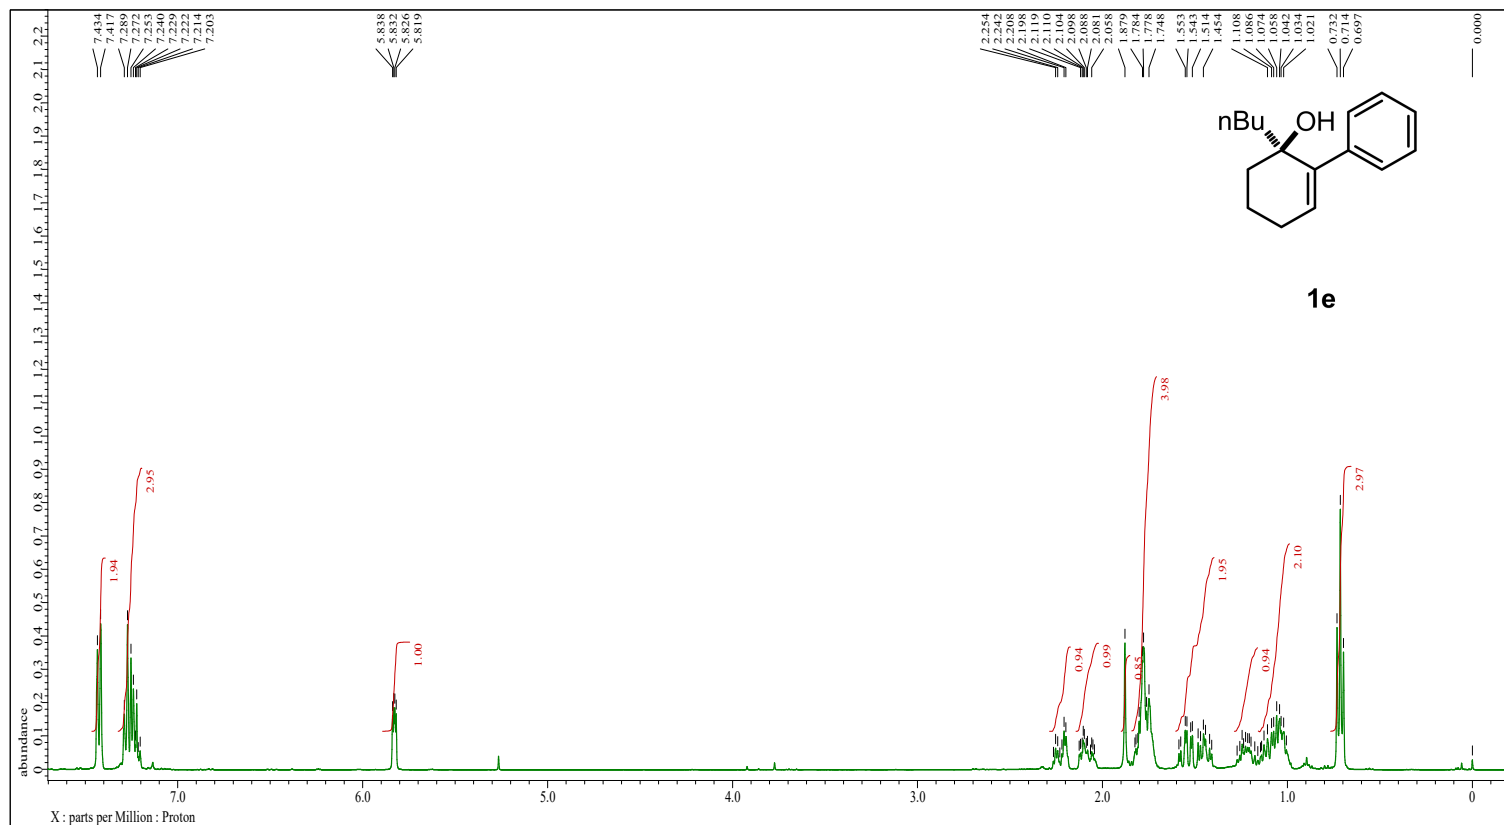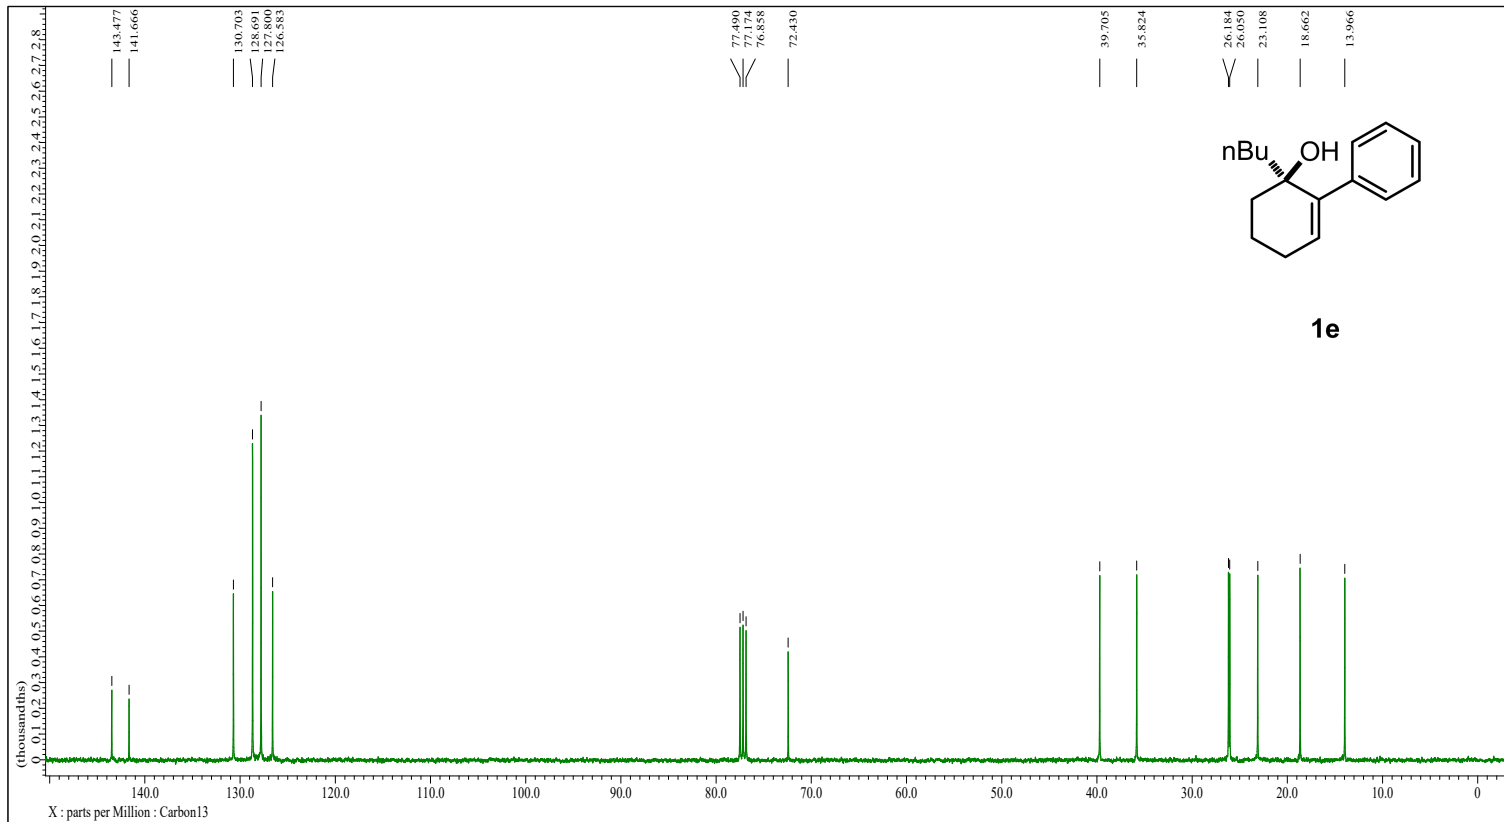



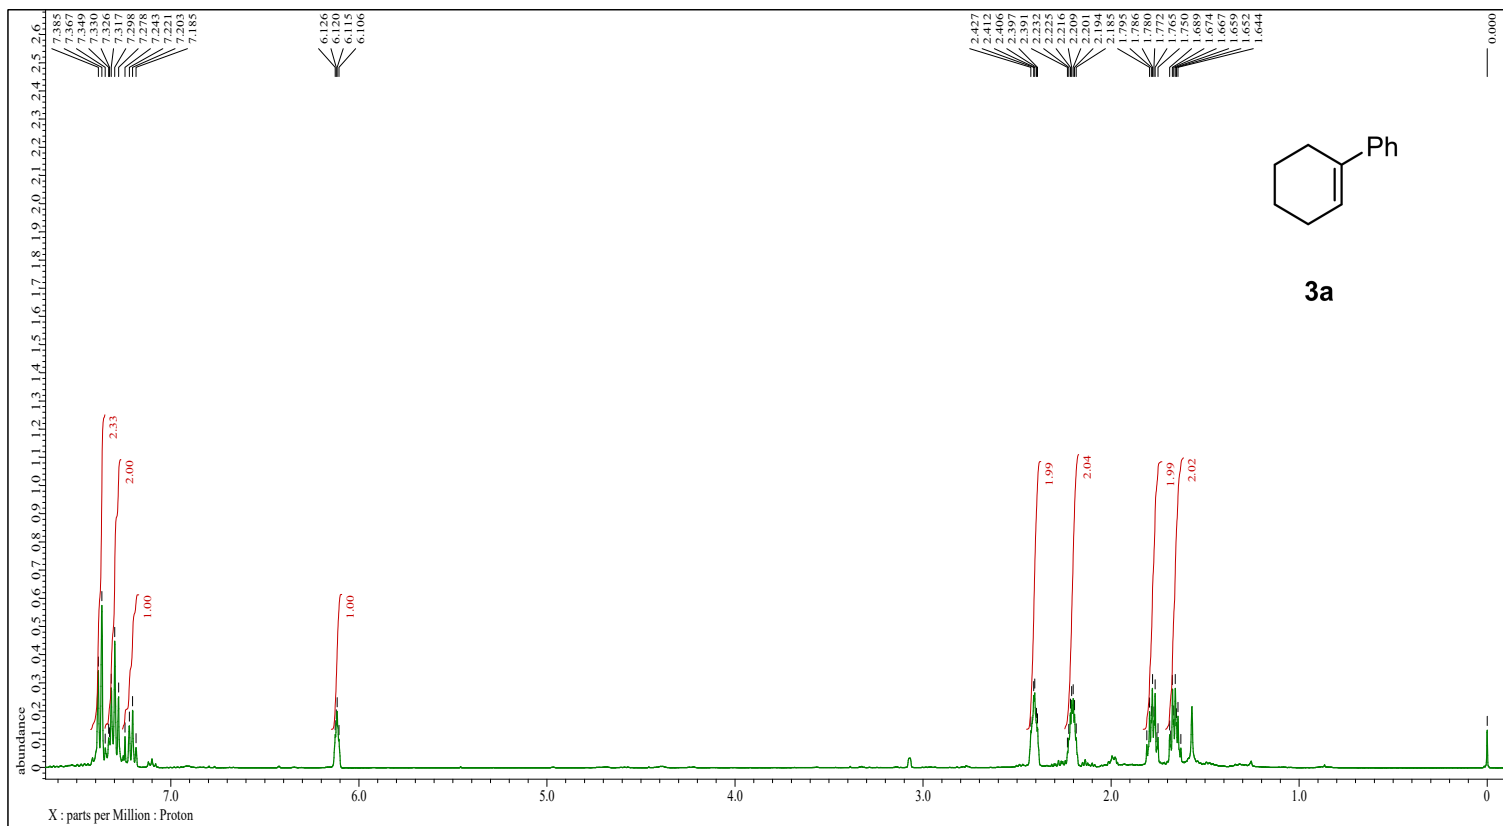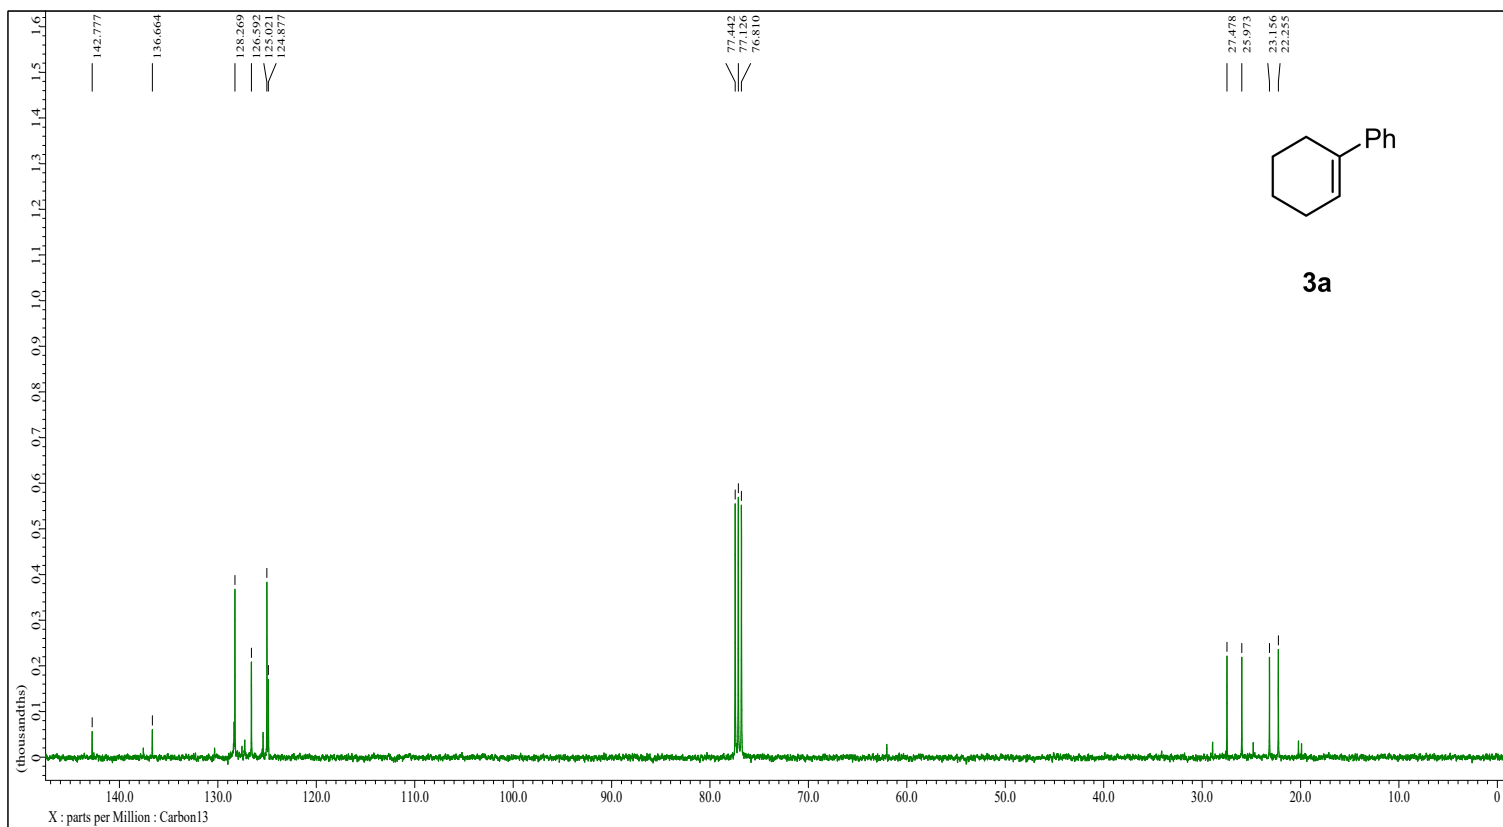

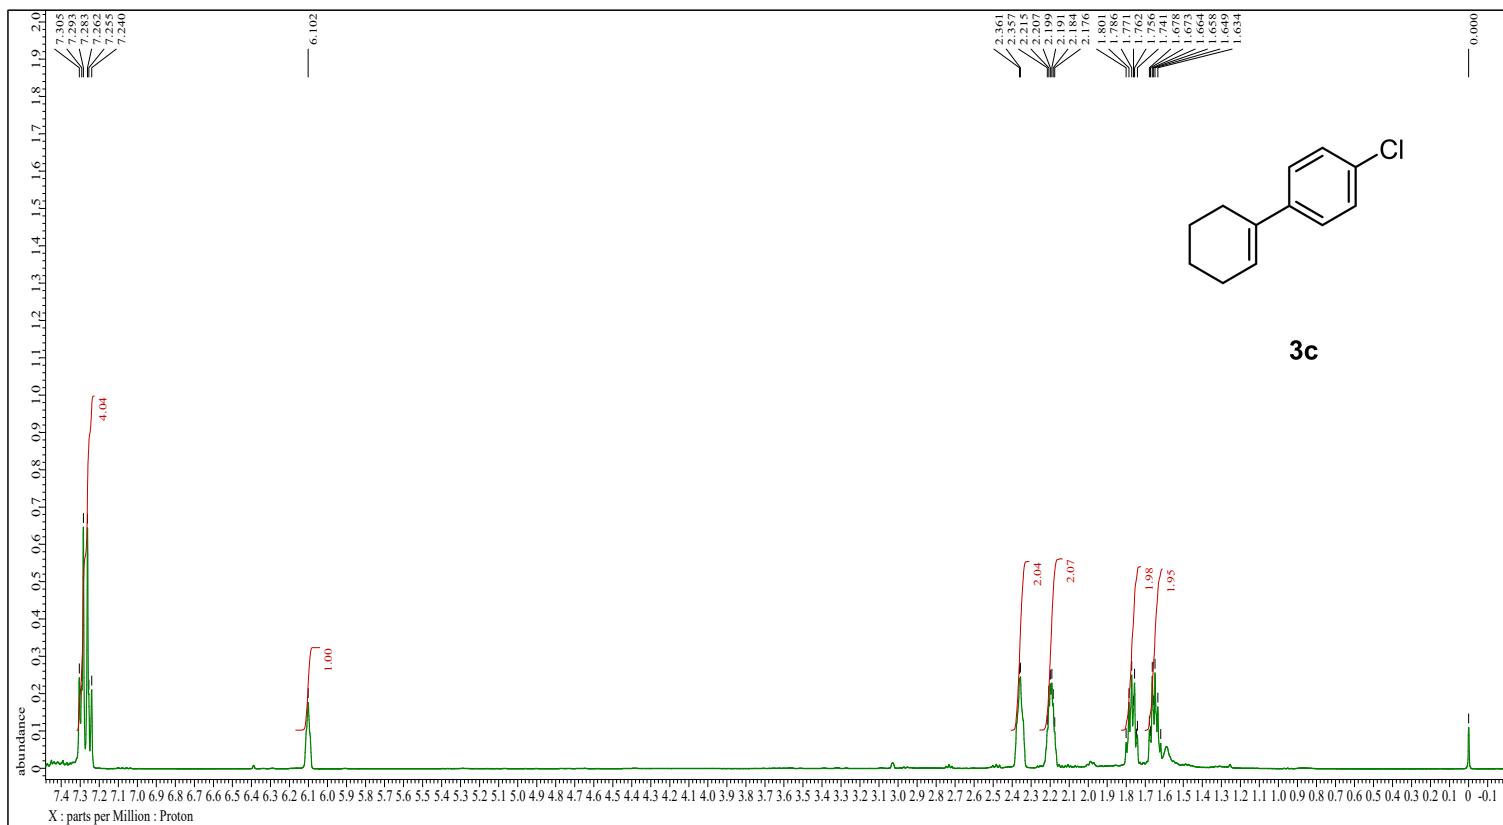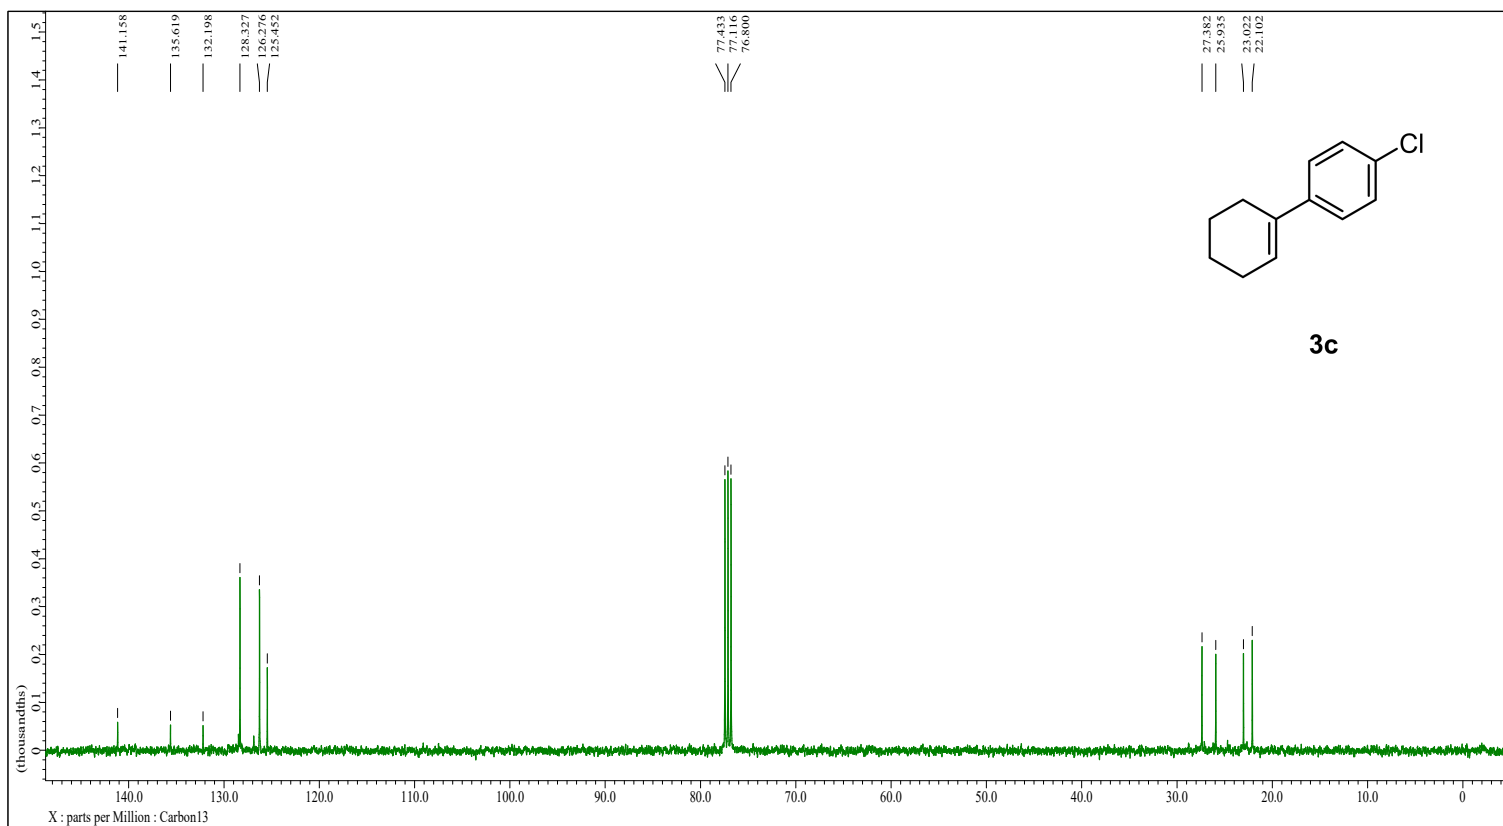

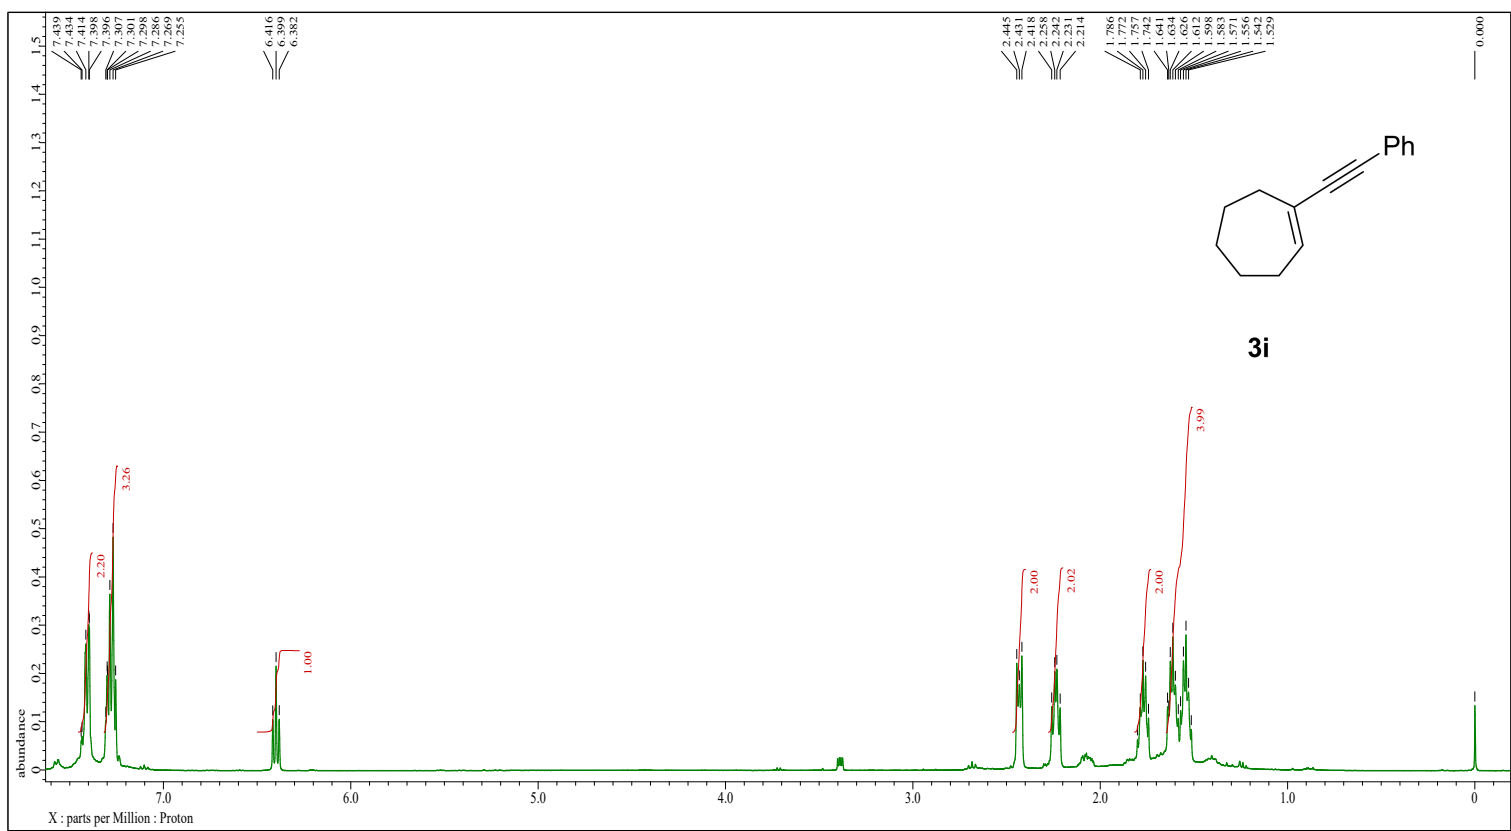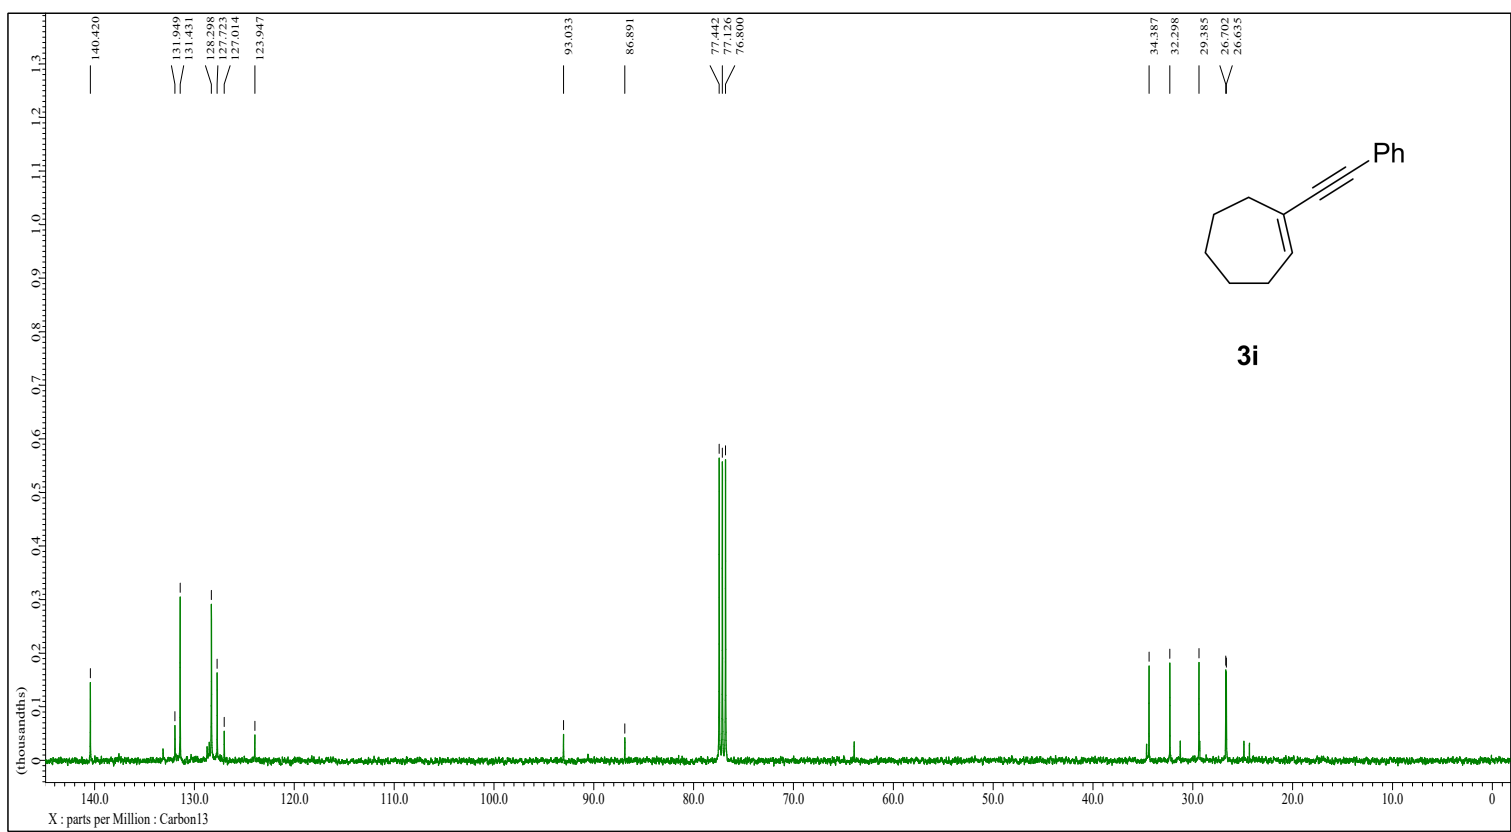

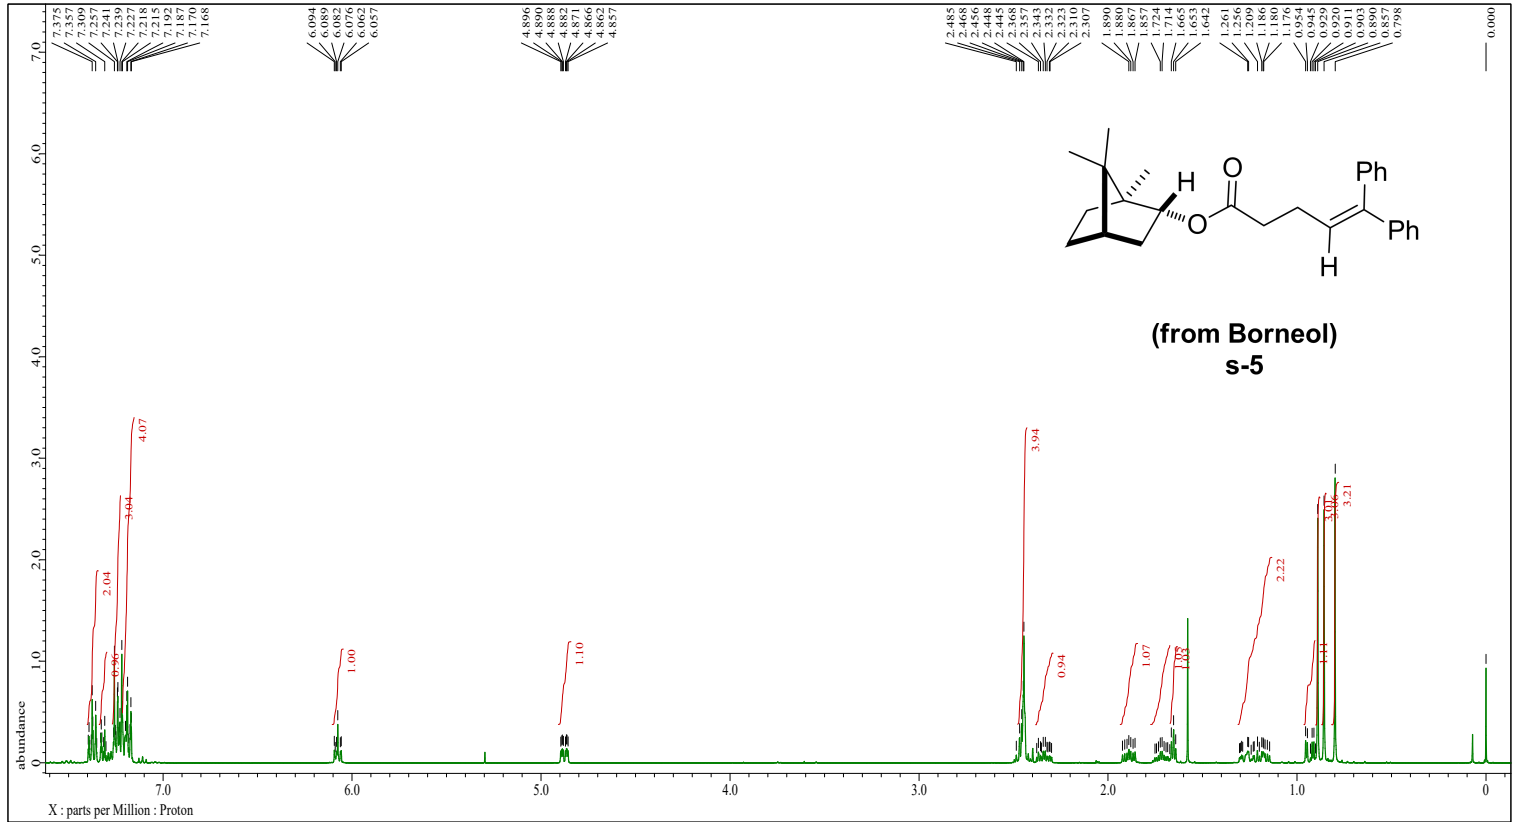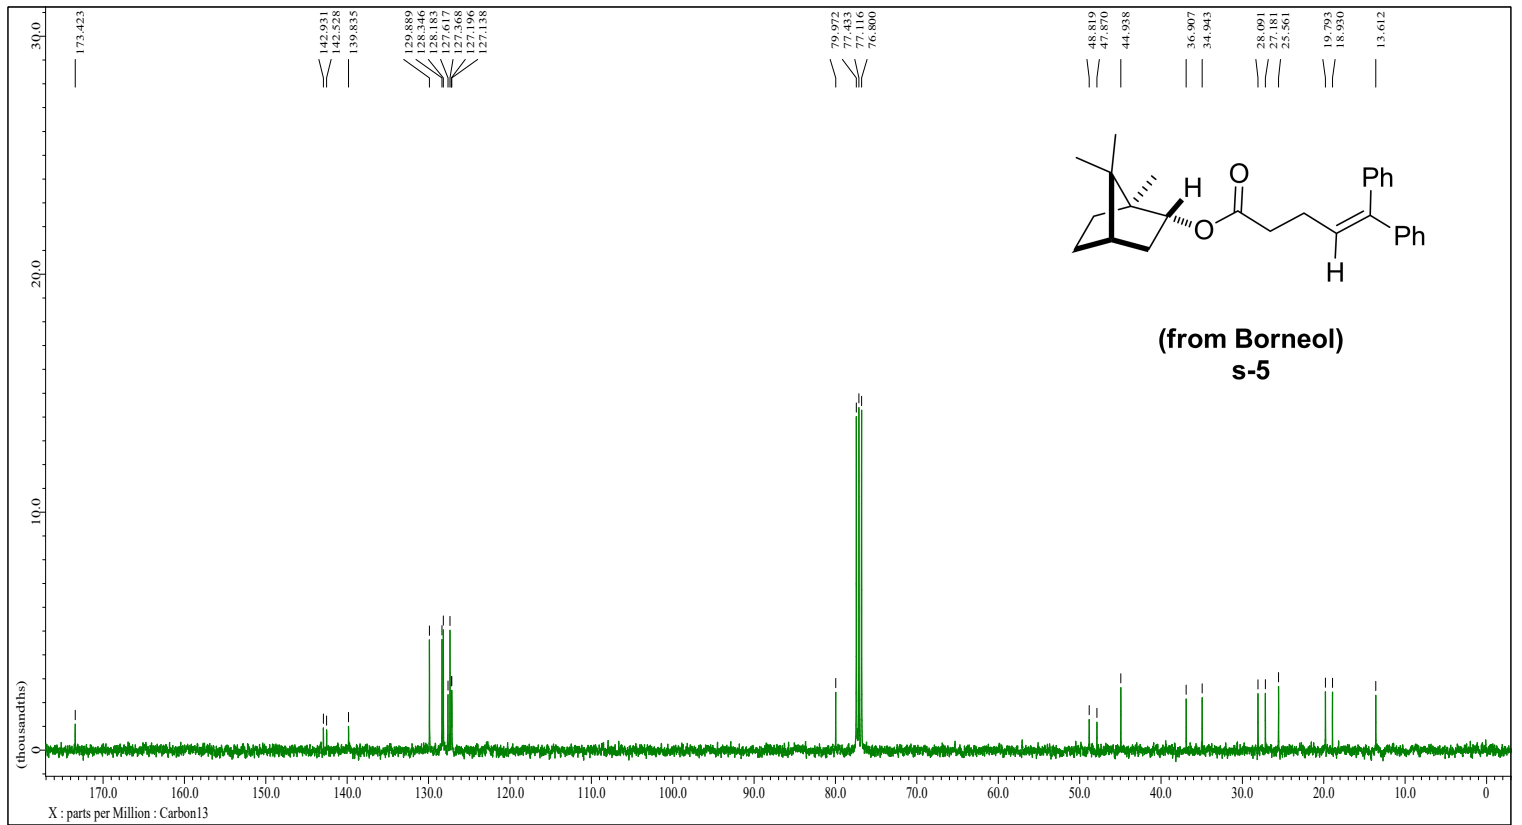

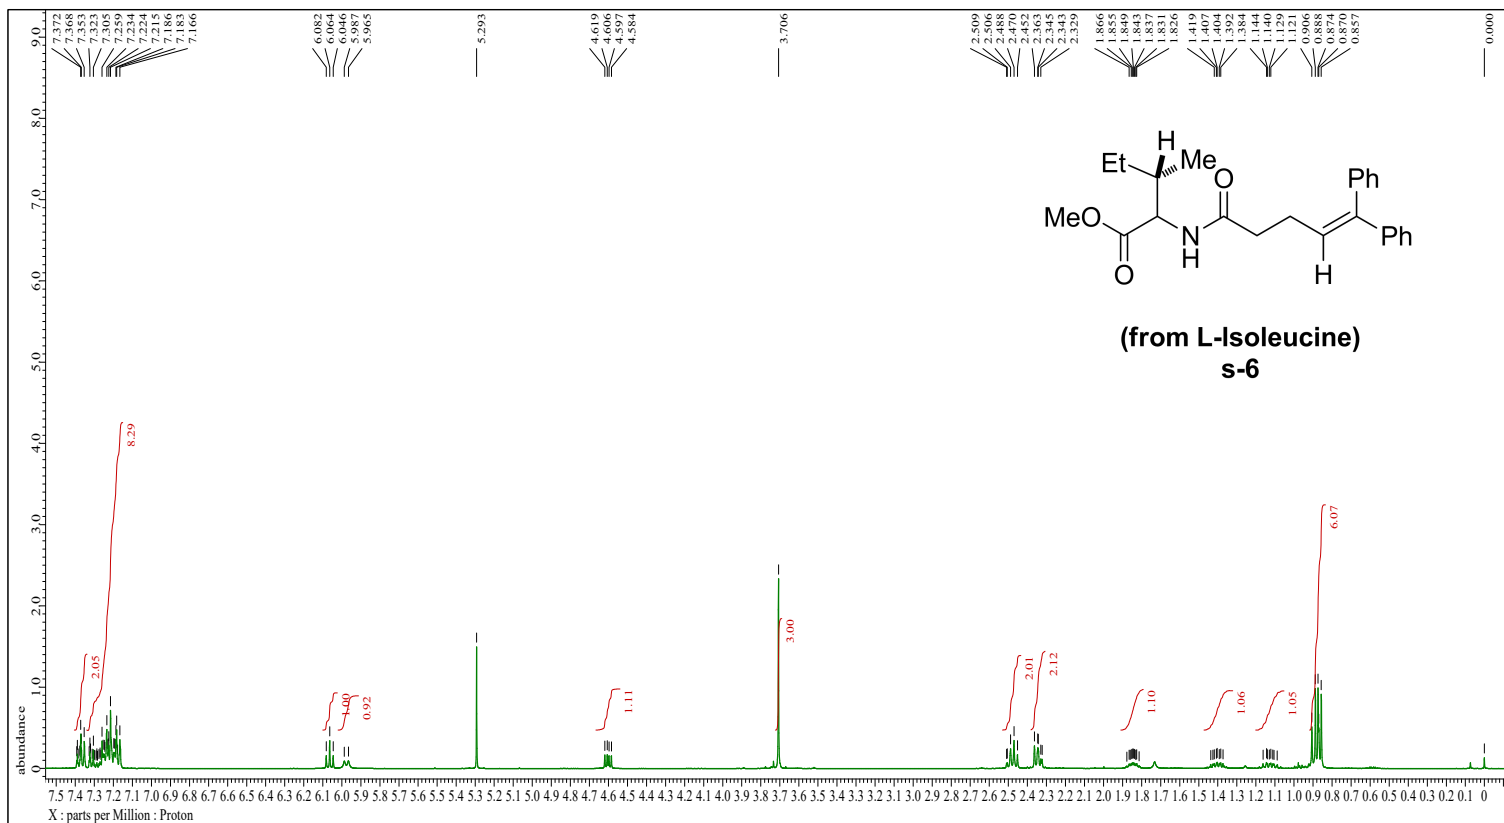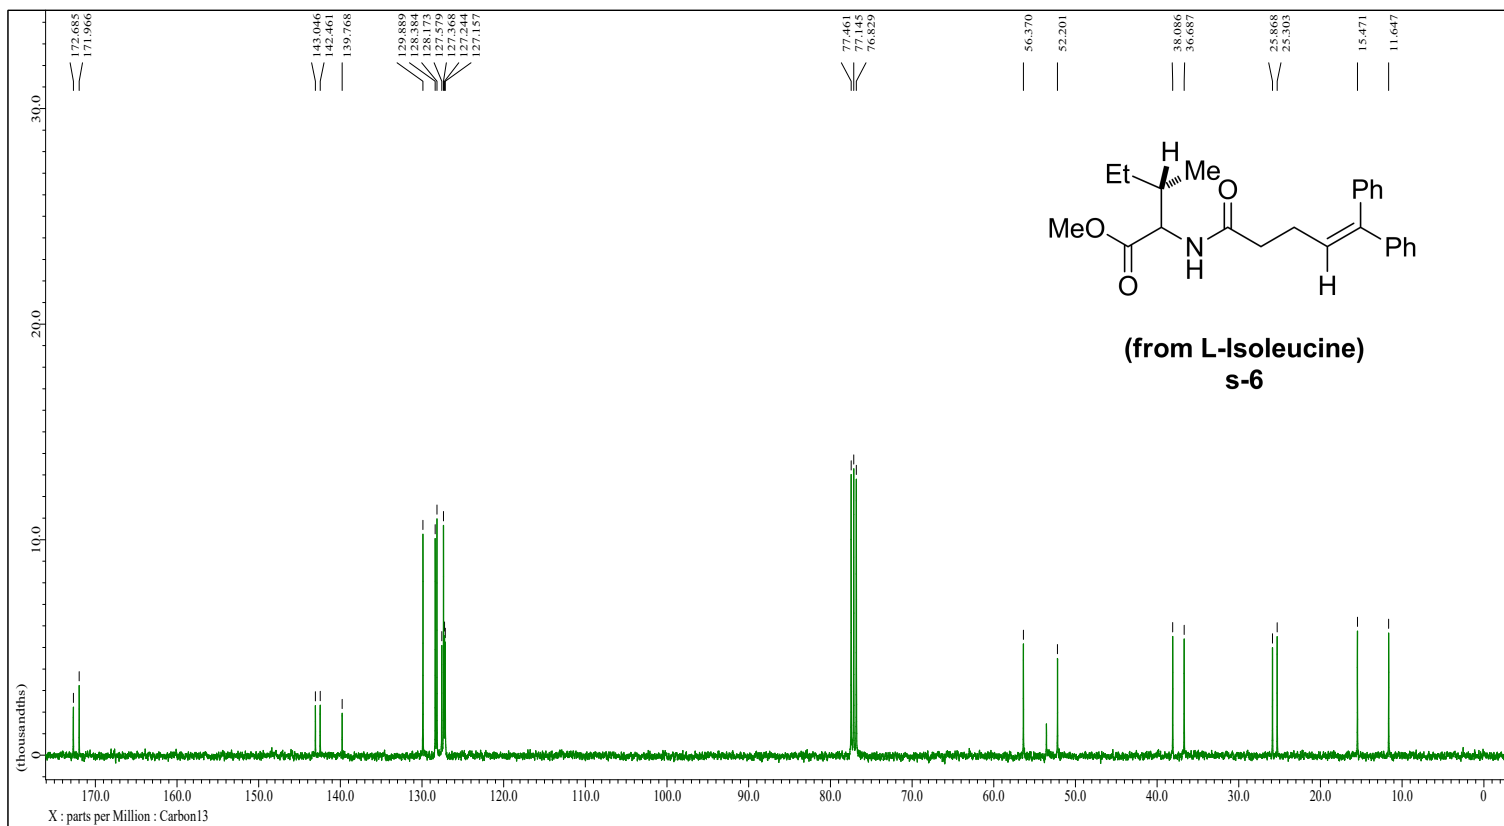

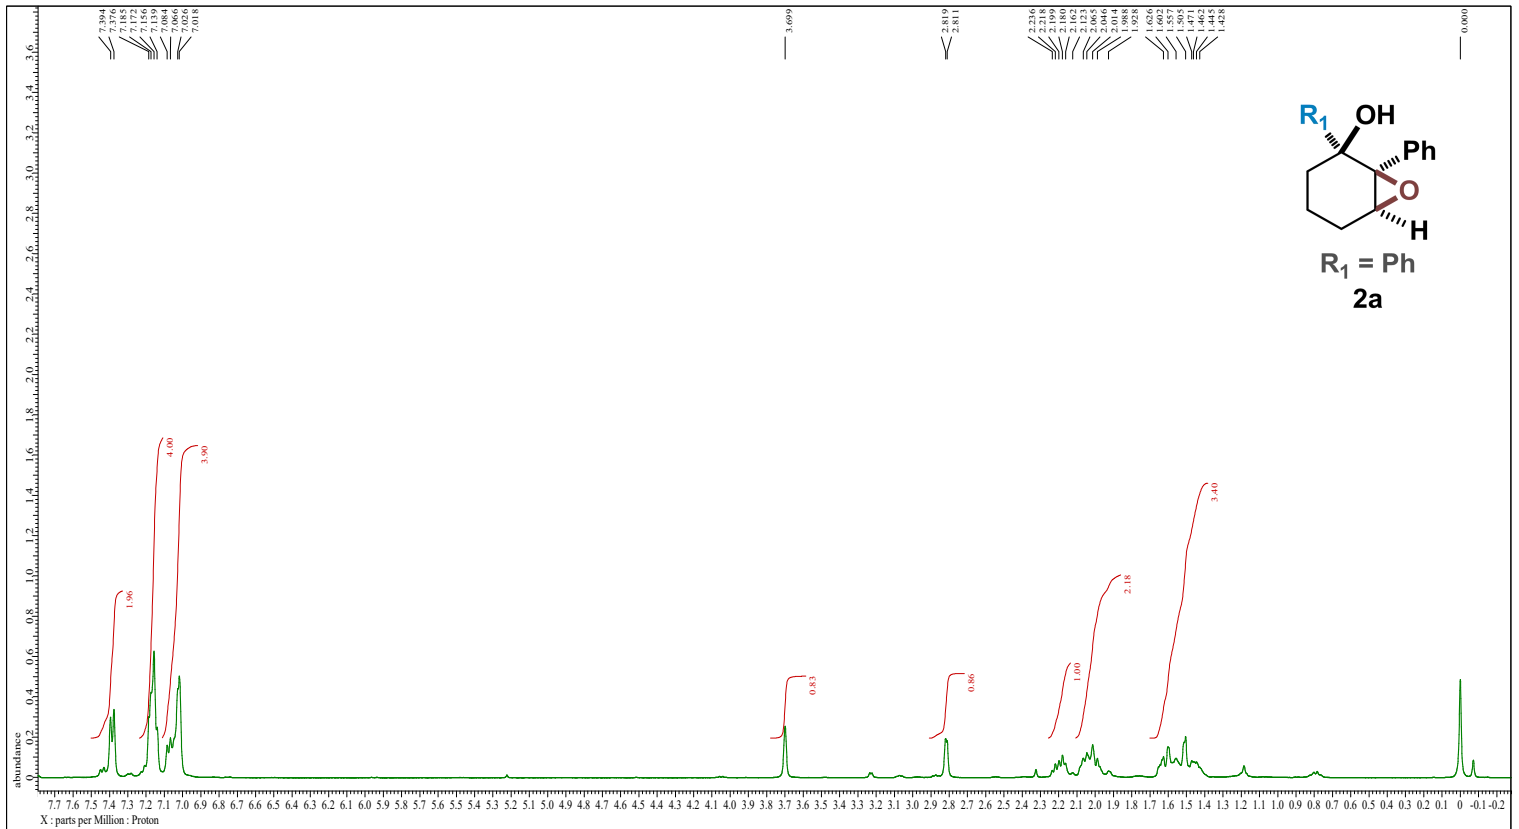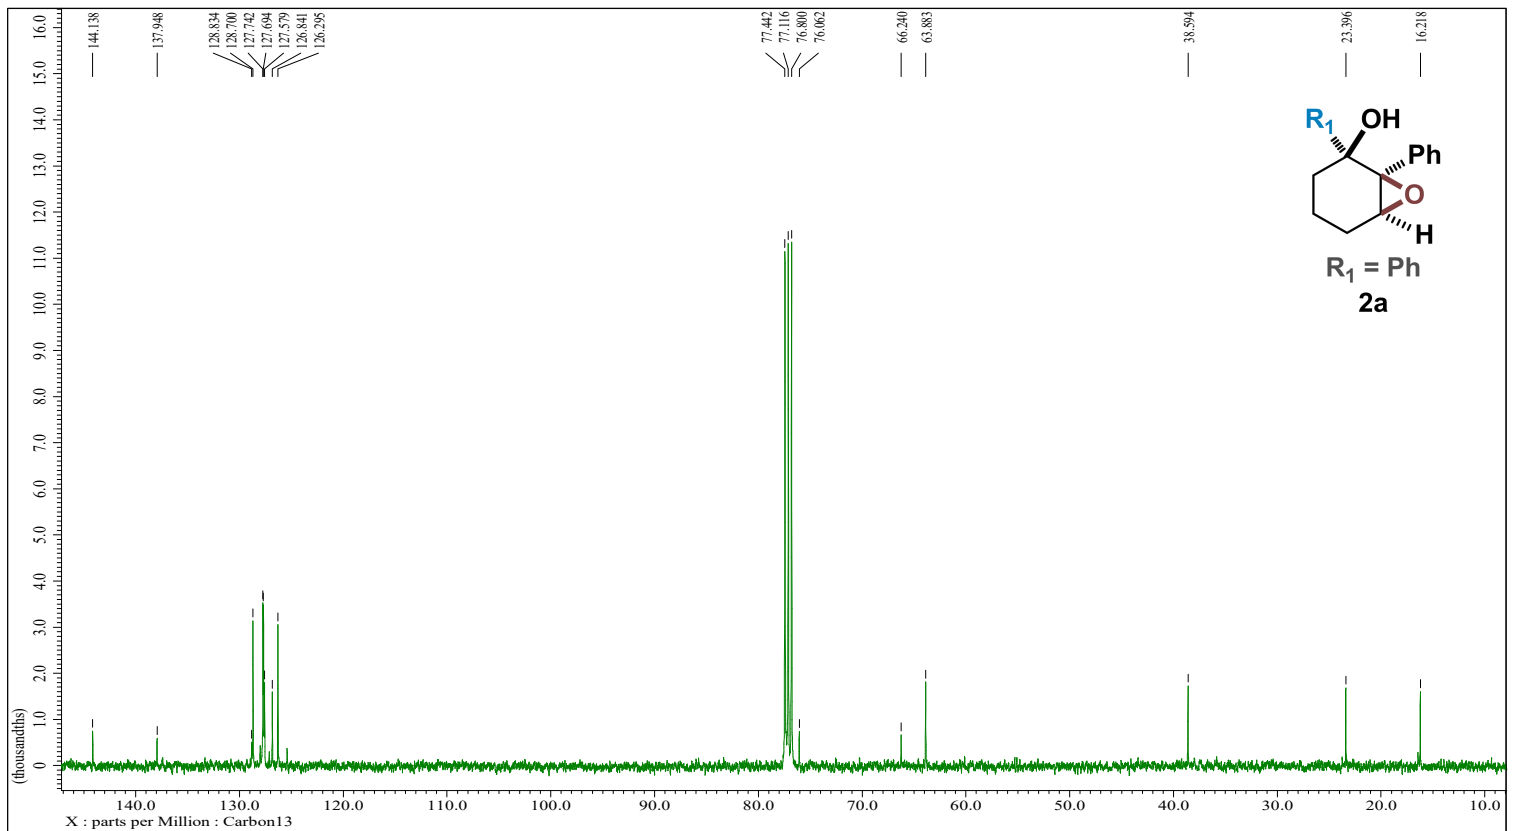

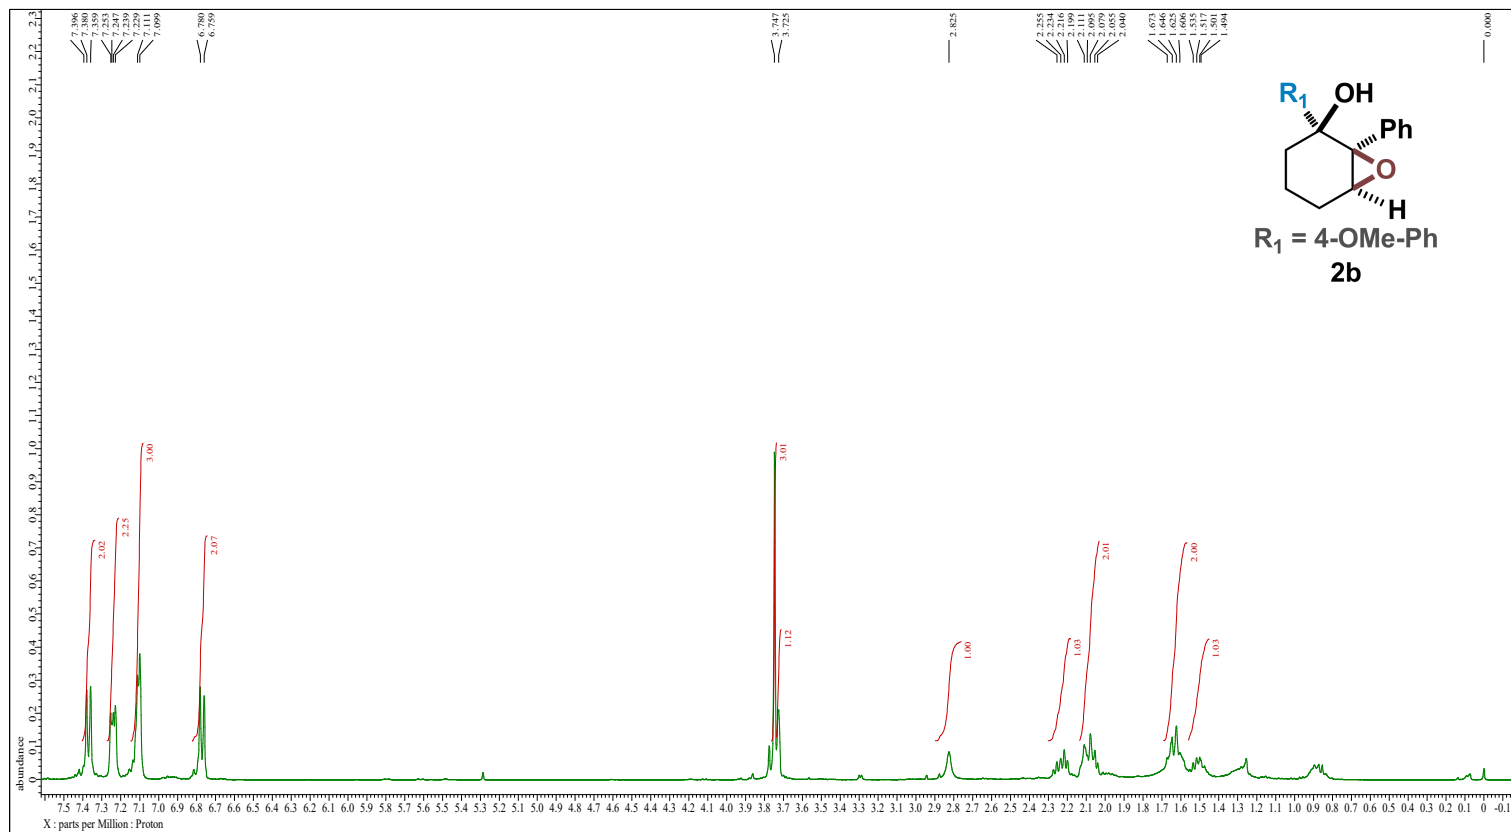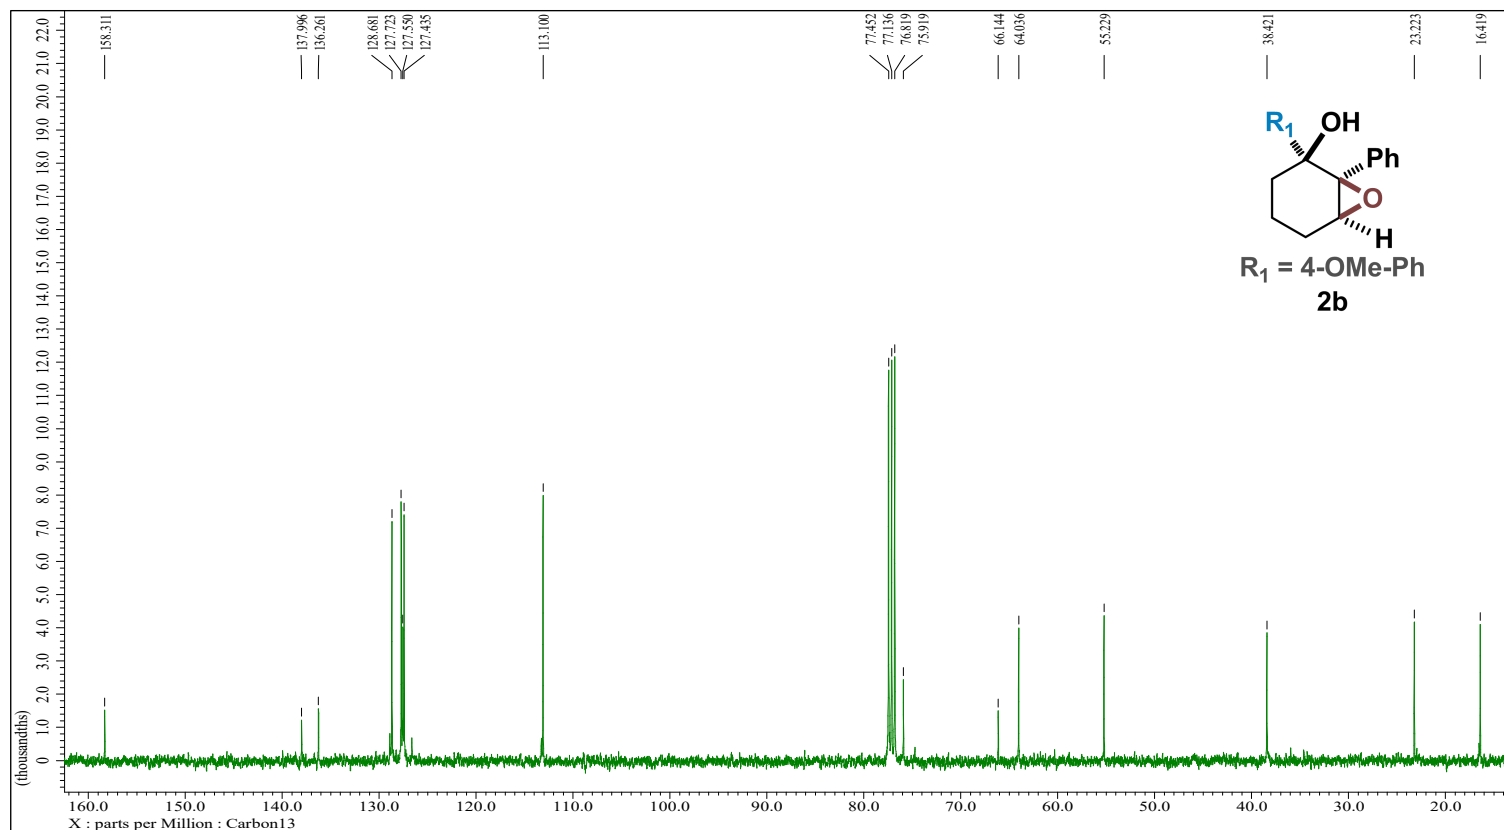

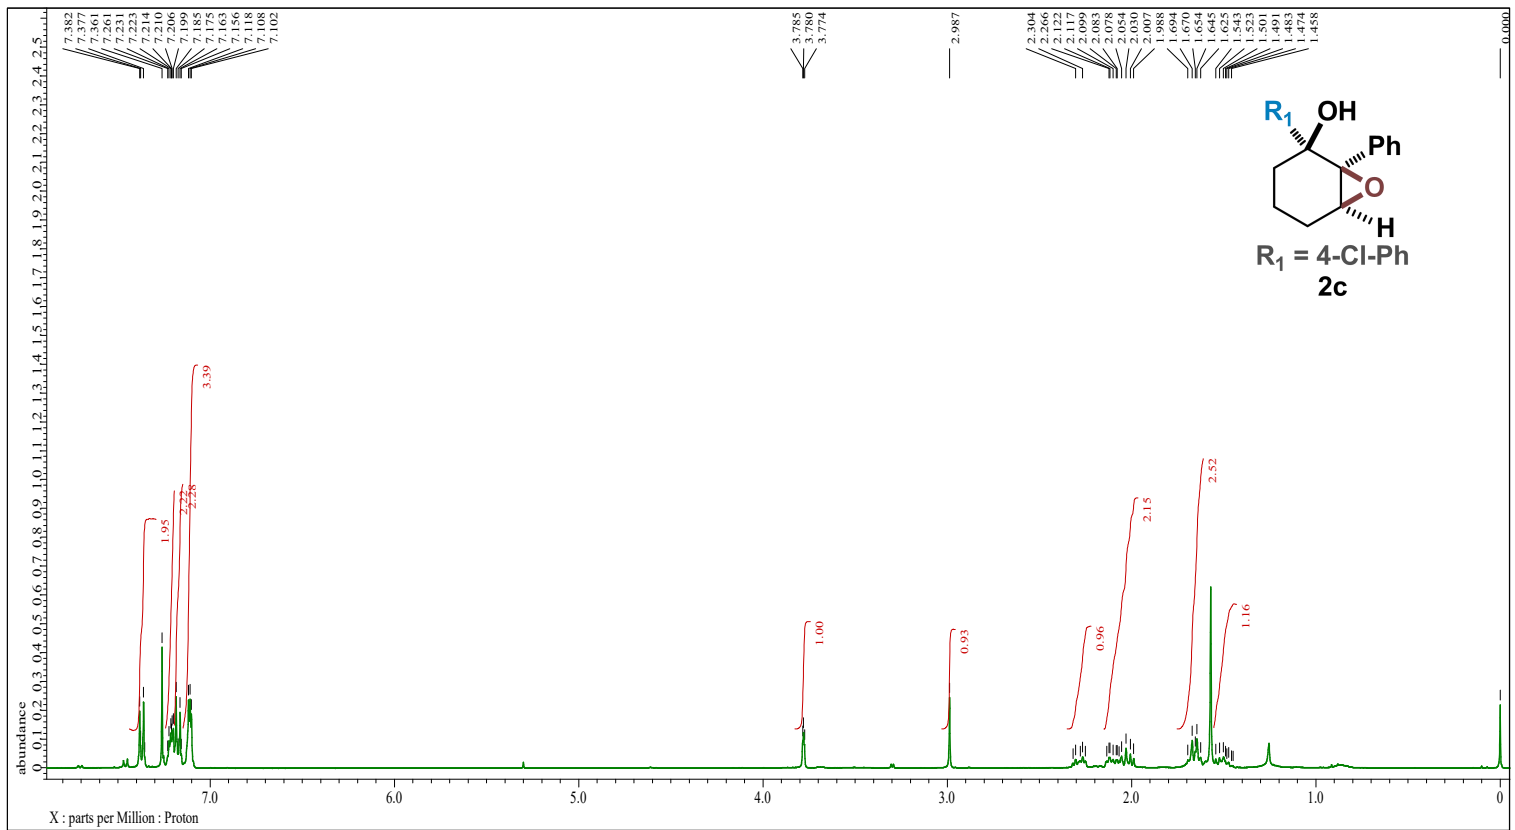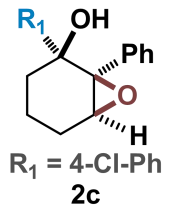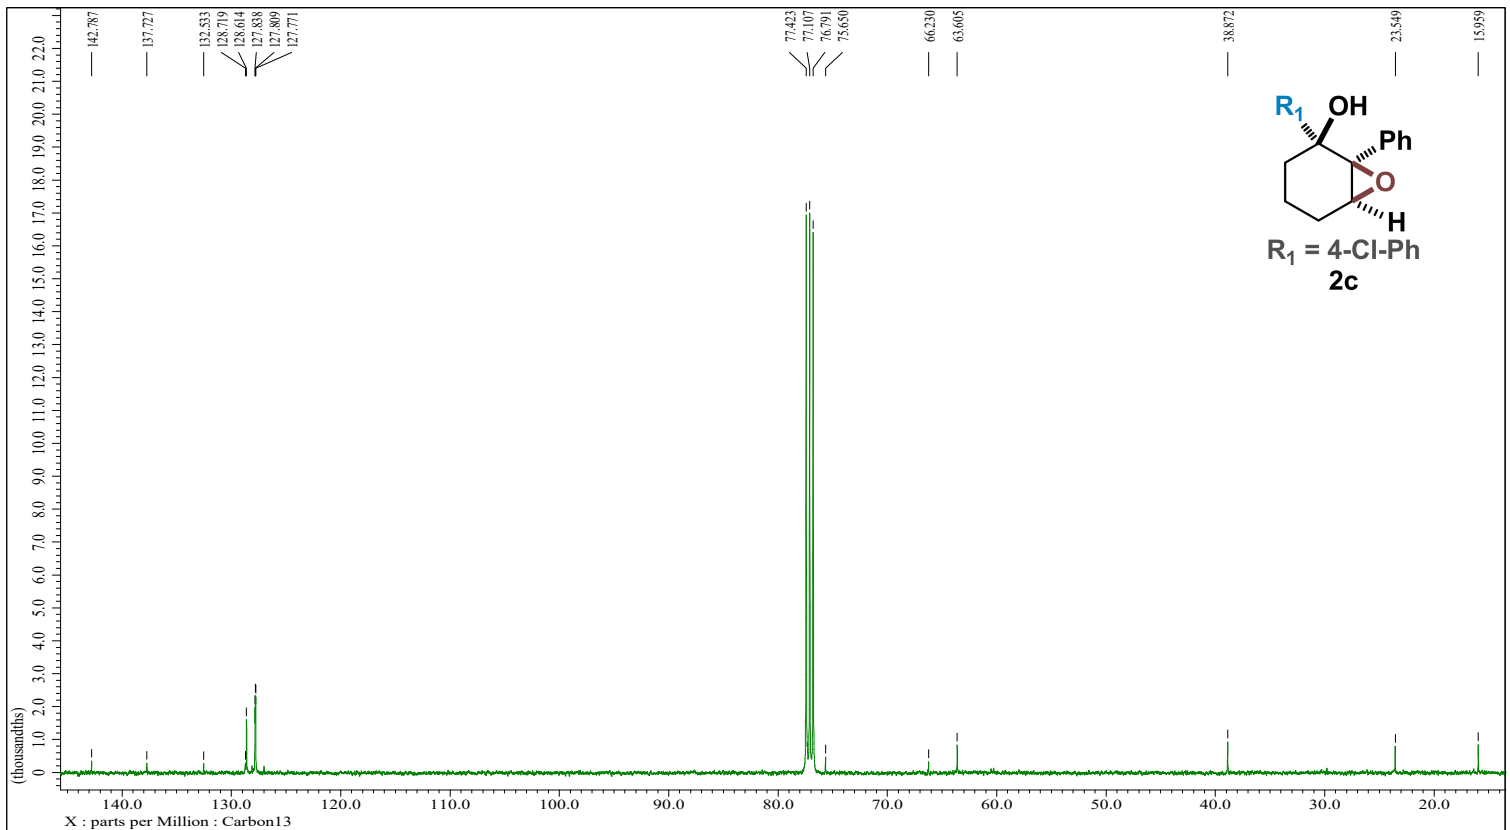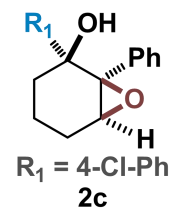



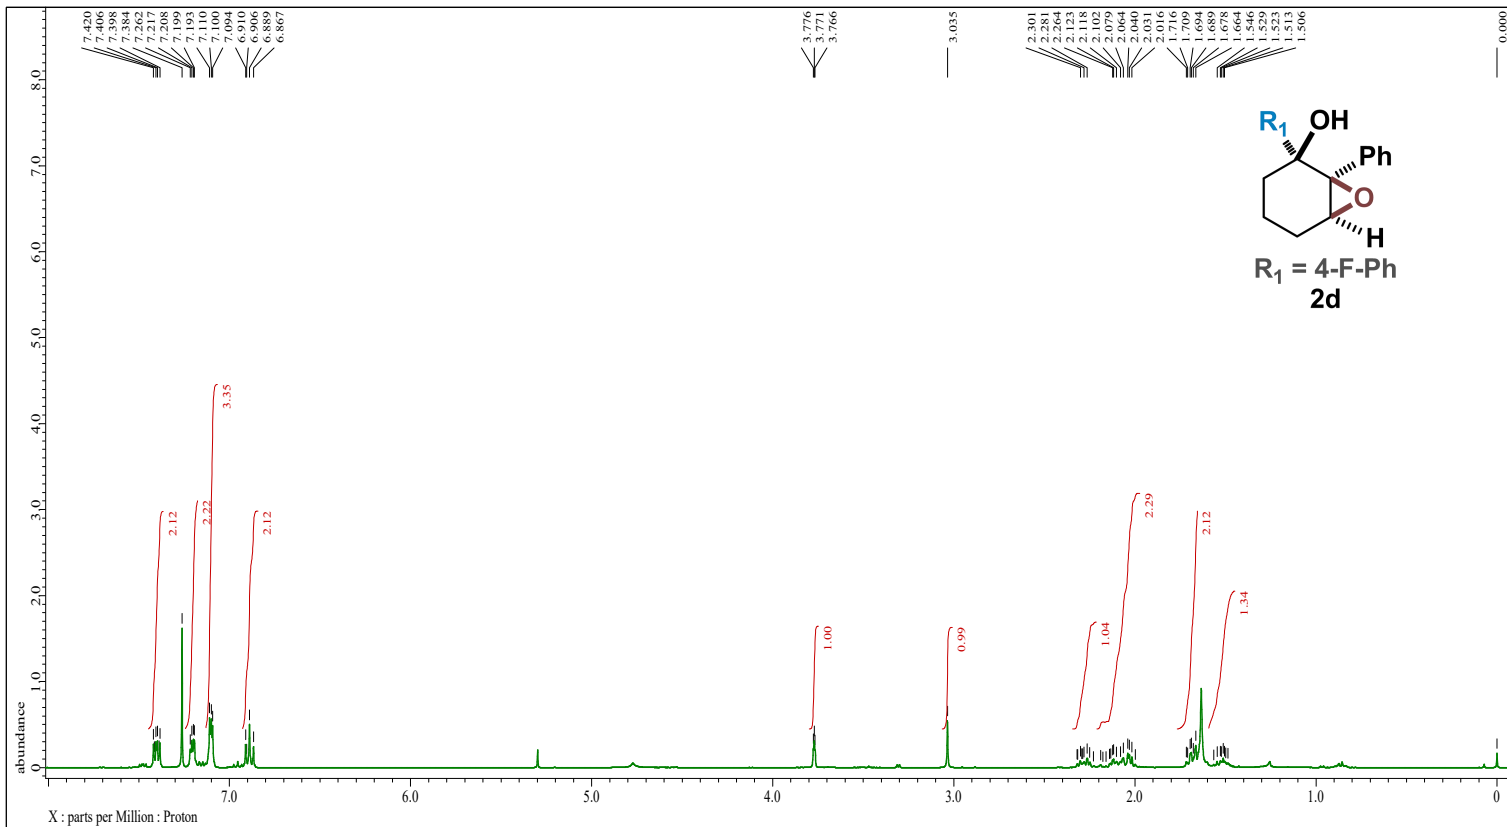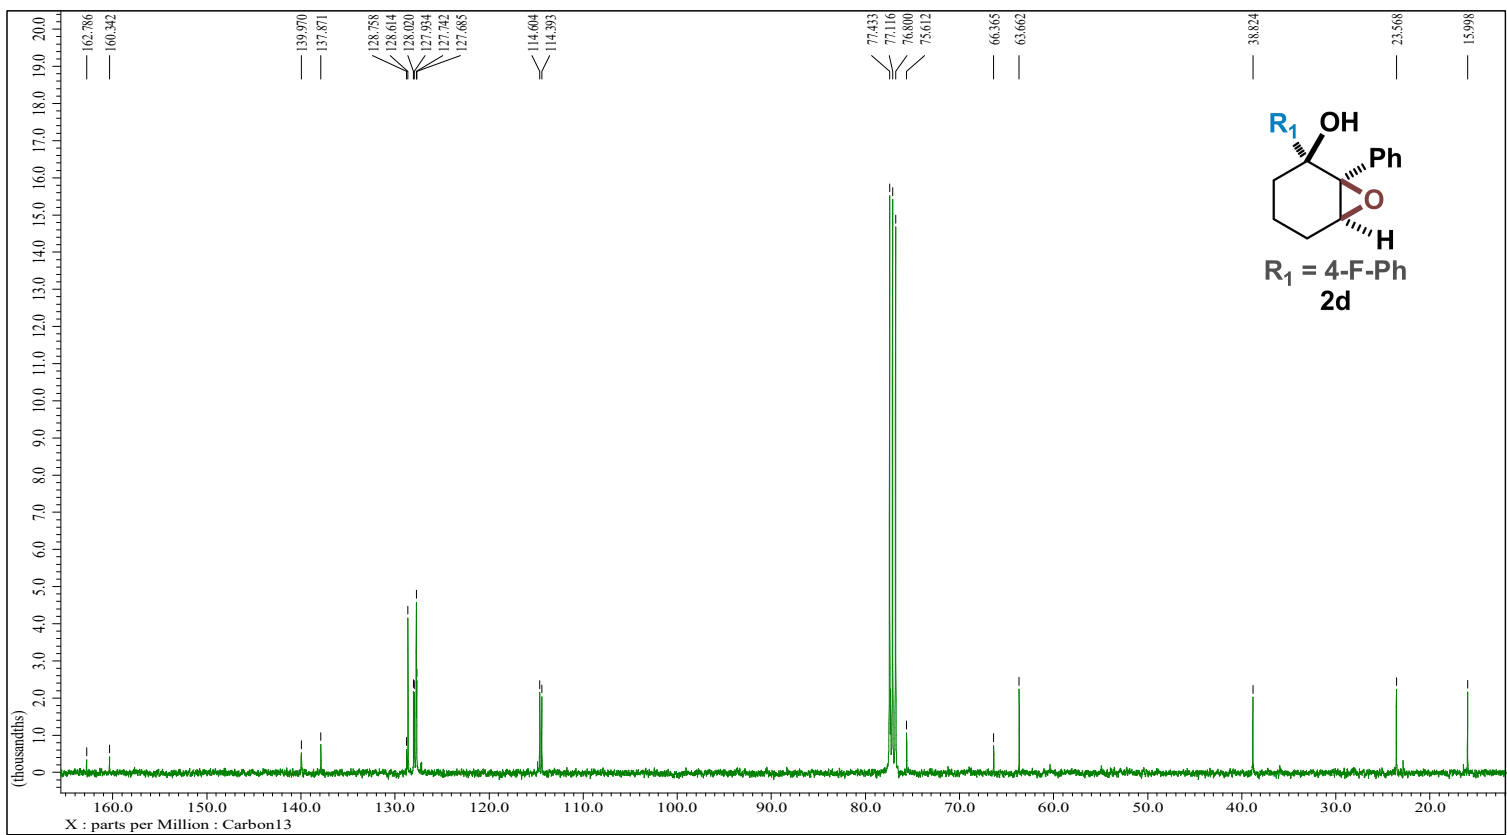

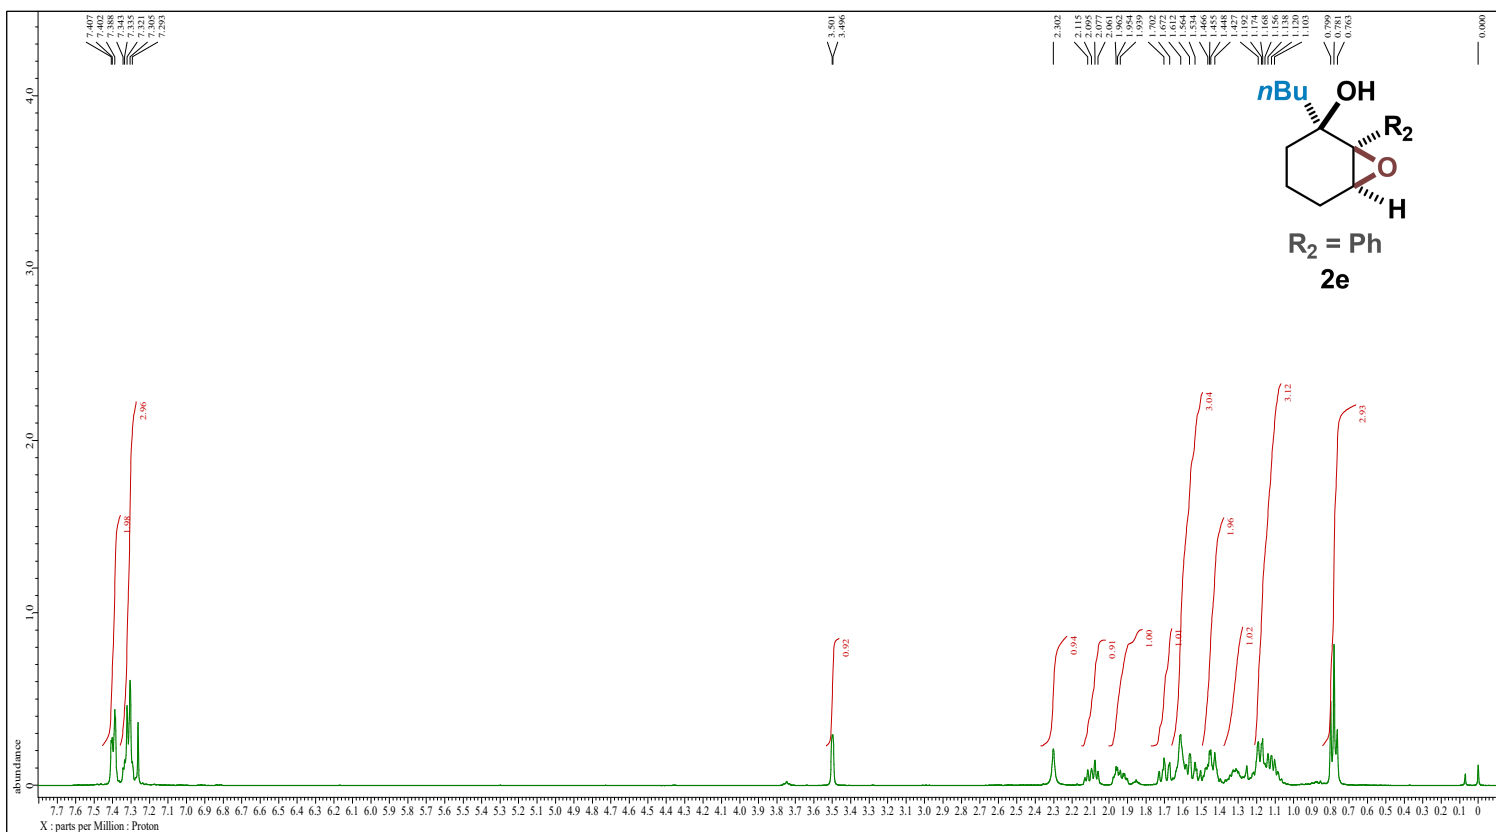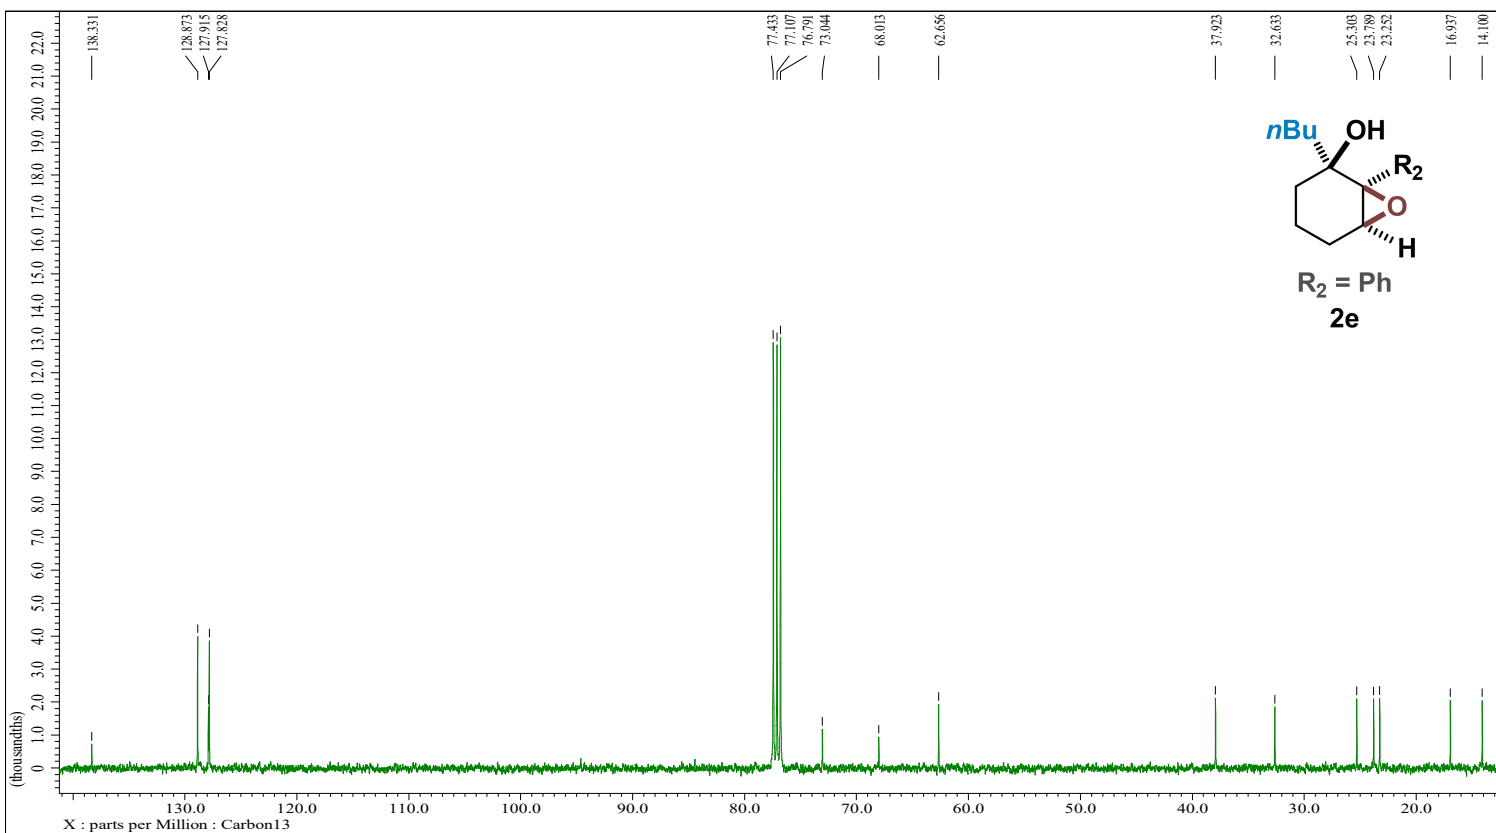

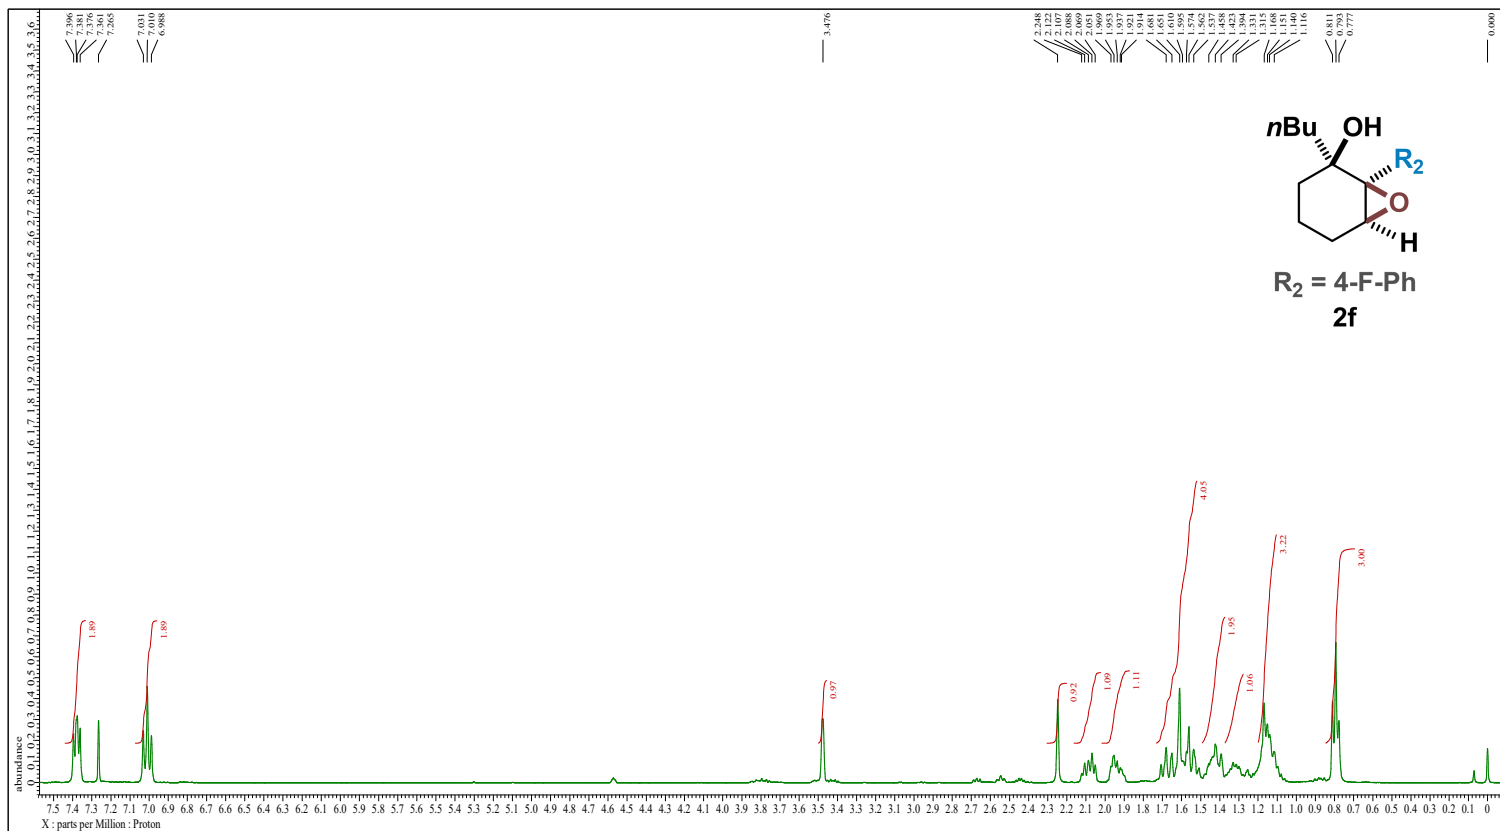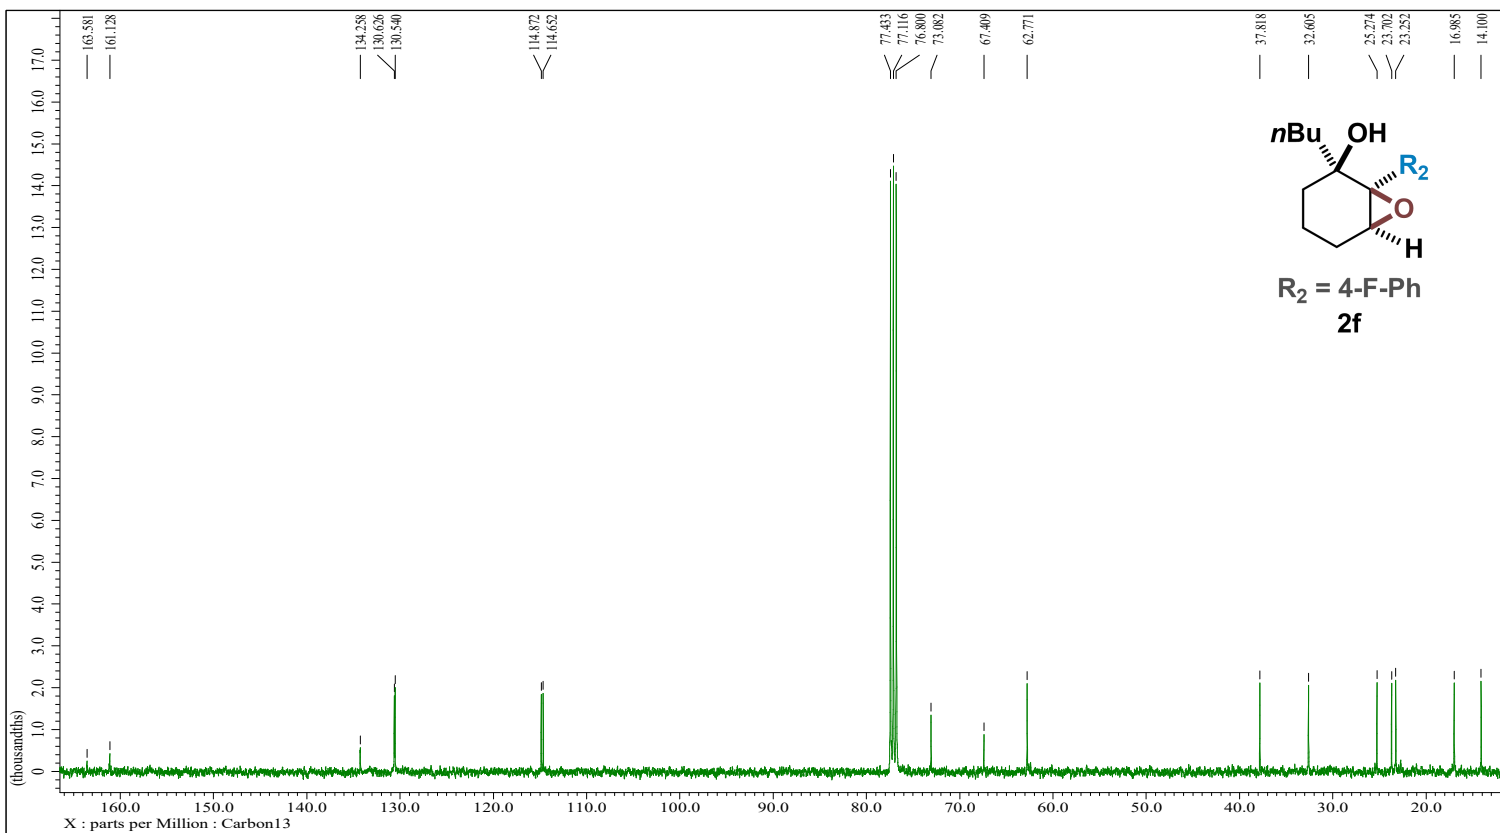

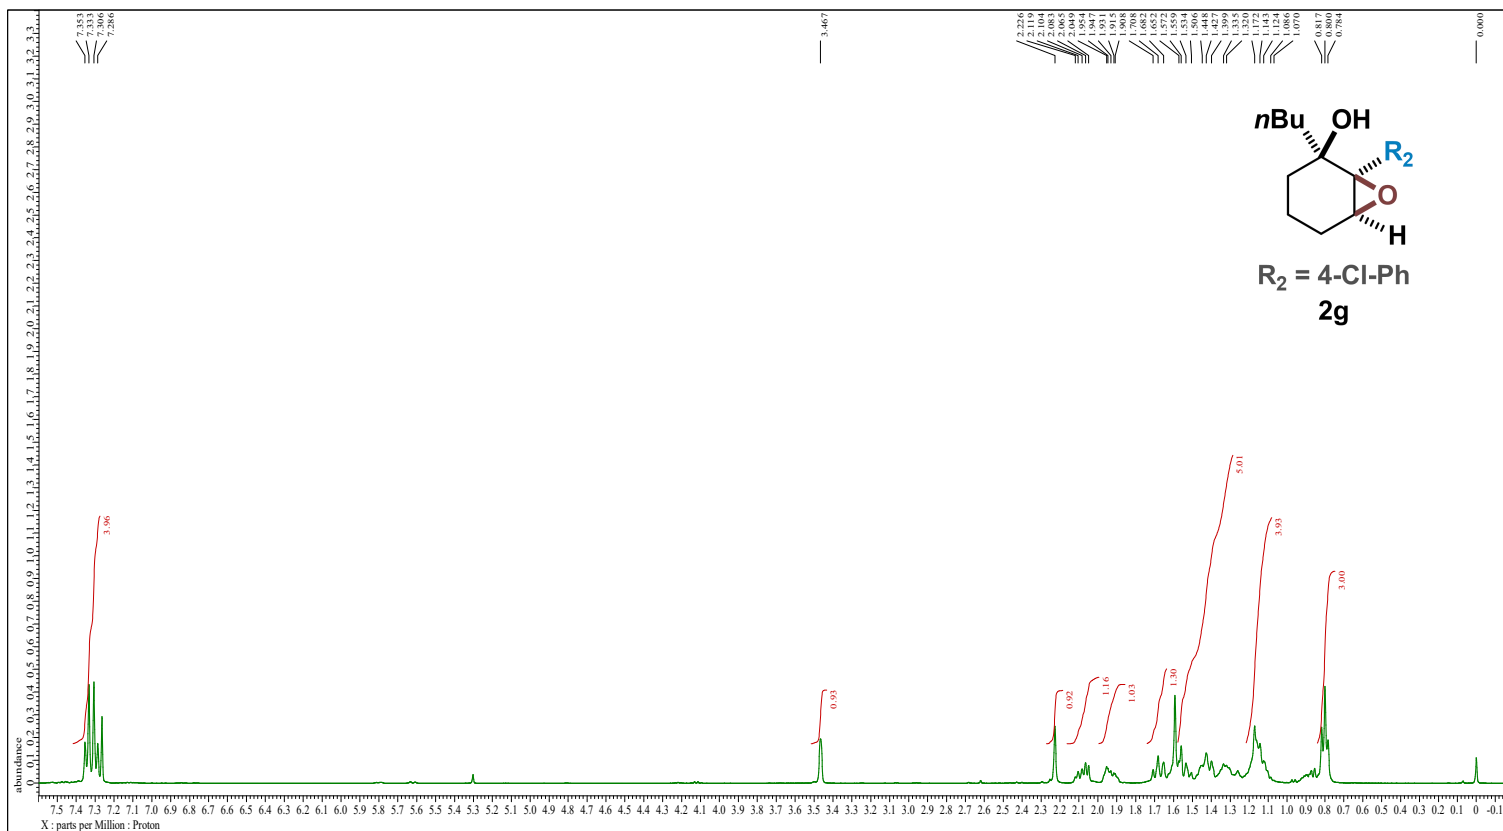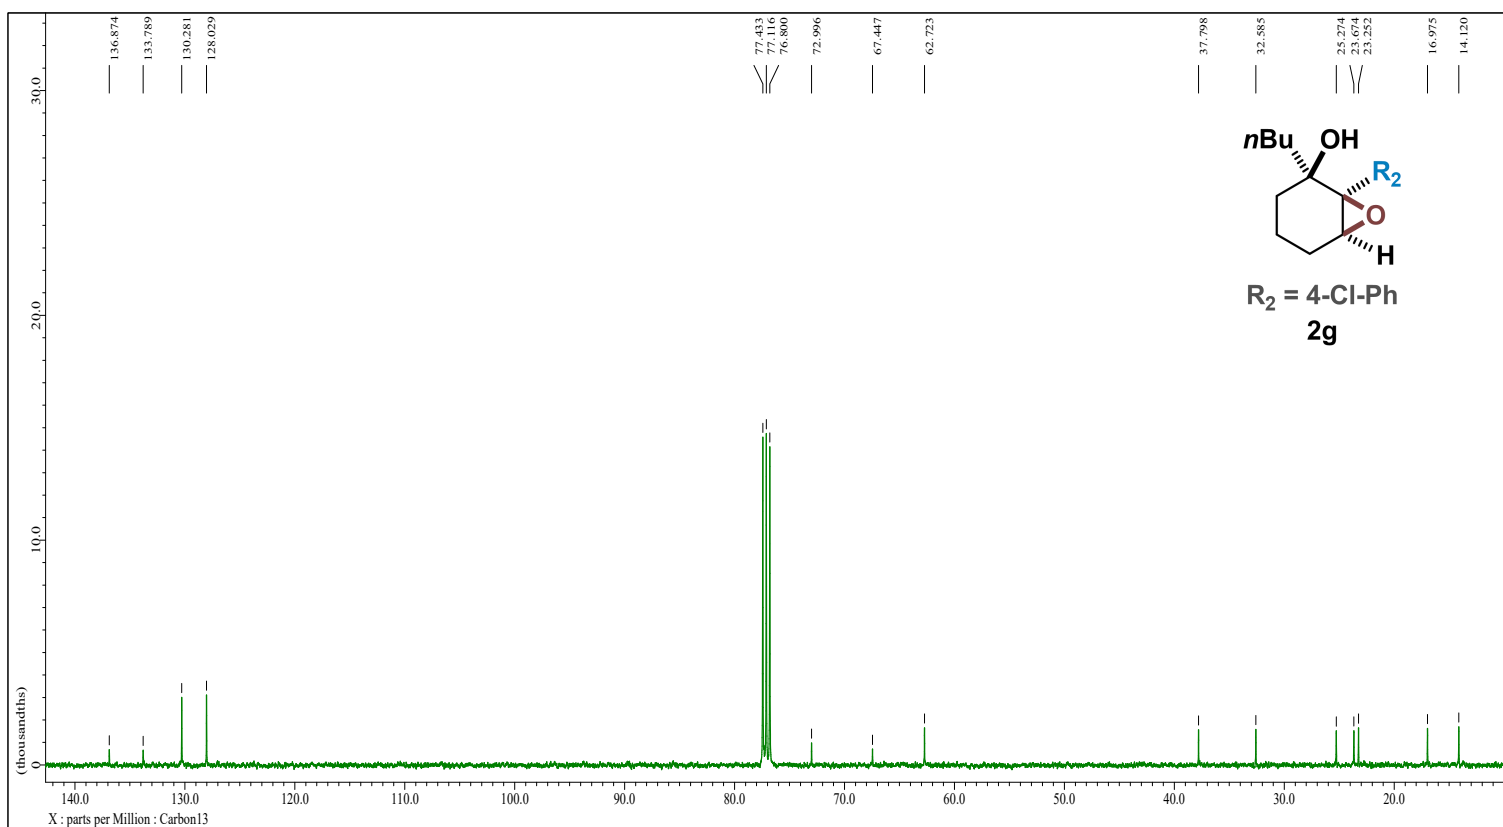

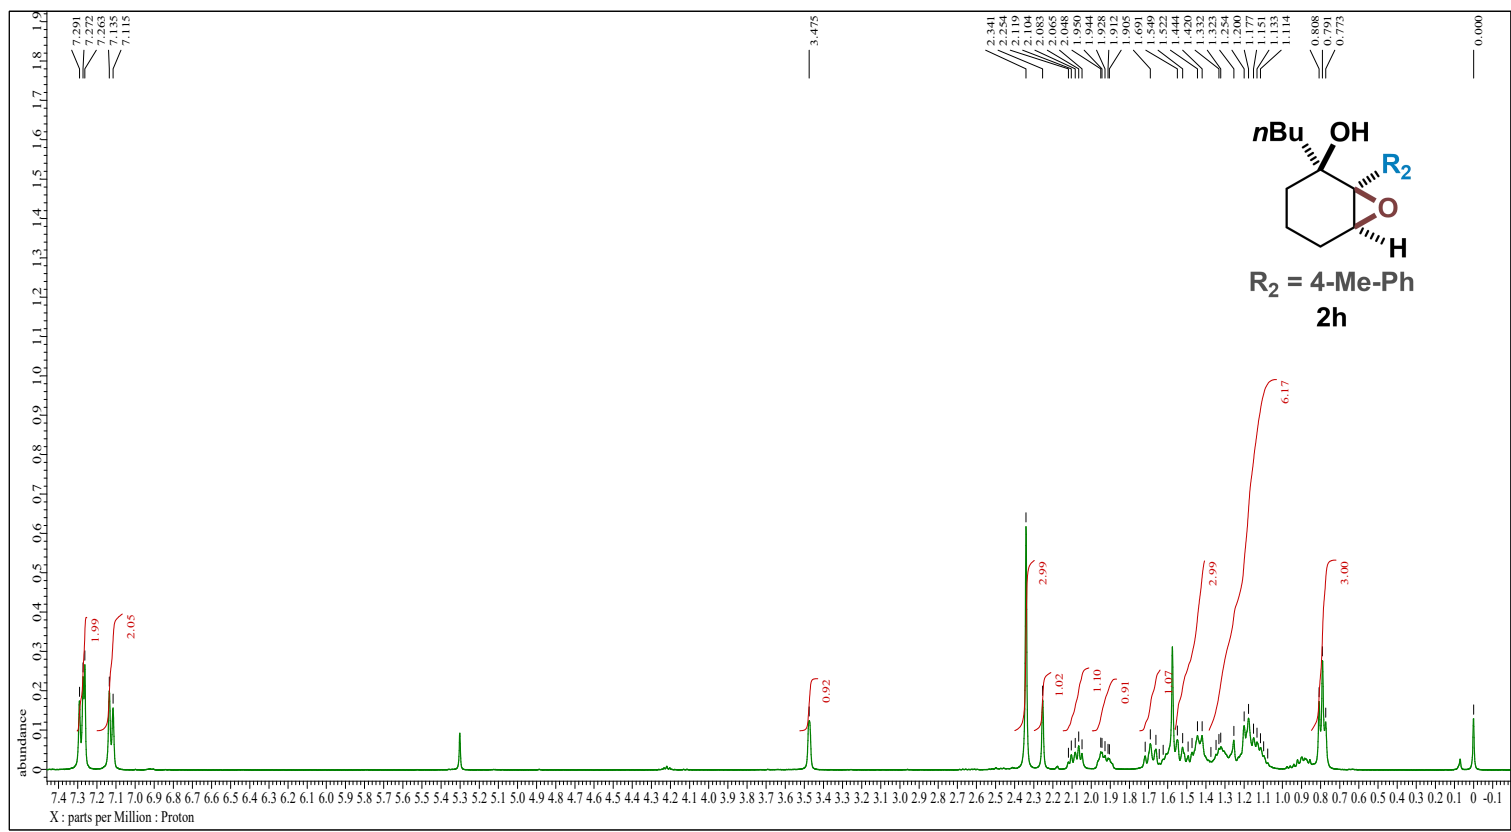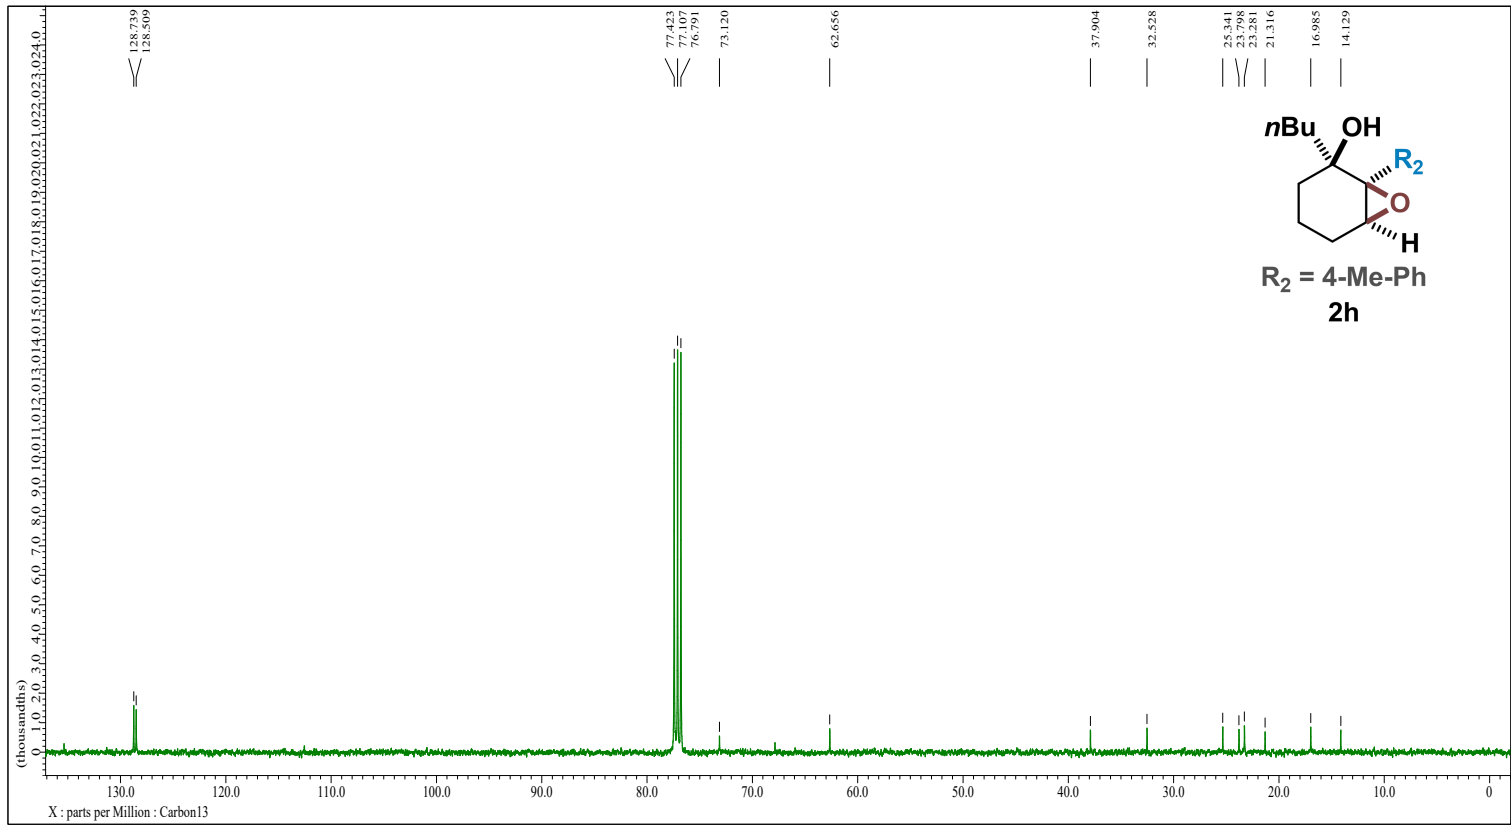

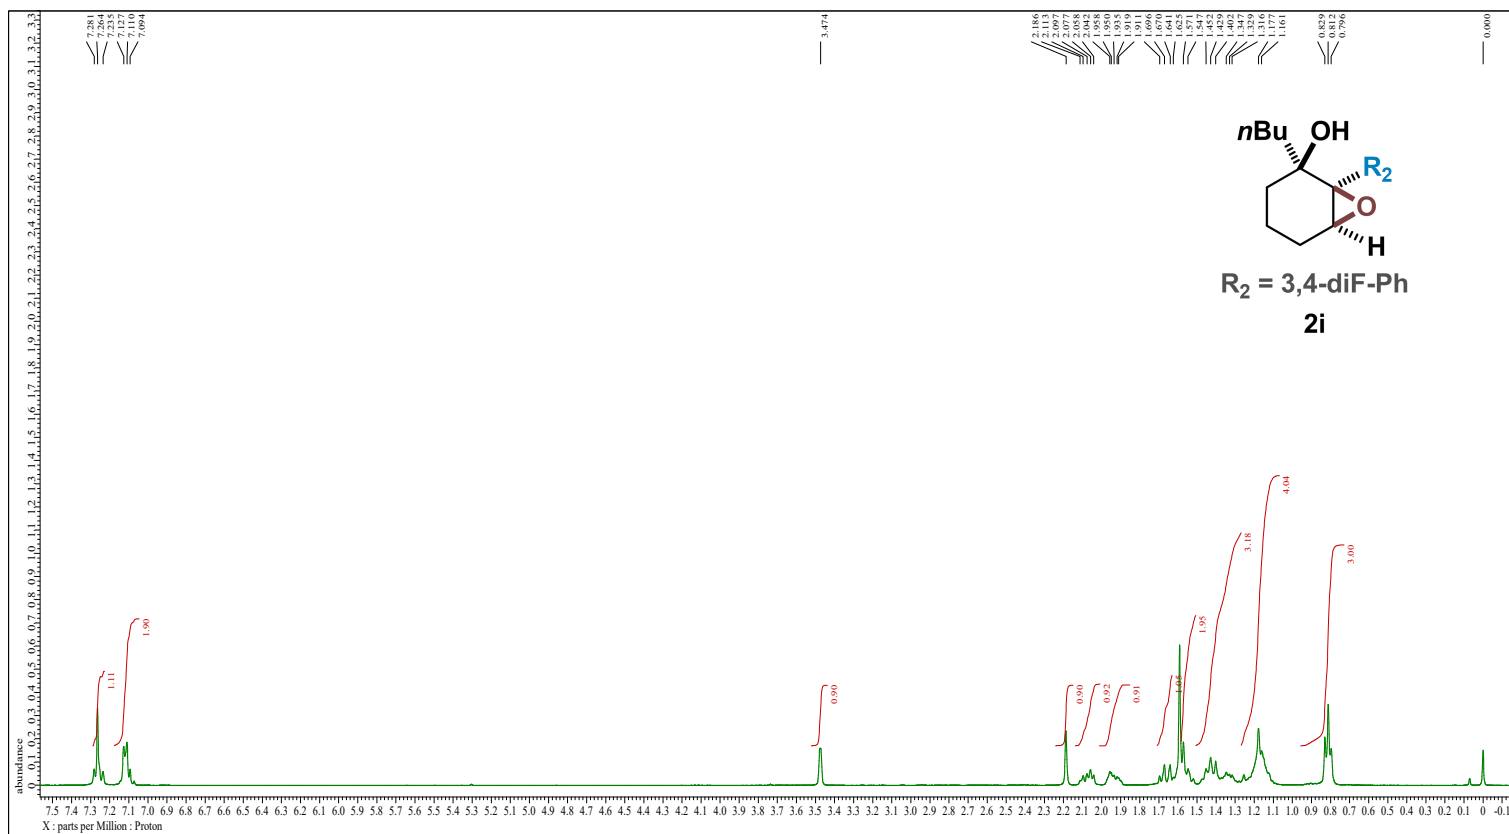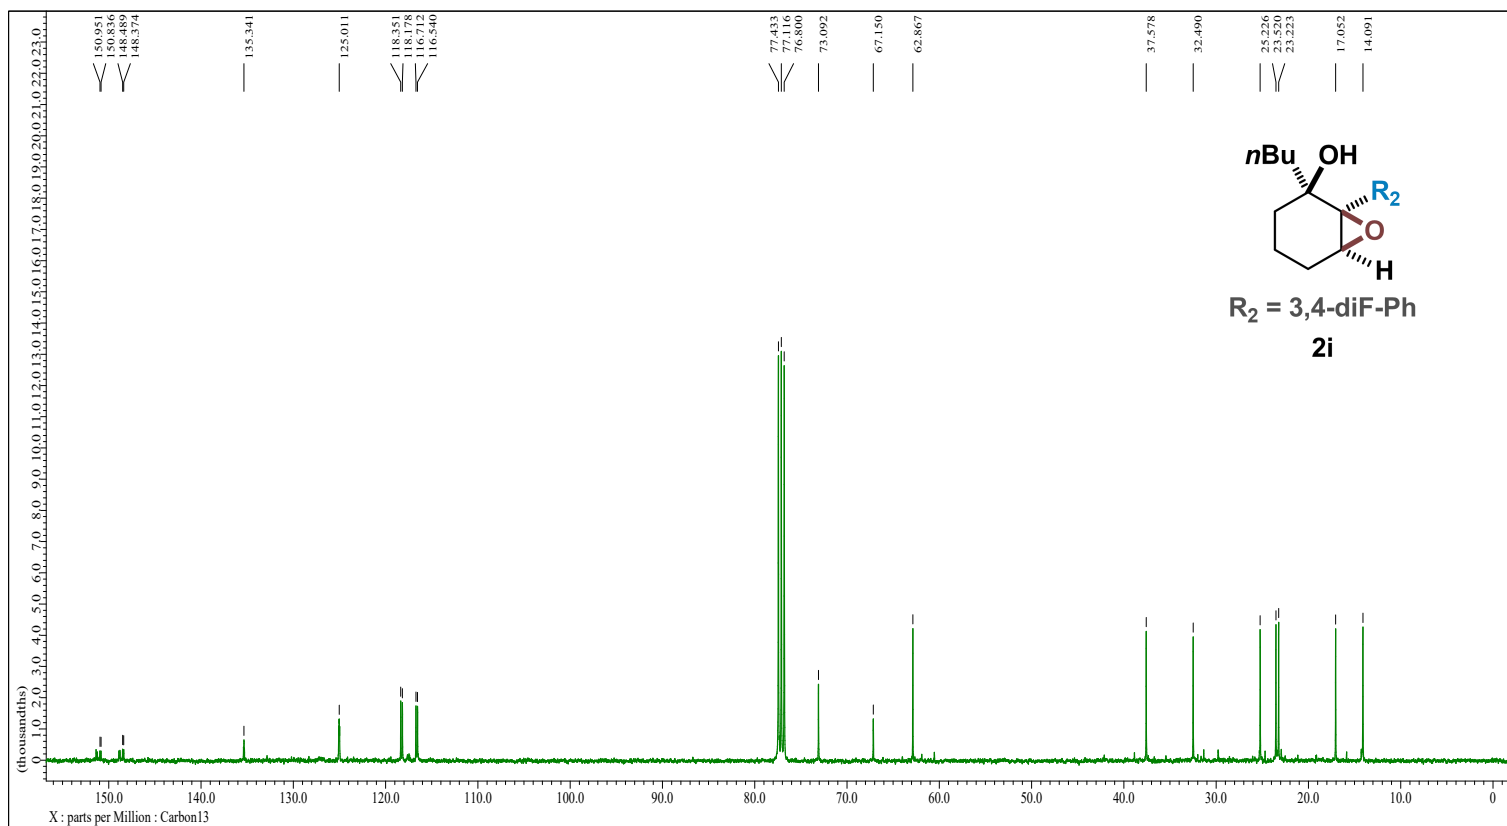

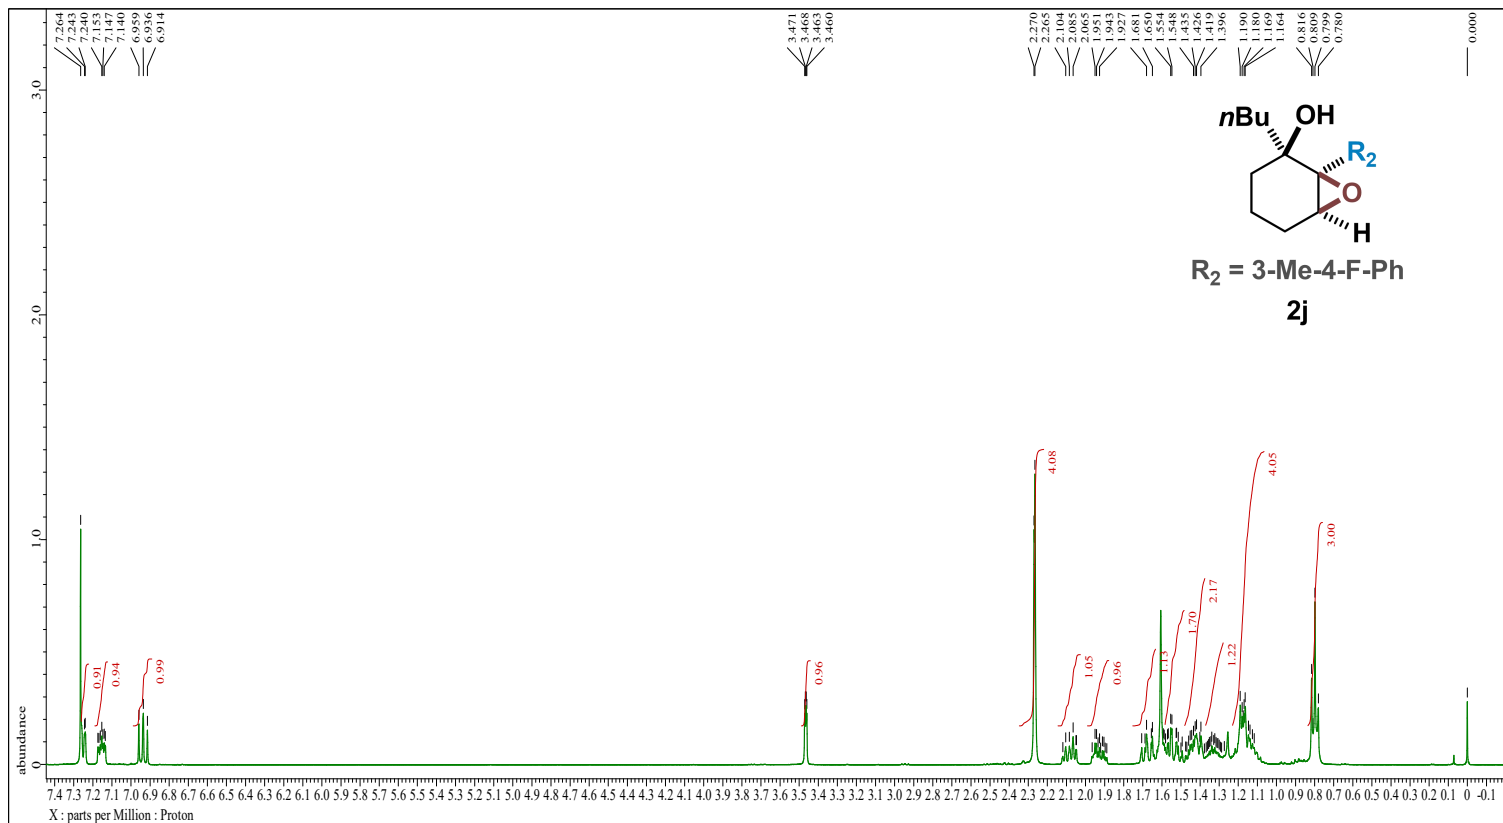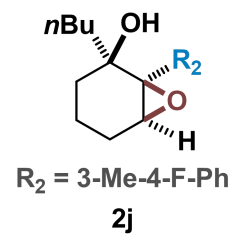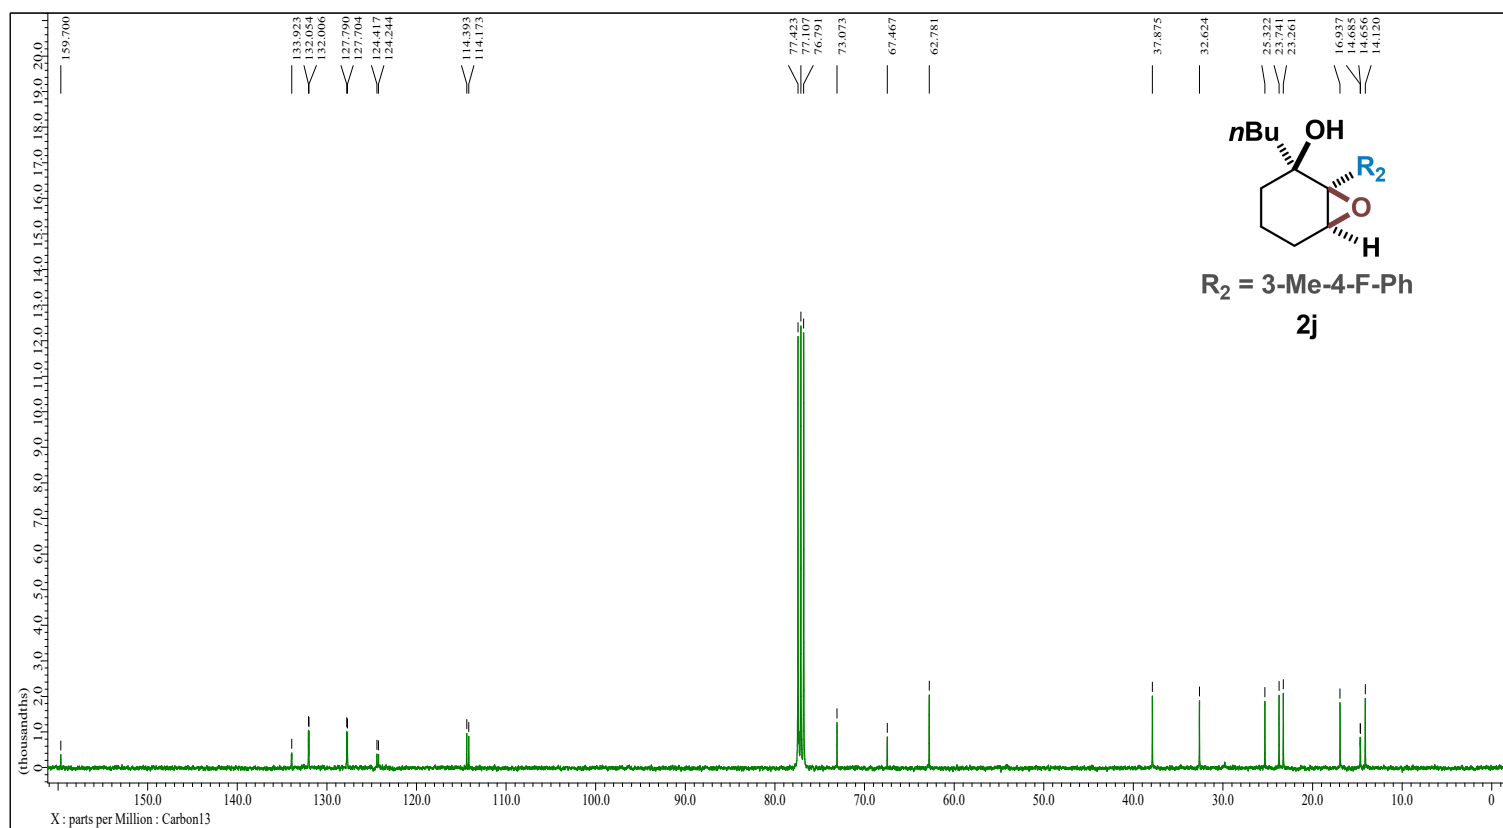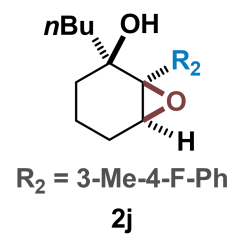

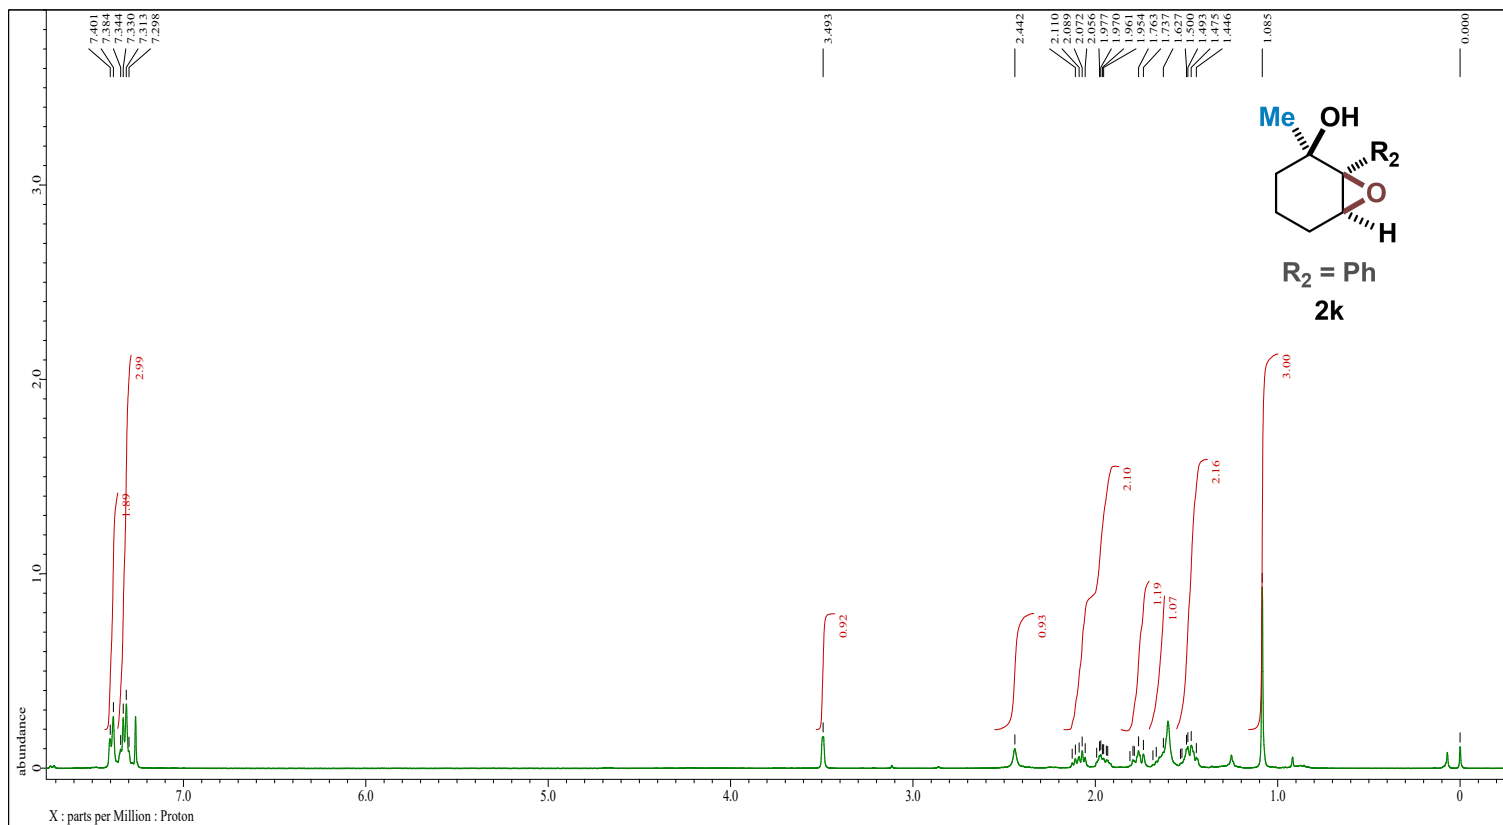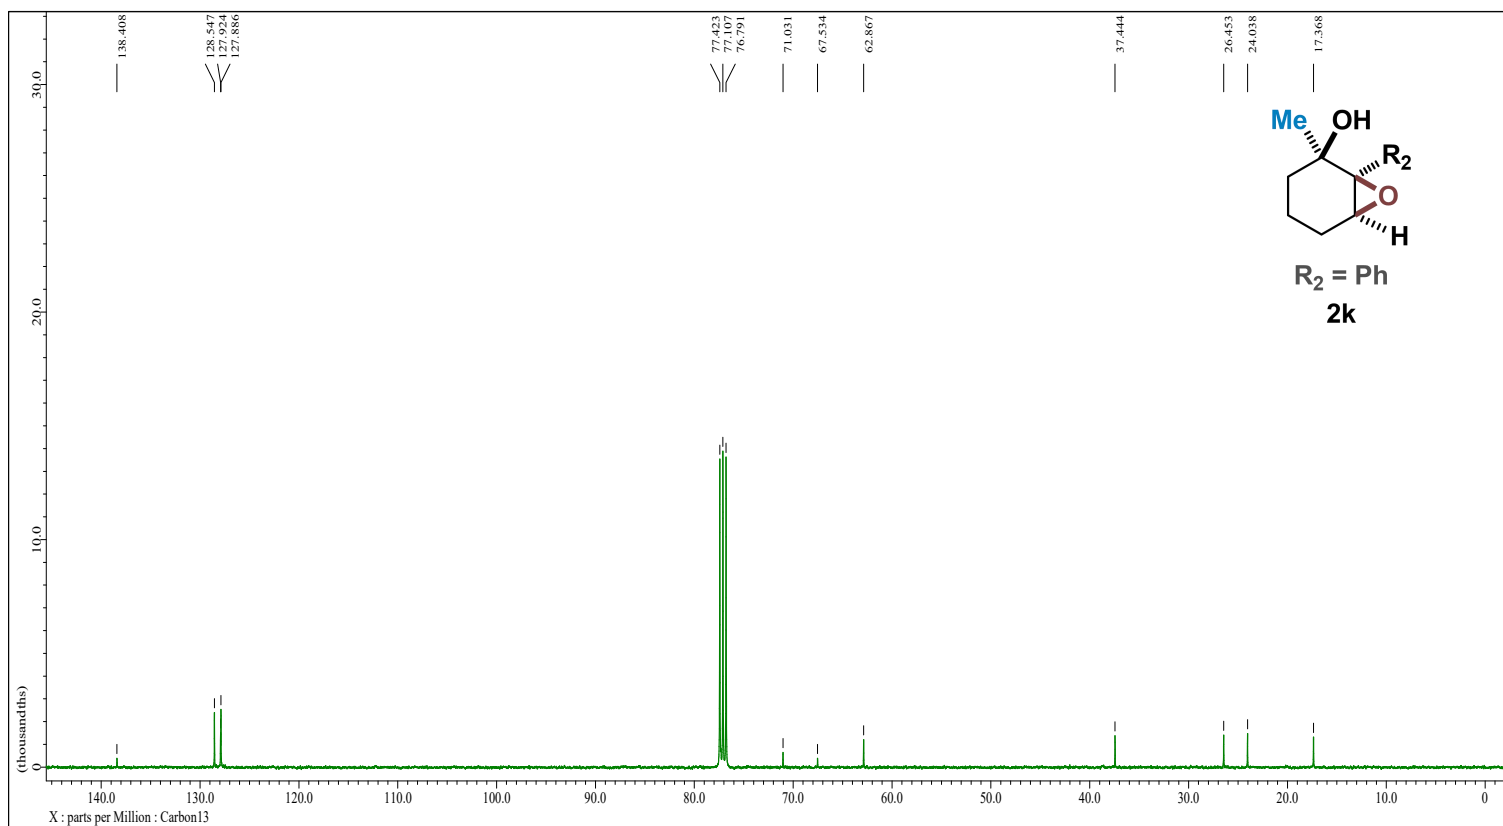



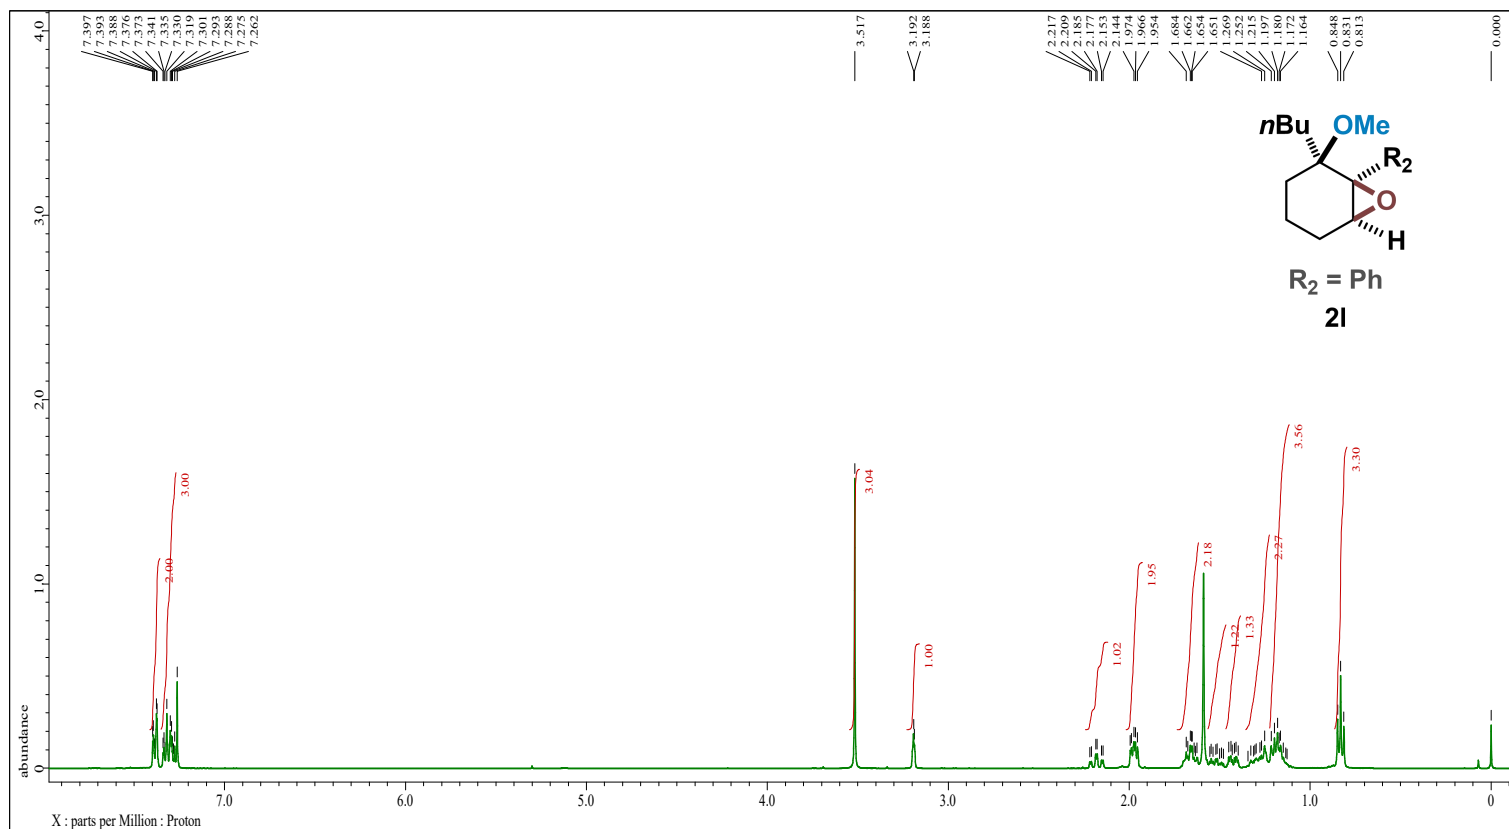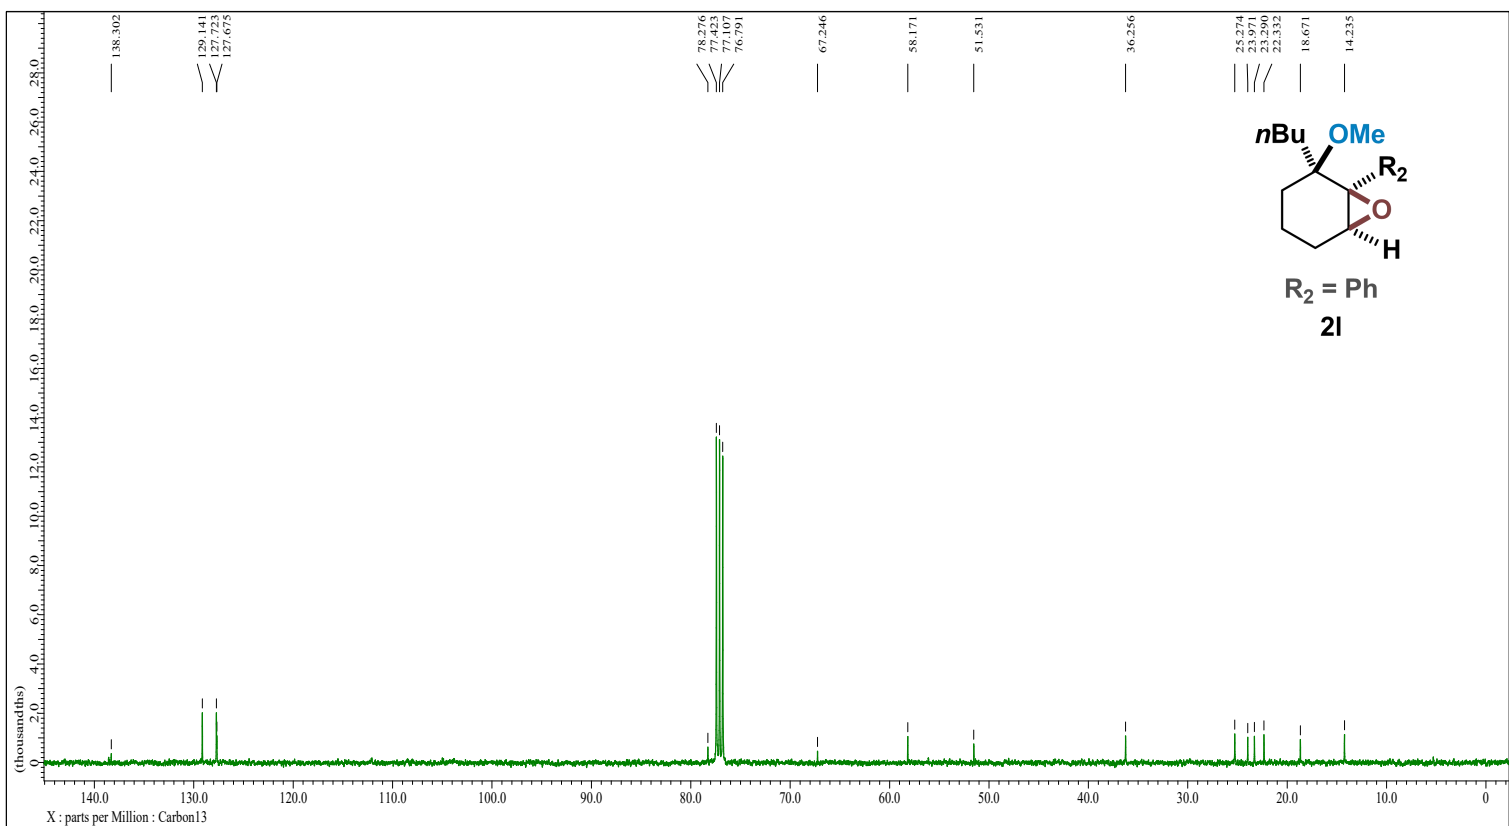

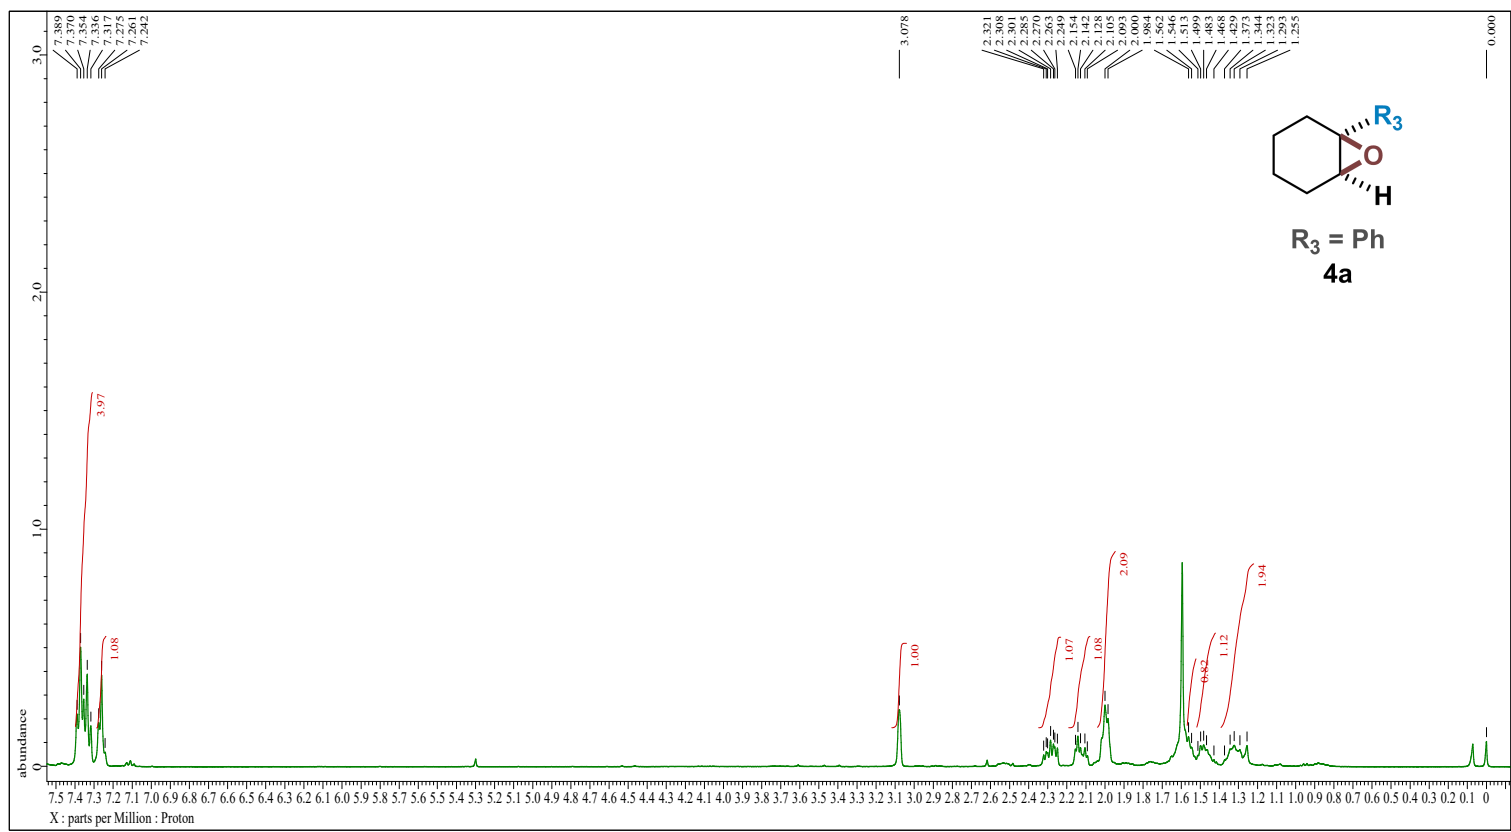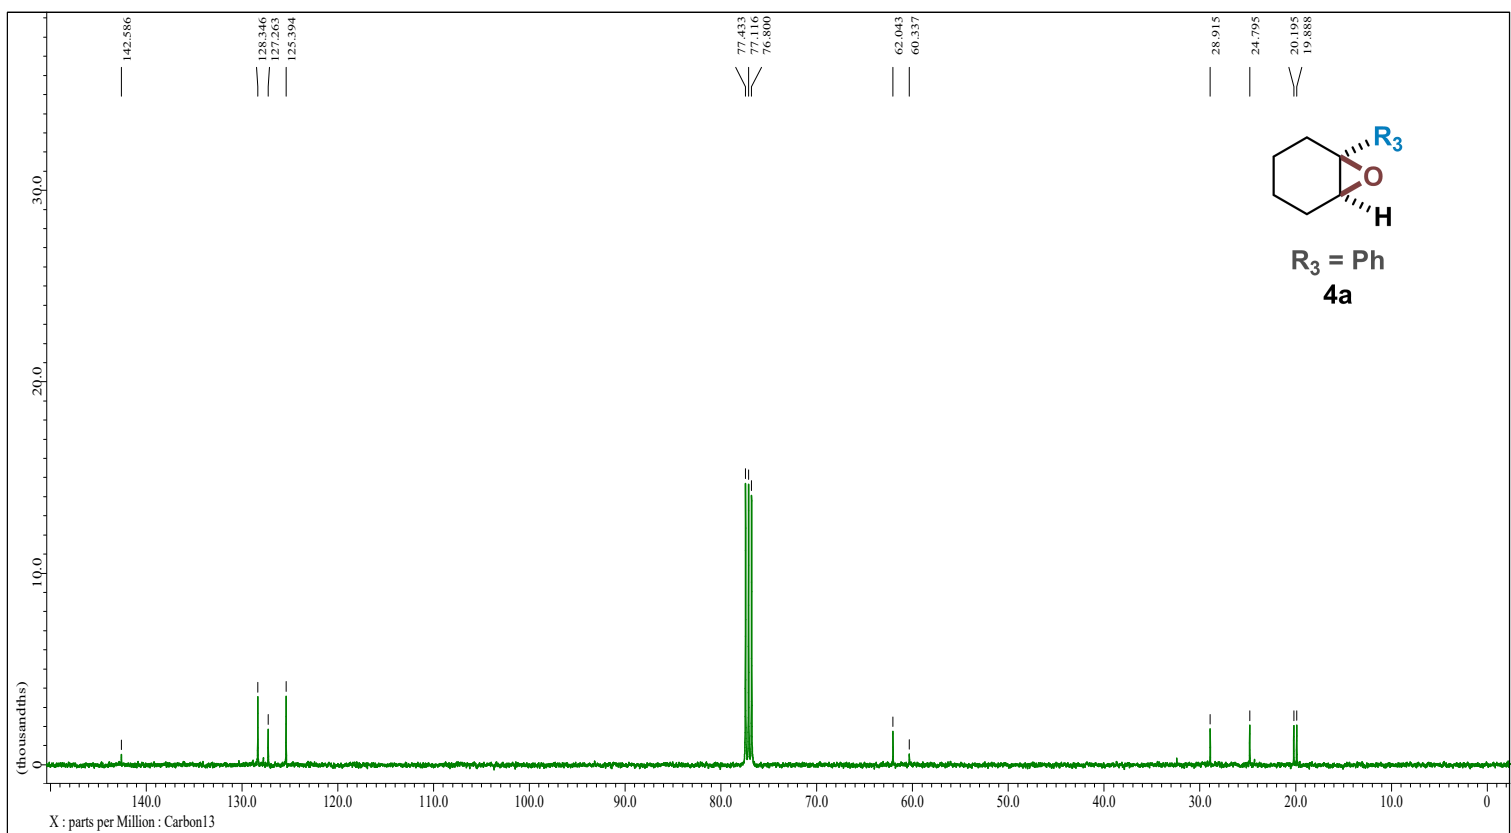

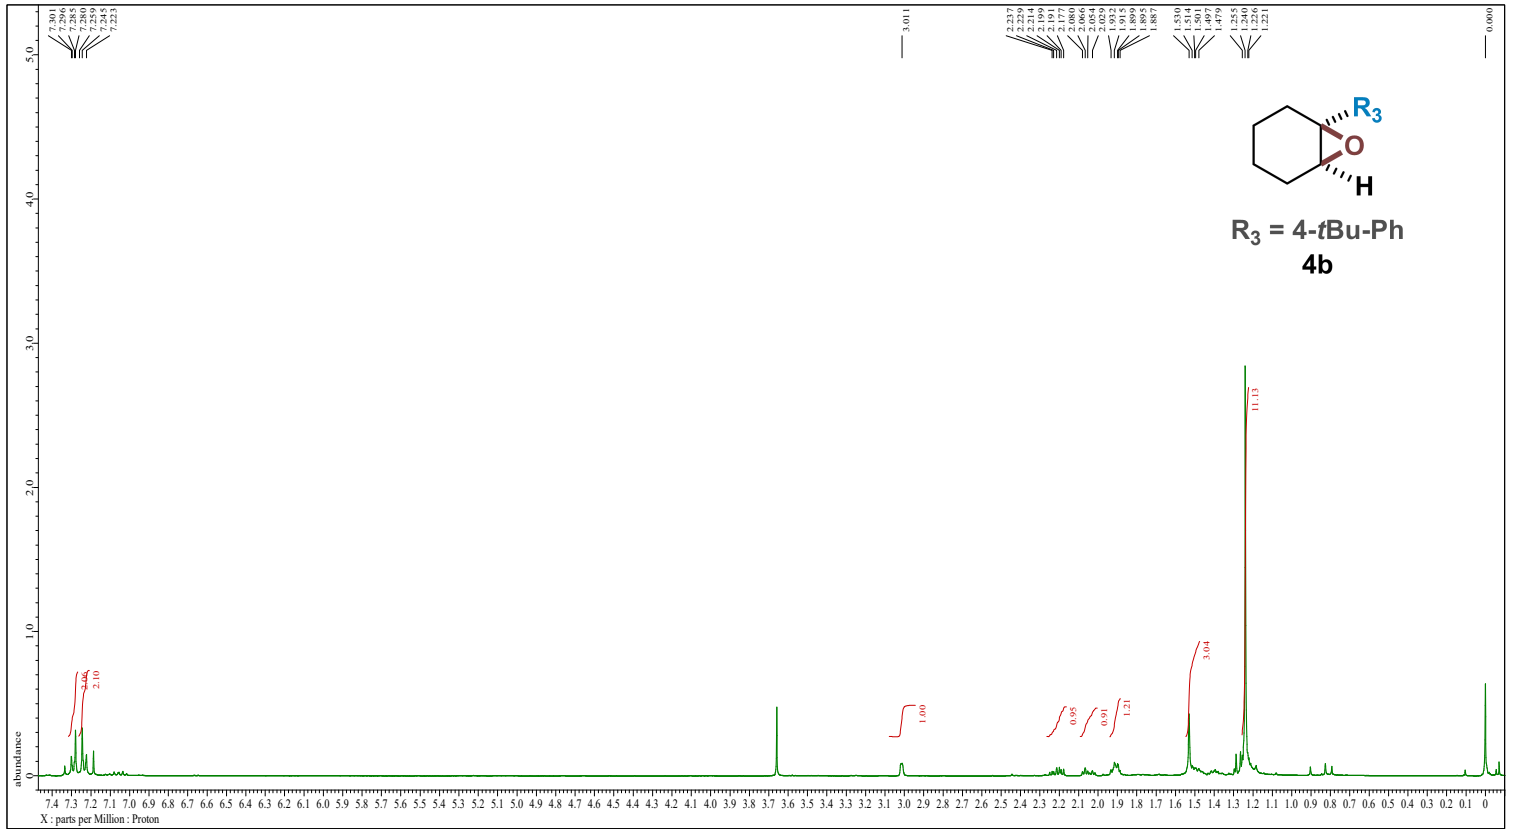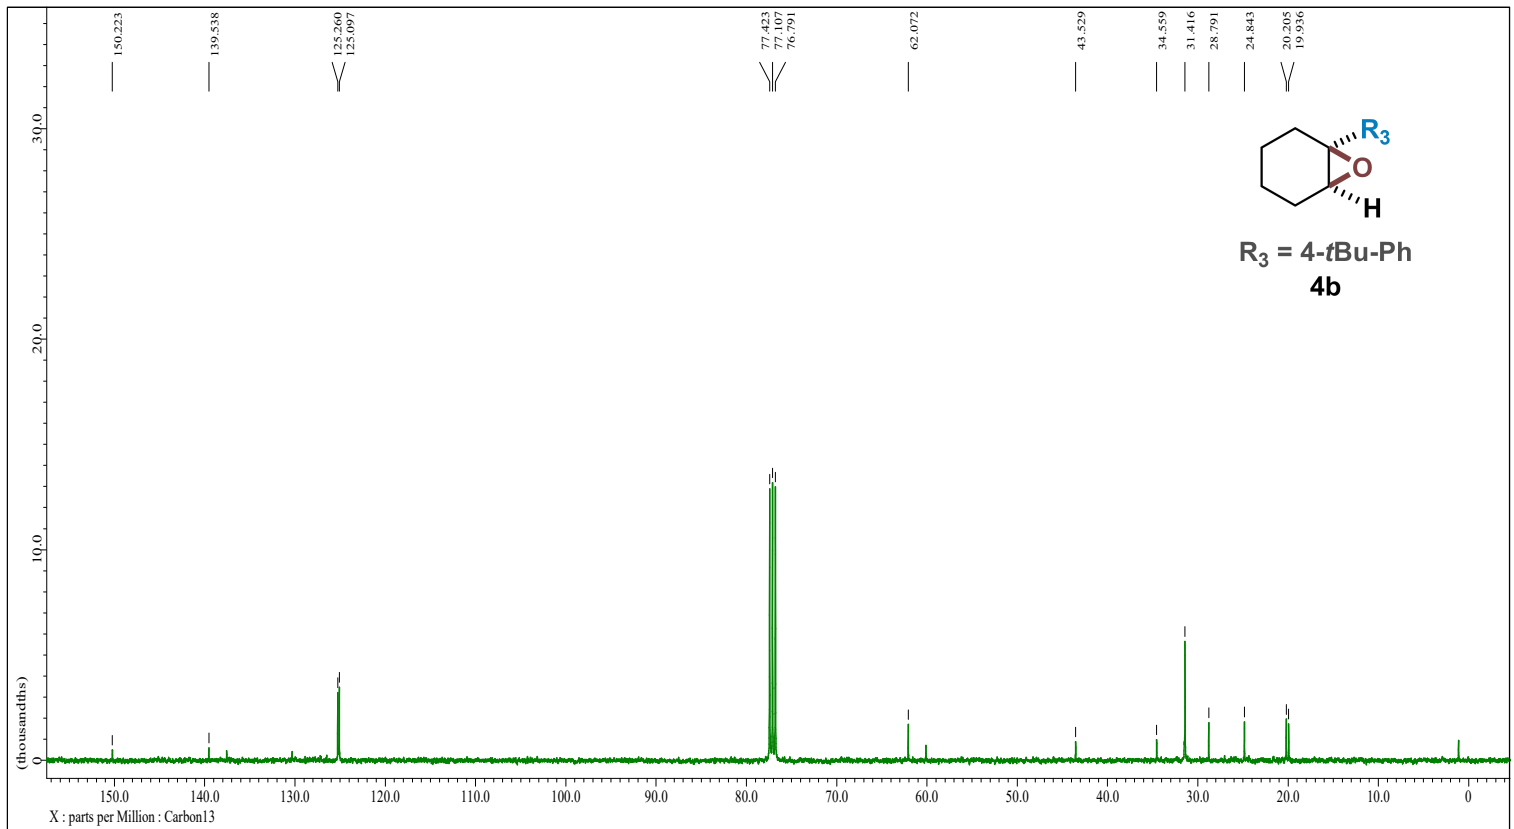



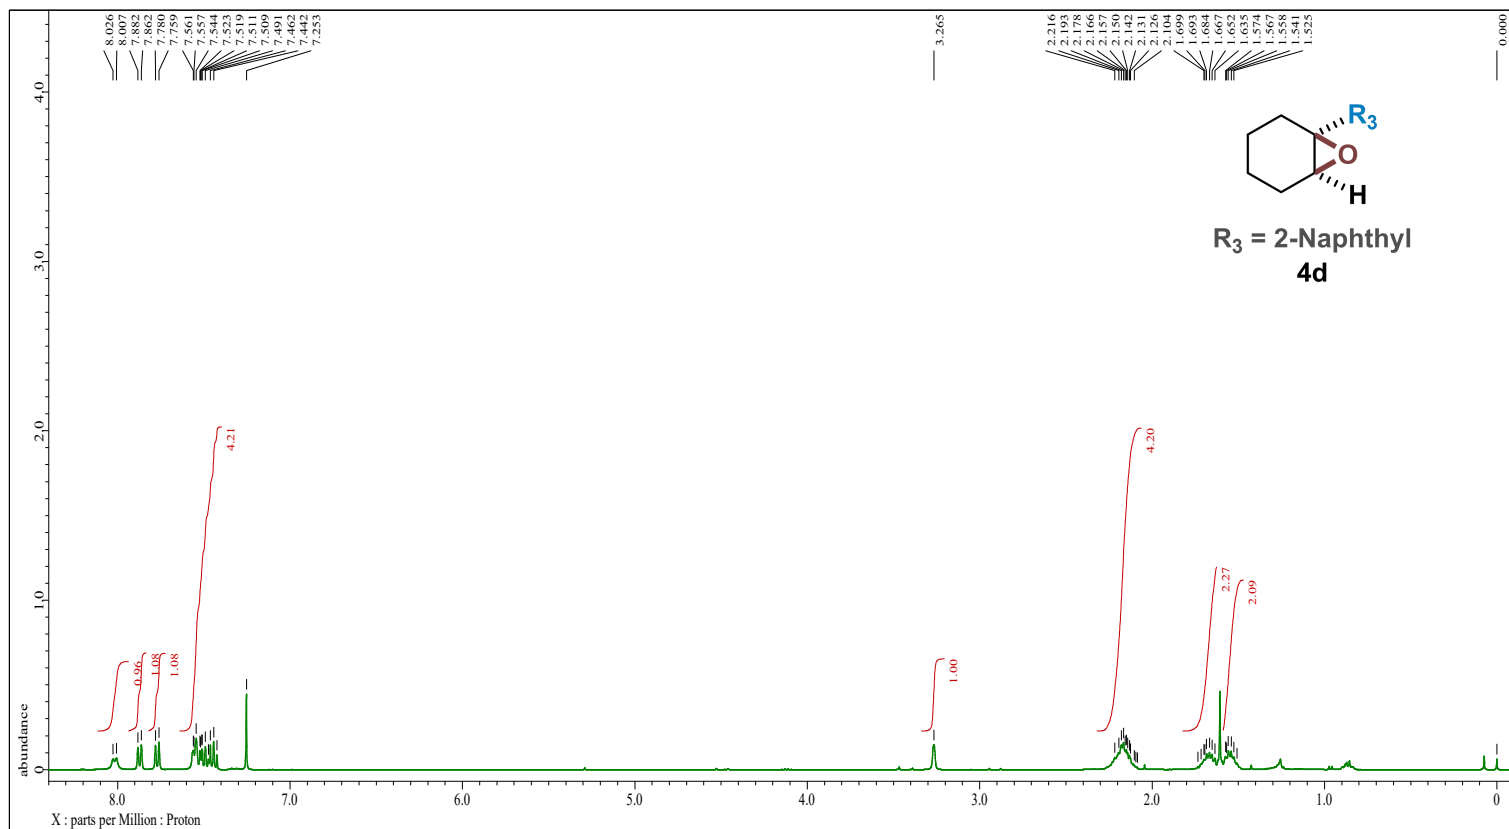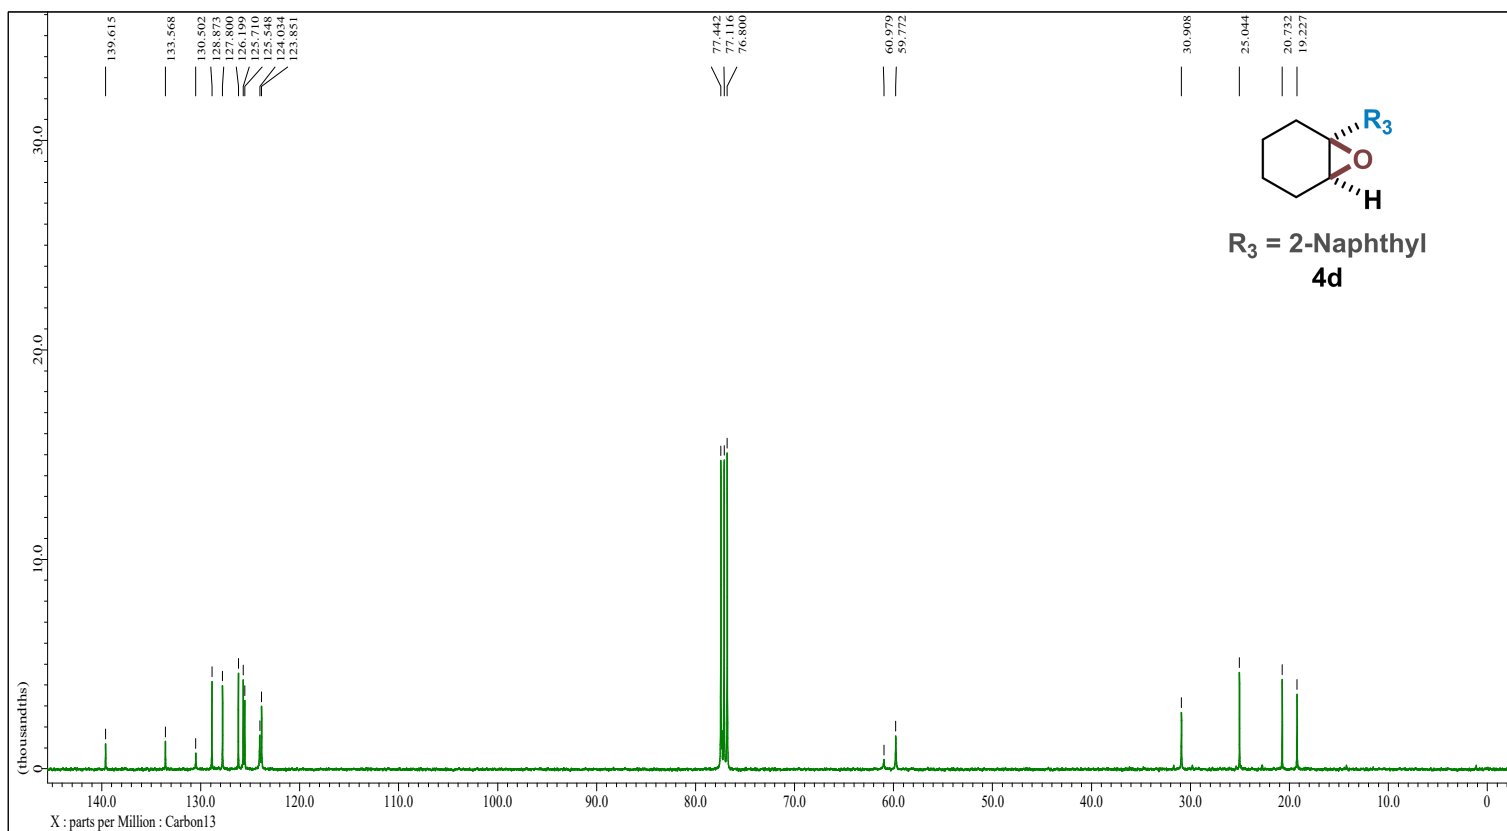

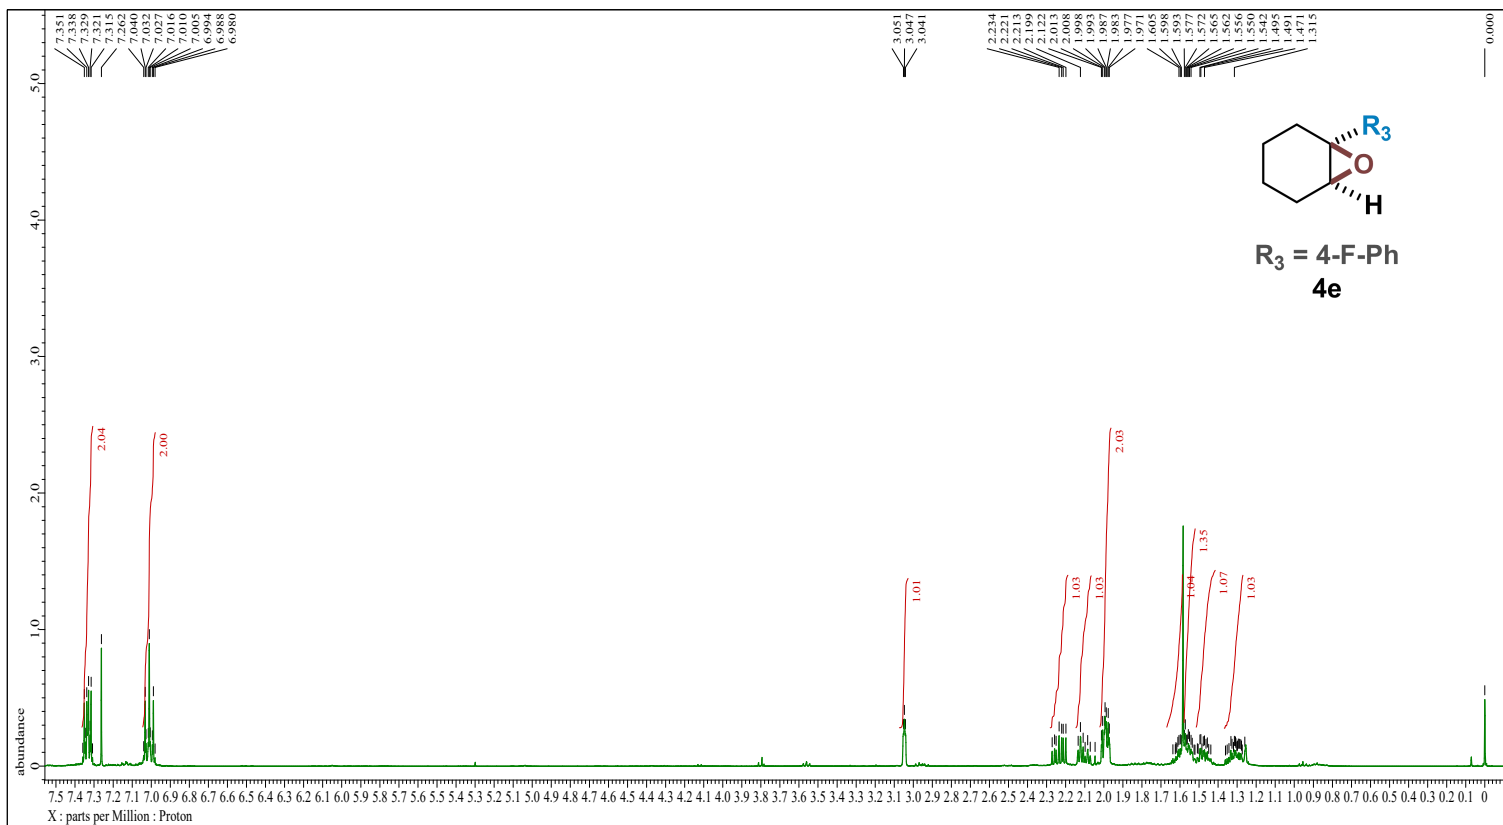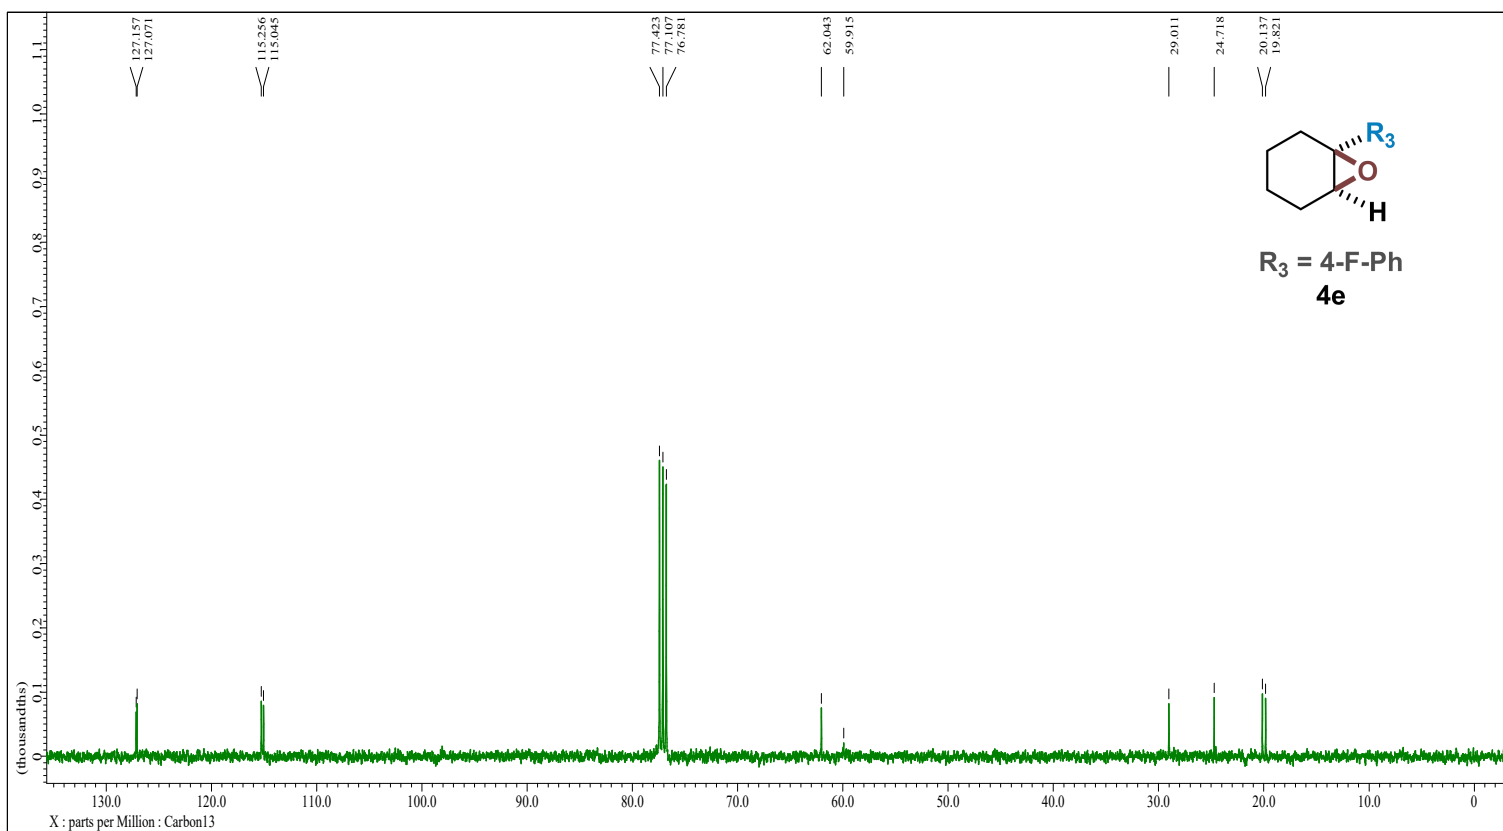

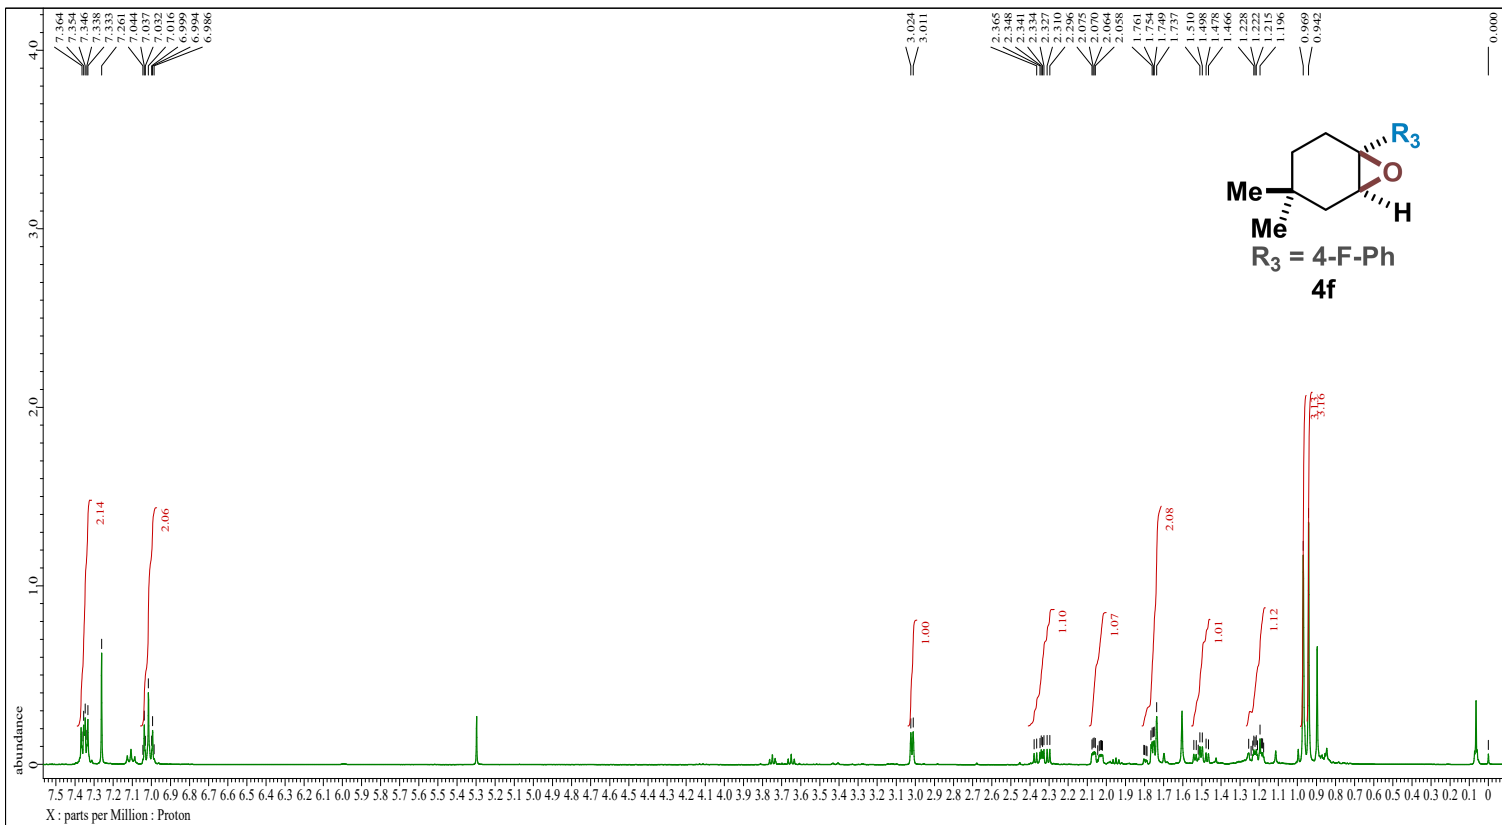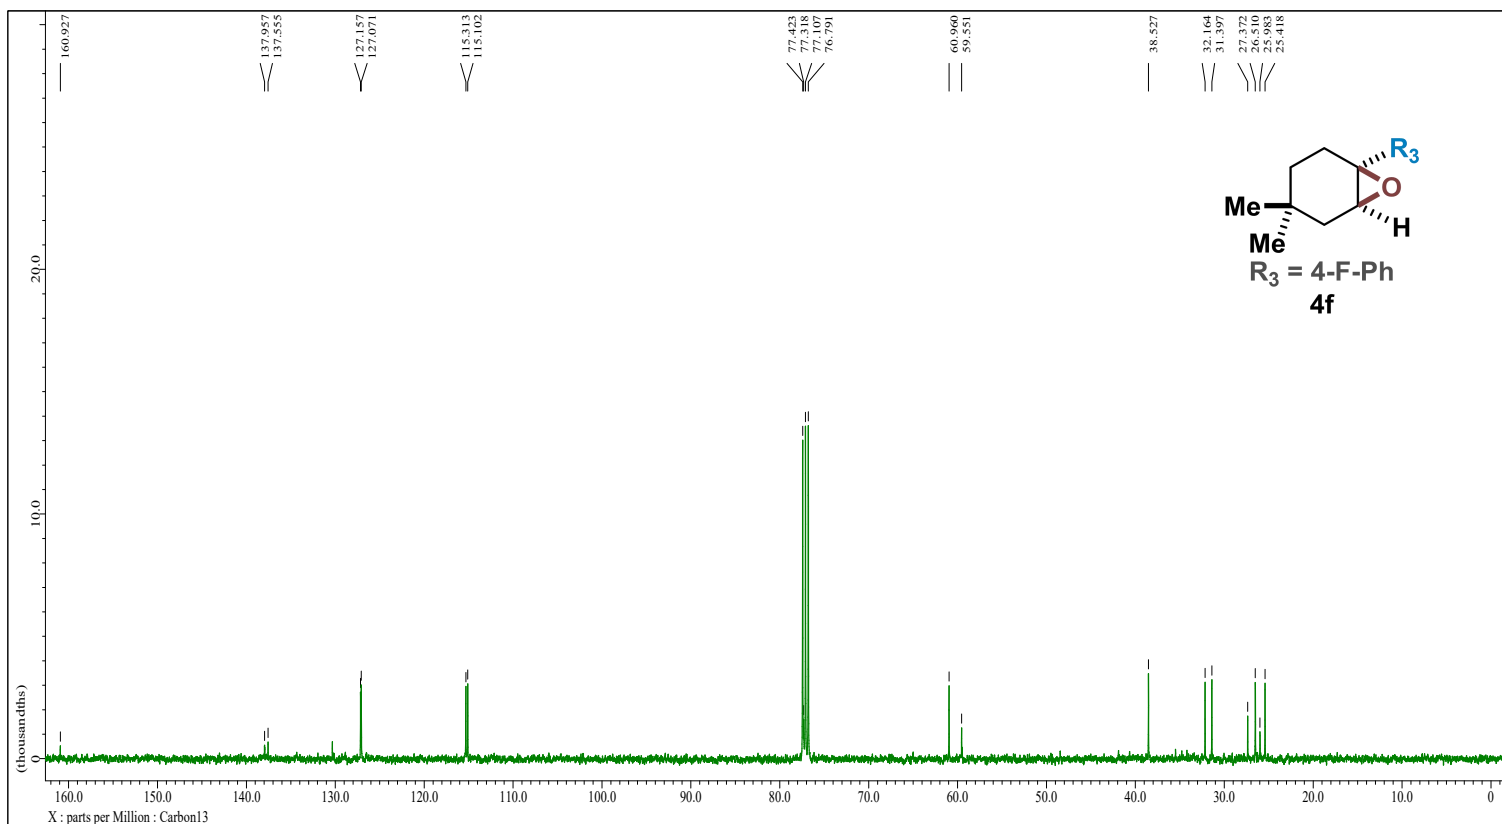

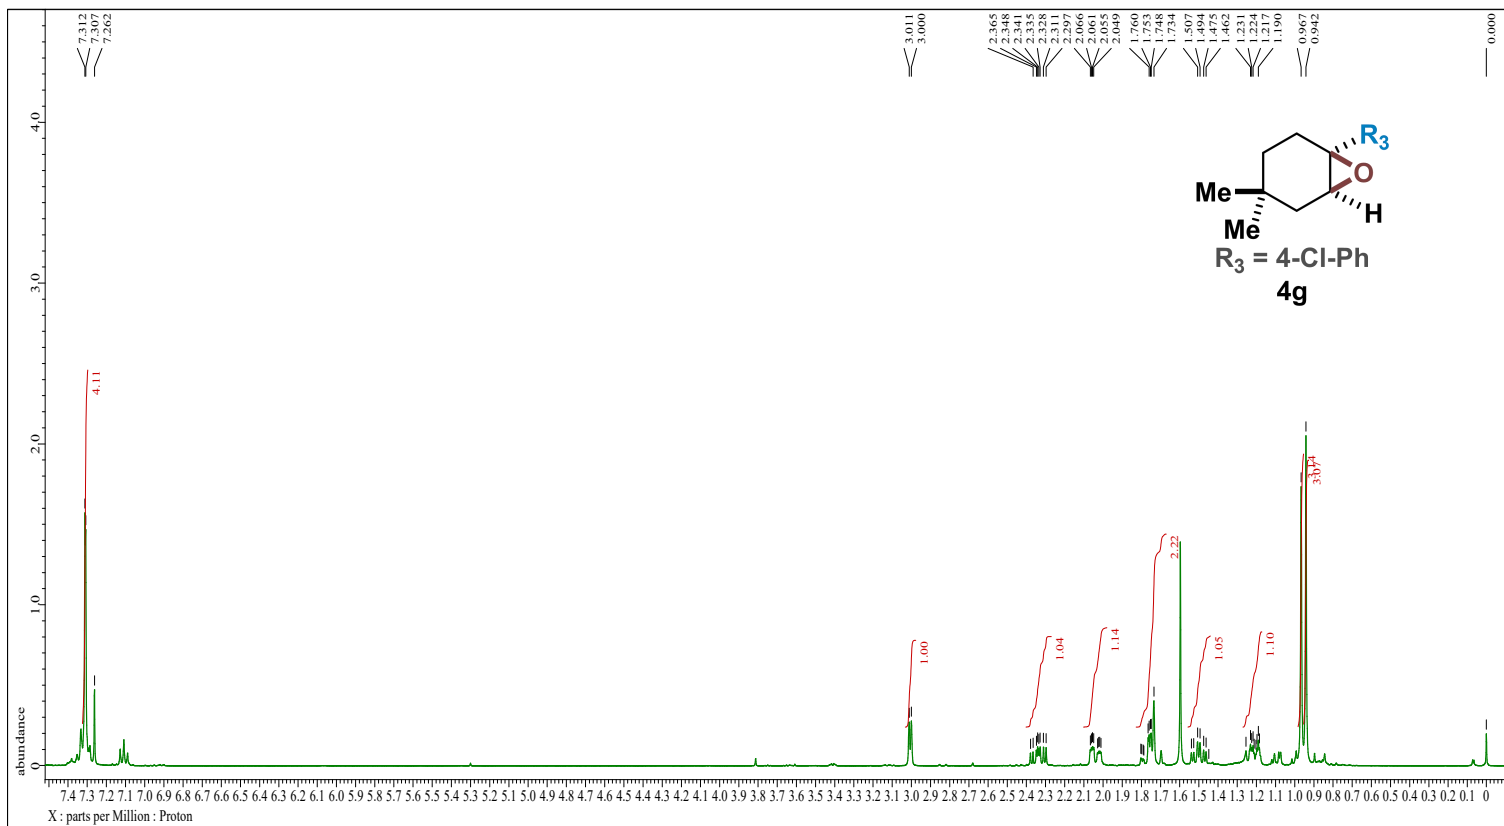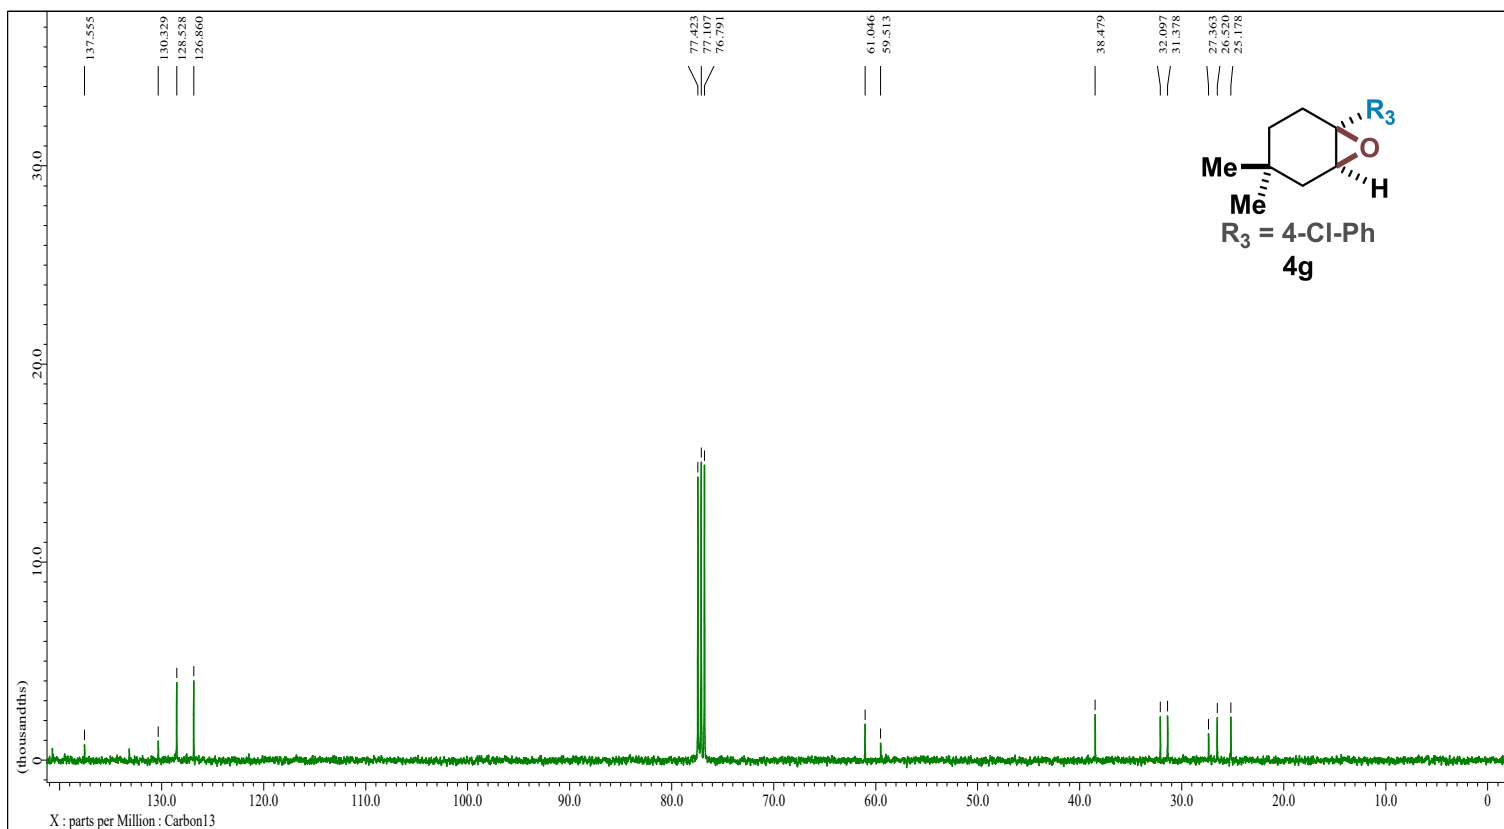



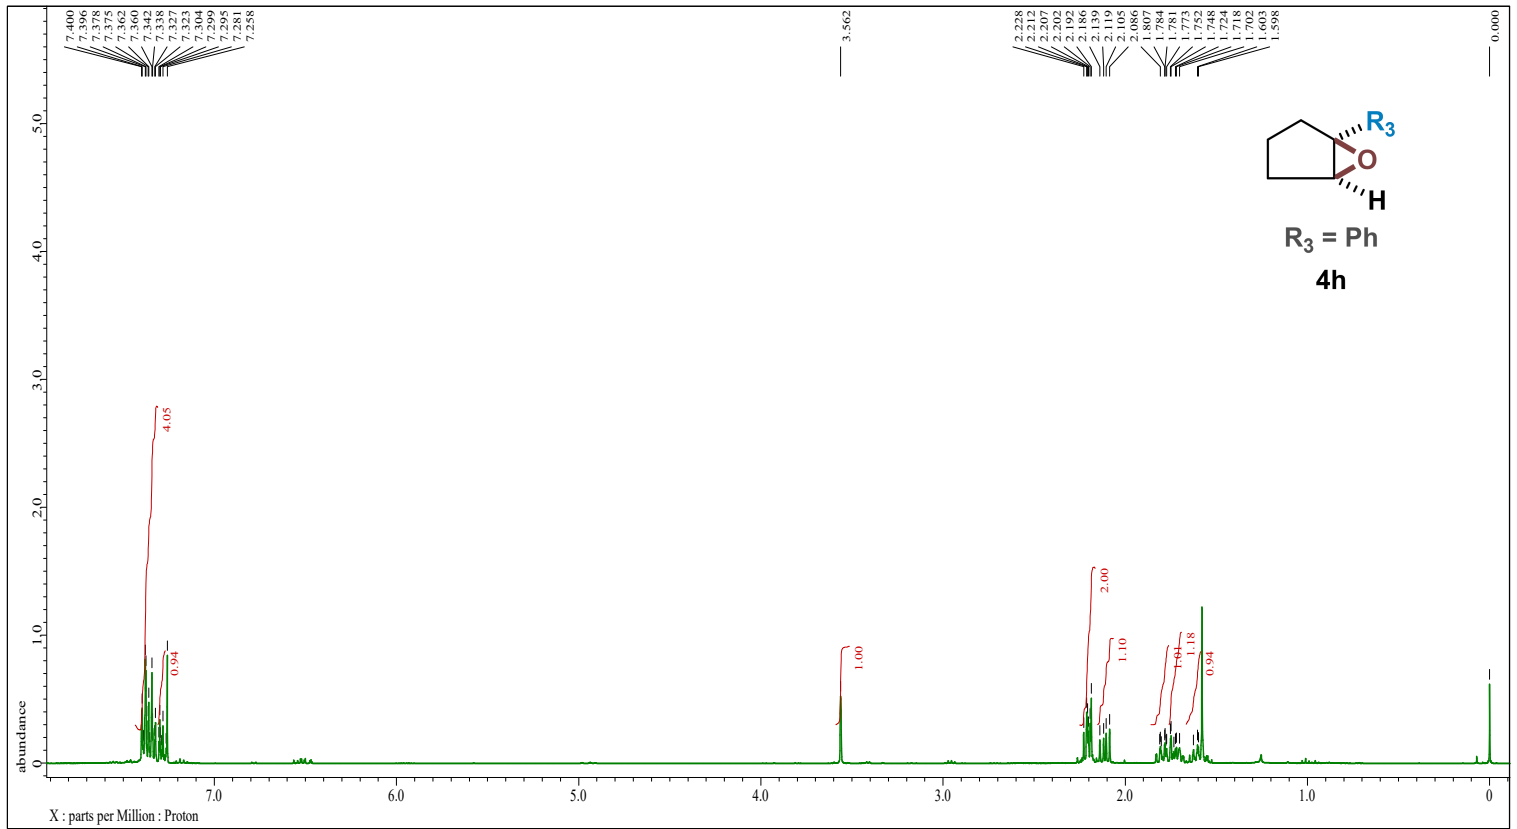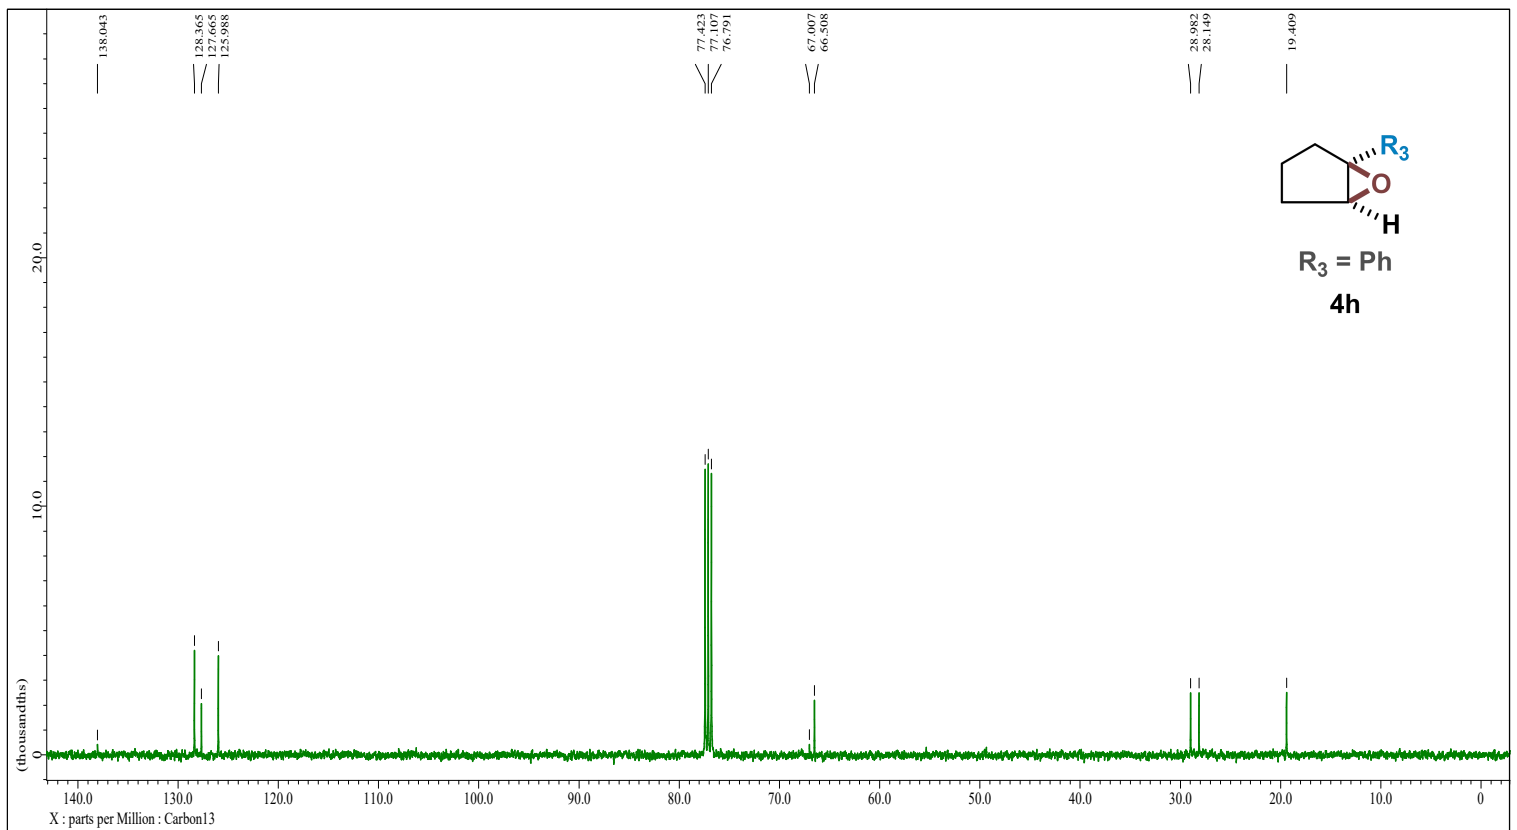

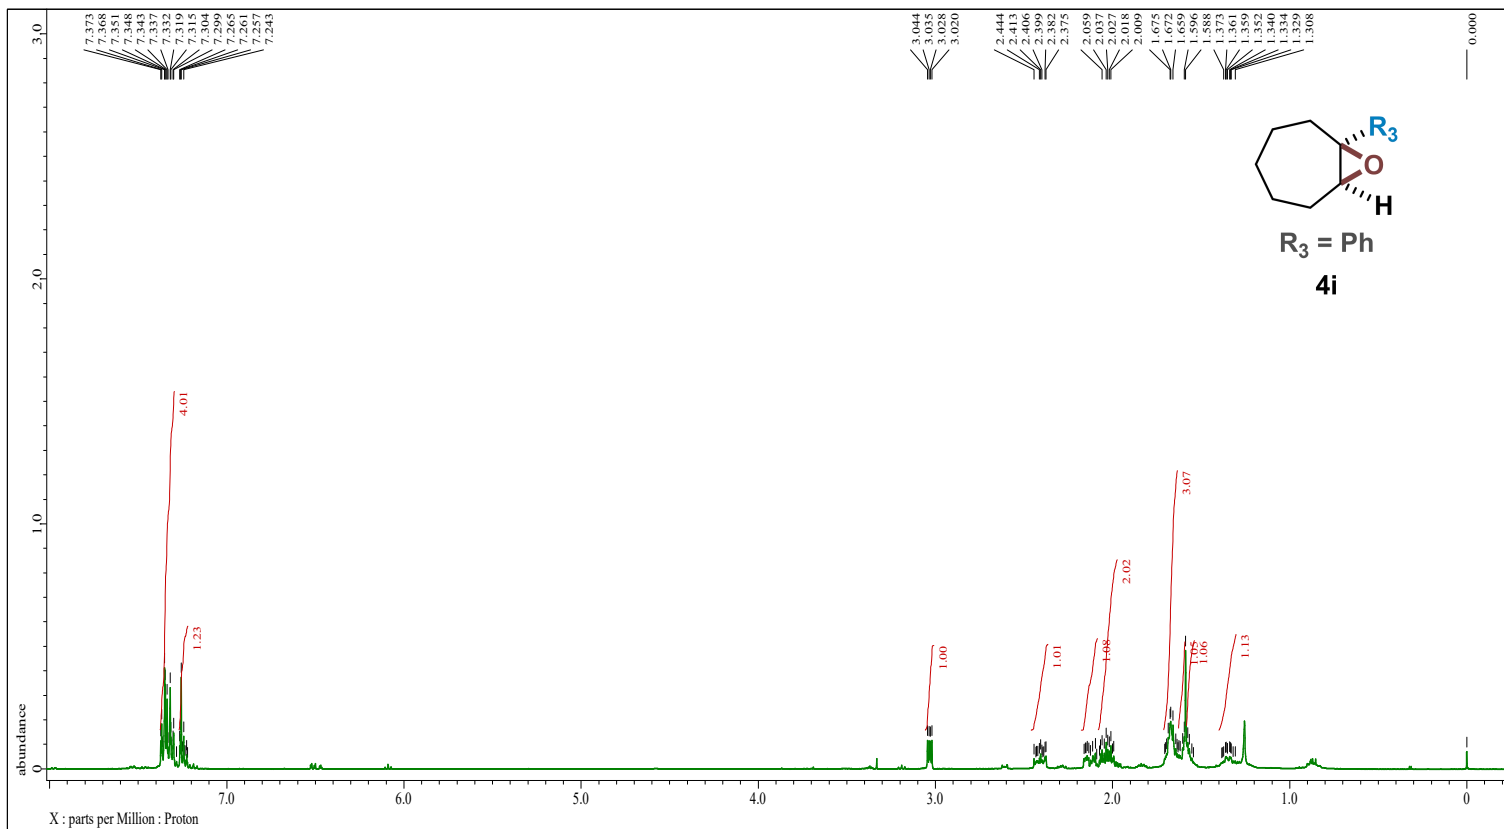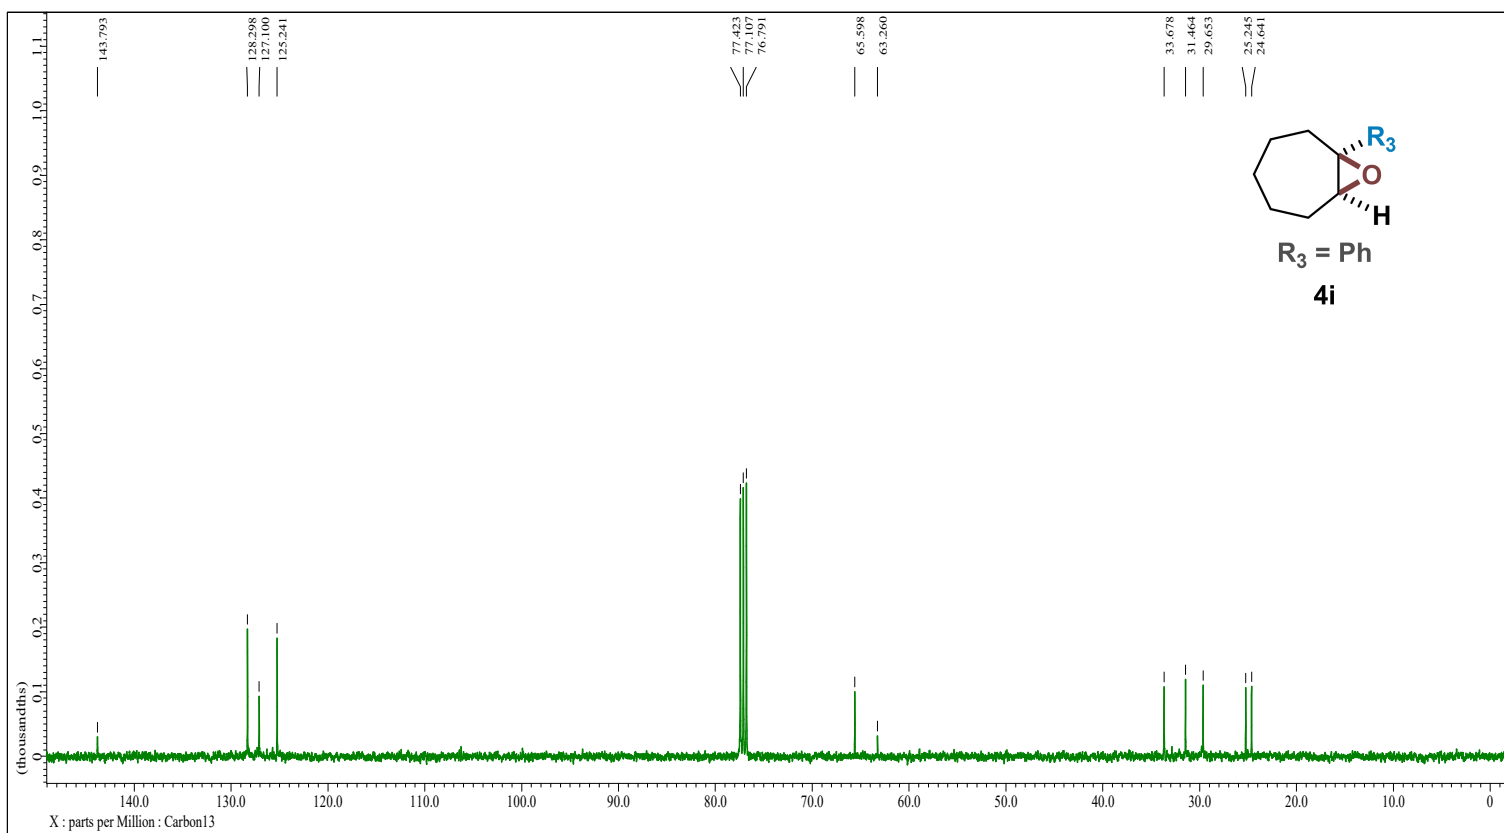

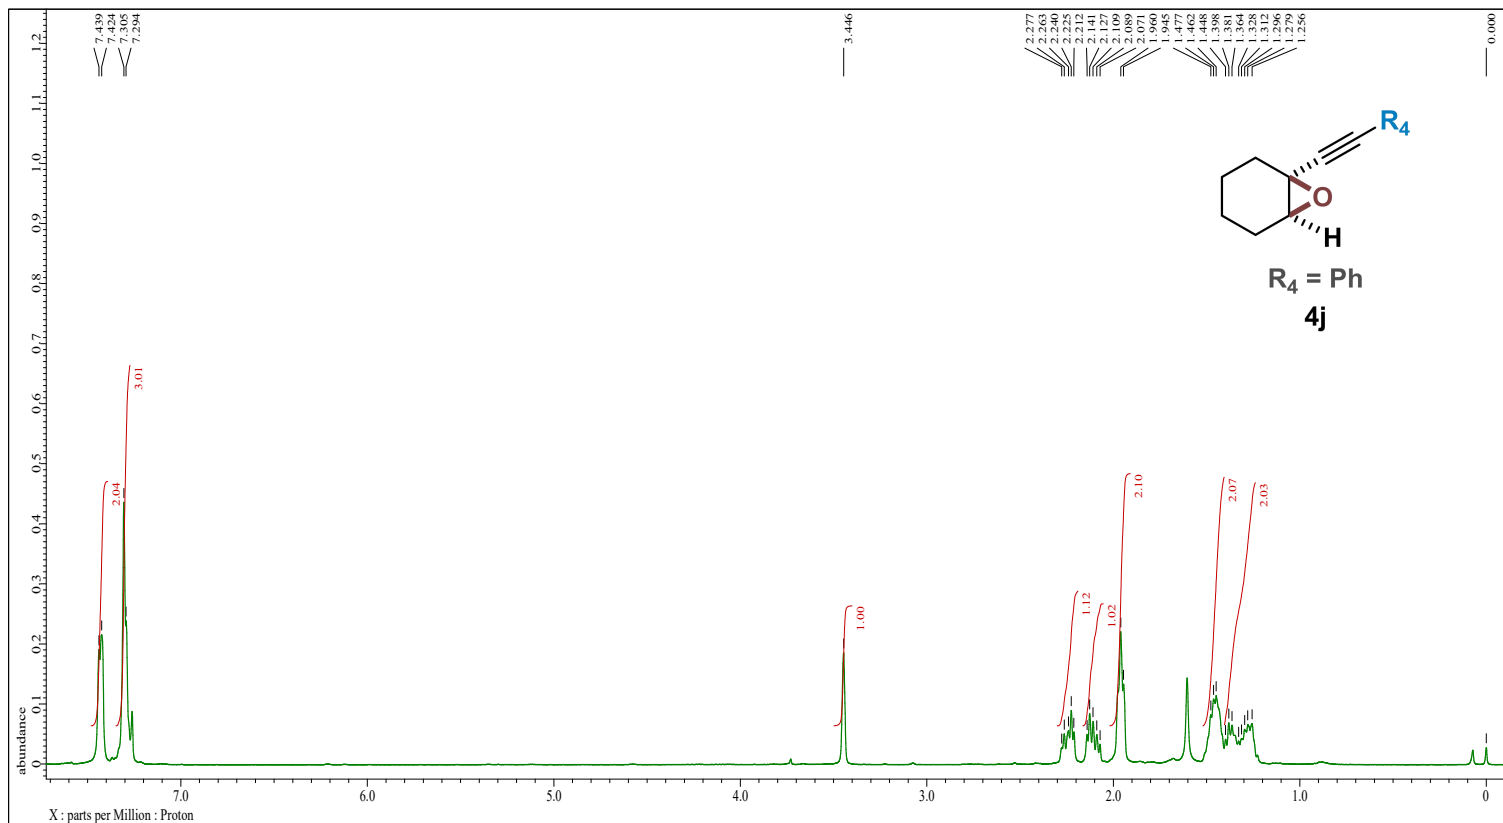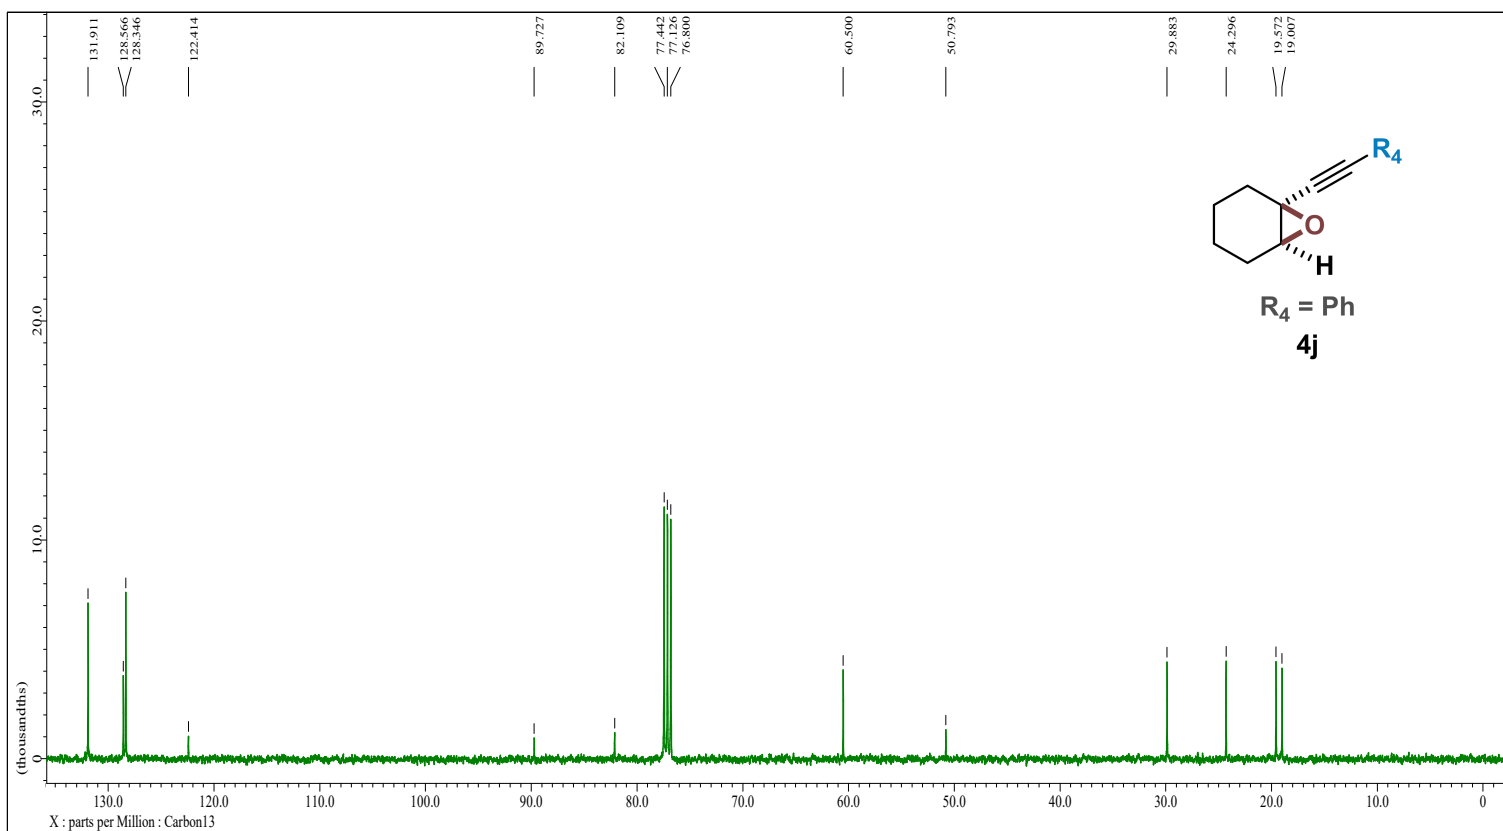

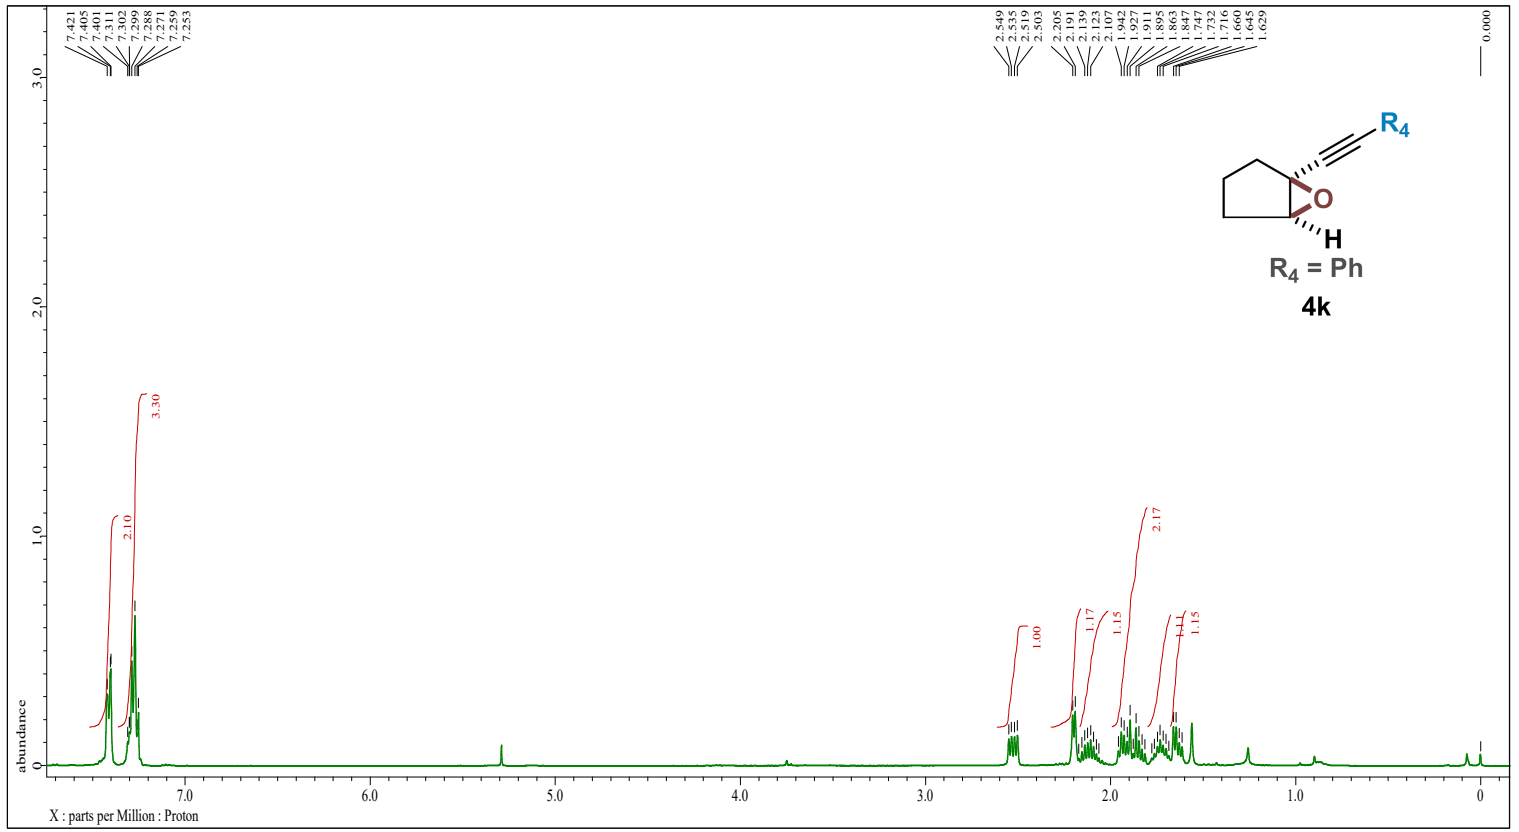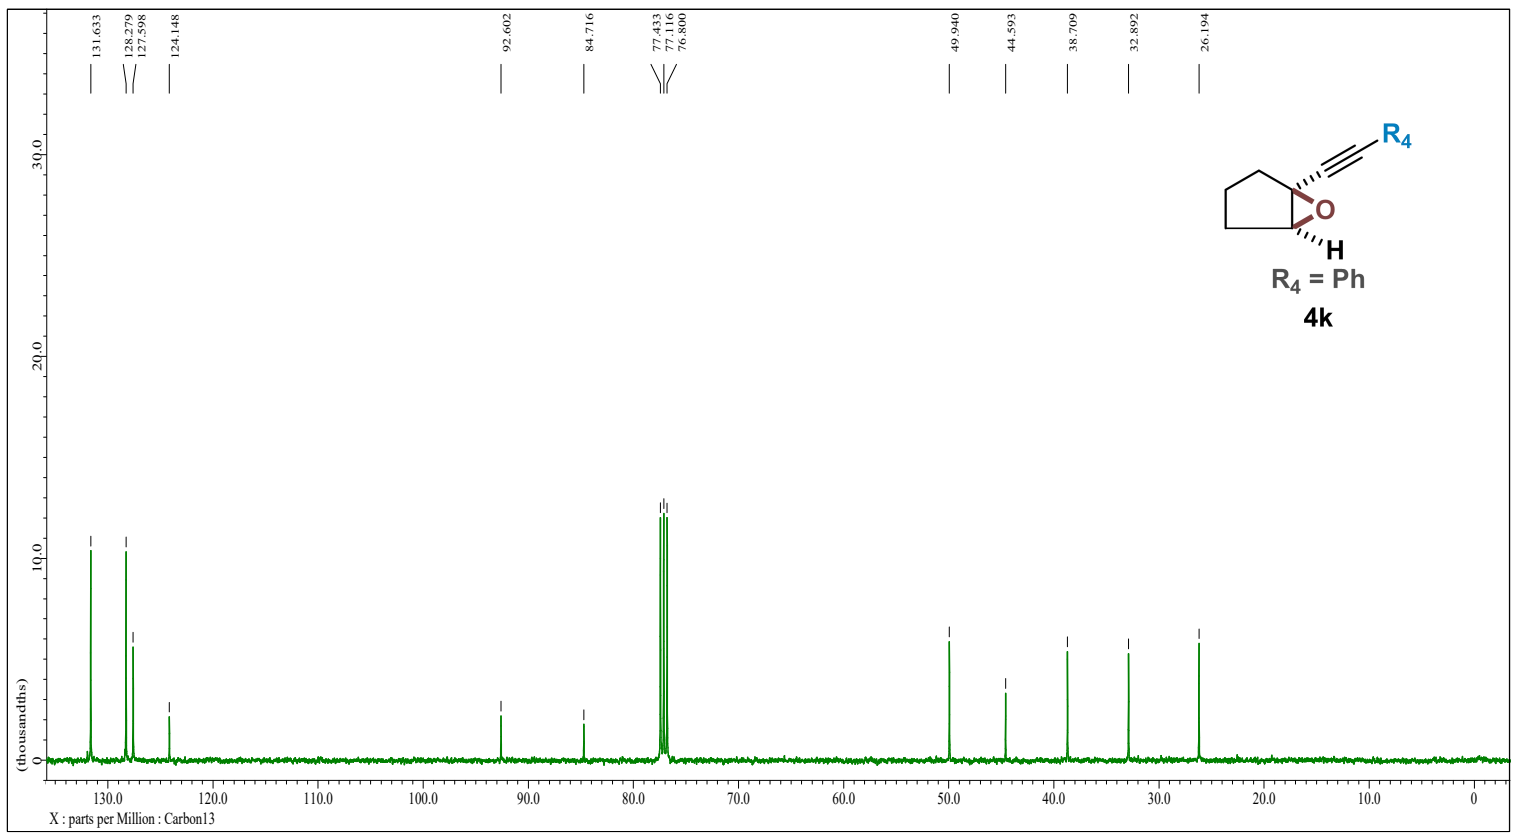

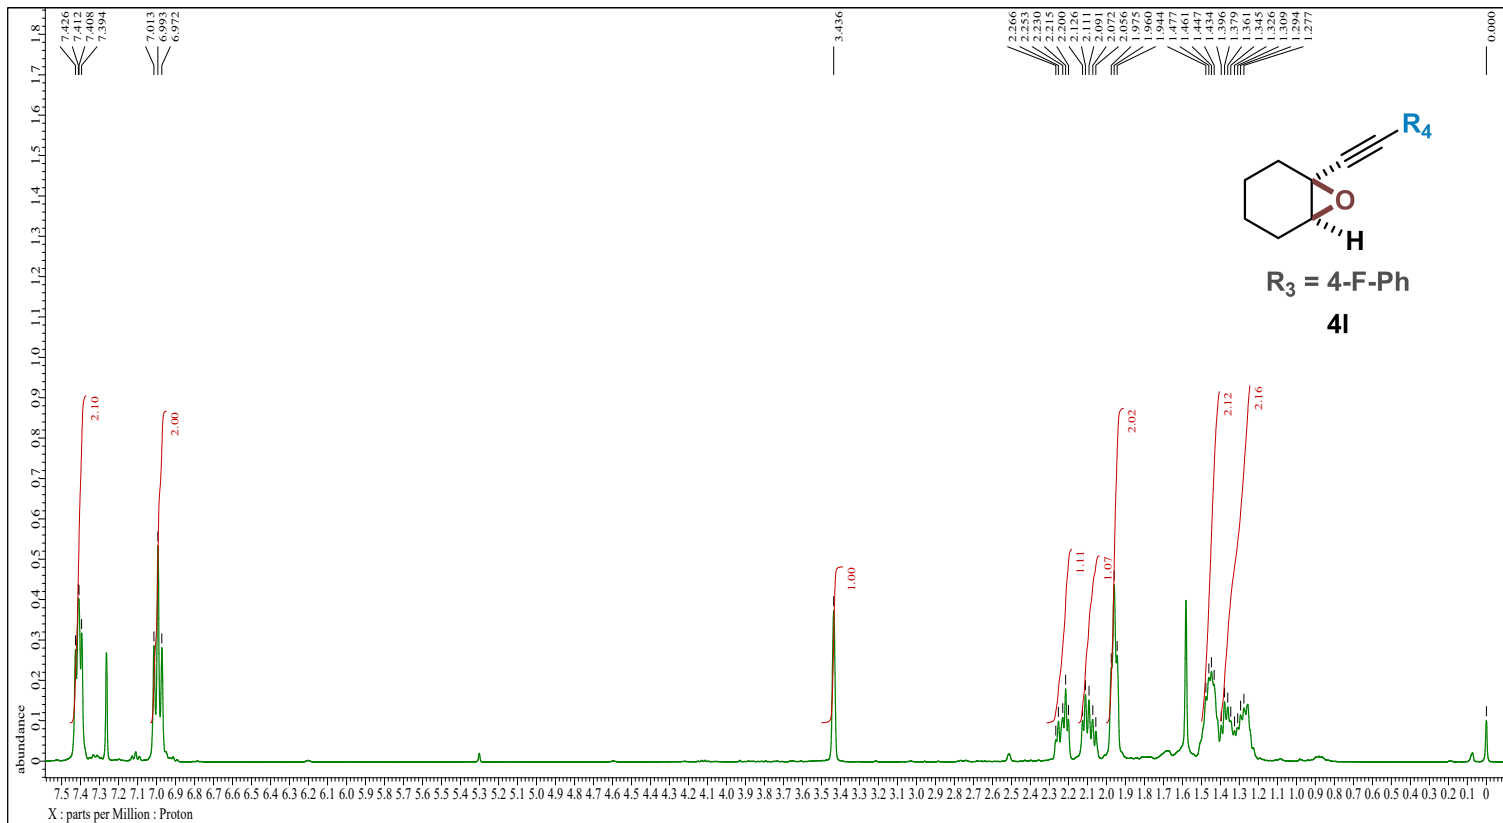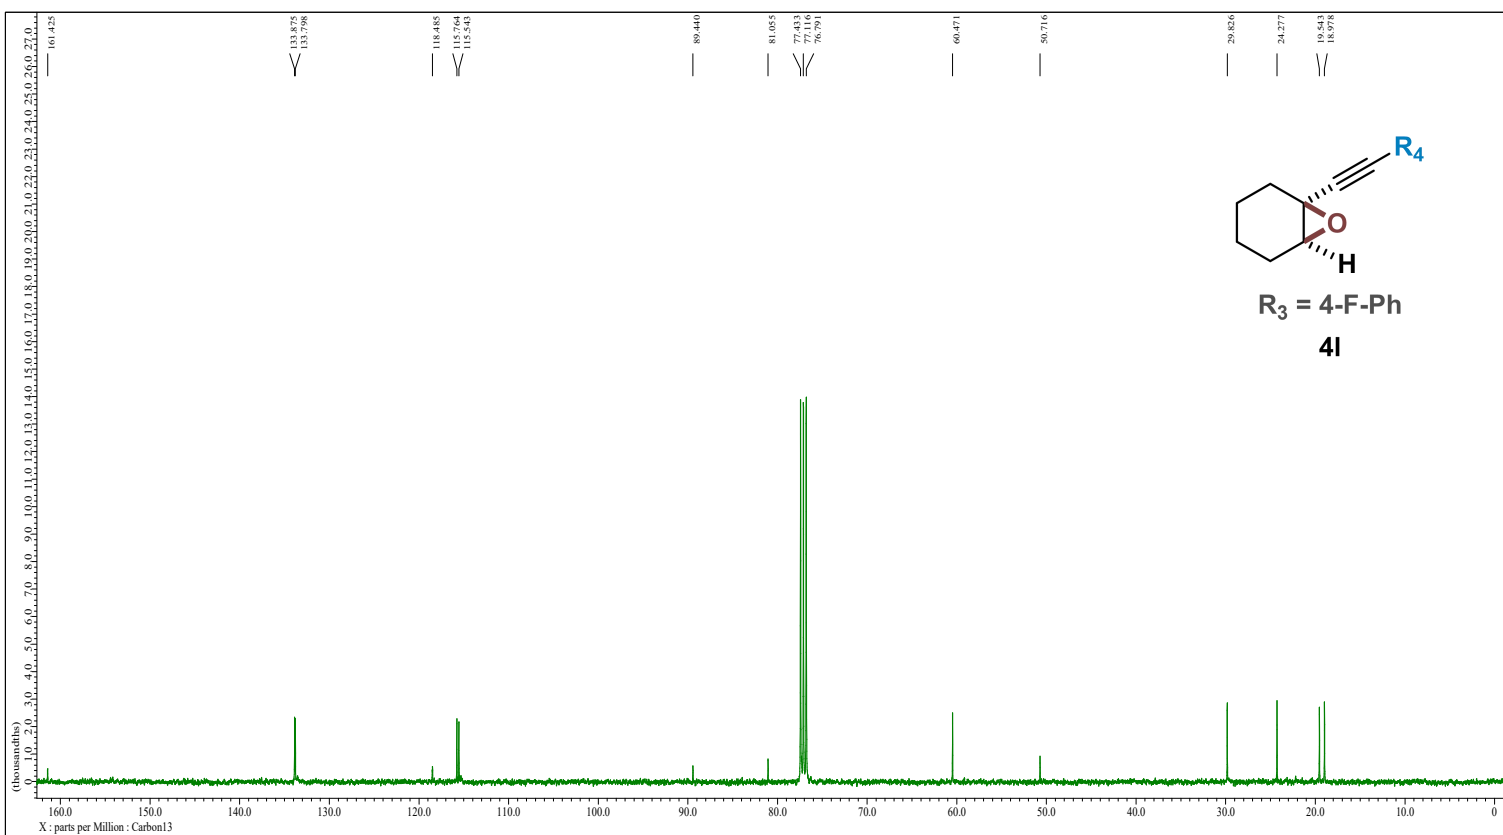

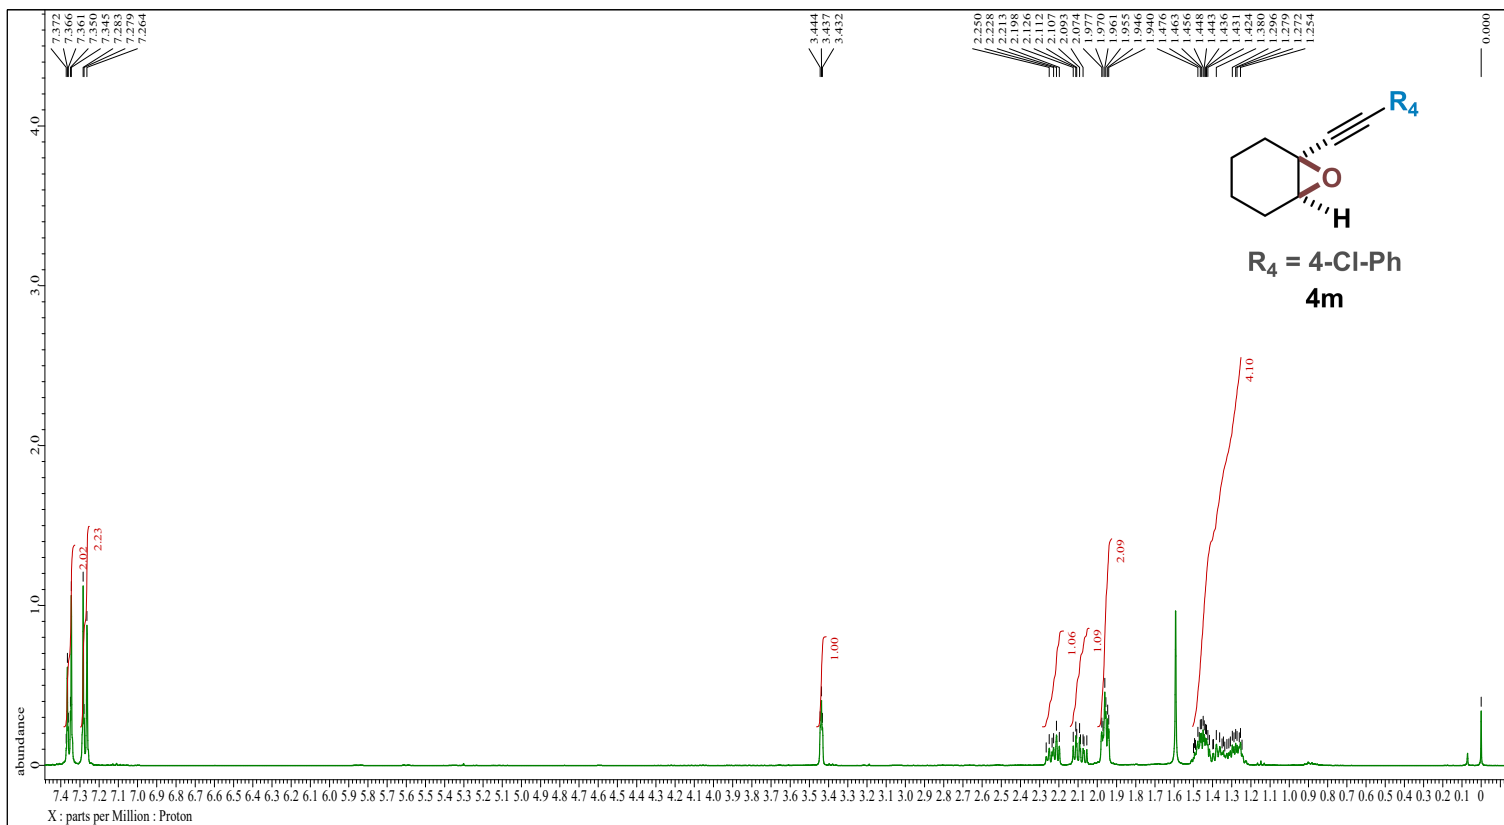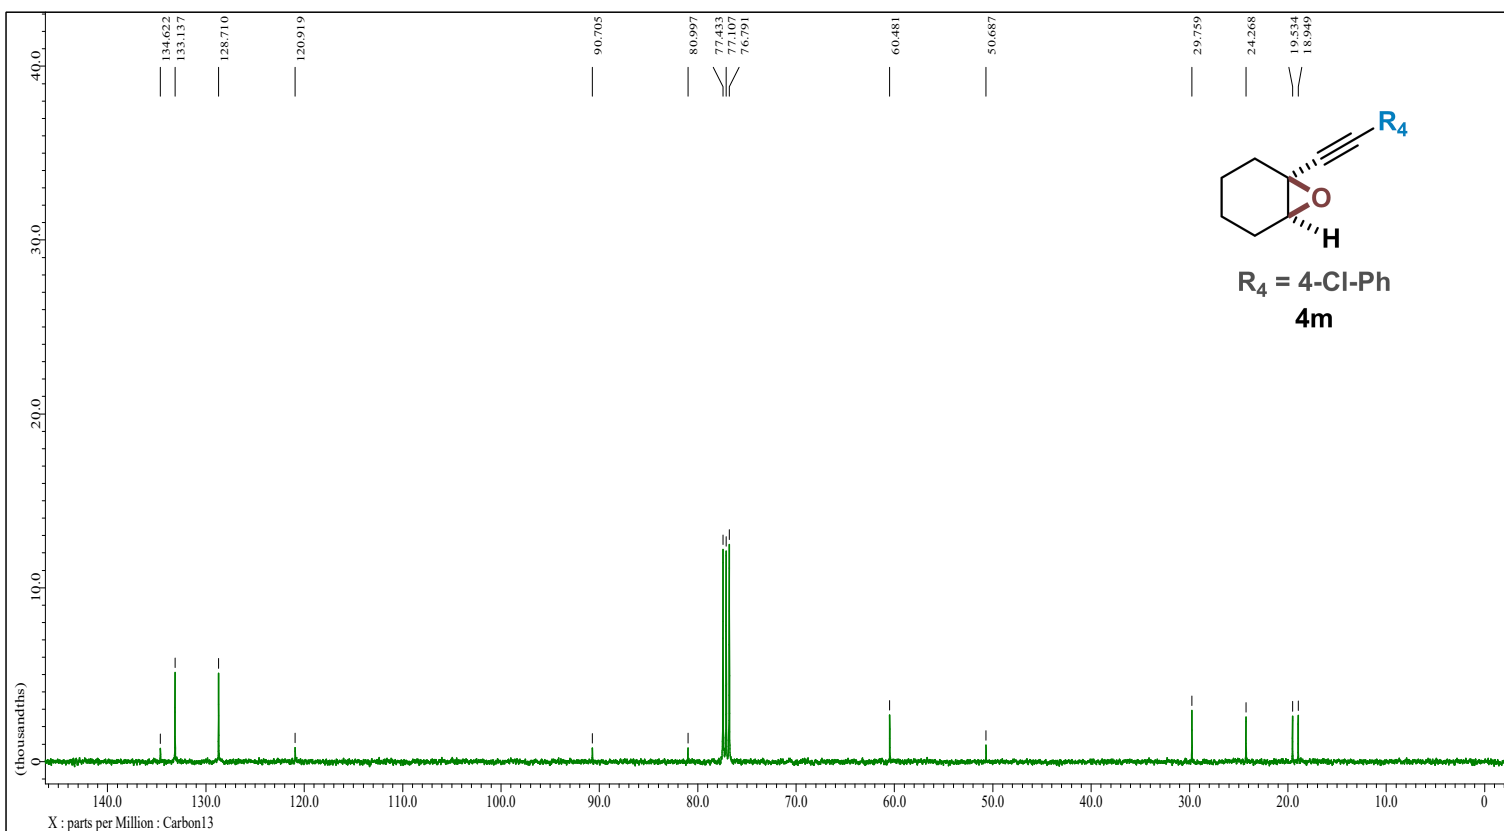

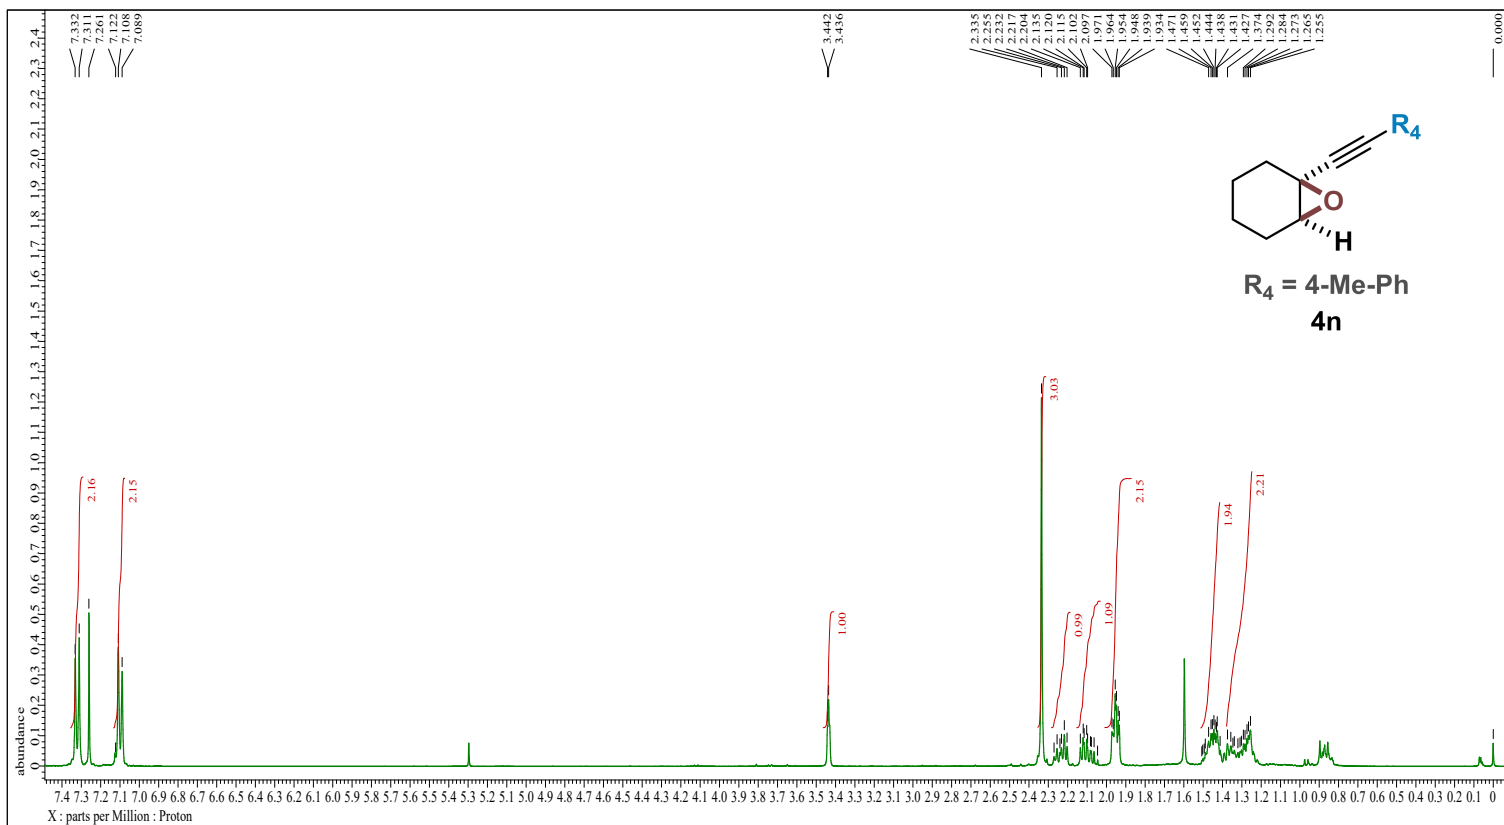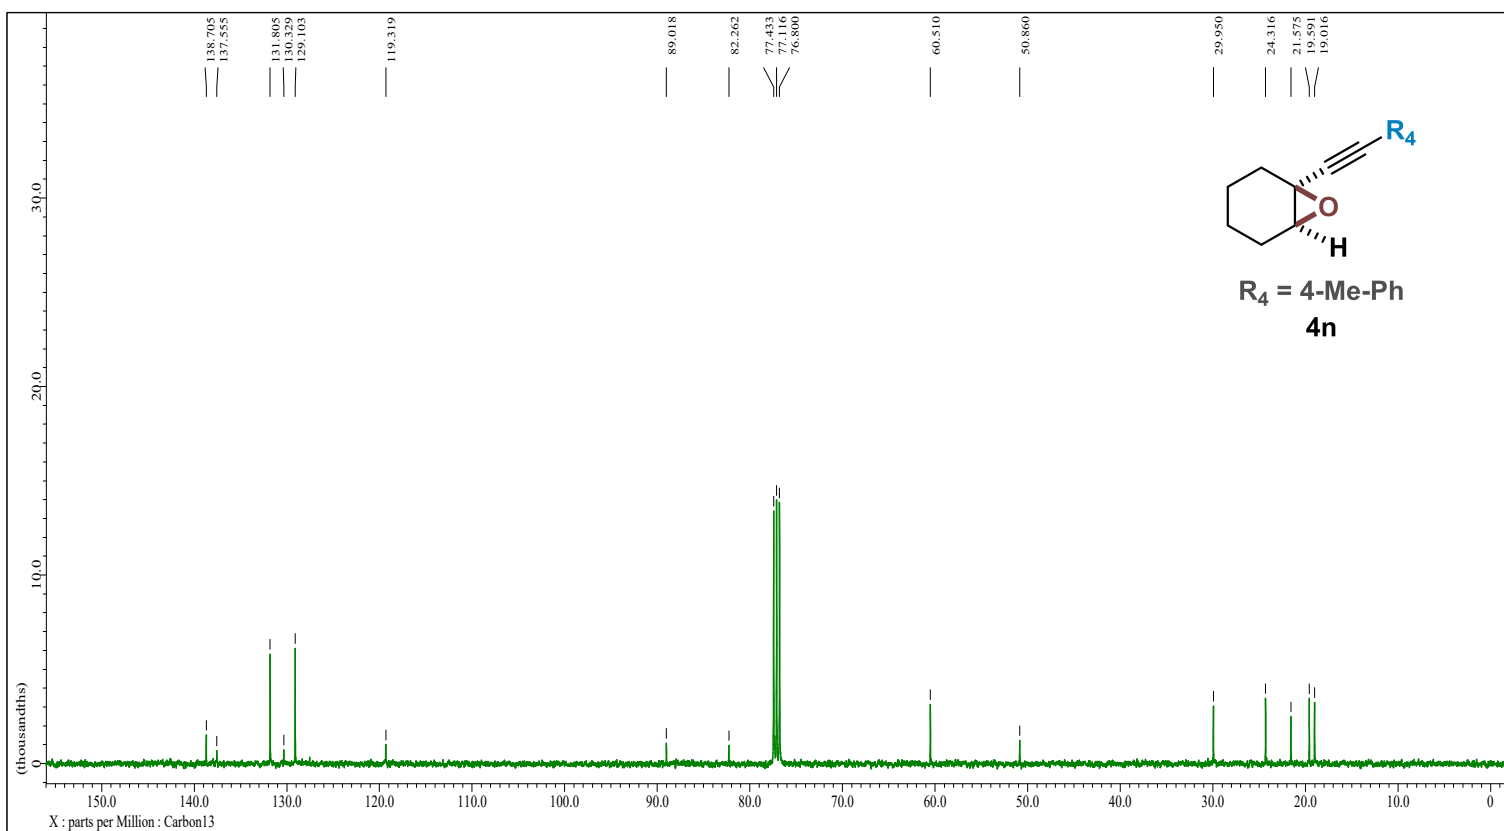

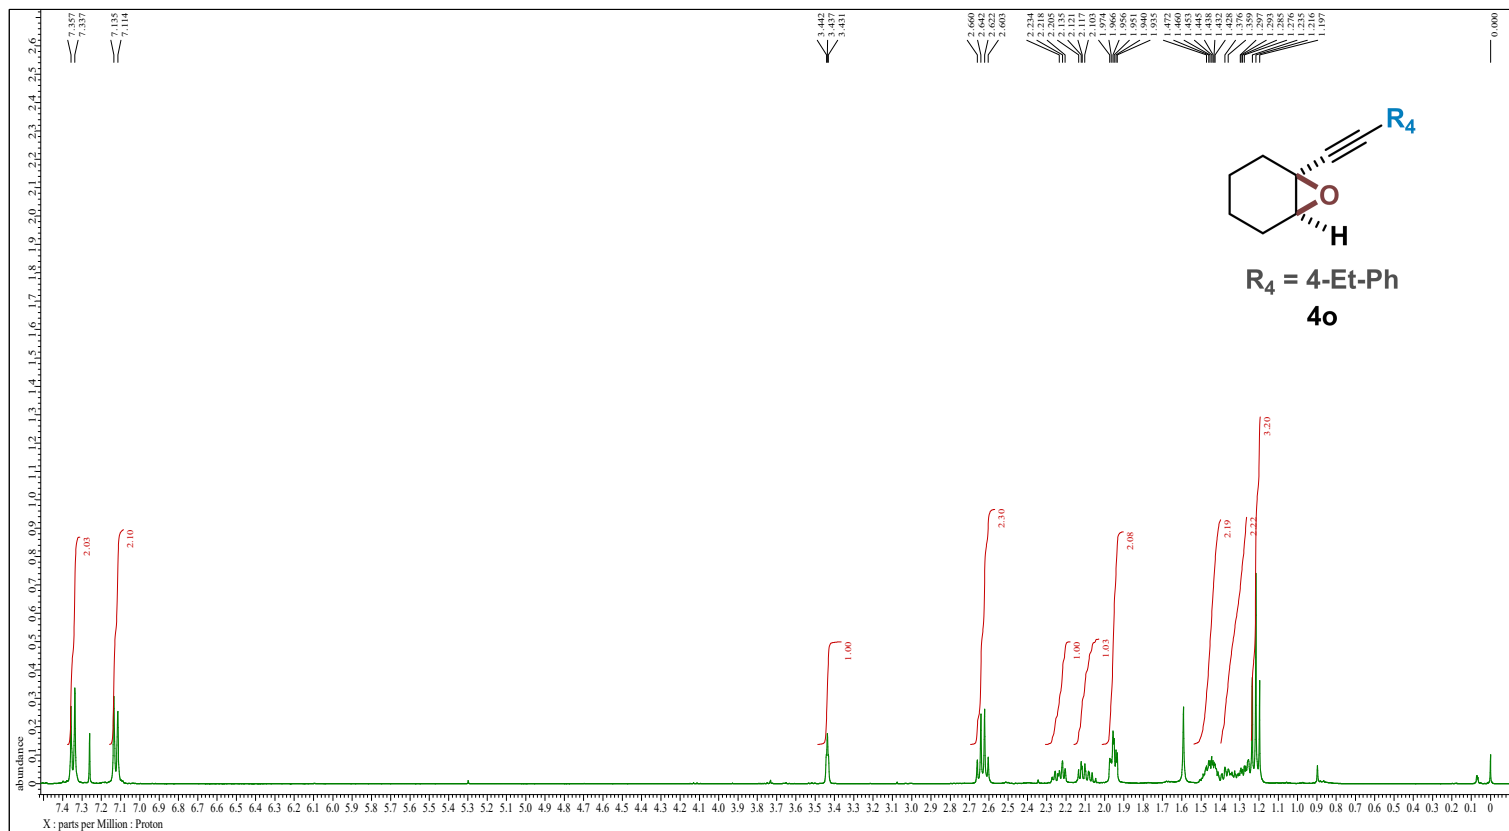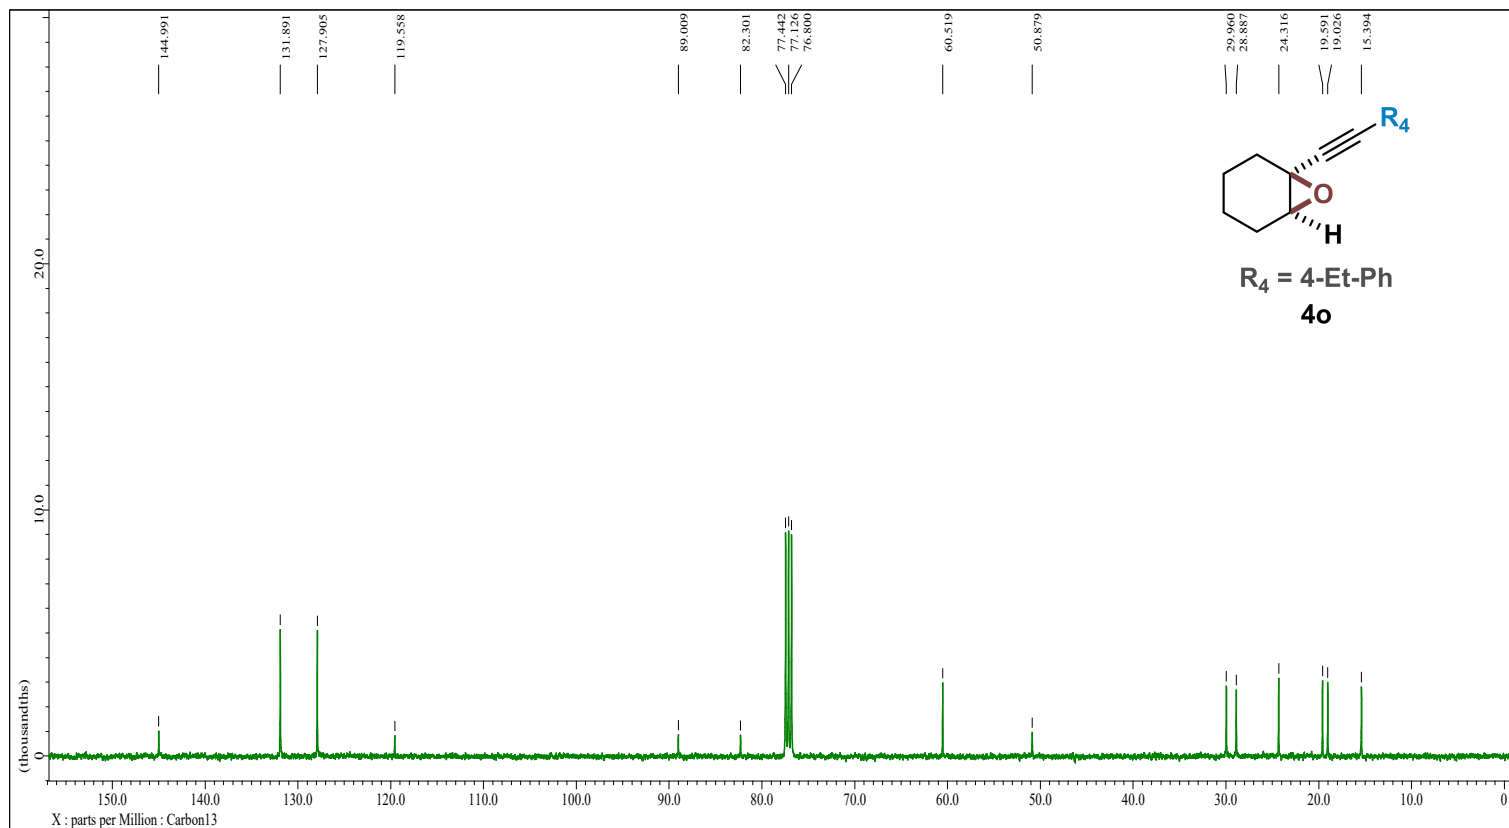



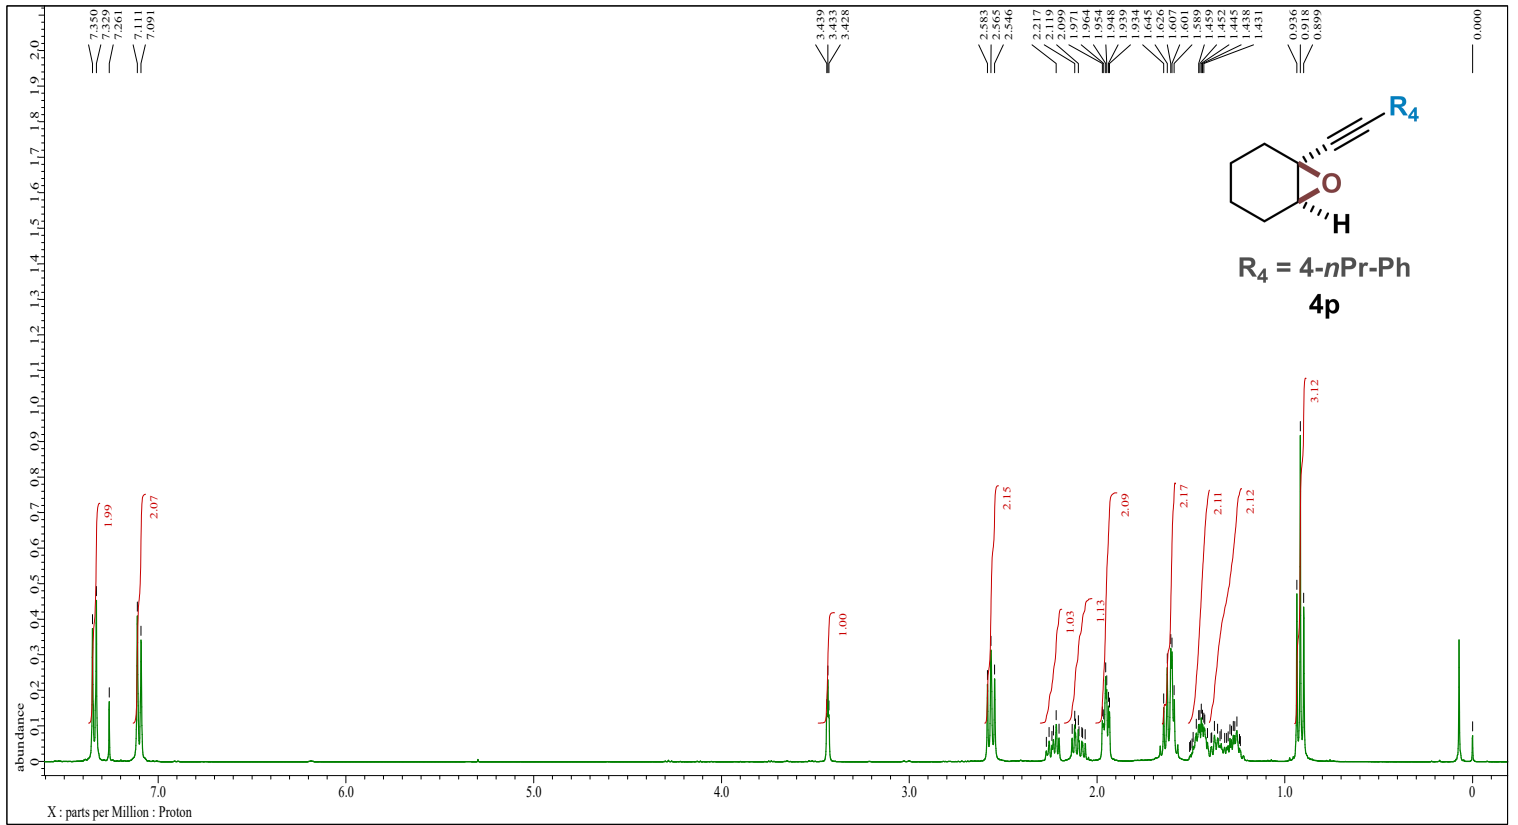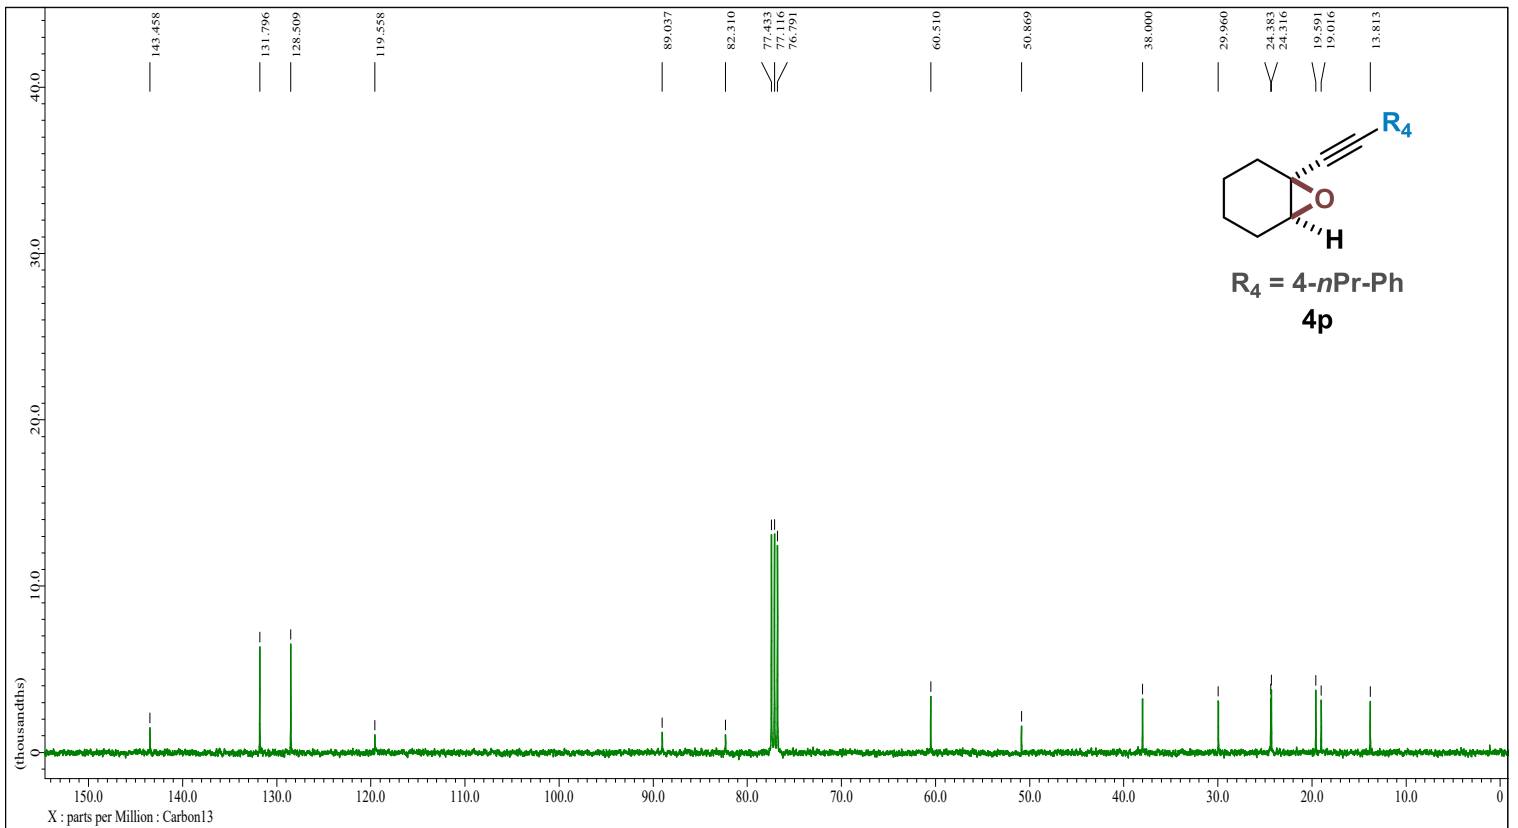

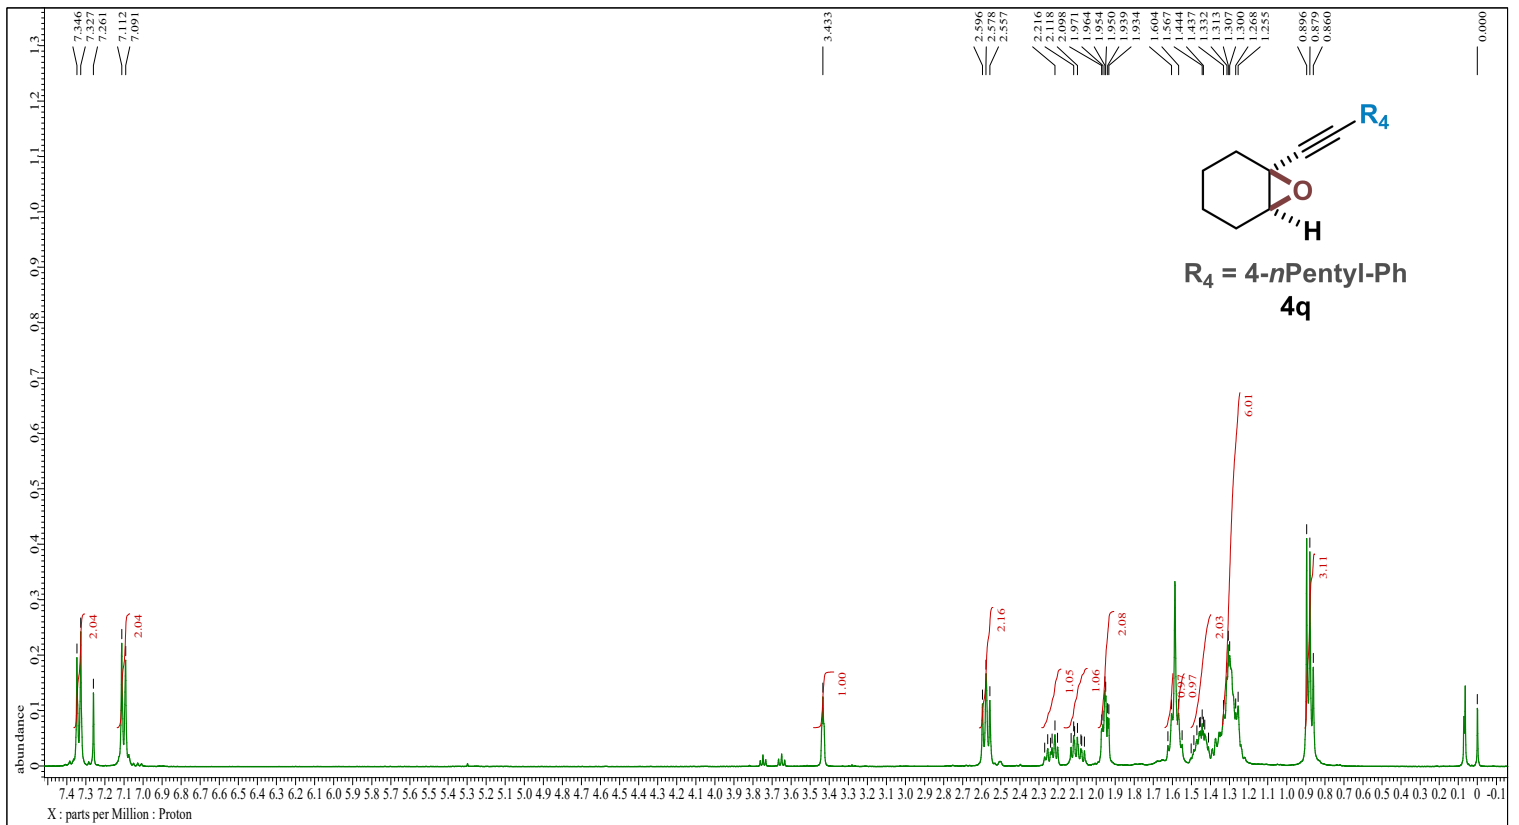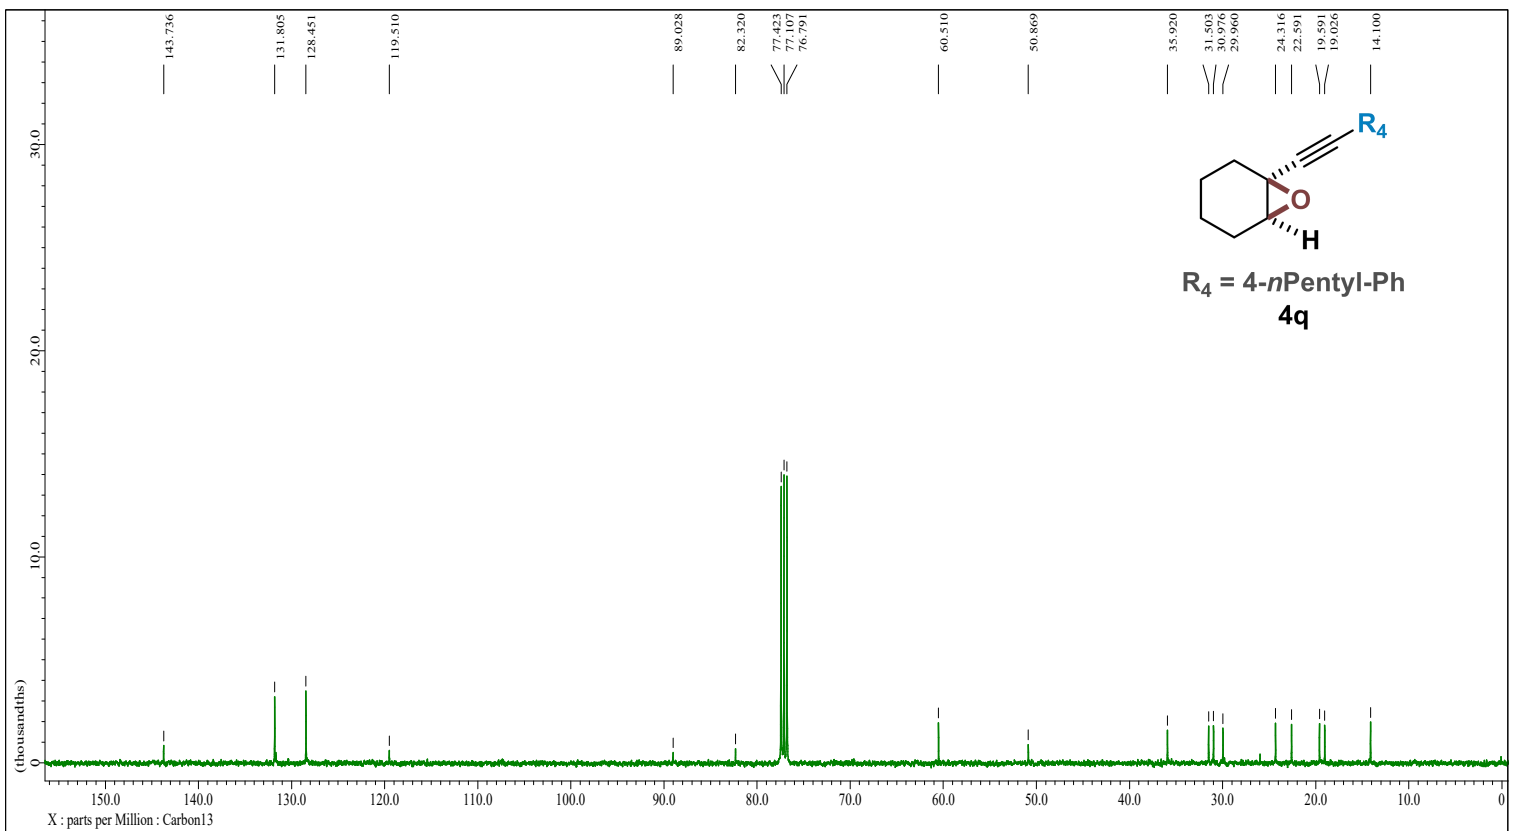



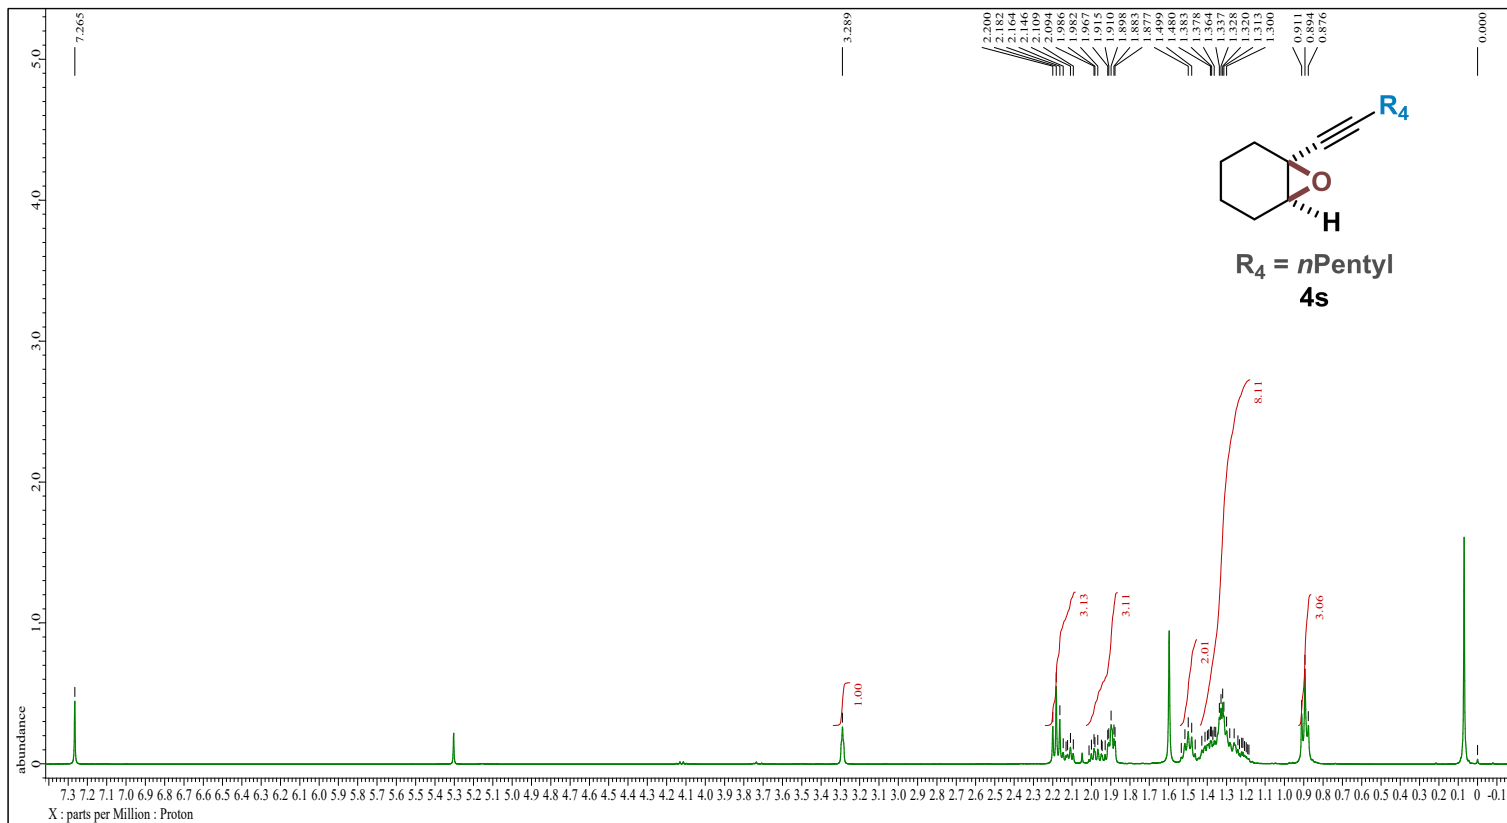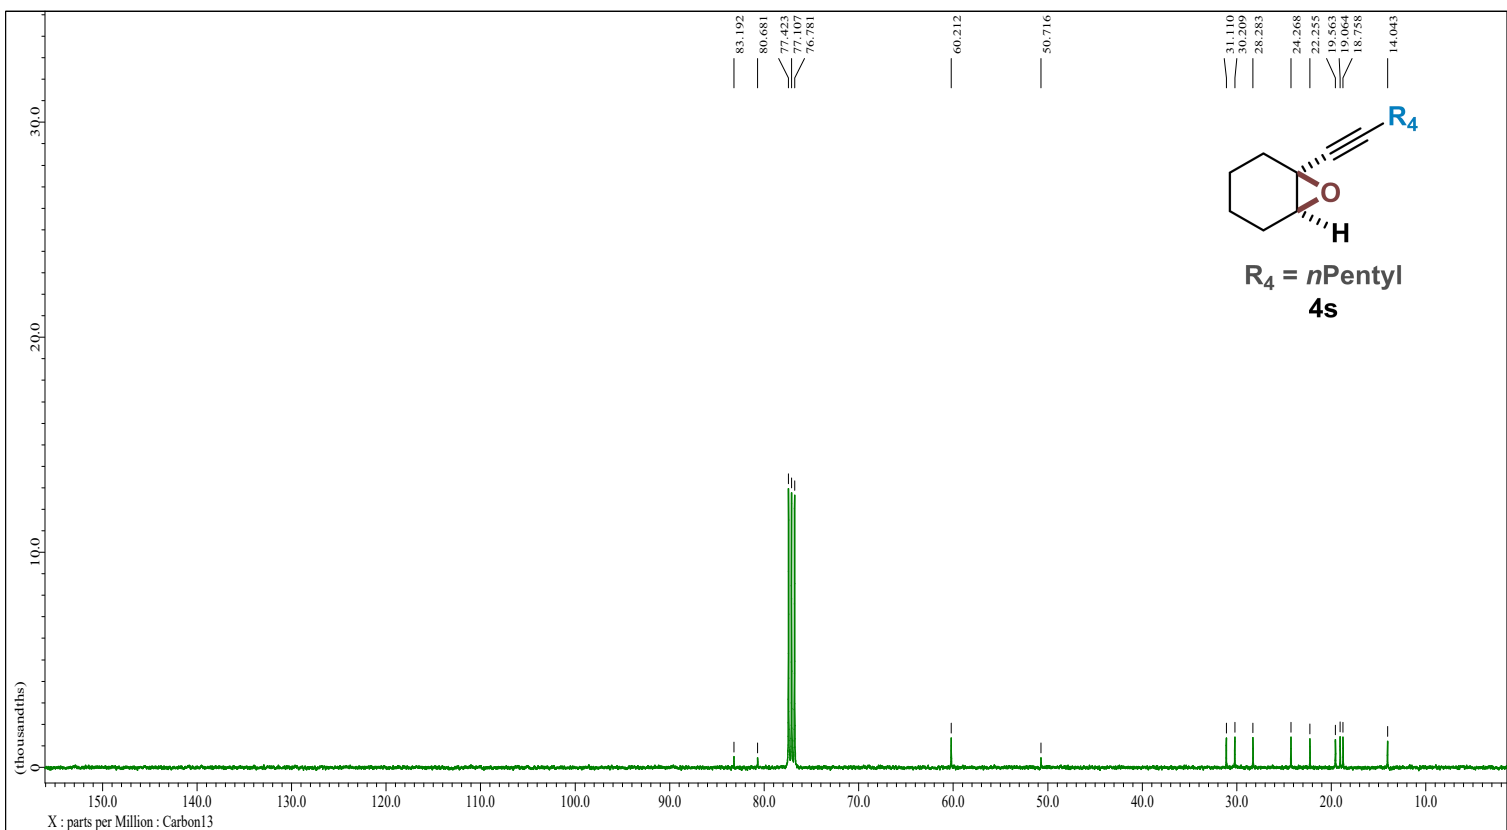

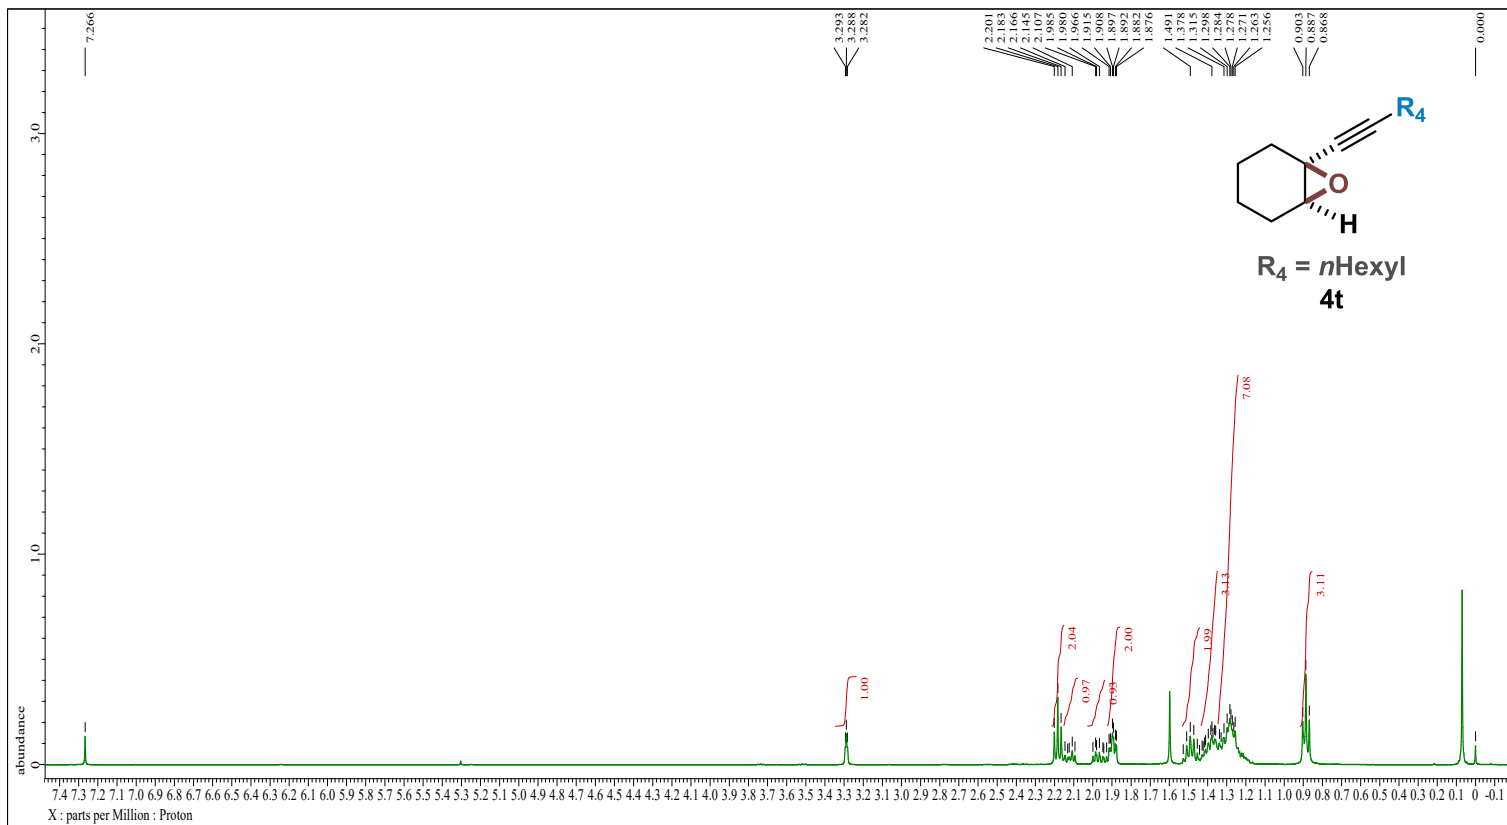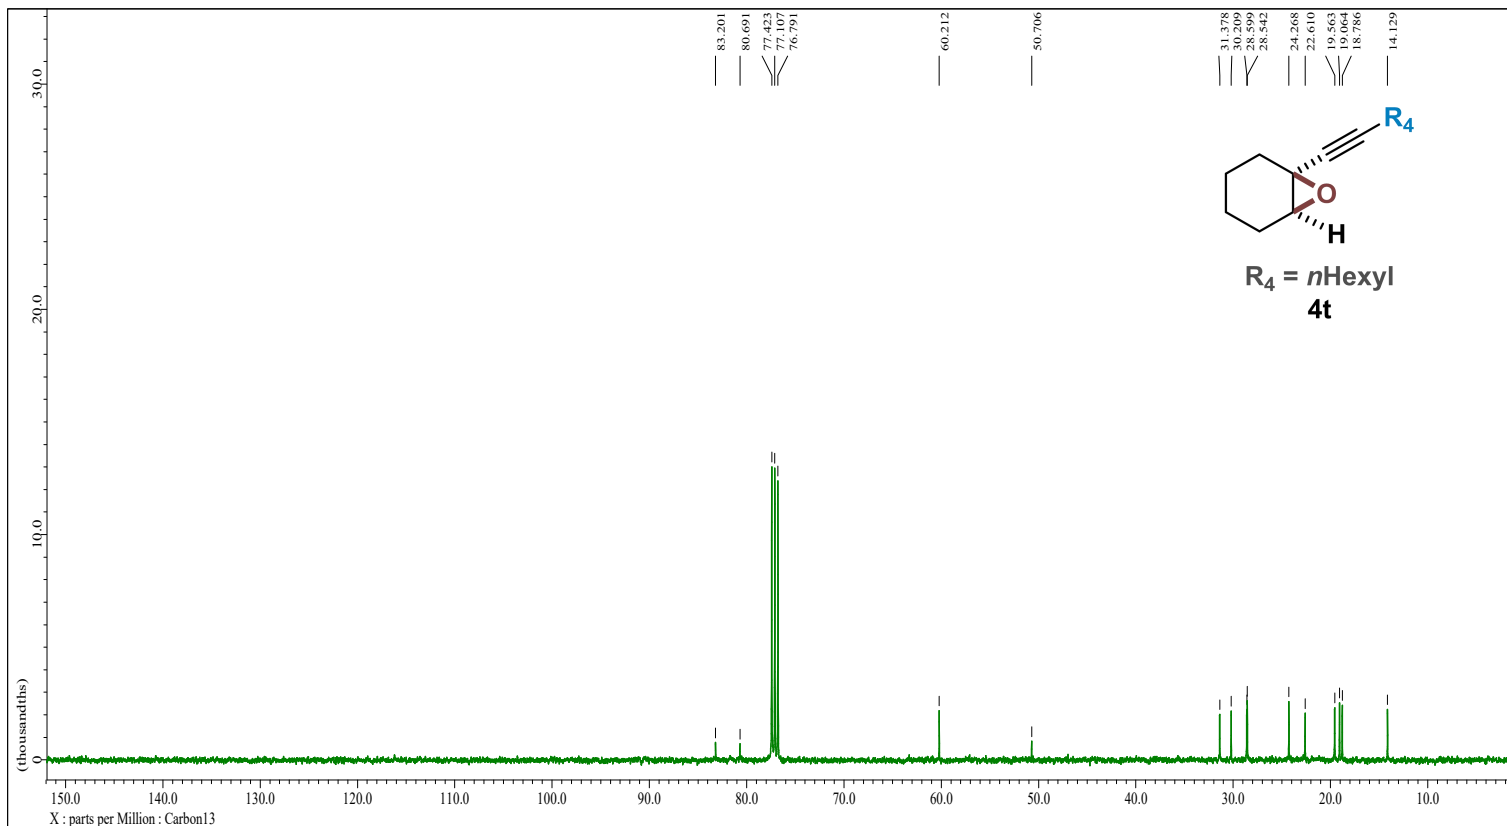

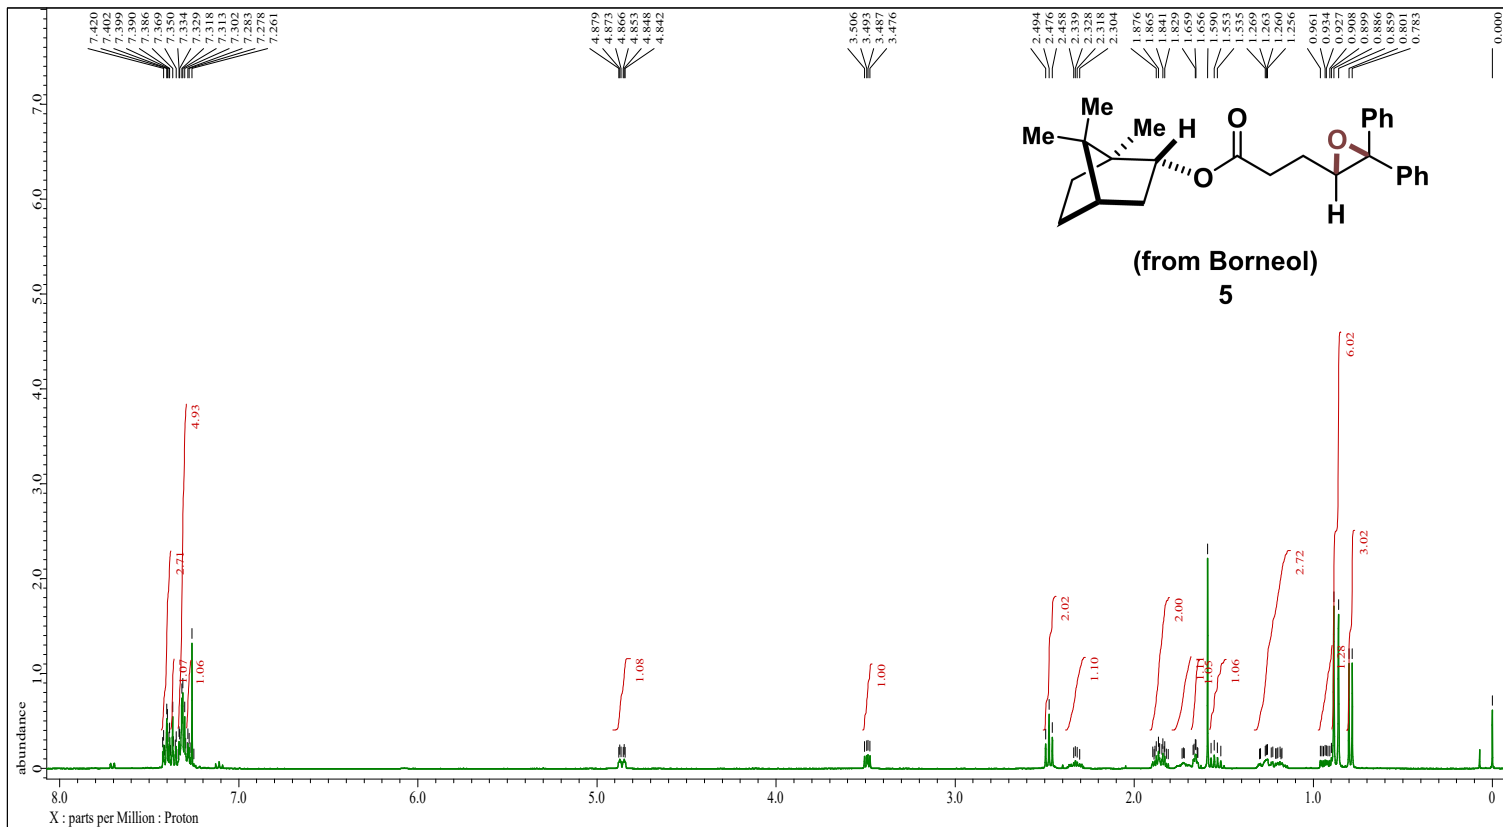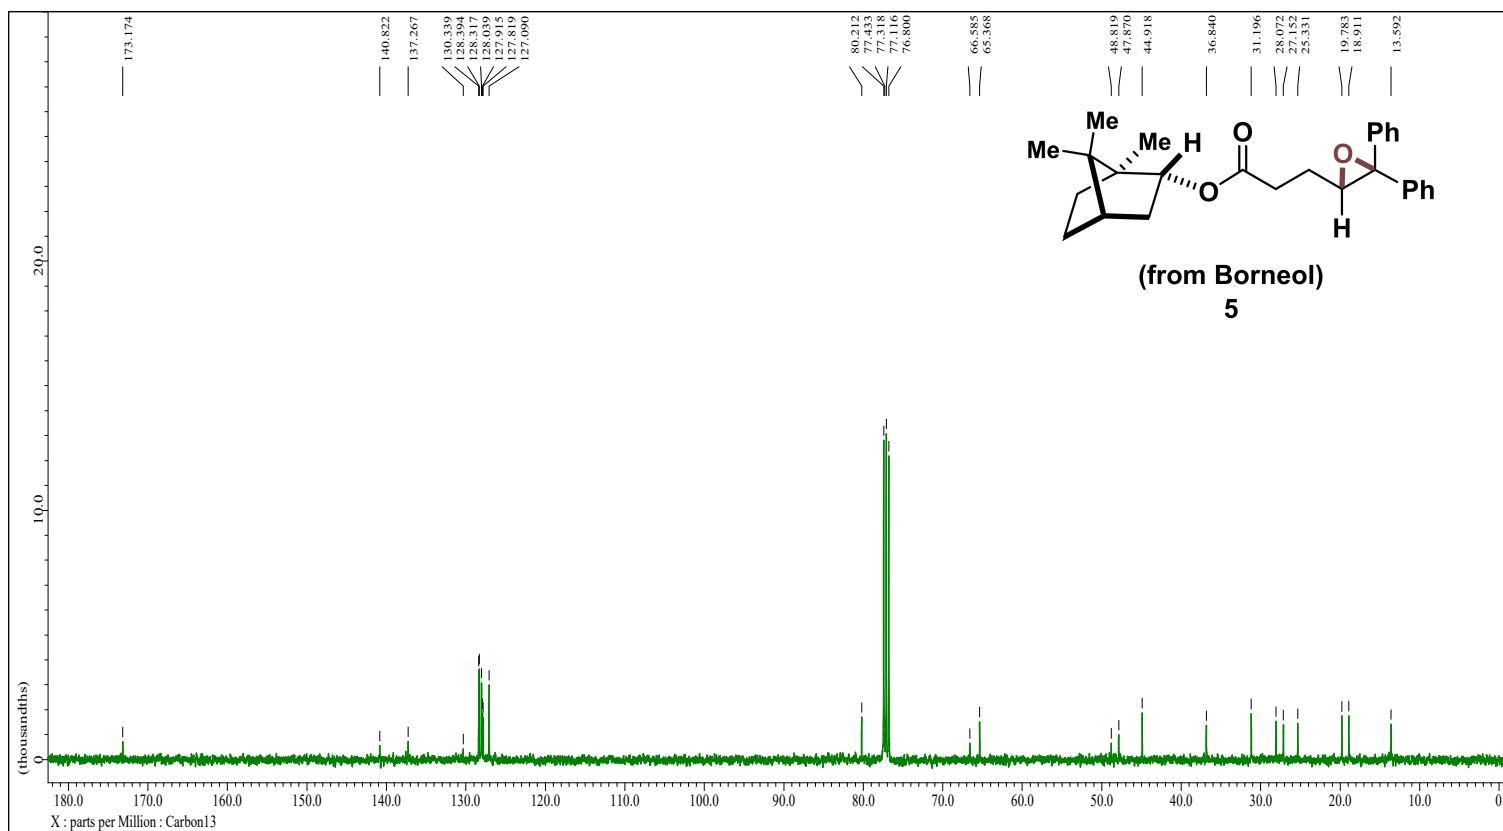

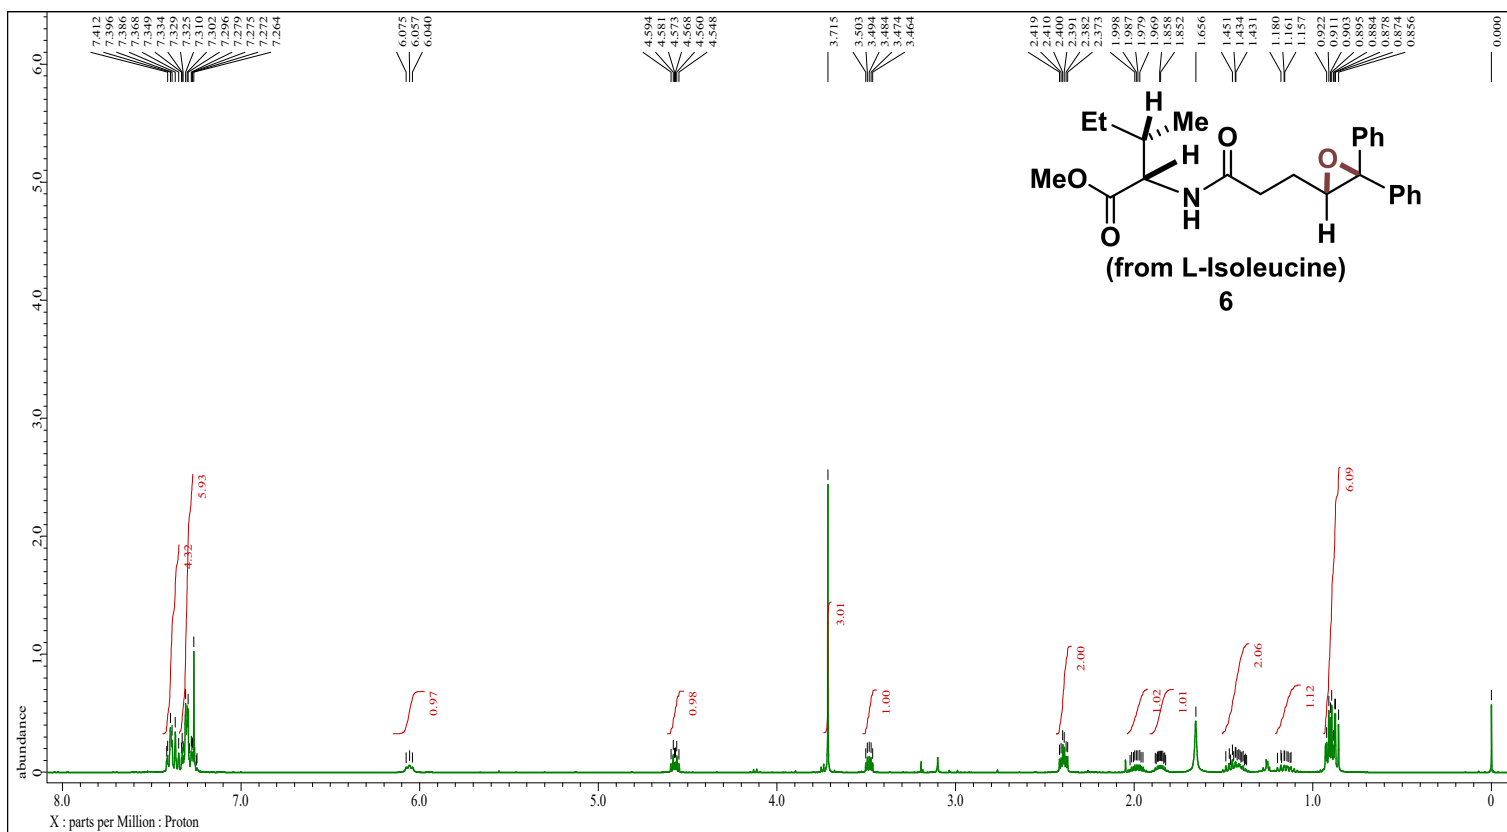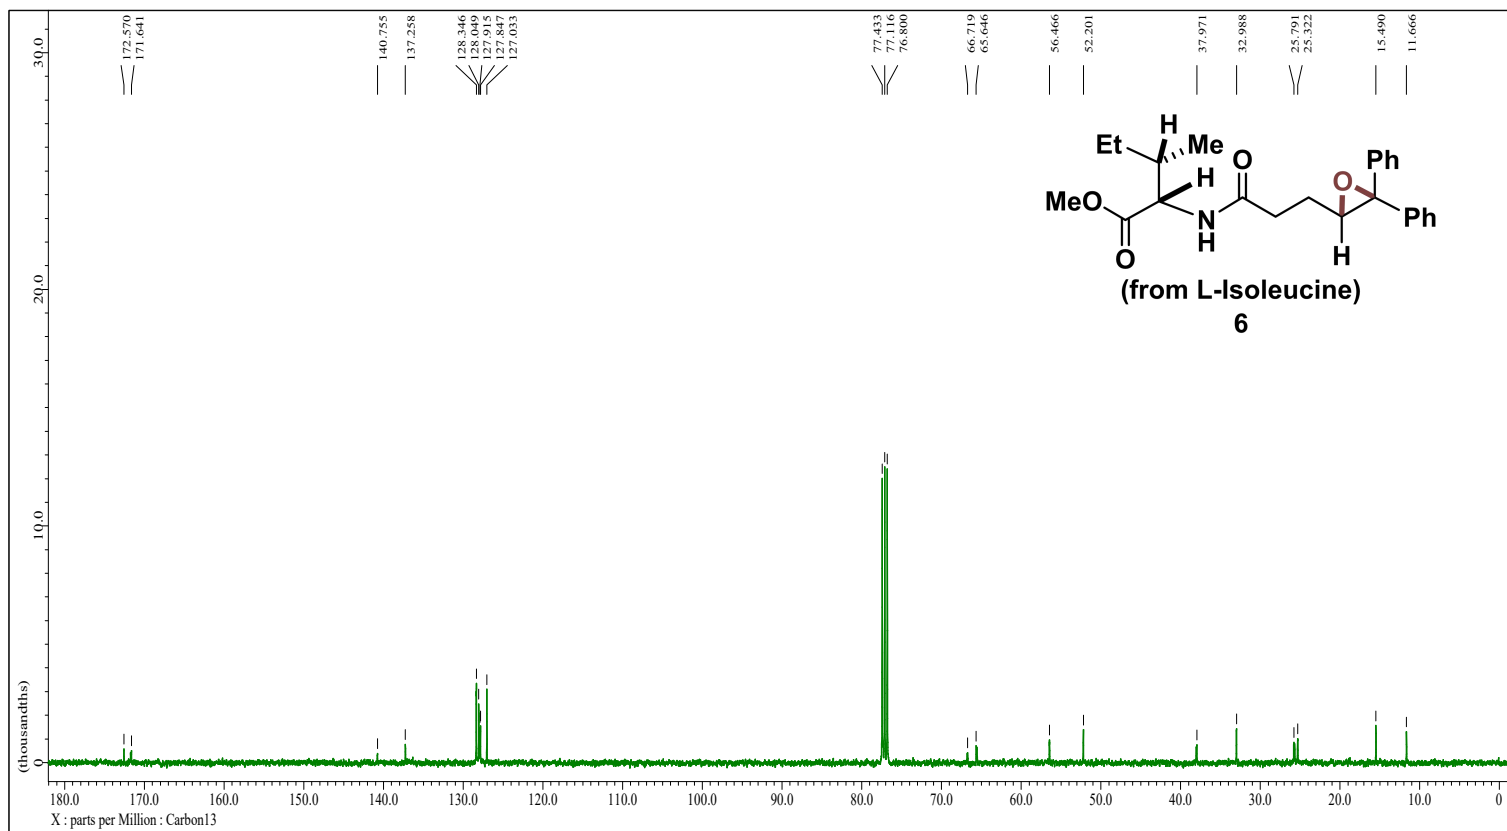

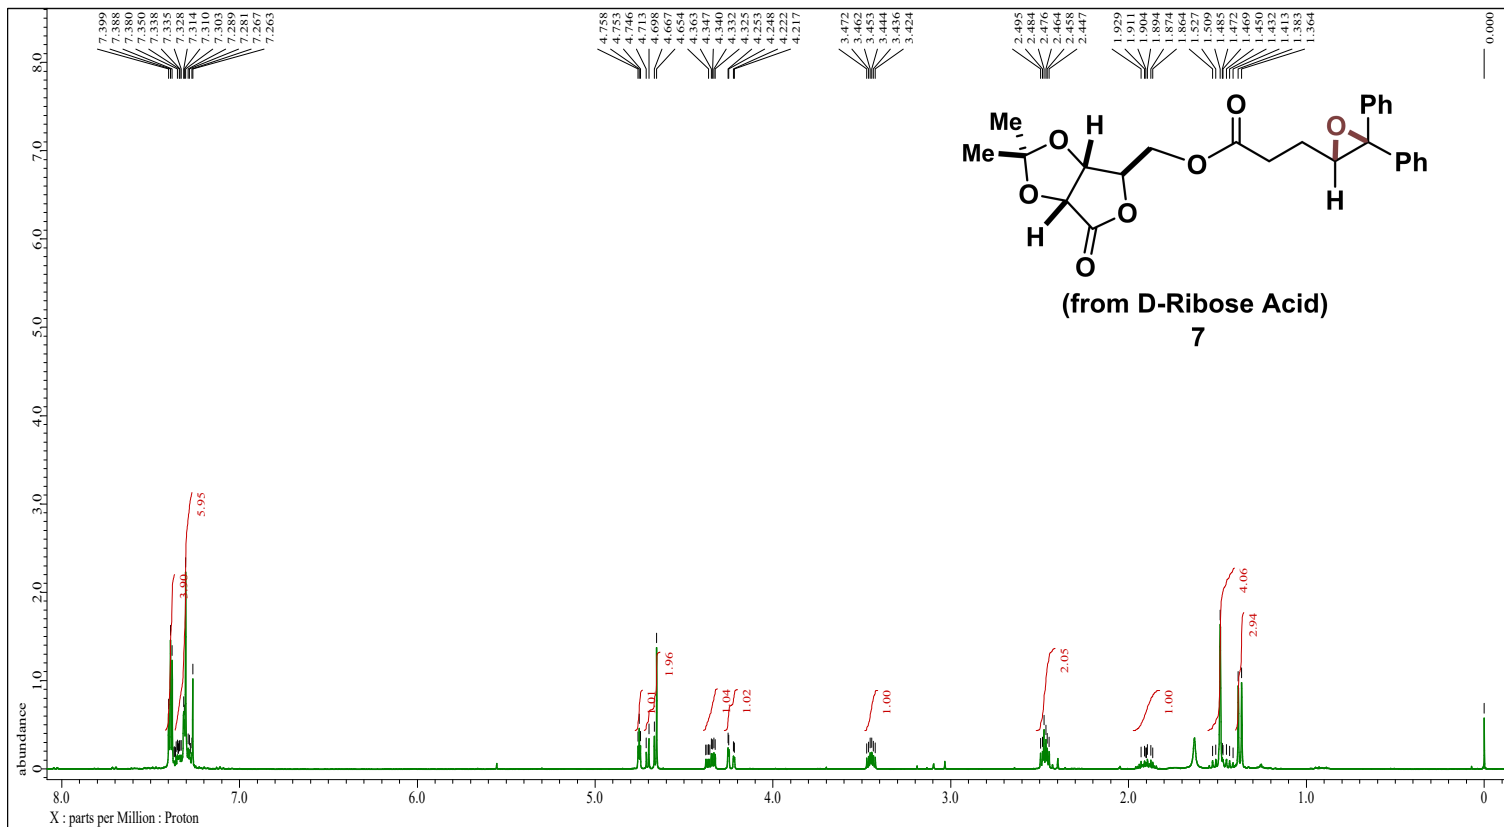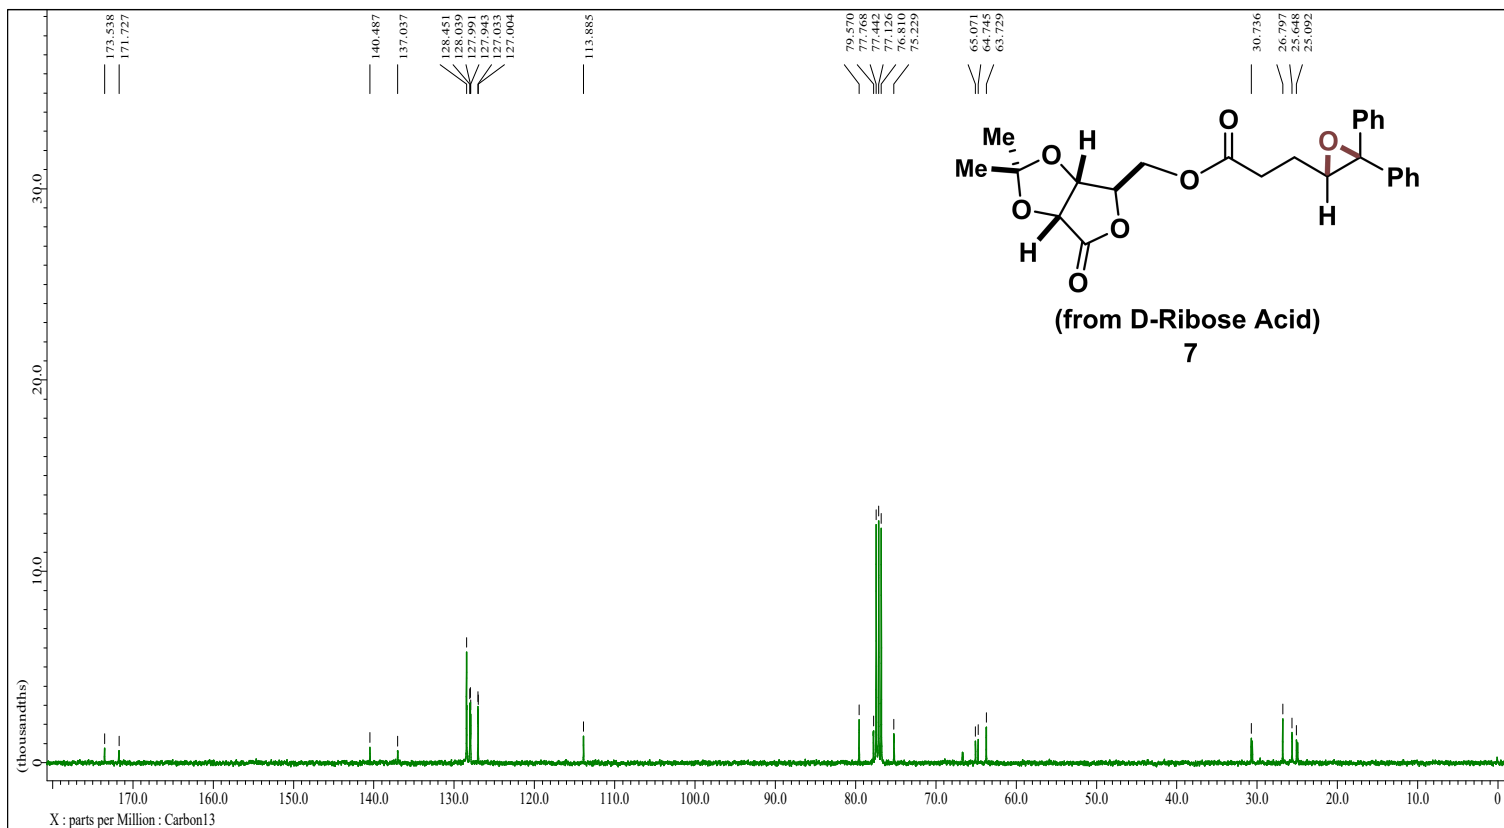



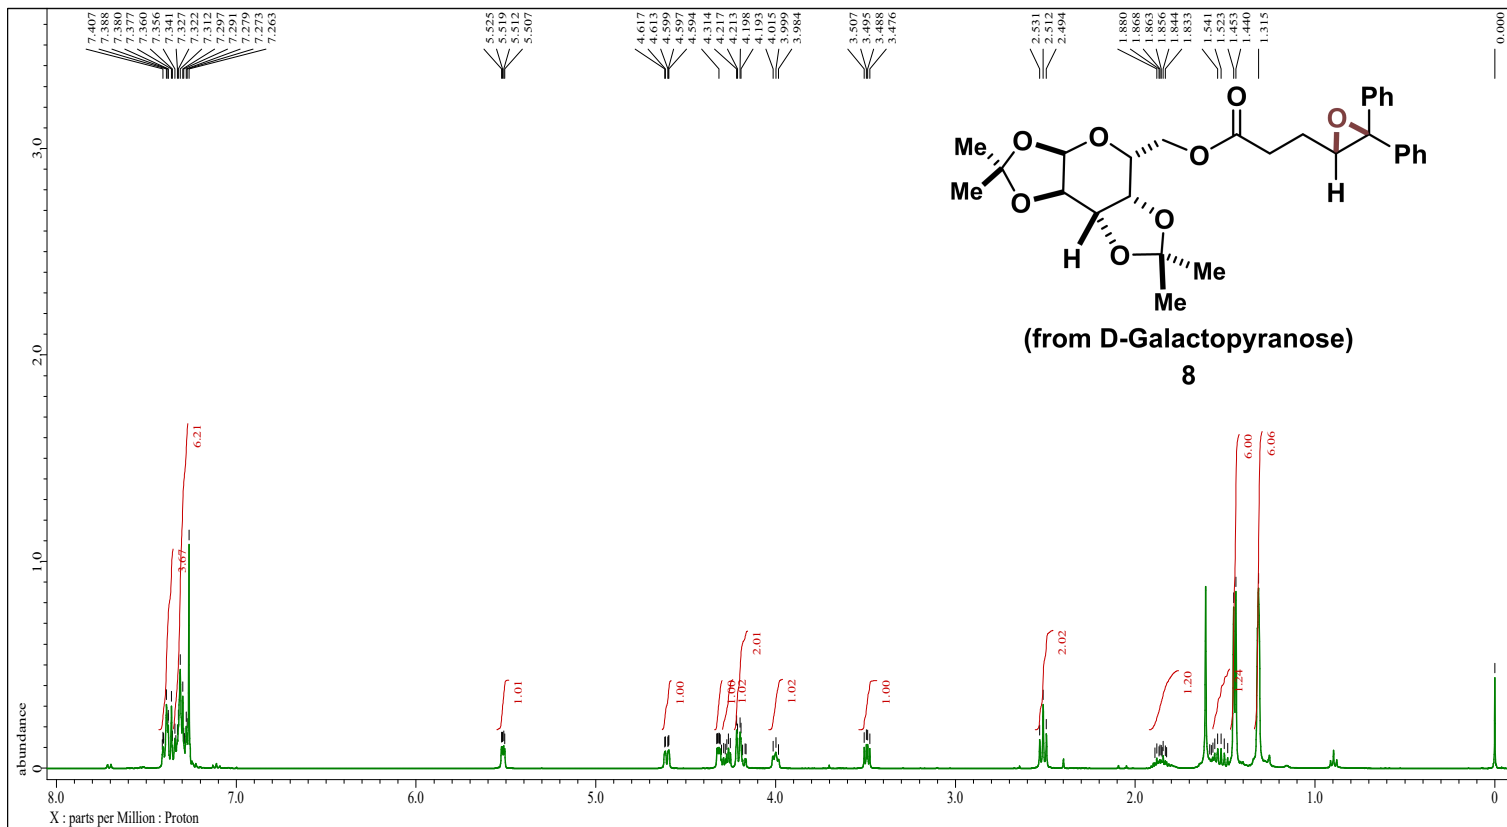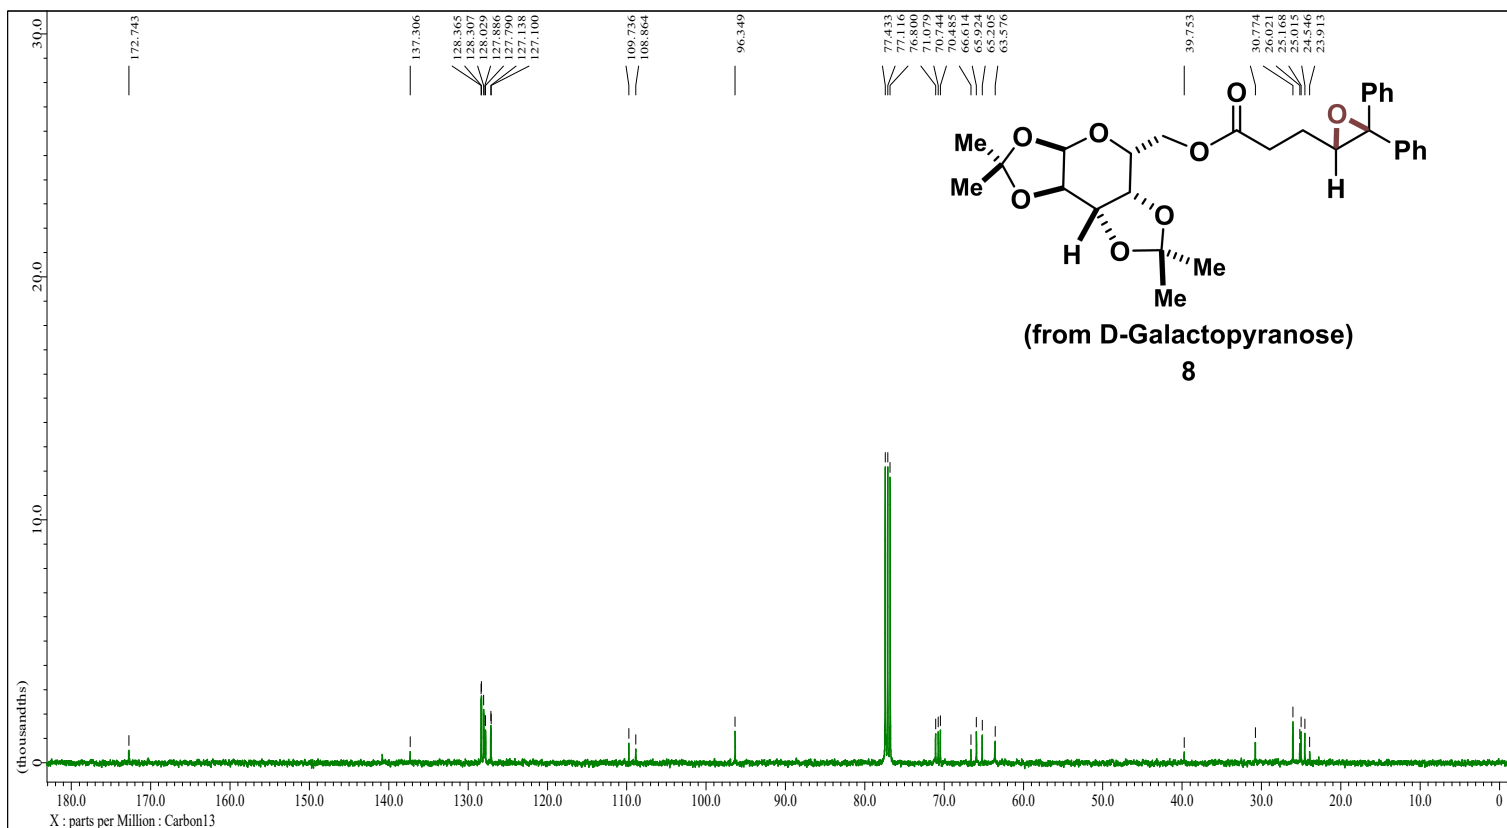

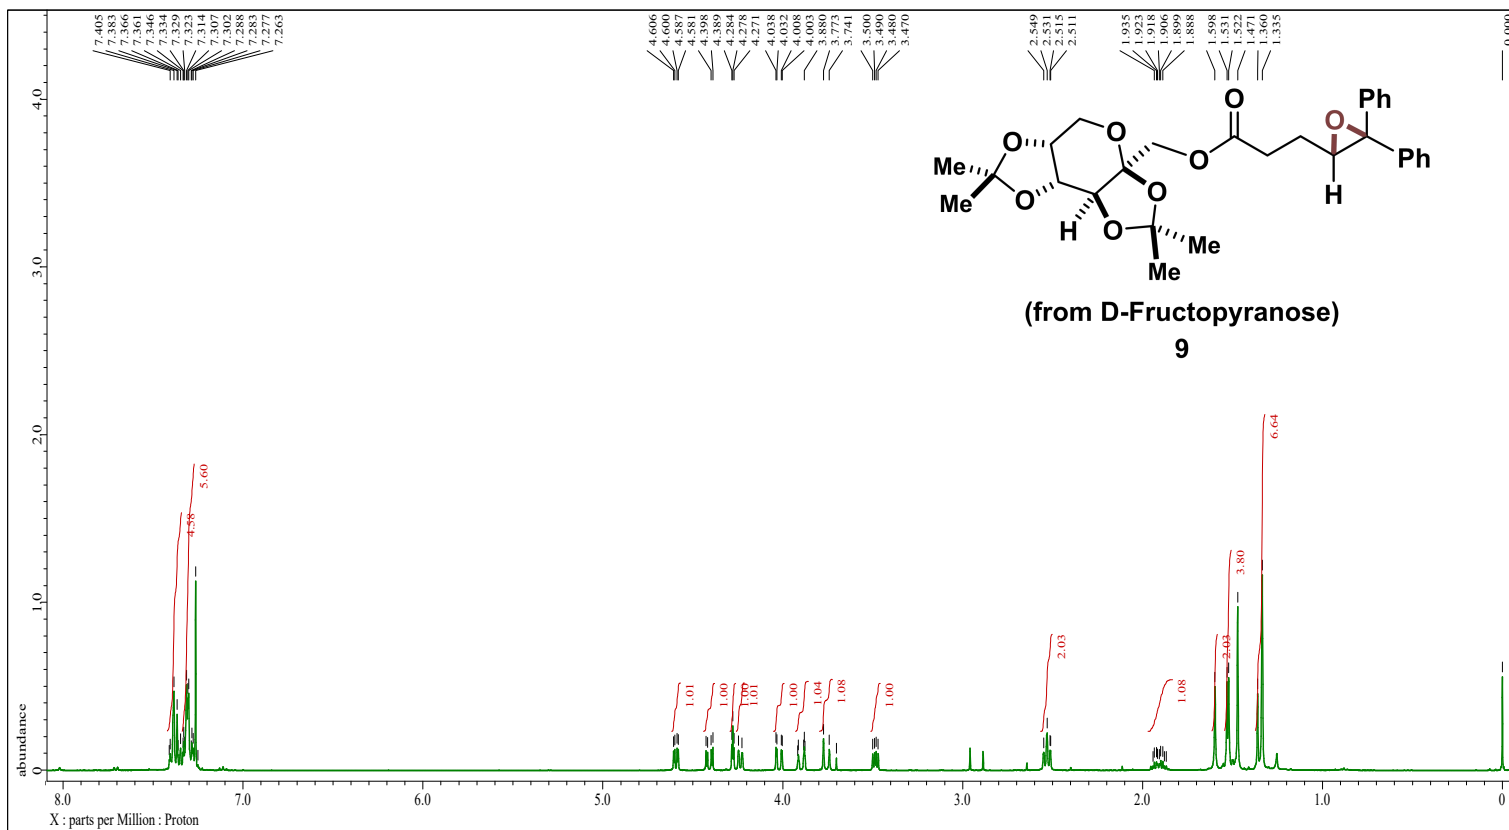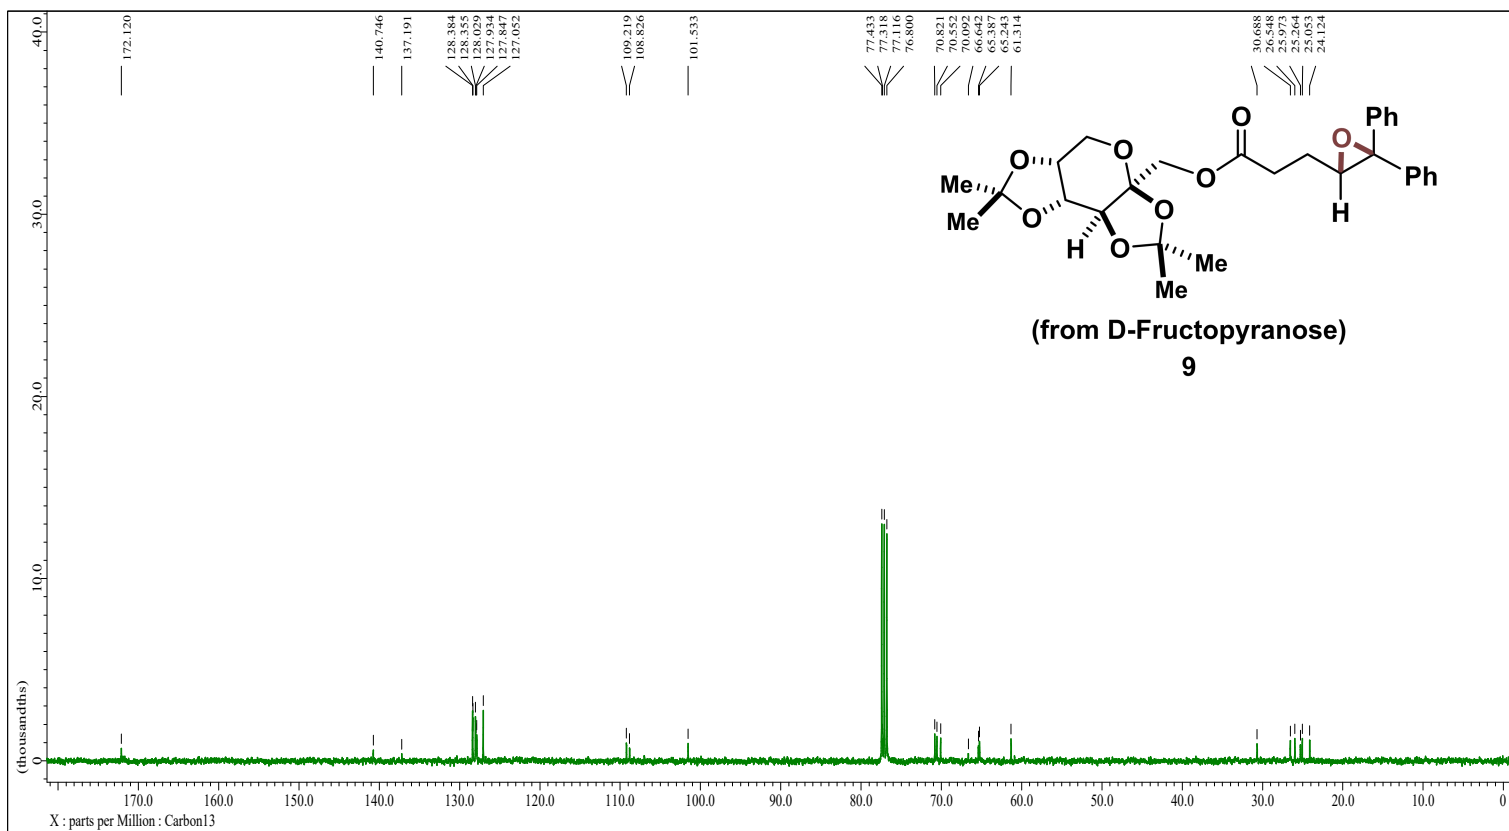

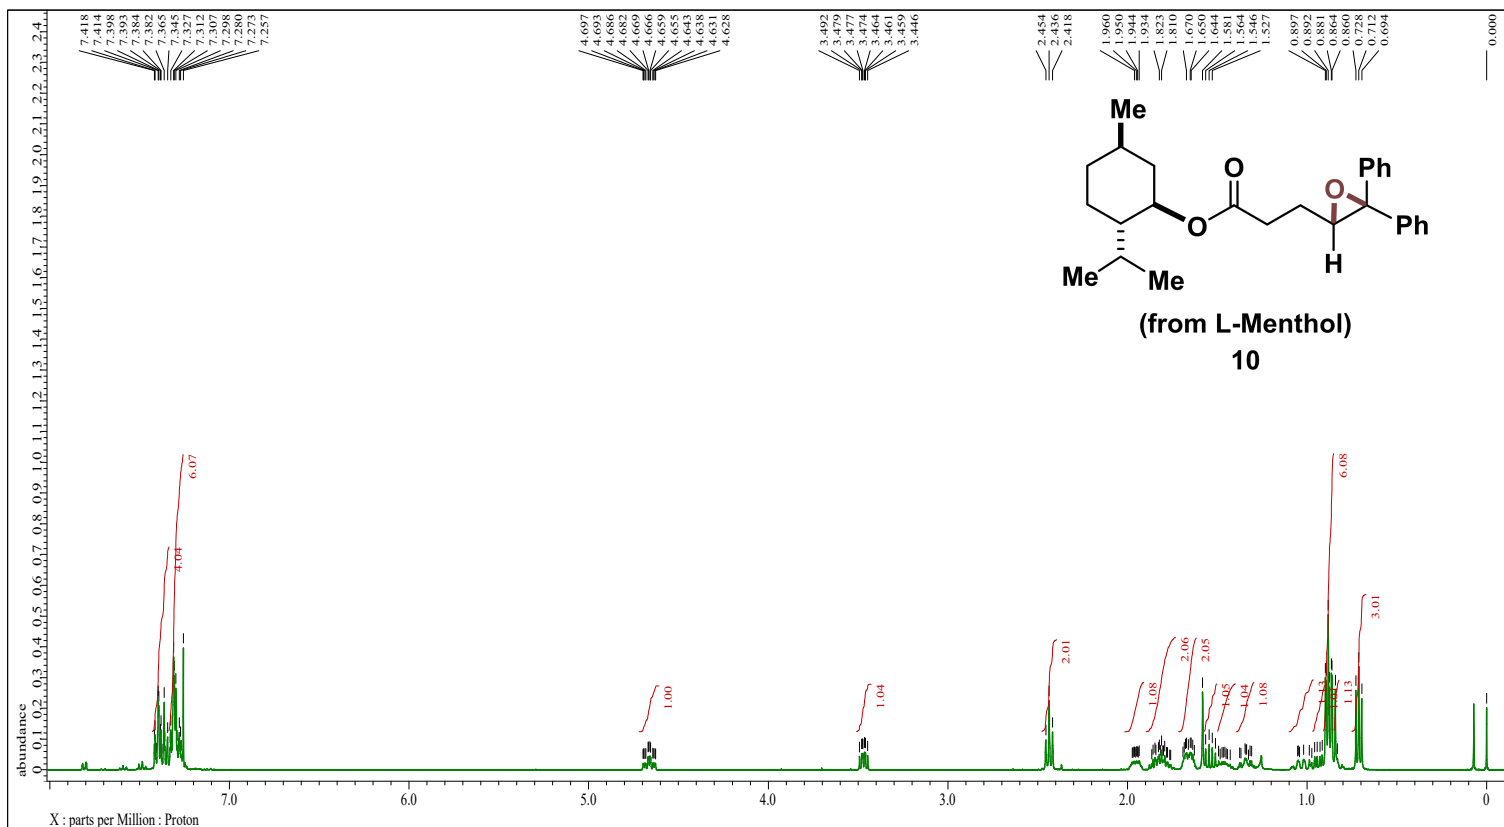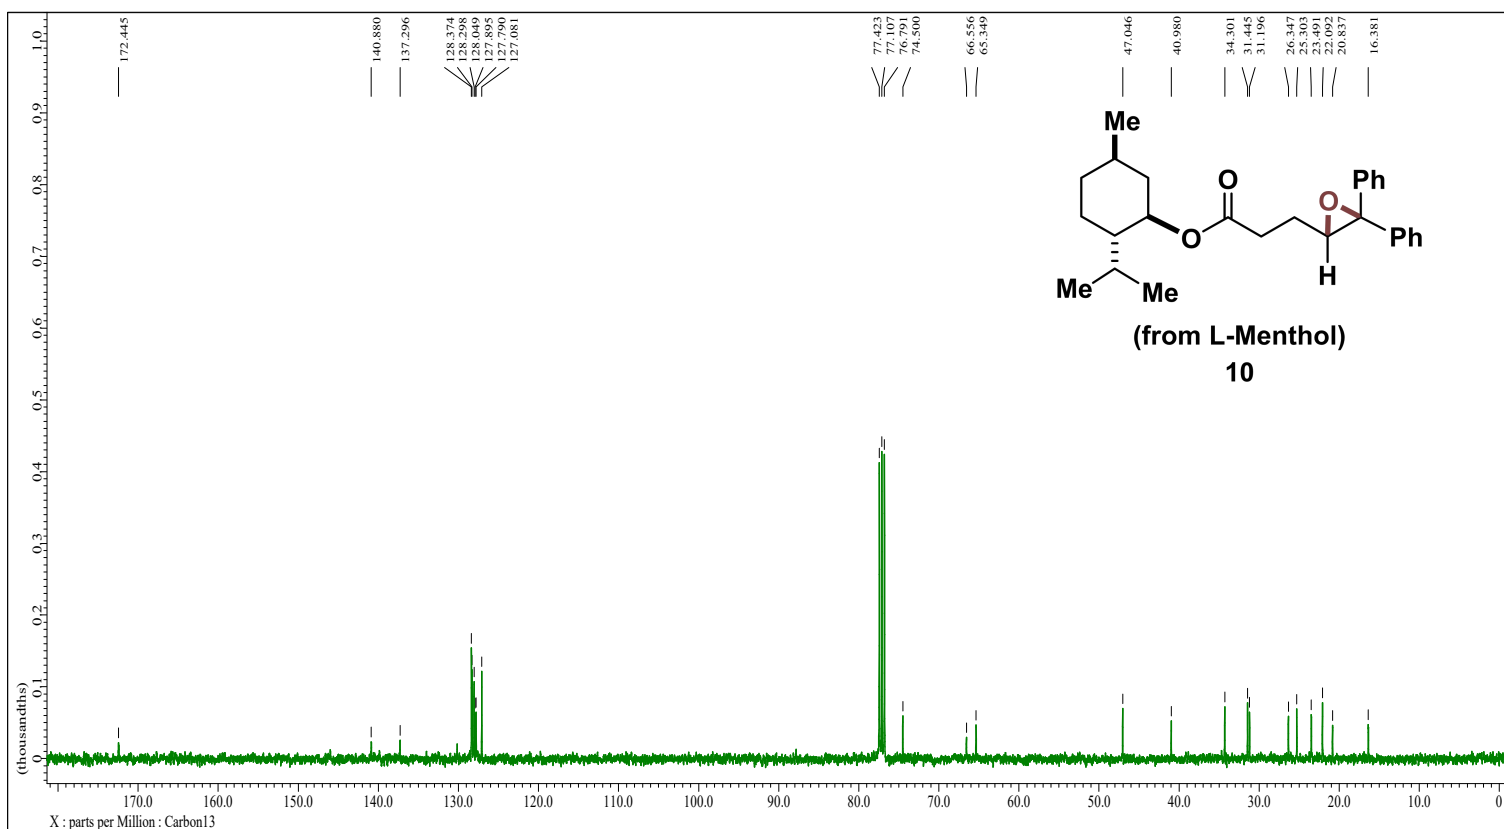

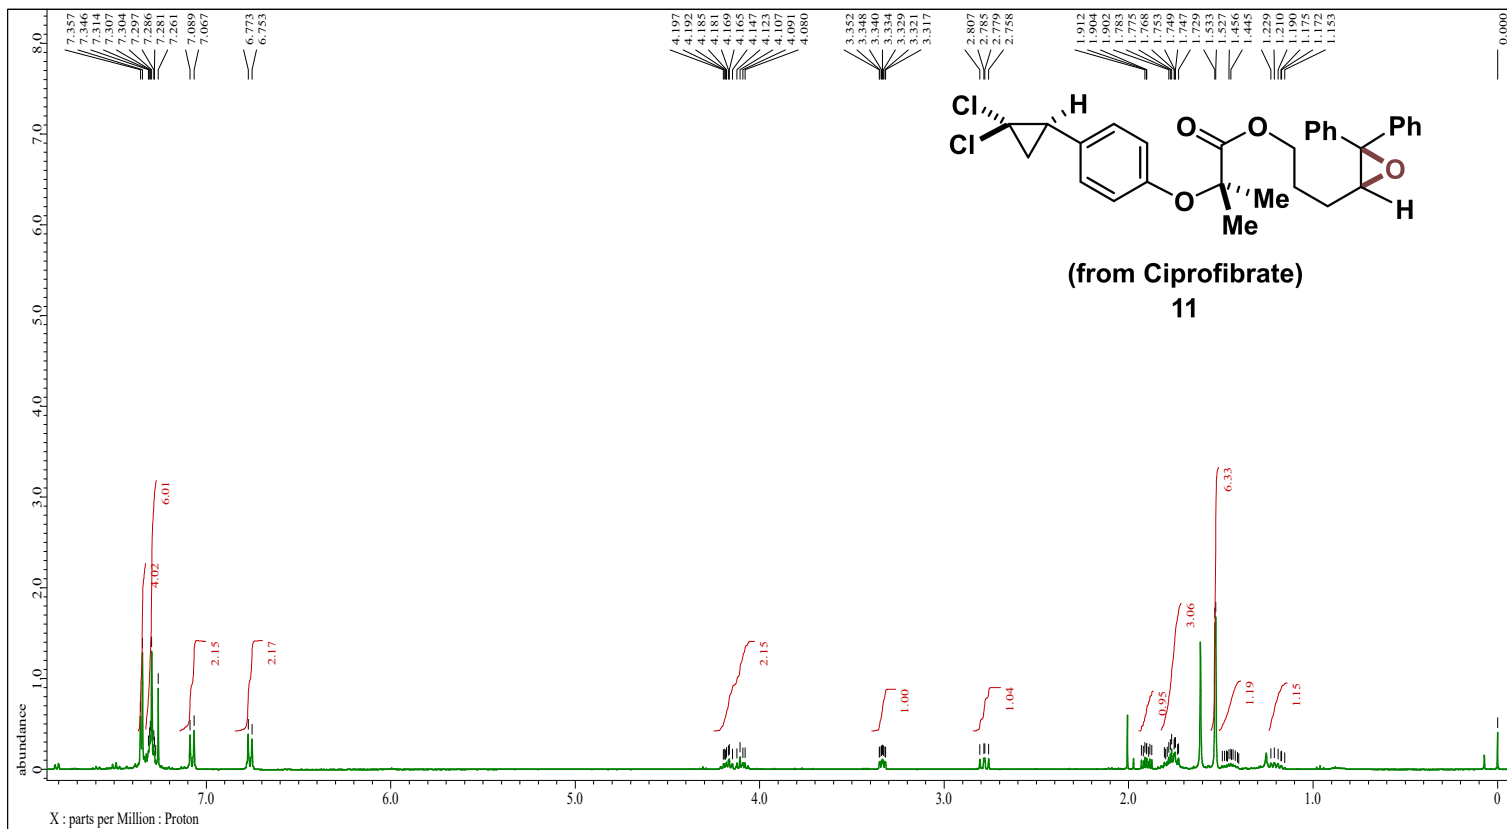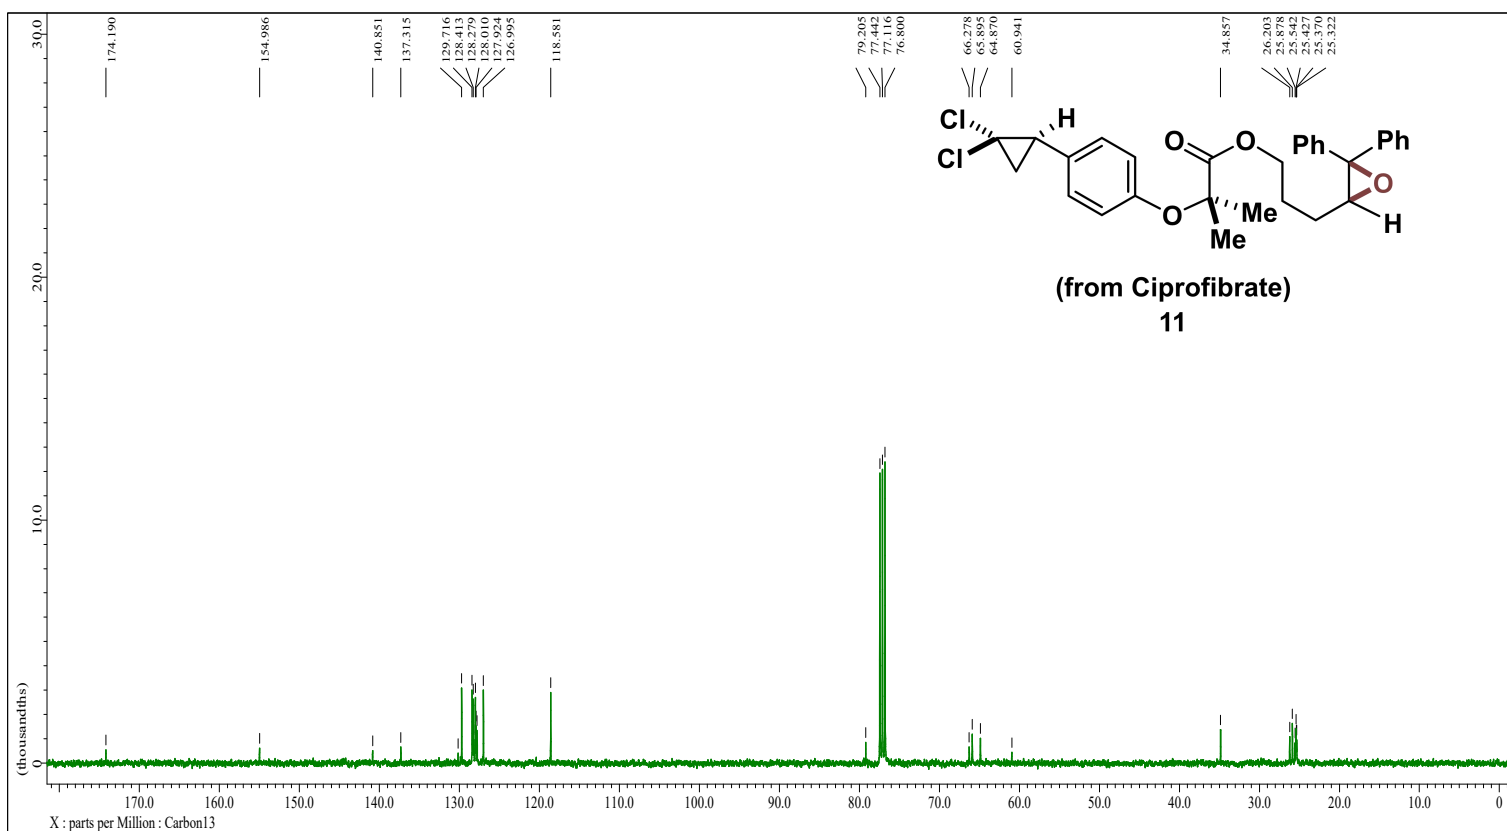

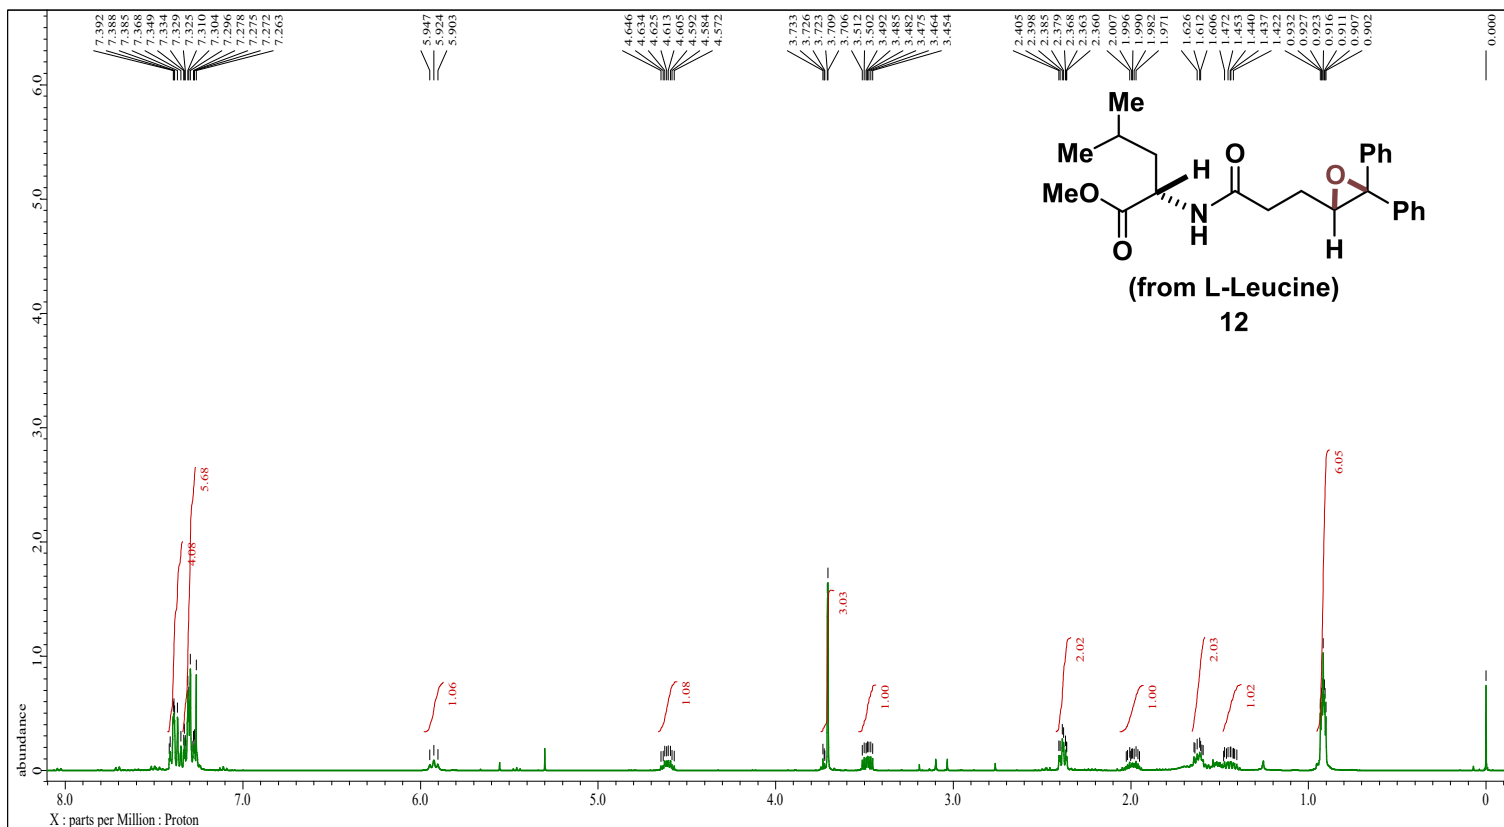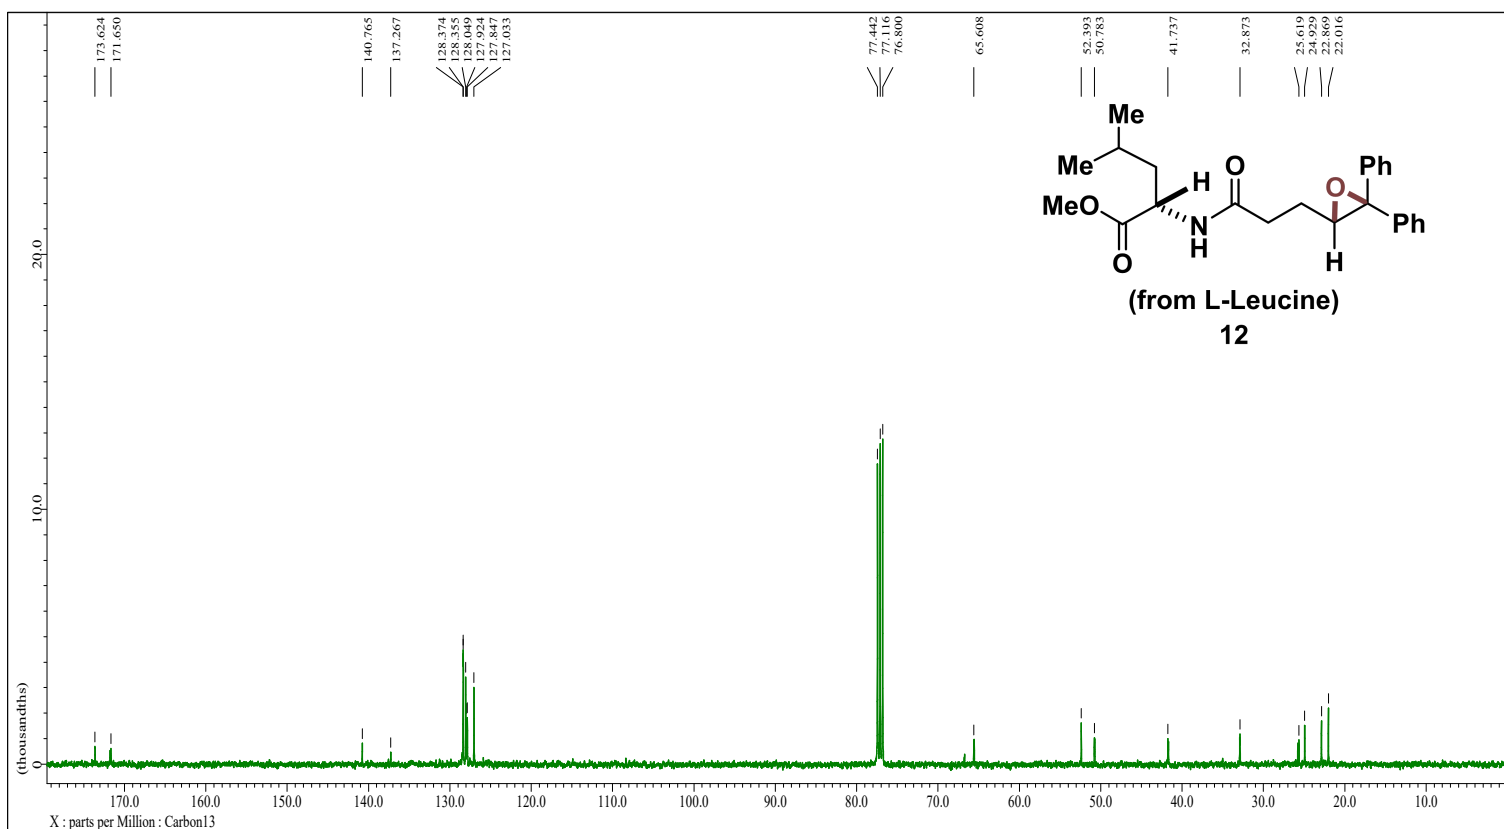

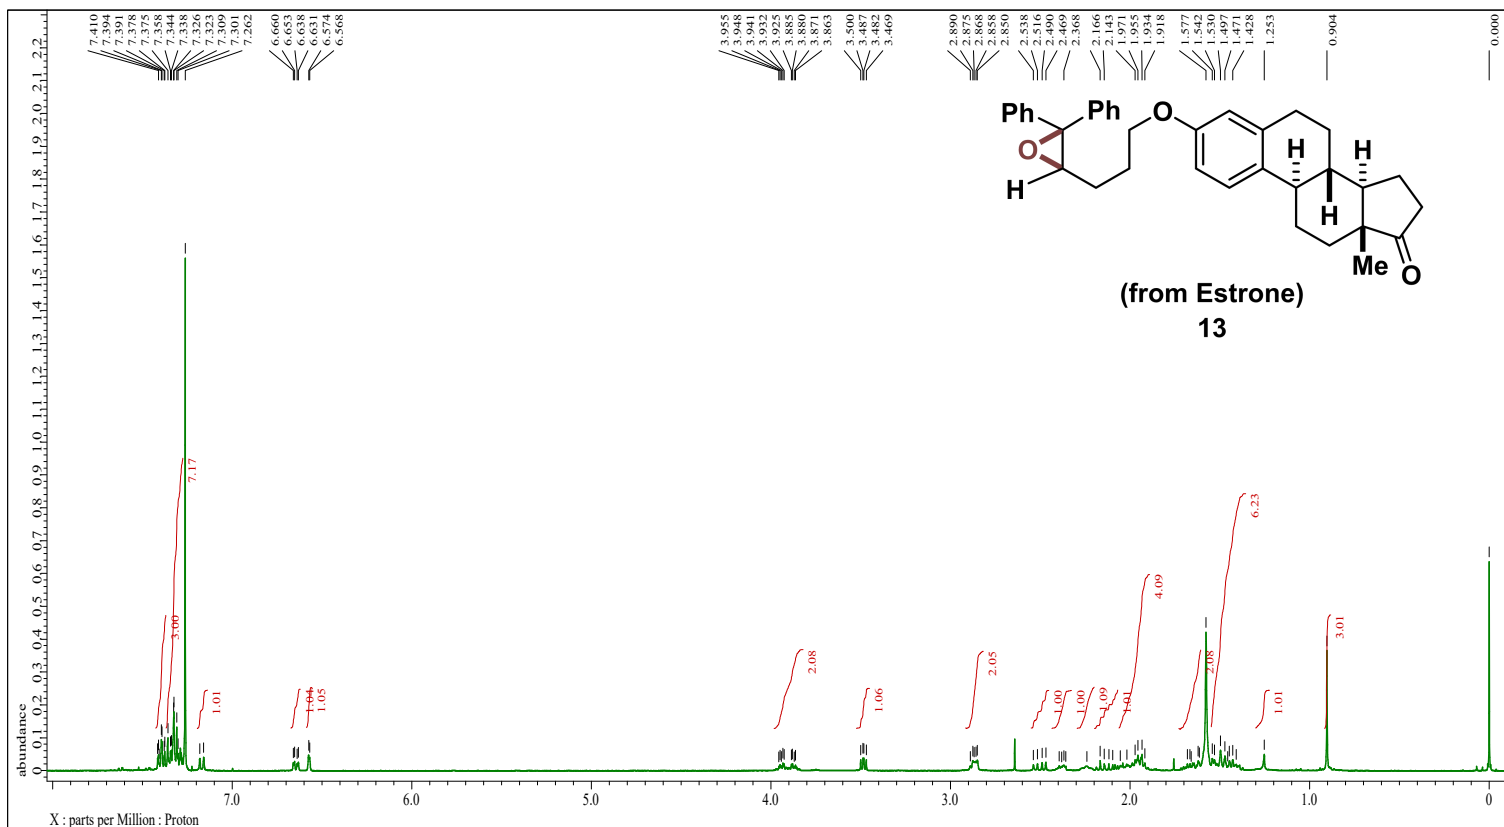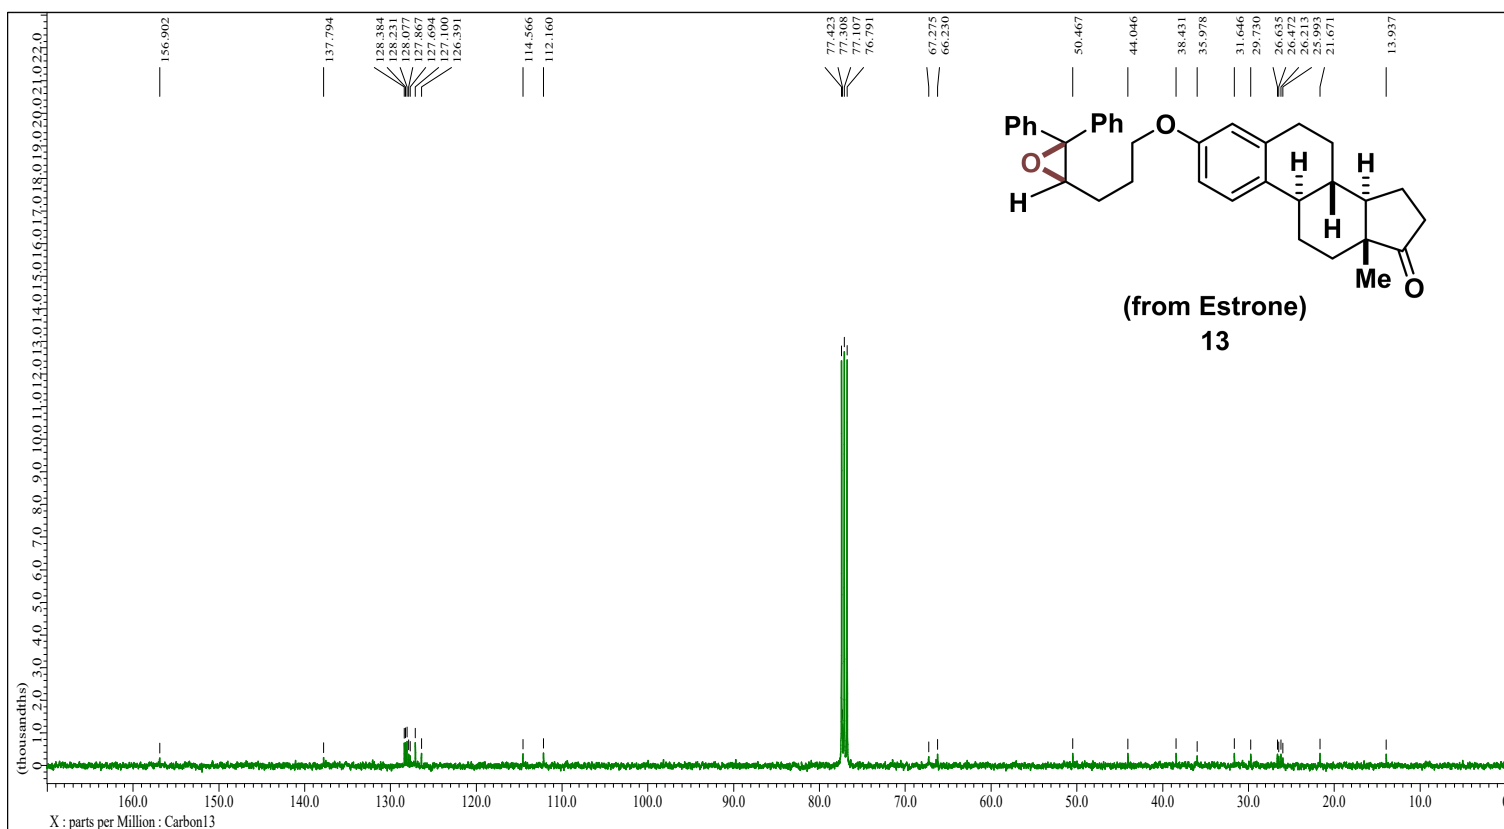

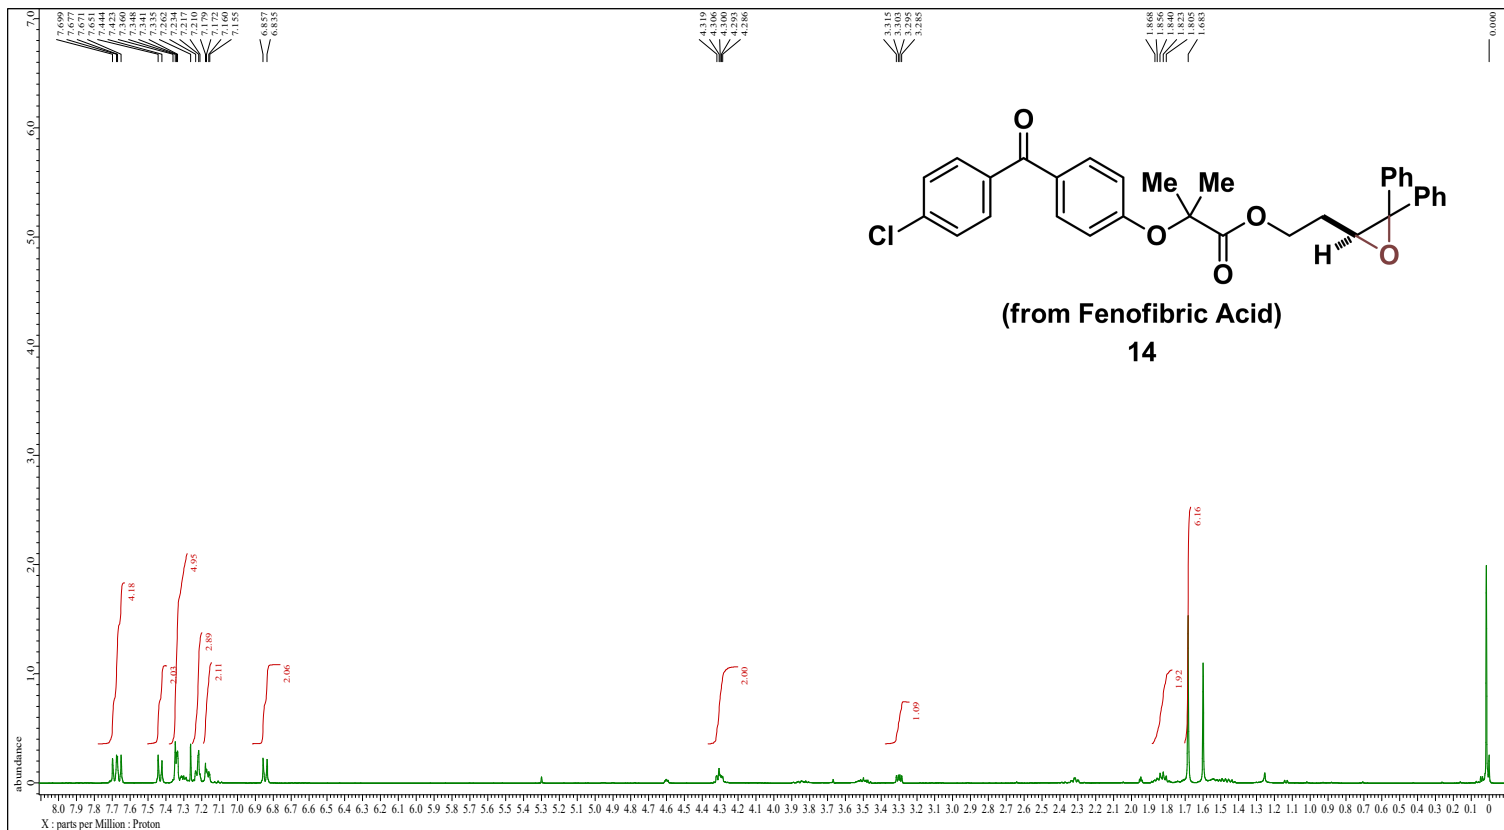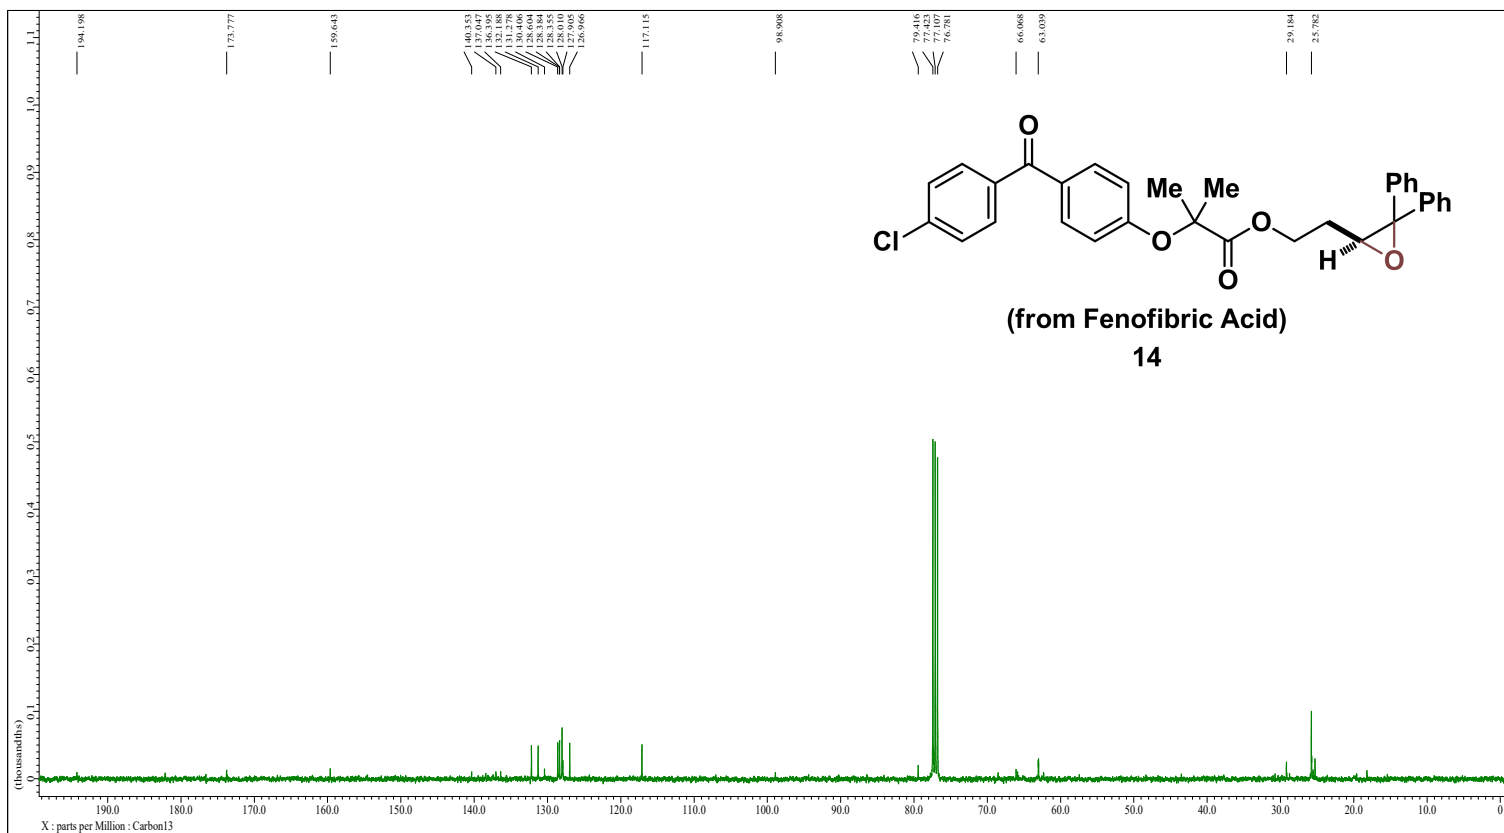

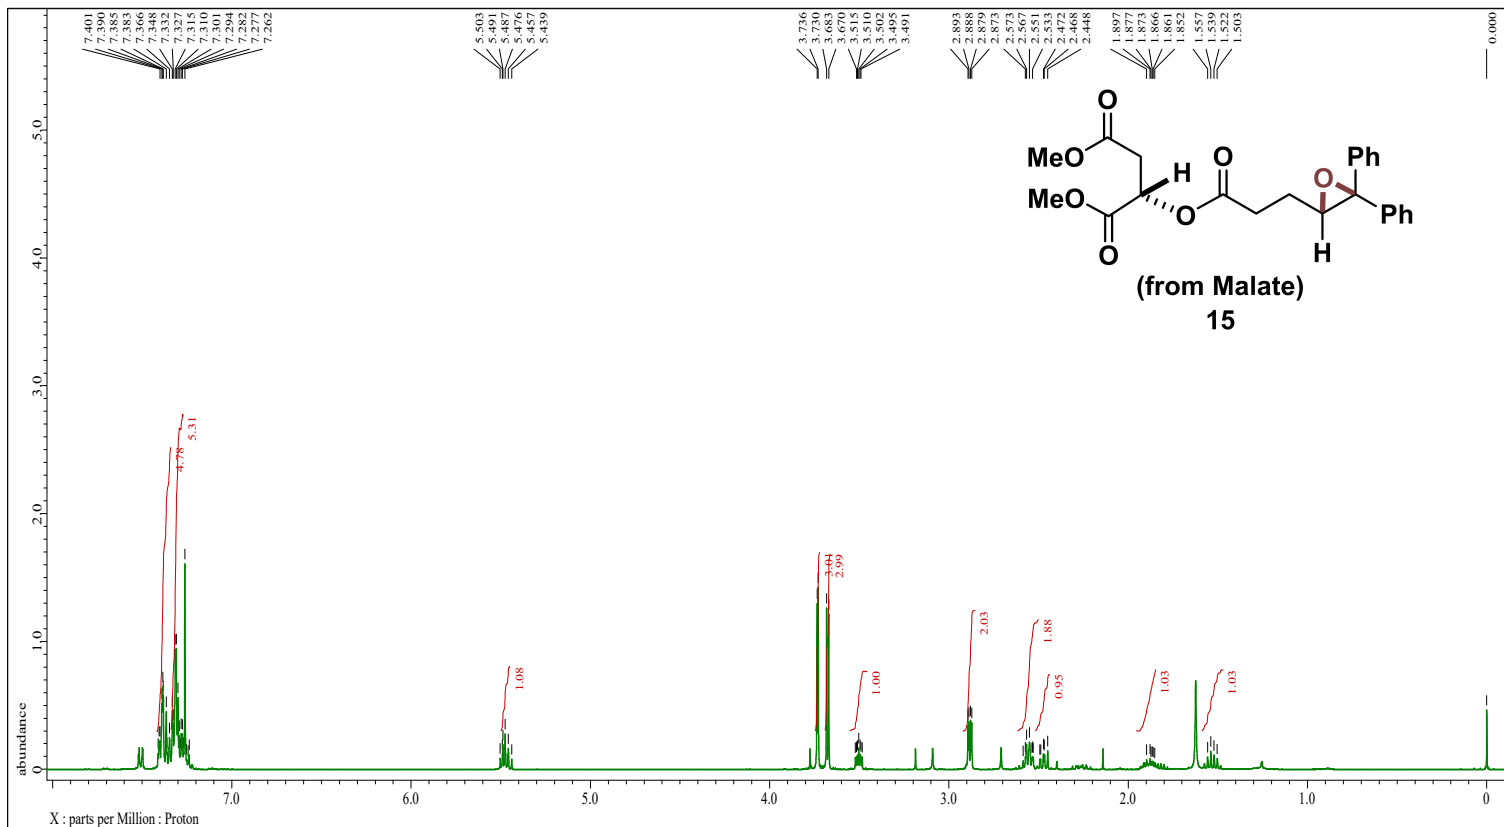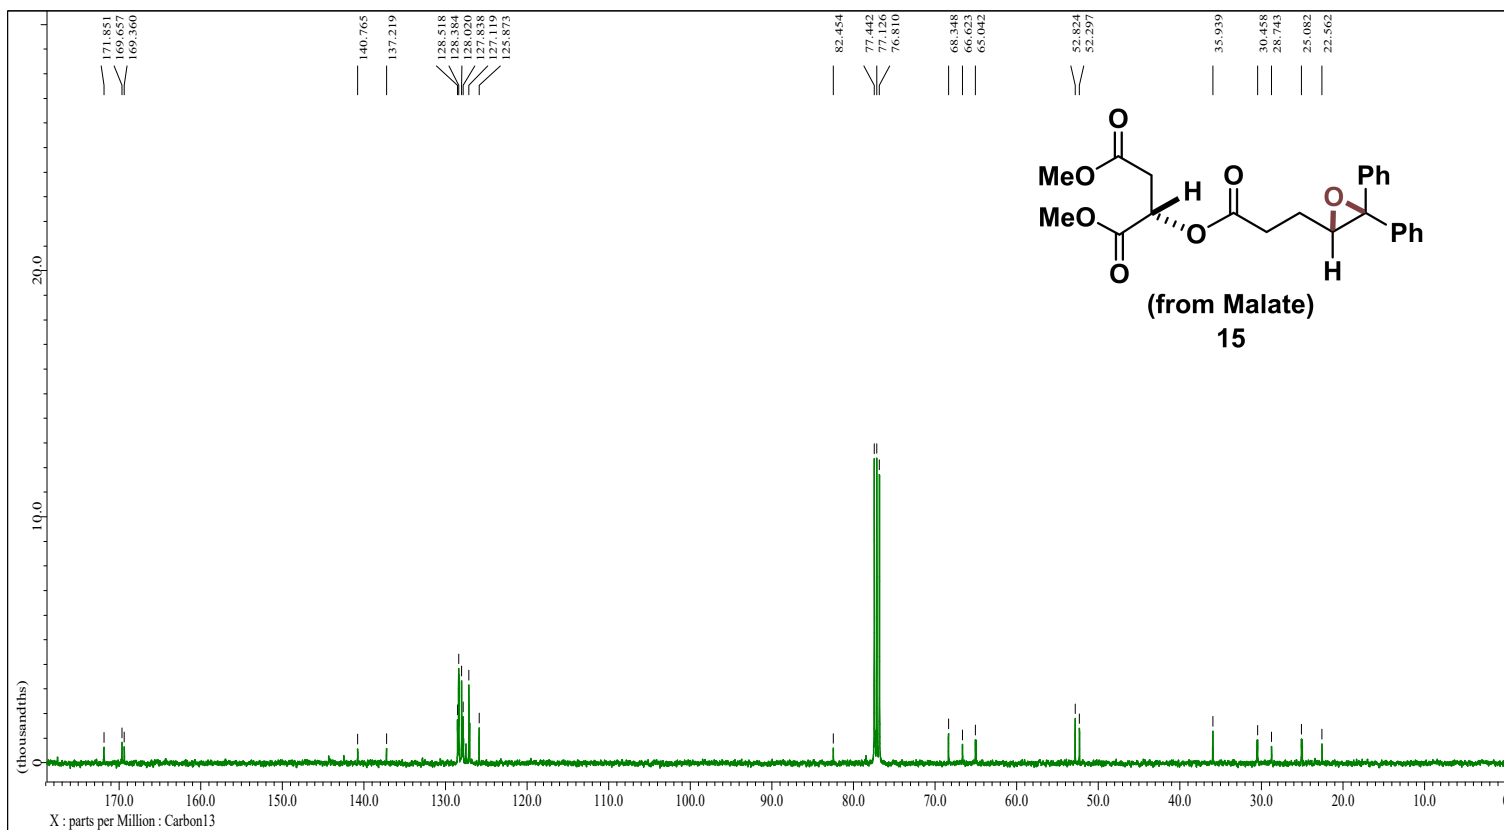



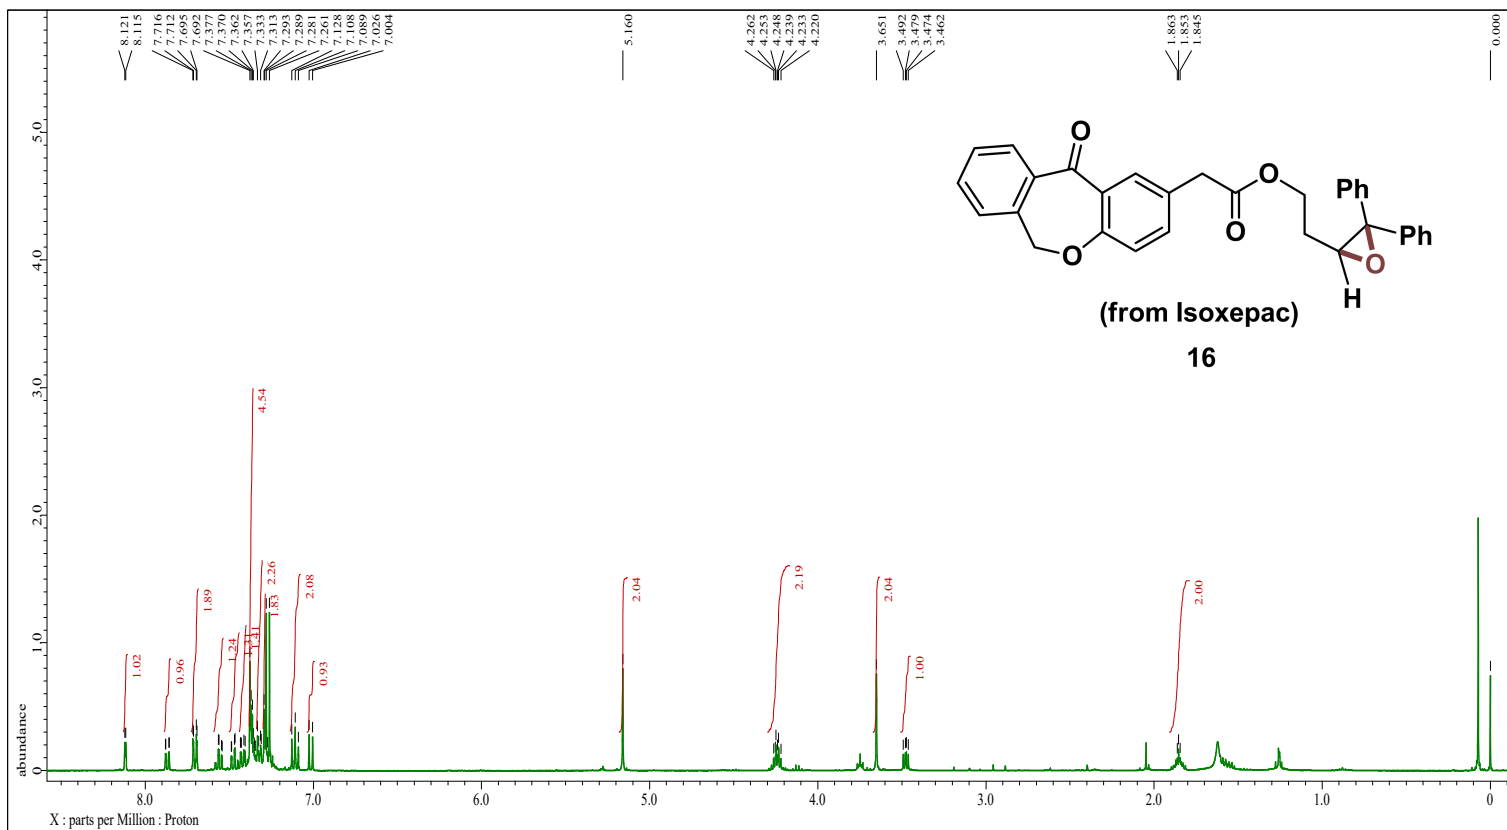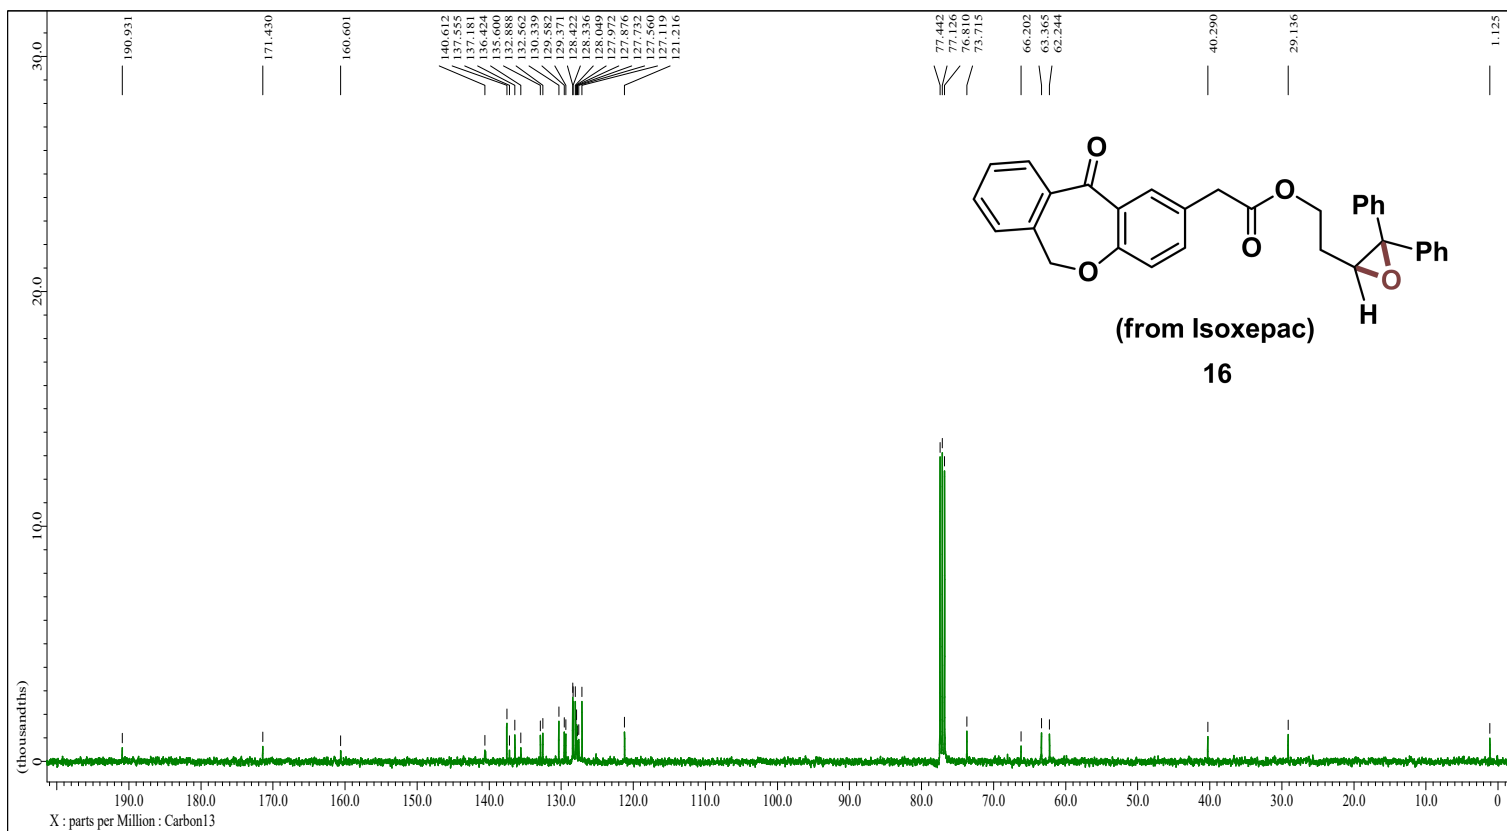

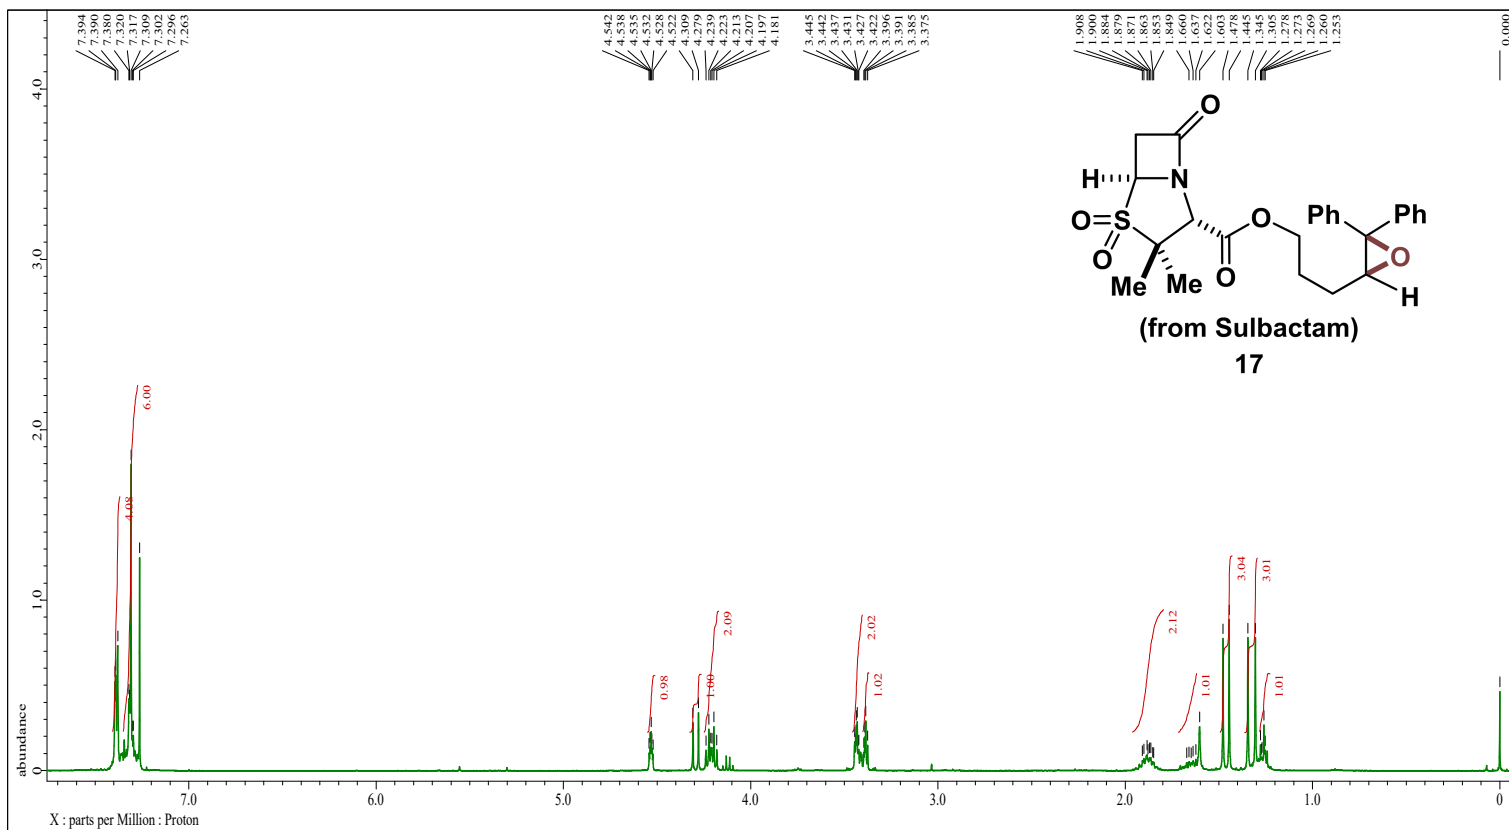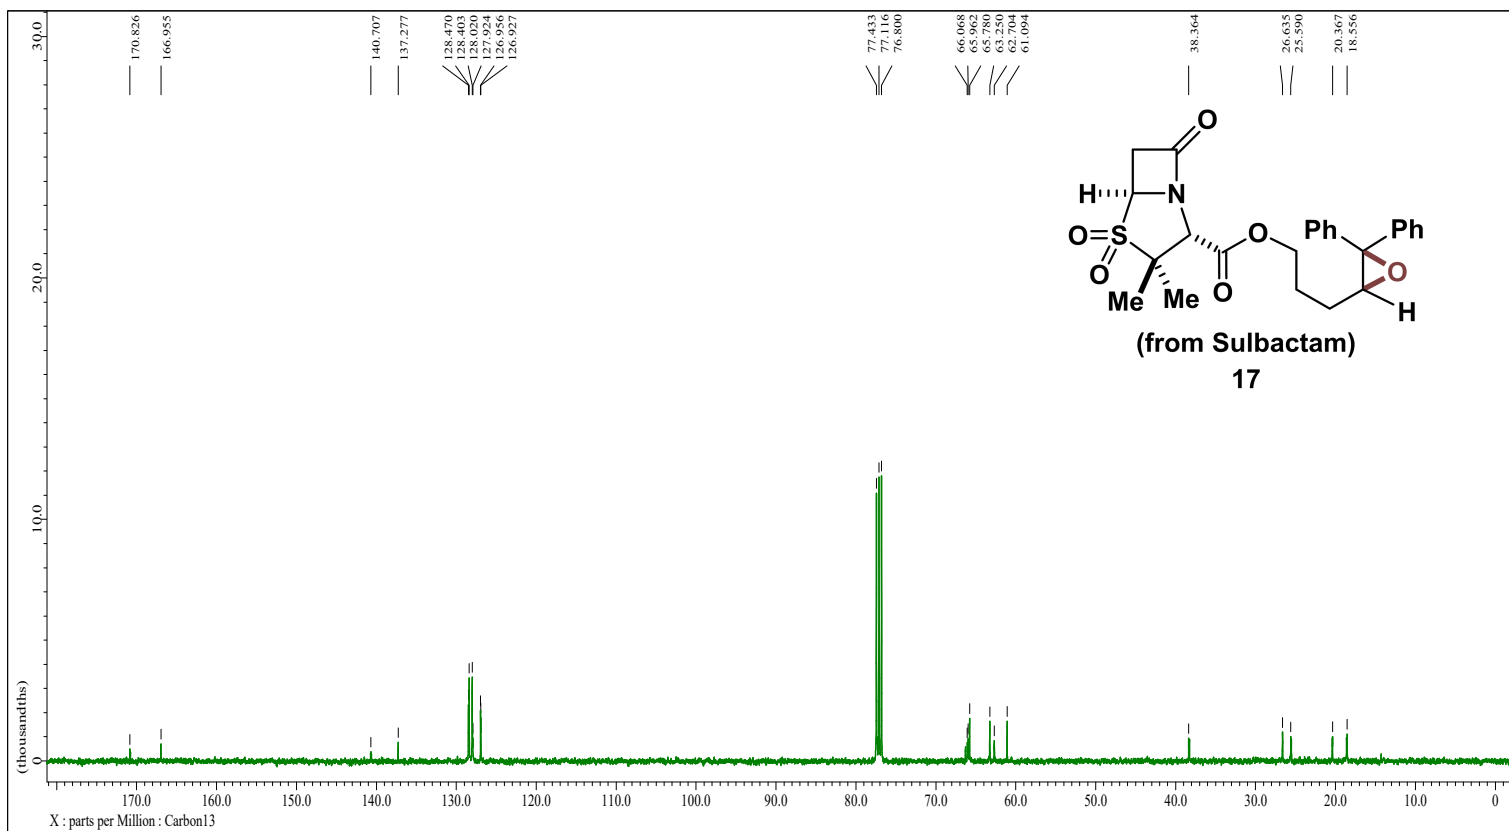

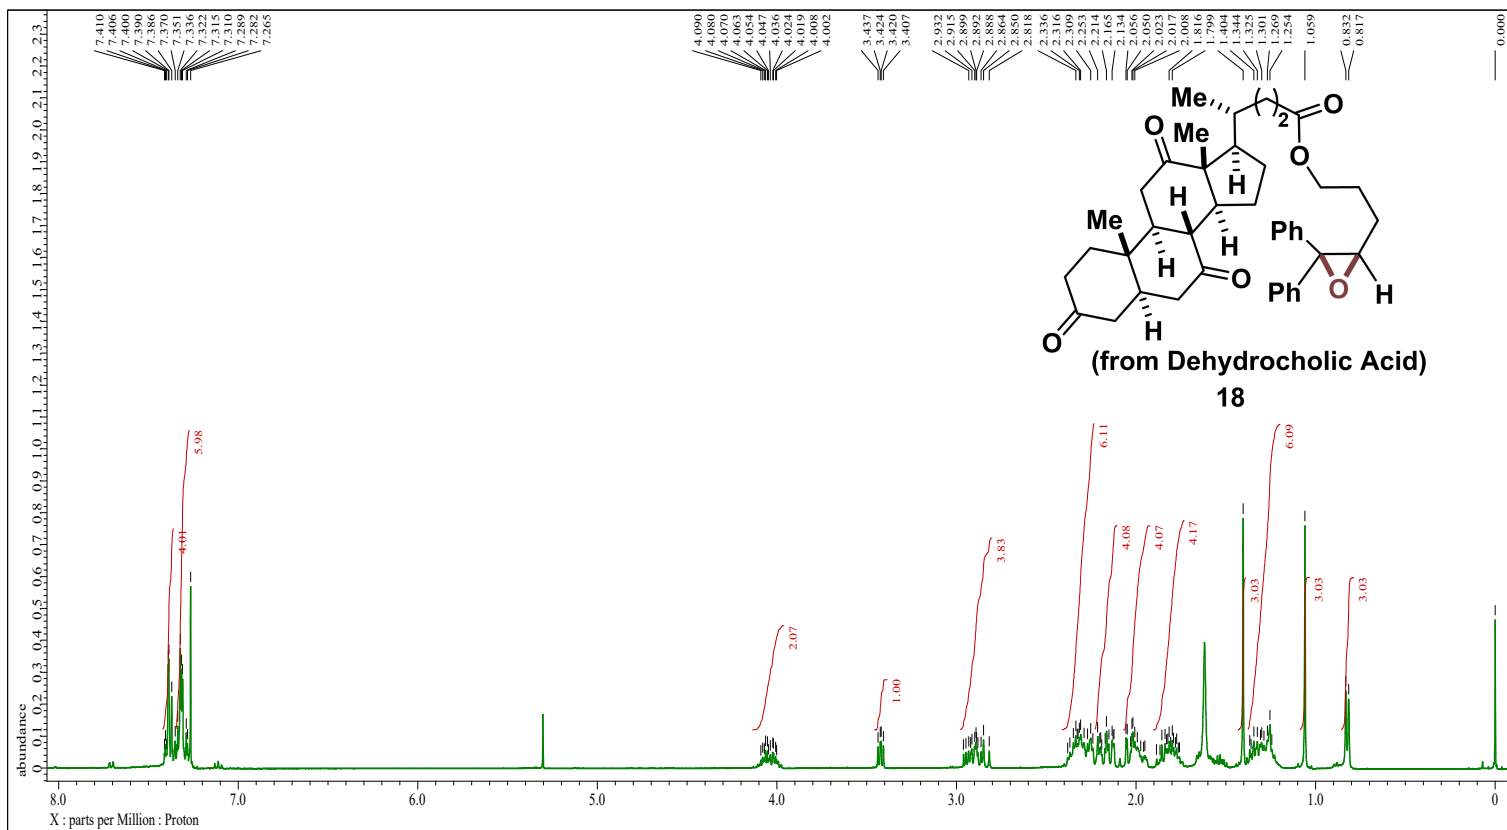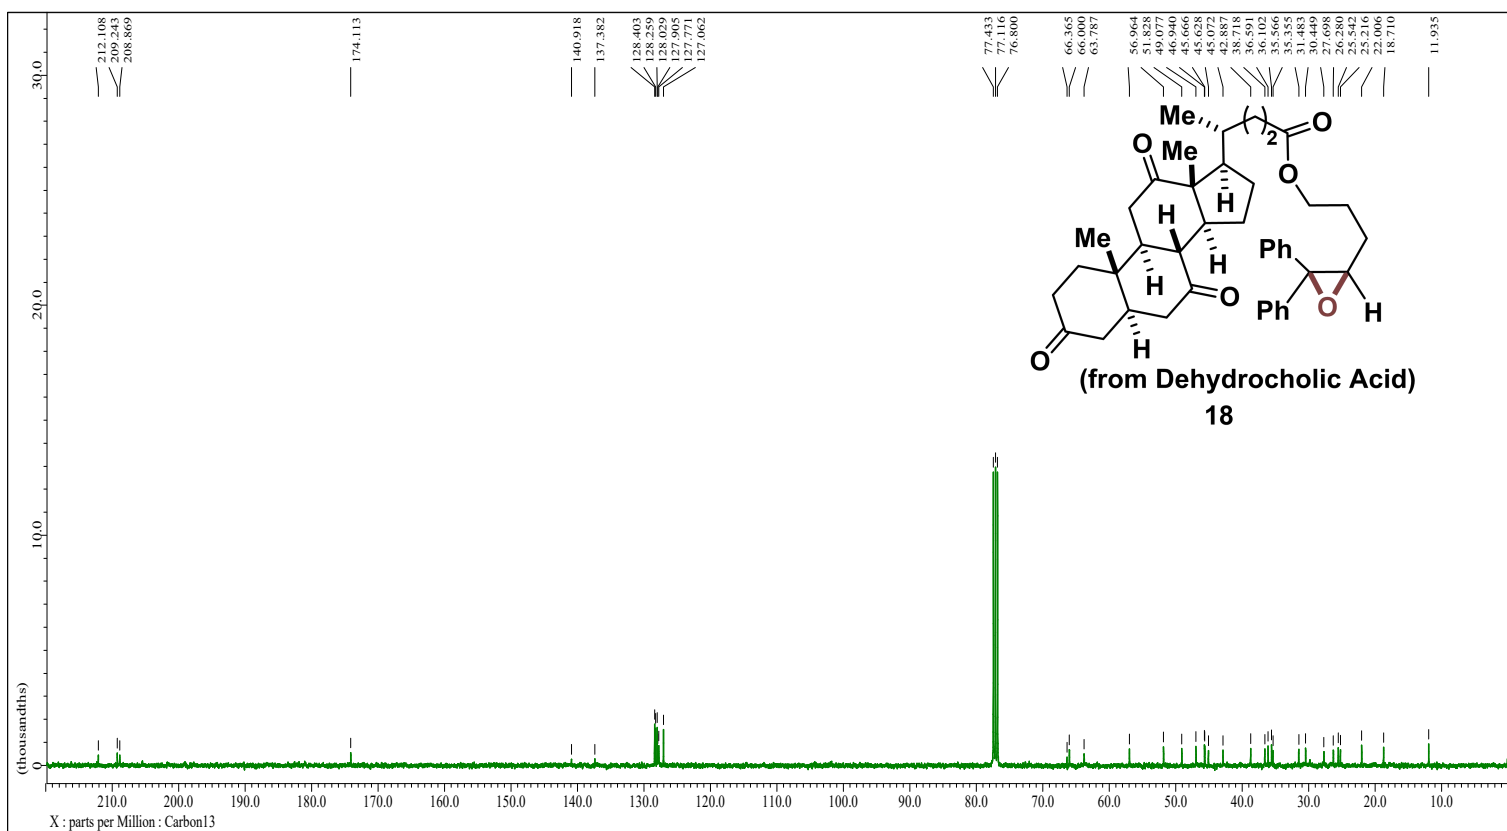

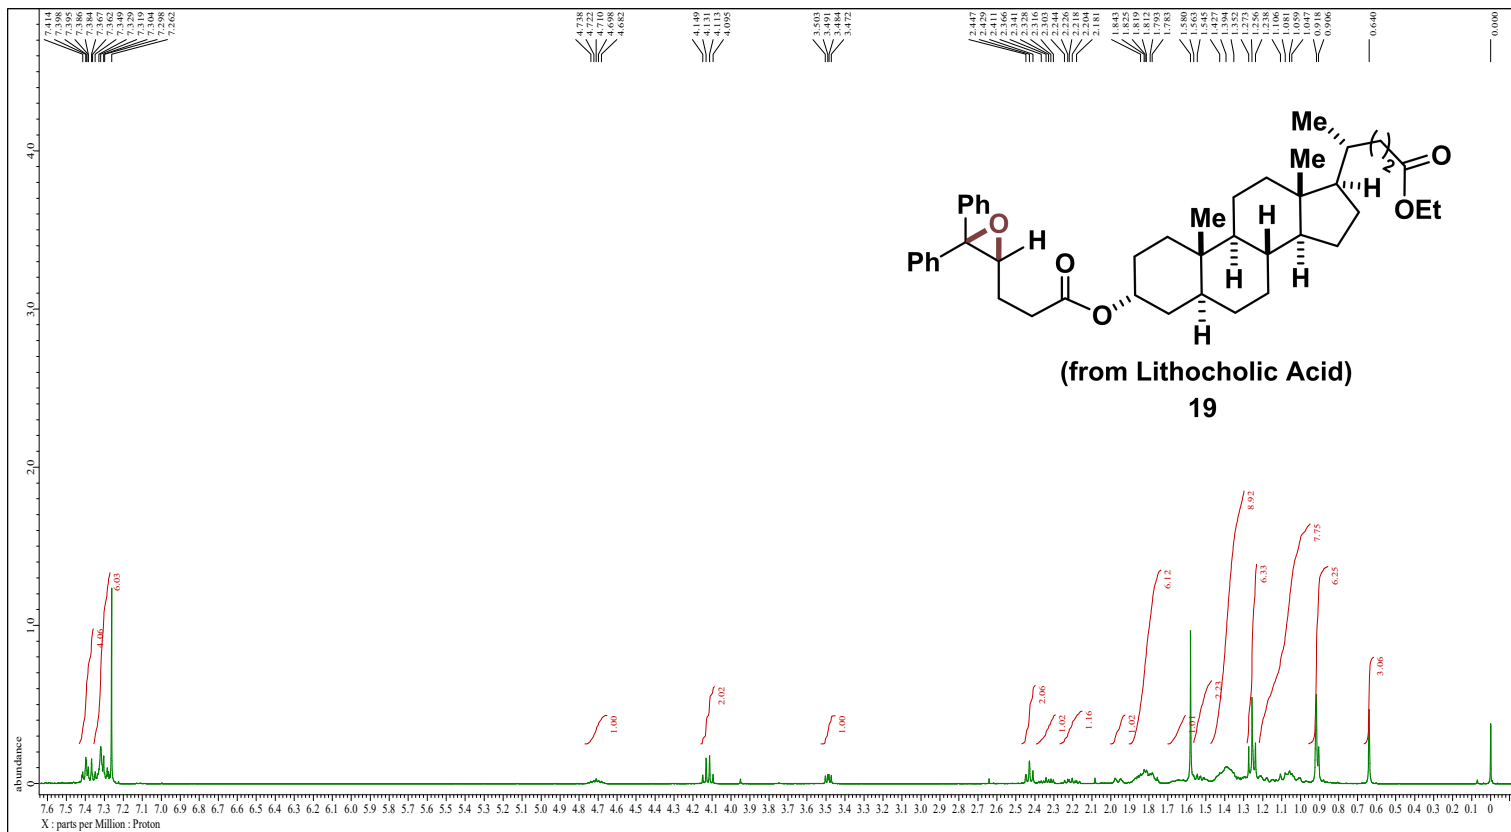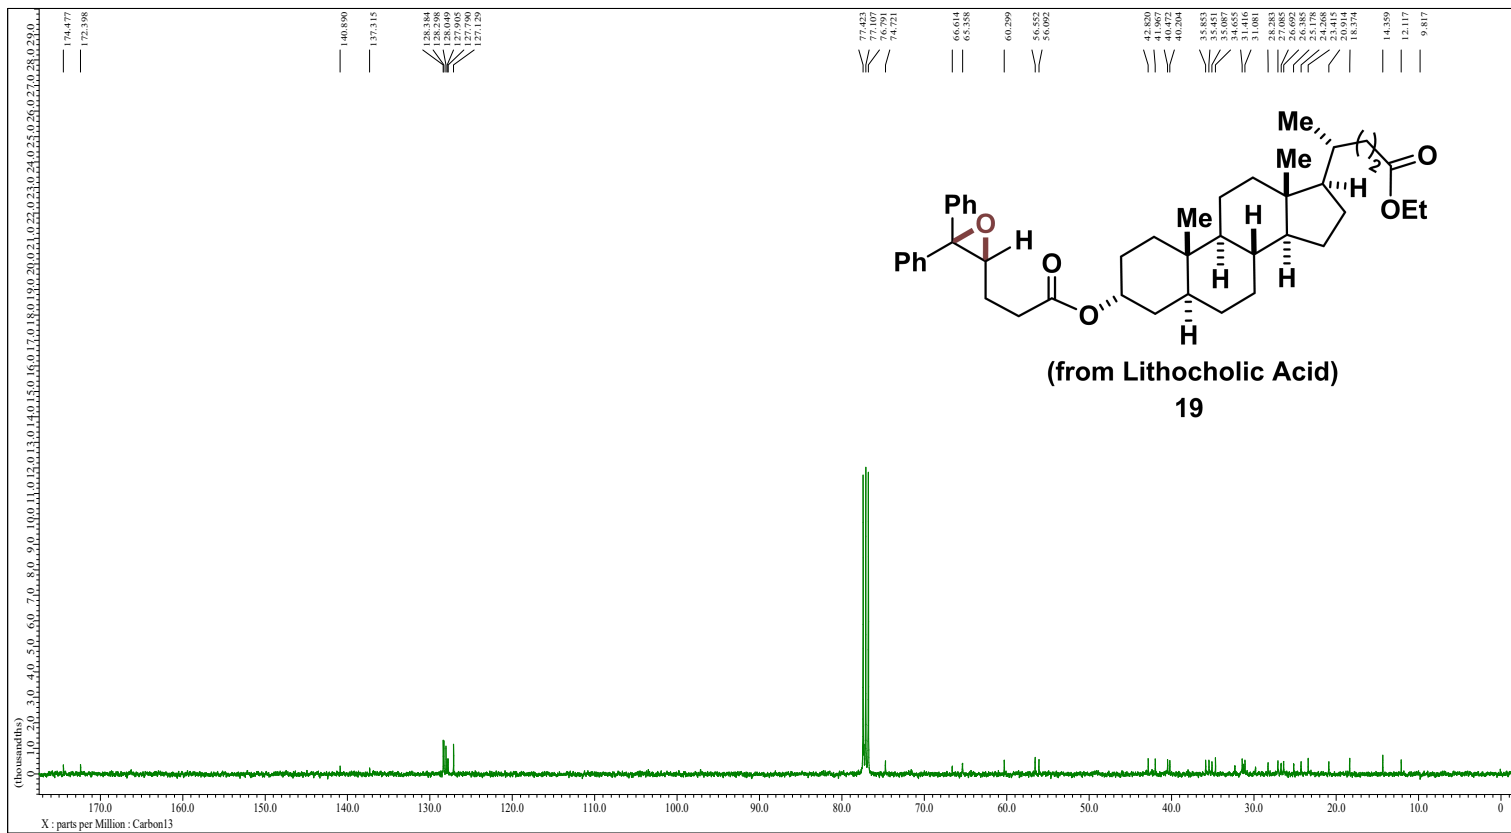

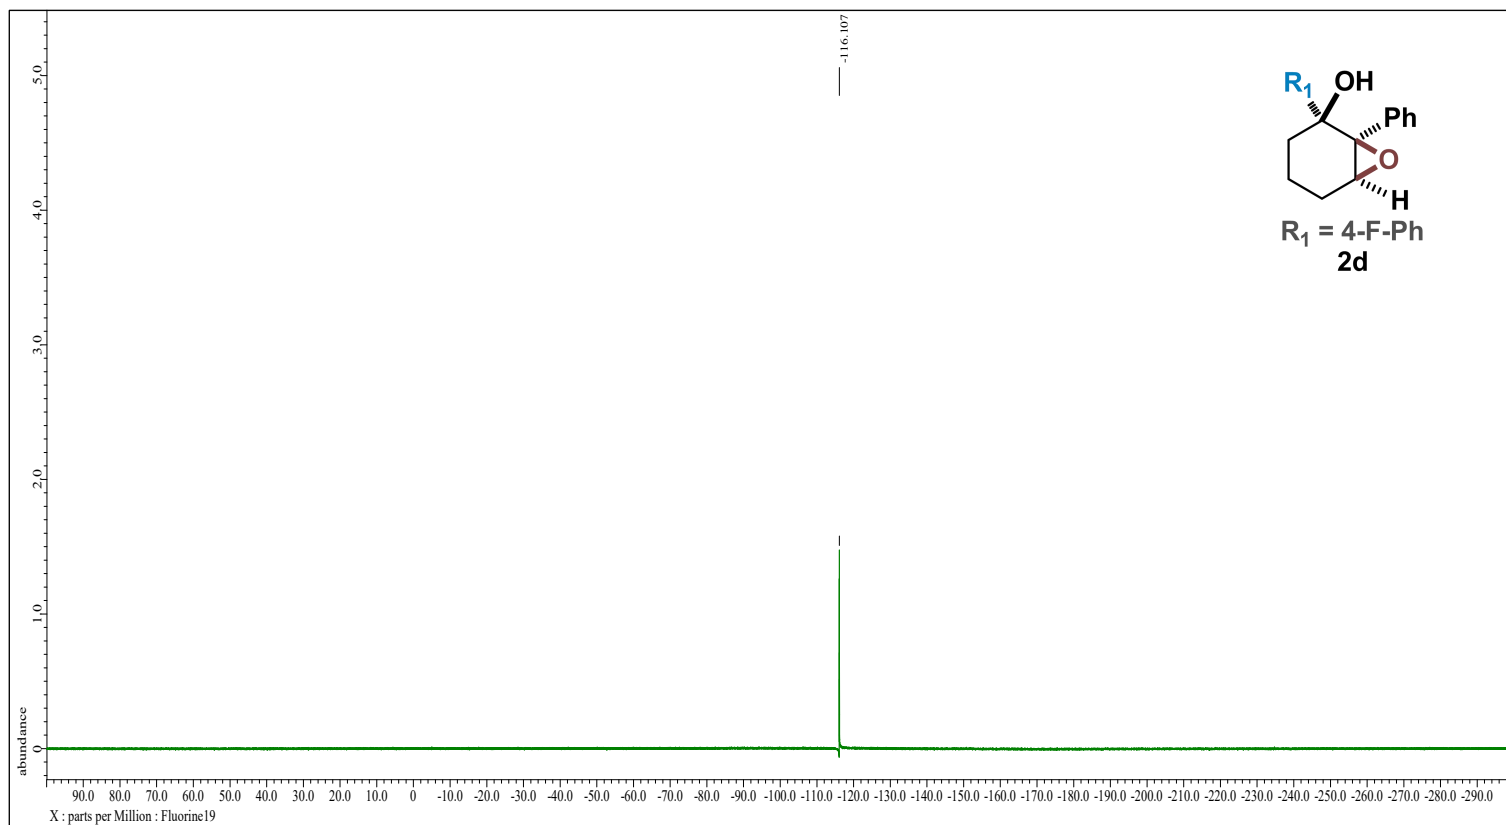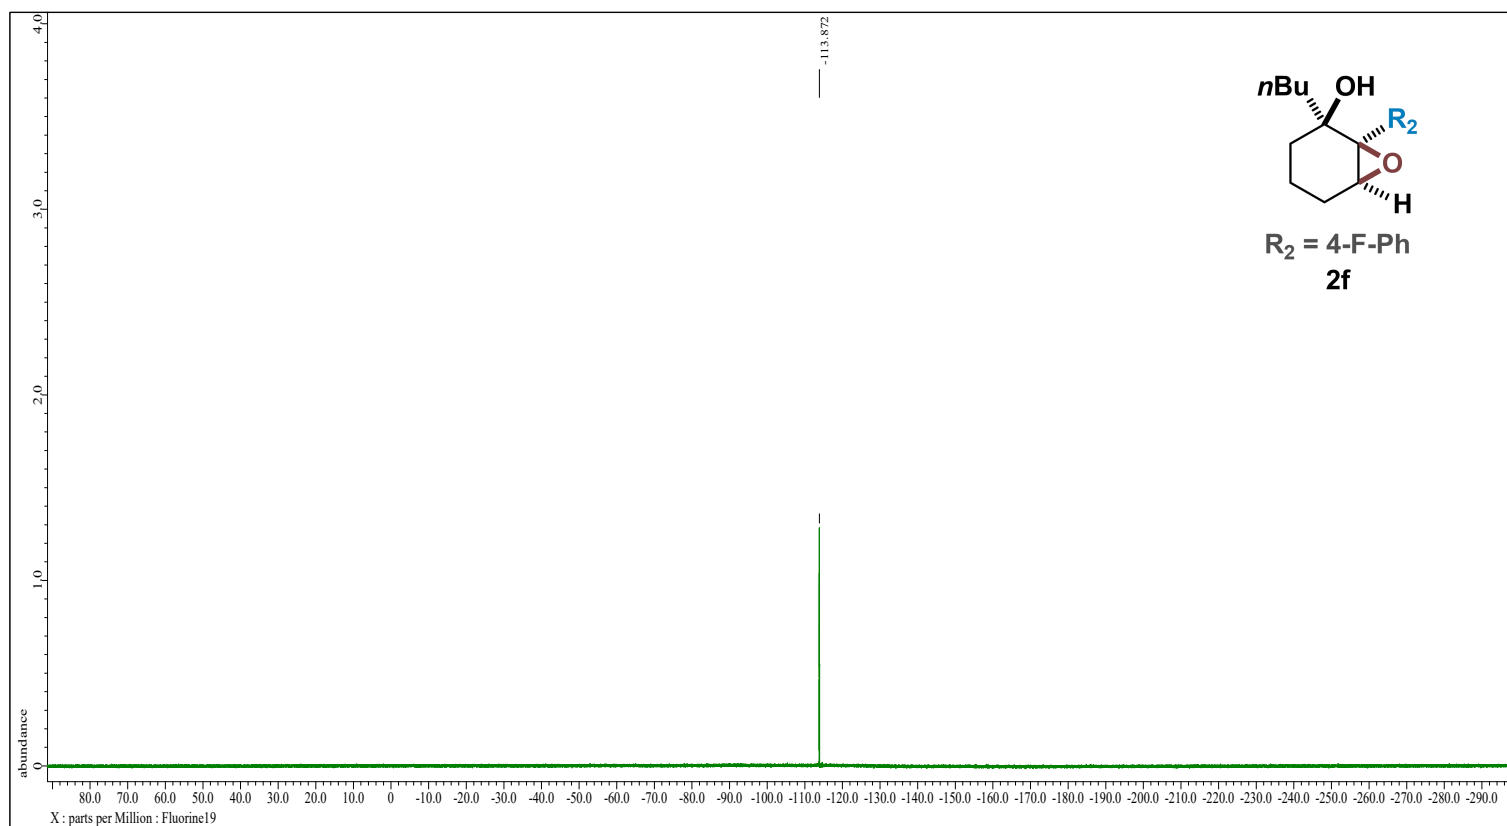

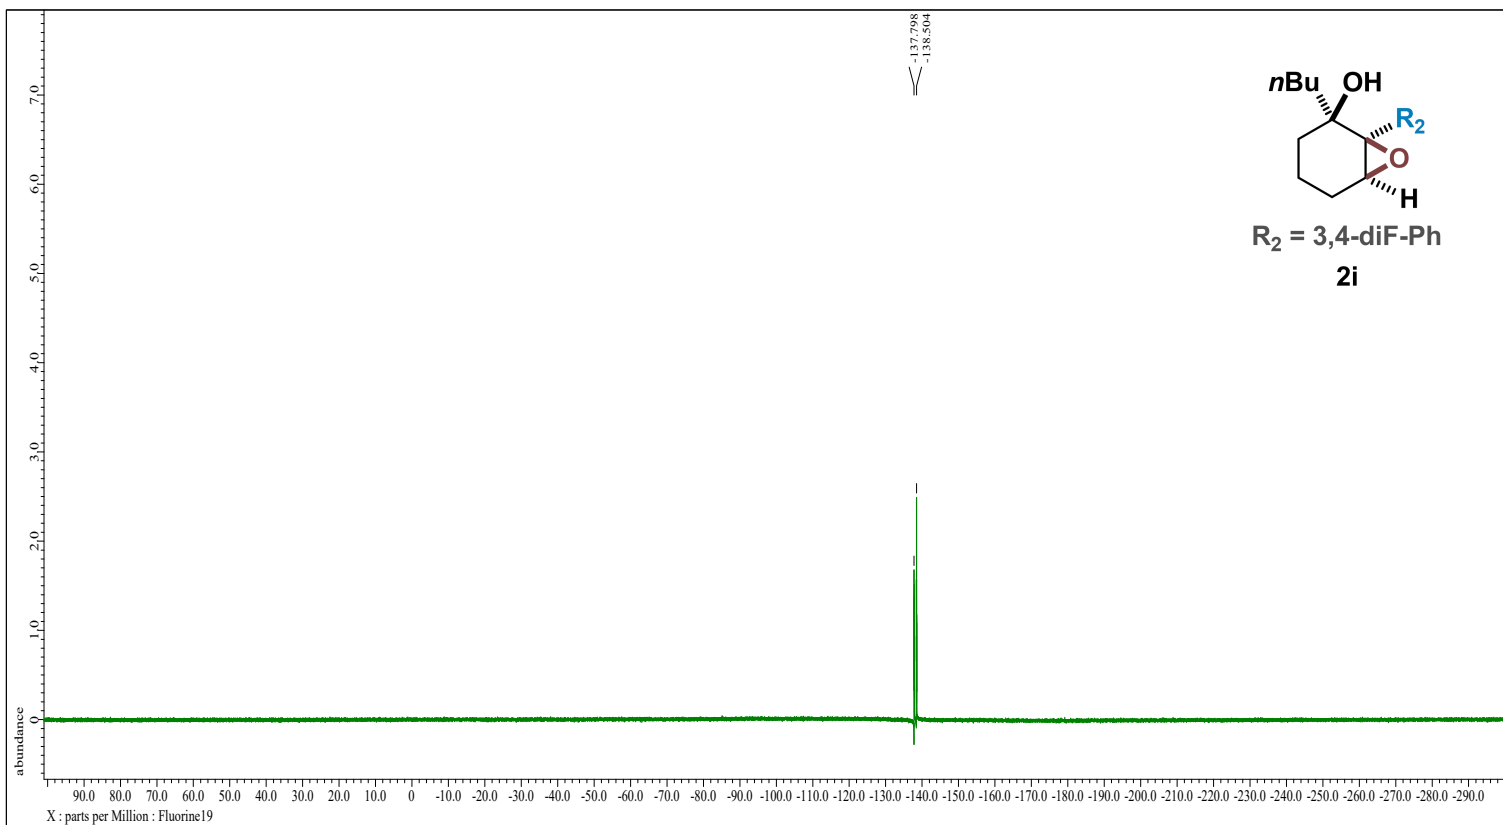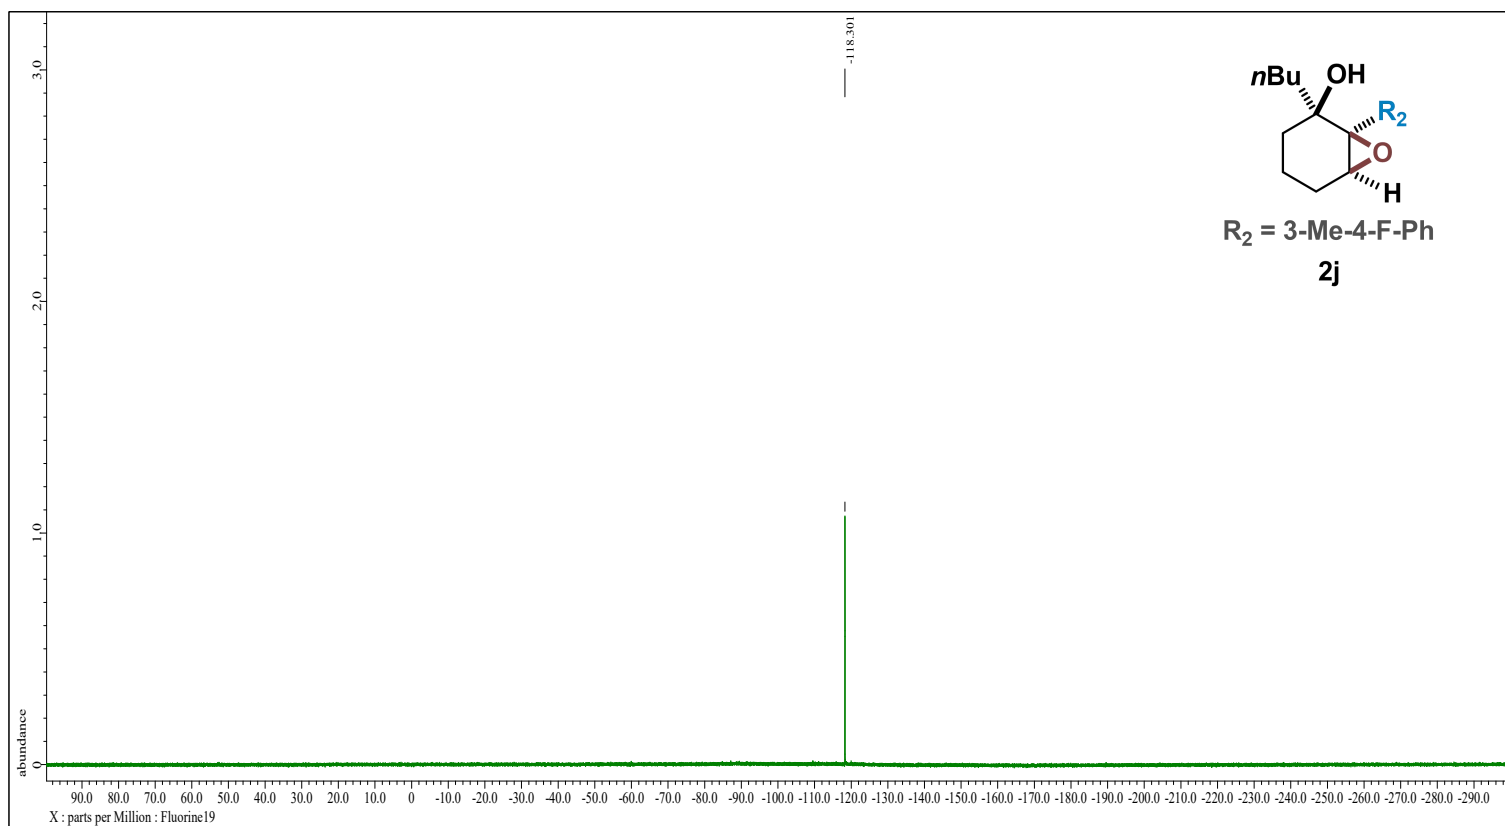

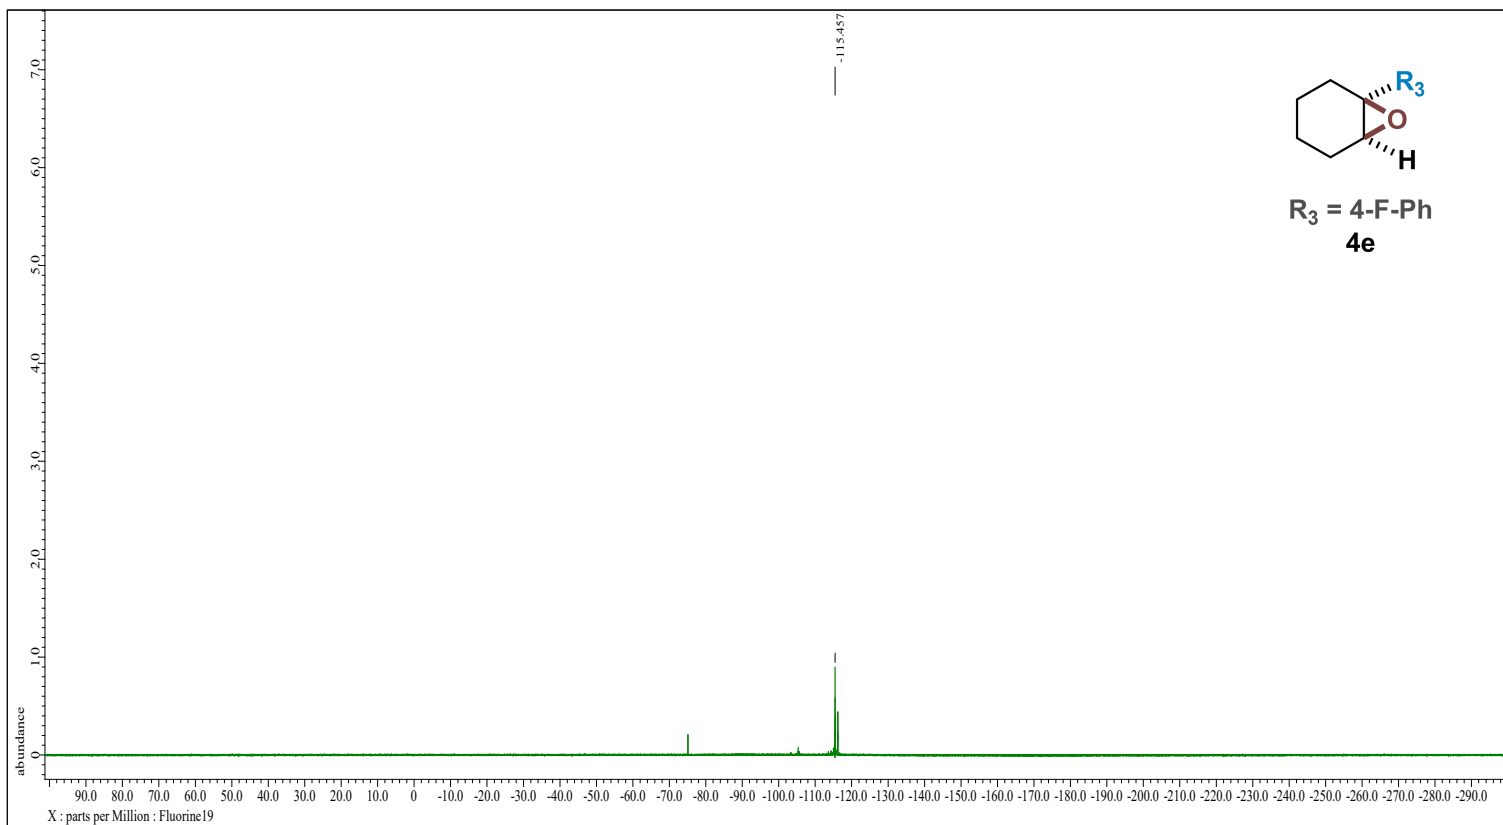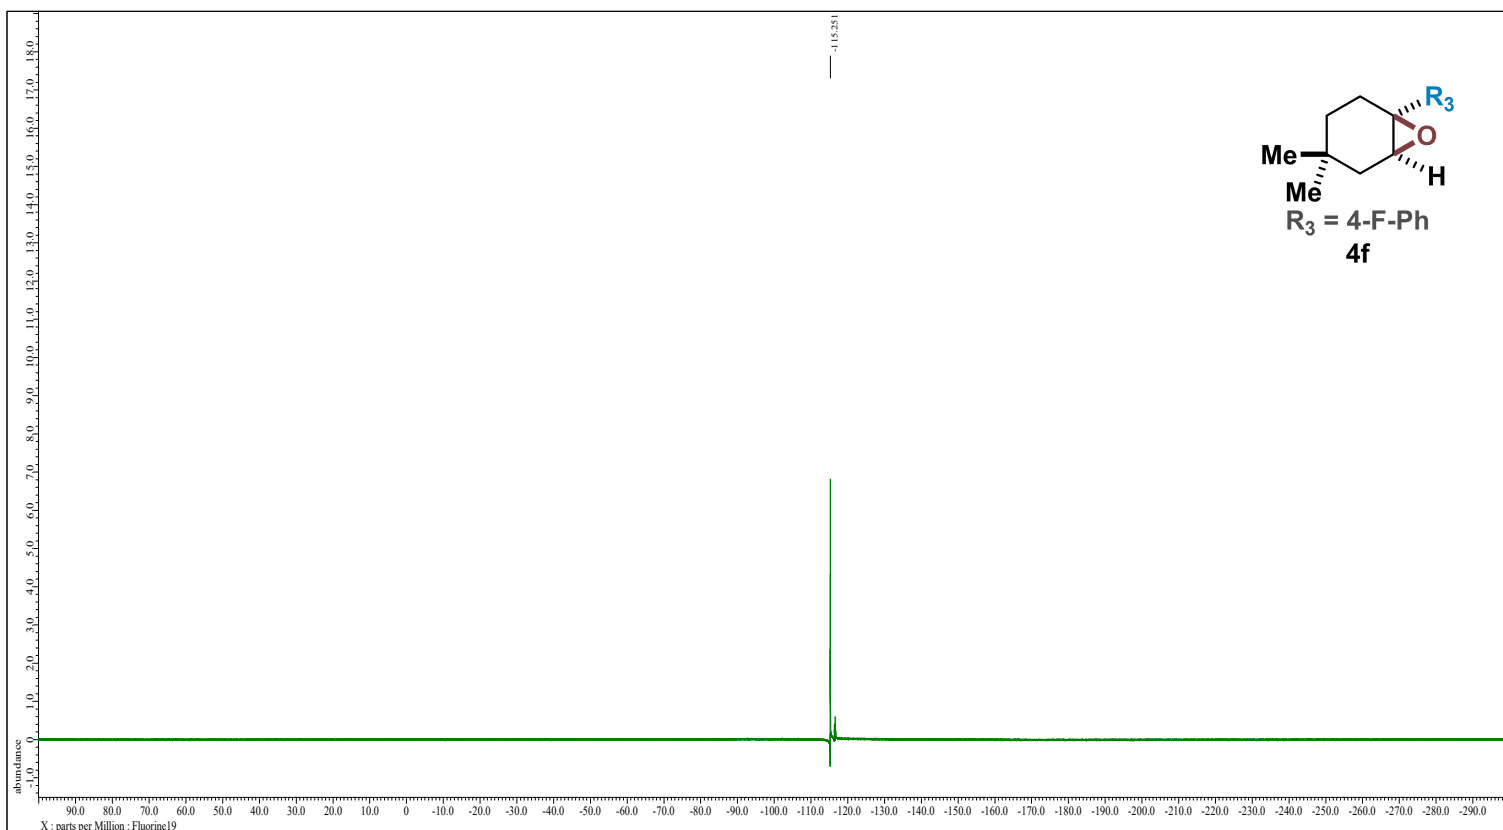

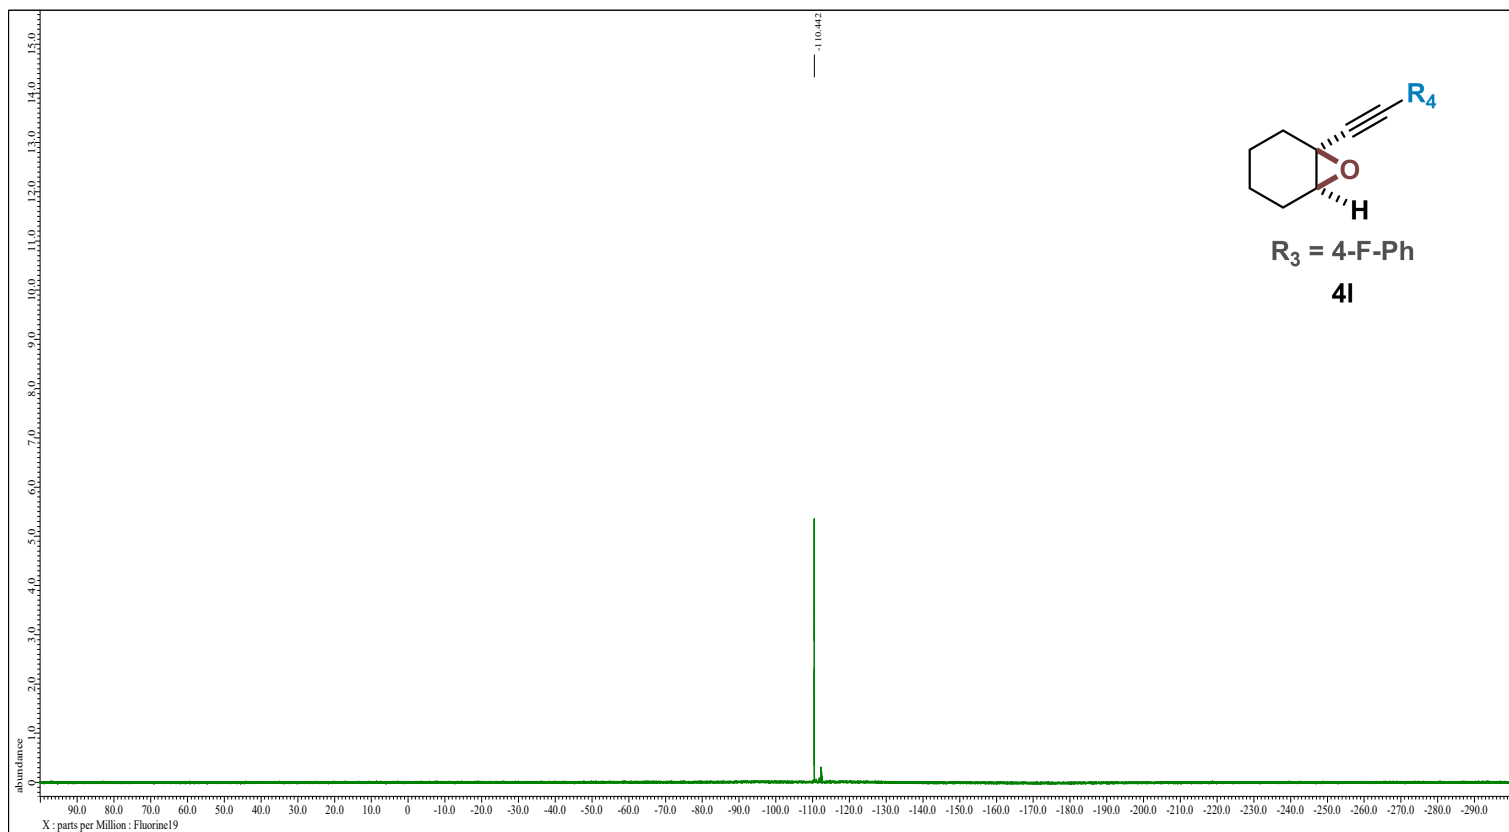







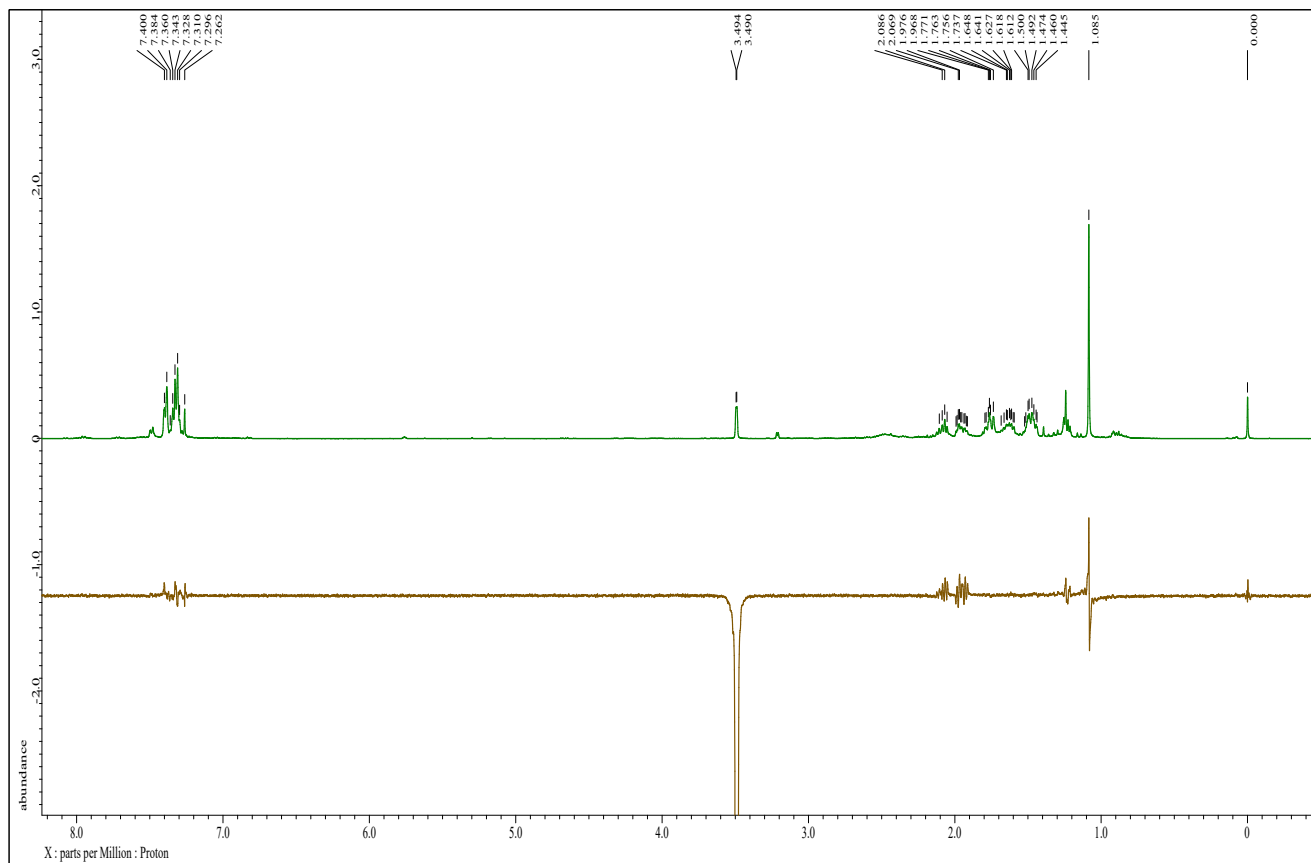

1D NOE

## High resolution mass spectrometry data of intermediate V

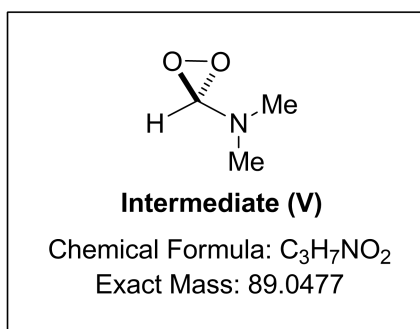

HRMS calculated for  $C_3H_8O_2N$  ( $M + H^+$ ): 90.0555, found: 90.0550.

D:\Raw Data\...49\_20240829154214

08/29/24 15:42:14

49\_20240829154214 #13 RT: 0.12 AV: 1 NL: 2.54E5  
T: FTMS + p ESI Full ms [50.0000-750.0000]

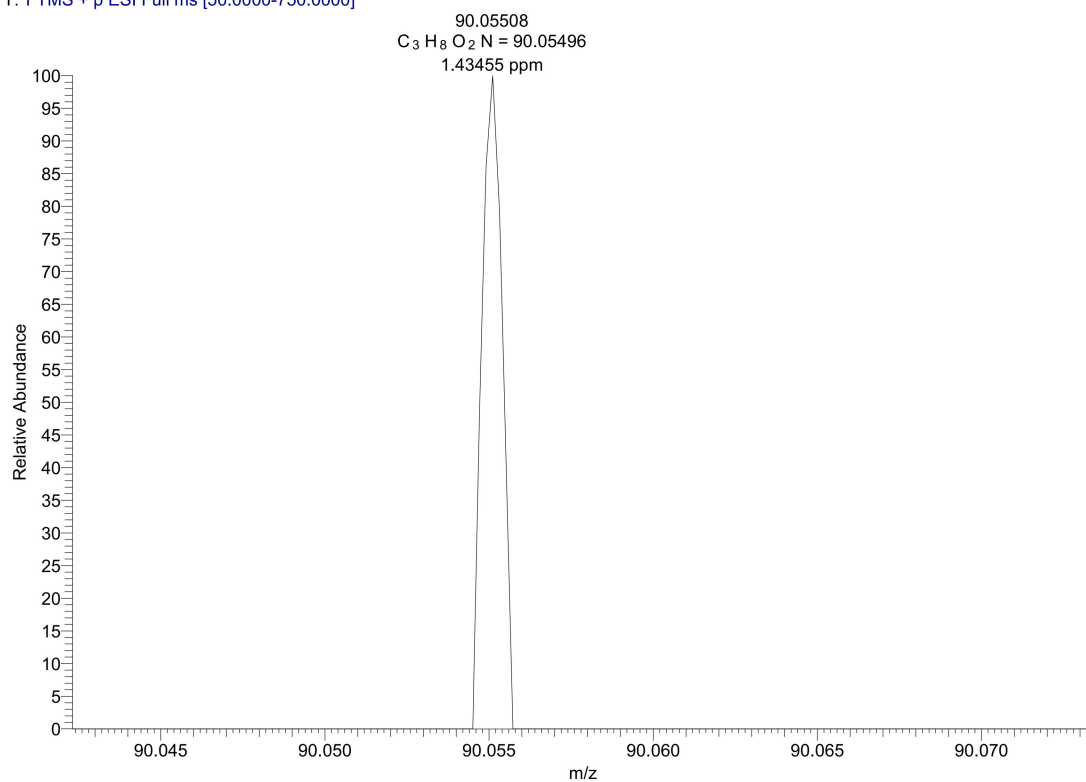

Supplement: d4qo01265h1.pdf [file d4qo01265h1.pdf]
